# Supplementary material for: Radicals organized by disk shaped aromatics – polymorphism and co-crystals that tune inter-electron exchange
Source: Royal Society of Chemistry journal article supplement (doi:10.1039/c1ce06096a), 2011-12-17
Supplement: c1ce06096a.mryx [file c1ce06096a.mryx › c1ce06096a.mryx.out]

<!DOCTYPE CCDC_XML>
<All>
 <graphics_crystal type="Container" >
  <count type="int" >1</count>
  <item type="Handle" >
   <serial_number type="int" >1</serial_number>
   <value type="GraphicsCrystal" >
    <graphics_crystal_memento type="GraphicsCrystalMemento" >
     <graphics_object type="GraphicsObject" >
      <color type="RGBA" >
       <red type="float" >1</red>
       <green type="float" >1</green>
       <blue type="float" >1</blue>
       <alpha type="float" >1</alpha>
      </color>
      <style type="GraphicsObject::RenderingStyle" >
       <enumerator type="int" >1</enumerator>
      </style>
      <label type="string" >phl006_0m</label>
      <options type="int" >851971</options>
     </graphics_object>
     <crystal type="Handle" >
      <serial_number type="int" >2</serial_number>
      <value type="CrystalStructureViewMemento" >
       <crystal_structure type="Handle" >
        <serial_number type="int" >3</serial_number>
        <value type="ConcreteCrystalStructure" >
         <cell type="Handle" >
          <serial_number type="int" >4</serial_number>
          <value type="Cell" >
           <a type="UncertainValue" >
            <value type="float" >14.428000000000001</value>
            <uncertainty type="Uncertainty" >
             <precision type="int" >3</precision>
             <uncertainty type="int" >2</uncertainty>
            </uncertainty>
           </a>
           <b type="UncertainValue" >
            <value type="float" >7.4071999999999996</value>
            <uncertainty type="Uncertainty" >
             <precision type="int" >4</precision>
             <uncertainty type="int" >12</uncertainty>
            </uncertainty>
           </b>
           <c type="UncertainValue" >
            <value type="float" >33.289000000000001</value>
            <uncertainty type="Uncertainty" >
             <precision type="int" >3</precision>
             <uncertainty type="int" >5</uncertainty>
            </uncertainty>
           </c>
           <alpha type="UncertainValue" >
            <value type="float" >1.5707963267948966</value>
            <uncertainty type="Uncertainty" >
             <precision type="int" >2</precision>
             <uncertainty type="int" >0</uncertainty>
            </uncertainty>
           </alpha>
           <beta type="UncertainValue" >
            <value type="float" >1.5966795596019725</value>
            <uncertainty type="Uncertainty" >
             <precision type="int" >3</precision>
             <uncertainty type="int" >2</uncertainty>
            </uncertainty>
           </beta>
           <gamma type="UncertainValue" >
            <value type="float" >1.5707963267948966</value>
            <uncertainty type="Uncertainty" >
             <precision type="int" >2</precision>
             <uncertainty type="int" >0</uncertainty>
            </uncertainty>
           </gamma>
           <spacegroup type="Spacegroup" >
            <number type="int" >14</number>
            <name type="string" >P21/n</name>
            <setting type="int" >6</setting>
            <system type="Spacegroup::System" >
             <enumerator type="int" >0</enumerator>
            </system>
            <crystal_symmetry_operators type="Handle" >
             <serial_number type="int" >5</serial_number>
             <value type="Container" >
              <count type="int" >4</count>
              <item type="CrystalSymmetryOperator" >
               <rotation type="Matrix" >
                <matrix type="Vector" >
                 <vector type="Container" >
                  <count type="int" >9</count>
                  <item type="int" >1</item>
                  <item type="int" >0</item>
                  <item type="int" >0</item>
                  <item type="int" >0</item>
                  <item type="int" >1</item>
                  <item type="int" >0</item>
                  <item type="int" >0</item>
                  <item type="int" >0</item>
                  <item type="int" >1</item>
                 </vector>
                </matrix>
               </rotation>
               <translation type="Vector" >
                <vector type="Container" >
                 <count type="int" >3</count>
                 <item type="float" >0</item>
                 <item type="float" >0</item>
                 <item type="float" >0</item>
                </vector>
               </translation>
              </item>
              <item type="CrystalSymmetryOperator" >
               <rotation type="Matrix" >
                <matrix type="Vector" >
                 <vector type="Container" >
                  <count type="int" >9</count>
                  <item type="int" >-1</item>
                  <item type="int" >0</item>
                  <item type="int" >0</item>
                  <item type="int" >0</item>
                  <item type="int" >1</item>
                  <item type="int" >0</item>
                  <item type="int" >0</item>
                  <item type="int" >0</item>
                  <item type="int" >-1</item>
                 </vector>
                </matrix>
               </rotation>
               <translation type="Vector" >
                <vector type="Container" >
                 <count type="int" >3</count>
                 <item type="float" >0.5</item>
                 <item type="float" >0.5</item>
                 <item type="float" >0.5</item>
                </vector>
               </translation>
              </item>
              <item type="CrystalSymmetryOperator" >
               <rotation type="Matrix" >
                <matrix type="Vector" >
                 <vector type="Container" >
                  <count type="int" >9</count>
                  <item type="int" >-1</item>
                  <item type="int" >0</item>
                  <item type="int" >0</item>
                  <item type="int" >0</item>
                  <item type="int" >-1</item>
                  <item type="int" >0</item>
                  <item type="int" >0</item>
                  <item type="int" >0</item>
                  <item type="int" >-1</item>
                 </vector>
                </matrix>
               </rotation>
               <translation type="Vector" >
                <vector type="Container" >
                 <count type="int" >3</count>
                 <item type="float" >0</item>
                 <item type="float" >0</item>
                 <item type="float" >0</item>
                </vector>
               </translation>
              </item>
              <item type="CrystalSymmetryOperator" >
               <rotation type="Matrix" >
                <matrix type="Vector" >
                 <vector type="Container" >
                  <count type="int" >9</count>
                  <item type="int" >1</item>
                  <item type="int" >0</item>
                  <item type="int" >0</item>
                  <item type="int" >0</item>
                  <item type="int" >-1</item>
                  <item type="int" >0</item>
                  <item type="int" >0</item>
                  <item type="int" >0</item>
                  <item type="int" >1</item>
                 </vector>
                </matrix>
               </rotation>
               <translation type="Vector" >
                <vector type="Container" >
                 <count type="int" >3</count>
                 <item type="float" >0.5</item>
                 <item type="float" >0.5</item>
                 <item type="float" >0.5</item>
                </vector>
               </translation>
              </item>
             </value>
            </crystal_symmetry_operators>
           </spacegroup>
           <frac_to_orth type="Matrix" >
            <matrix type="Vector" >
             <vector type="Container" >
              <count type="int" >9</count>
              <item type="float" >14.428000000000001</item>
              <item type="float" >4.5356018853221373e-16</item>
              <item type="float" >-0.86153073349570353</item>
              <item type="float" >0</item>
              <item type="float" >7.4071999999999996</item>
              <item type="float" >2.0911169075979415e-15</item>
              <item type="float" >0</item>
              <item type="float" >0</item>
              <item type="float" >33.277849777220318</item>
             </vector>
            </matrix>
           </frac_to_orth>
           <orth_to_frac type="Matrix" >
            <matrix type="Vector" >
             <vector type="Container" >
              <count type="int" >9</count>
              <item type="float" >0.069309675630718048</item>
              <item type="float" >-4.2439936205550077e-18</item>
              <item type="float" >0.0017943591934042786</item>
              <item type="float" >0</item>
              <item type="float" >0.13500378010584296</item>
              <item type="float" >-8.4833812598736937e-18</item>
              <item type="float" >0</item>
              <item type="float" >0</item>
              <item type="float" >0.030050018456556943</item>
             </vector>
            </matrix>
           </orth_to_frac>
           <valid type="bool" >true</valid>
          </value>
         </cell>
         <molecule type="Handle" >
          <serial_number type="int" >6</serial_number>
          <value type="Molecule3d" >
           <atoms type="Container" >
            <count type="int" >96</count>
            <item type="Handle" >
             <serial_number type="int" >7</serial_number>
             <value type="Atom3d" >
              <element type="Element" >
               <code type="char" >64</code>
              </element>
              <formal_charge type="int" >0</formal_charge>
              <radius type="float" >0.68000000000000005</radius>
              <label type="string" >O1</label>
              <site type="Handle" >
               <serial_number type="int" >8</serial_number>
               <value type="Site" >
                <orthogonal type="Point" >
                 <coordinates type="Vector" >
                  <vector type="Container" >
                   <count type="int" >3</count>
                   <item type="float" >2.8412445221565443</item>
                   <item type="float" >3.2065768800000001</item>
                   <item type="float" >3.440929666964581</item>
                  </vector>
                 </coordinates>
                </orthogonal>
                <fractional type="Point" >
                 <coordinates type="Vector" >
                  <vector type="Container" >
                   <count type="int" >3</count>
                   <item type="float" >0.2031</item>
                   <item type="float" >0.43290000000000001</item>
                   <item type="float" >0.10340000000000001</item>
                  </vector>
                 </coordinates>
                </fractional>
                <uncertain_value type="UncertainValue" >
                 <value type="float" >1</value>
                 <uncertainty type="Uncertainty" >
                  <precision type="int" >0</precision>
                  <uncertainty type="int" >0</uncertainty>
                 </uncertainty>
                </uncertain_value>
                <uncertainty type="Handle" >
                 <serial_number type="int" >9</serial_number>
                 <value type="Container" >
                  <count type="int" >3</count>
                  <item type="Uncertainty" >
                   <precision type="int" >5</precision>
                   <uncertainty type="int" >15</uncertainty>
                  </item>
                  <item type="Uncertainty" >
                   <precision type="int" >4</precision>
                   <uncertainty type="int" >3</uncertainty>
                  </item>
                  <item type="Uncertainty" >
                   <precision type="int" >5</precision>
                   <uncertainty type="int" >6</uncertainty>
                  </item>
                 </value>
                </uncertainty>
                <adps type="Handle" >
                 <serial_number type="int" >10</serial_number>
                 <value type="AtomicDisplacementParameters" >
                  <uvalues type="Container" >
                   <count type="int" >6</count>
                   <item type="UncertainValue" >
                    <value type="float" >0.023699999999999999</value>
                    <uncertainty type="Uncertainty" >
                     <precision type="int" >4</precision>
                     <uncertainty type="int" >14</uncertainty>
                    </uncertainty>
                   </item>
                   <item type="UncertainValue" >
                    <value type="float" >0.0482</value>
                    <uncertainty type="Uncertainty" >
                     <precision type="int" >4</precision>
                     <uncertainty type="int" >16</uncertainty>
                    </uncertainty>
                   </item>
                   <item type="UncertainValue" >
                    <value type="float" >0.029100000000000001</value>
                    <uncertainty type="Uncertainty" >
                     <precision type="int" >4</precision>
                     <uncertainty type="int" >13</uncertainty>
                    </uncertainty>
                   </item>
                   <item type="UncertainValue" >
                    <value type="float" >-0.0061999999999999998</value>
                    <uncertainty type="Uncertainty" >
                     <precision type="int" >4</precision>
                     <uncertainty type="int" >12</uncertainty>
                    </uncertainty>
                   </item>
                   <item type="UncertainValue" >
                    <value type="float" >-0.0132</value>
                    <uncertainty type="Uncertainty" >
                     <precision type="int" >4</precision>
                     <uncertainty type="int" >11</uncertainty>
                    </uncertainty>
                   </item>
                   <item type="UncertainValue" >
                    <value type="float" >0.00089999999999999998</value>
                    <uncertainty type="Uncertainty" >
                     <precision type="int" >4</precision>
                     <uncertainty type="int" >12</uncertainty>
                    </uncertainty>
                   </item>
                  </uvalues>
                  <type type="AtomicDisplacementParameters::Type" >
                   <enumerator type="int" >0</enumerator>
                  </type>
                  <u_equivalent type="float" >0.033906362572057473</u_equivalent>
                 </value>
                </adps>
               </value>
              </site>
              <annotations type="Annotations" >
               <annotations type="Container" >
                <count type="int" >1</count>
                <item type="Handle" >
                 <serial_number type="int" >11</serial_number>
                 <value type="FileOrdering" >
                  <value type="Handle" >
                   <serial_number type="int" >12</serial_number>
                   <value type="FileOrdering" >
                    <file_order type="int" >0</file_order>
                   </value>
                  </value>
                 </value>
                </item>
               </annotations>
              </annotations>
             </value>
            </item>
            <item type="Handle" >
             <serial_number type="int" >13</serial_number>
             <value type="Atom3d" >
              <element type="Element" >
               <code type="char" >64</code>
              </element>
              <formal_charge type="int" >0</formal_charge>
              <radius type="float" >0.68000000000000005</radius>
              <label type="string" >O2</label>
              <site type="Handle" >
               <serial_number type="int" >14</serial_number>
               <value type="Site" >
                <orthogonal type="Point" >
                 <coordinates type="Vector" >
                  <vector type="Container" >
                   <count type="int" >3</count>
                   <item type="float" >-0.43200174979363665</item>
                   <item type="float" >2.1214220799999999</item>
                   <item type="float" >0.33544072575438083</item>
                  </vector>
                 </coordinates>
                </orthogonal>
                <fractional type="Point" >
                 <coordinates type="Vector" >
                  <vector type="Container" >
                   <count type="int" >3</count>
                   <item type="float" >-0.029340000000000001</item>
                   <item type="float" >0.28639999999999999</item>
                   <item type="float" >0.01008</item>
                  </vector>
                 </coordinates>
                </fractional>
                <uncertain_value type="UncertainValue" >
                 <value type="float" >1</value>
                 <uncertainty type="Uncertainty" >
                  <precision type="int" >0</precision>
                  <uncertainty type="int" >0</uncertainty>
                 </uncertainty>
                </uncertain_value>
                <uncertainty type="Handle" >
                 <serial_number type="int" >15</serial_number>
                 <value type="Container" >
                  <count type="int" >3</count>
                  <item type="Uncertainty" >
                   <precision type="int" >5</precision>
                   <uncertainty type="int" >16</uncertainty>
                  </item>
                  <item type="Uncertainty" >
                   <precision type="int" >4</precision>
                   <uncertainty type="int" >3</uncertainty>
                  </item>
                  <item type="Uncertainty" >
                   <precision type="int" >5</precision>
                   <uncertainty type="int" >7</uncertainty>
                  </item>
                 </value>
                </uncertainty>
                <adps type="Handle" >
                 <serial_number type="int" >16</serial_number>
                 <value type="AtomicDisplacementParameters" >
                  <uvalues type="Container" >
                   <count type="int" >6</count>
                   <item type="UncertainValue" >
                    <value type="float" >0.040500000000000001</value>
                    <uncertainty type="Uncertainty" >
                     <precision type="int" >4</precision>
                     <uncertainty type="int" >15</uncertainty>
                    </uncertainty>
                   </item>
                   <item type="UncertainValue" >
                    <value type="float" >0.035499999999999997</value>
                    <uncertainty type="Uncertainty" >
                     <precision type="int" >4</precision>
                     <uncertainty type="int" >15</uncertainty>
                    </uncertainty>
                   </item>
                   <item type="UncertainValue" >
                    <value type="float" >0.027900000000000001</value>
                    <uncertainty type="Uncertainty" >
                     <precision type="int" >4</precision>
                     <uncertainty type="int" >14</uncertainty>
                    </uncertainty>
                   </item>
                   <item type="UncertainValue" >
                    <value type="float" >-0.0061000000000000004</value>
                    <uncertainty type="Uncertainty" >
                     <precision type="int" >4</precision>
                     <uncertainty type="int" >12</uncertainty>
                    </uncertainty>
                   </item>
                   <item type="UncertainValue" >
                    <value type="float" >-0.0152</value>
                    <uncertainty type="Uncertainty" >
                     <precision type="int" >4</precision>
                     <uncertainty type="int" >12</uncertainty>
                    </uncertainty>
                   </item>
                   <item type="UncertainValue" >
                    <value type="float" >-0.0011999999999999999</value>
                    <uncertainty type="Uncertainty" >
                     <precision type="int" >4</precision>
                     <uncertainty type="int" >11</uncertainty>
                    </uncertainty>
                   </item>
                  </uvalues>
                  <type type="AtomicDisplacementParameters::Type" >
                   <enumerator type="int" >0</enumerator>
                  </type>
                  <u_equivalent type="float" >0.03491104474418795</u_equivalent>
                 </value>
                </adps>
               </value>
              </site>
              <annotations type="Annotations" >
               <annotations type="Container" >
                <count type="int" >1</count>
                <item type="Handle" >
                 <serial_number type="int" >17</serial_number>
                 <value type="FileOrdering" >
                  <value type="Handle" >
                   <serial_number type="int" >18</serial_number>
                   <value type="FileOrdering" >
                    <file_order type="int" >1</file_order>
                   </value>
                  </value>
                 </value>
                </item>
               </annotations>
              </annotations>
             </value>
            </item>
            <item type="Handle" >
             <serial_number type="int" >19</serial_number>
             <value type="Atom3d" >
              <element type="Element" >
               <code type="char" >56</code>
              </element>
              <formal_charge type="int" >0</formal_charge>
              <radius type="float" >0.68000000000000005</radius>
              <label type="string" >N1</label>
              <site type="Handle" >
               <serial_number type="int" >20</serial_number>
               <value type="Site" >
                <orthogonal type="Point" >
                 <coordinates type="Vector" >
                  <vector type="Container" >
                   <count type="int" >3</count>
                   <item type="float" >1.7005114606073892</item>
                   <item type="float" >3.0710251199999998</item>
                   <item type="float" >2.8579017388676808</item>
                  </vector>
                 </coordinates>
                </orthogonal>
                <fractional type="Point" >
                 <coordinates type="Vector" >
                  <vector type="Container" >
                   <count type="int" >3</count>
                   <item type="float" >0.12299</item>
                   <item type="float" >0.41460000000000002</item>
                   <item type="float" >0.085879999999999998</item>
                  </vector>
                 </coordinates>
                </fractional>
                <uncertain_value type="UncertainValue" >
                 <value type="float" >1</value>
                 <uncertainty type="Uncertainty" >
                  <precision type="int" >0</precision>
                  <uncertainty type="int" >0</uncertainty>
                 </uncertainty>
                </uncertain_value>
                <uncertainty type="Handle" >
                 <serial_number type="int" >21</serial_number>
                 <value type="Container" >
                  <count type="int" >3</count>
                  <item type="Uncertainty" >
                   <precision type="int" >5</precision>
                   <uncertainty type="int" >19</uncertainty>
                  </item>
                  <item type="Uncertainty" >
                   <precision type="int" >4</precision>
                   <uncertainty type="int" >4</uncertainty>
                  </item>
                  <item type="Uncertainty" >
                   <precision type="int" >5</precision>
                   <uncertainty type="int" >8</uncertainty>
                  </item>
                 </value>
                </uncertainty>
                <adps type="Handle" >
                 <serial_number type="int" >22</serial_number>
                 <value type="AtomicDisplacementParameters" >
                  <uvalues type="Container" >
                   <count type="int" >6</count>
                   <item type="UncertainValue" >
                    <value type="float" >0.029999999999999999</value>
                    <uncertainty type="Uncertainty" >
                     <precision type="int" >4</precision>
                     <uncertainty type="int" >17</uncertainty>
                    </uncertainty>
                   </item>
                   <item type="UncertainValue" >
                    <value type="float" >0.0292</value>
                    <uncertainty type="Uncertainty" >
                     <precision type="int" >4</precision>
                     <uncertainty type="int" >18</uncertainty>
                    </uncertainty>
                   </item>
                   <item type="UncertainValue" >
                    <value type="float" >0.023900000000000001</value>
                    <uncertainty type="Uncertainty" >
                     <precision type="int" >4</precision>
                     <uncertainty type="int" >15</uncertainty>
                    </uncertainty>
                   </item>
                   <item type="UncertainValue" >
                    <value type="float" >-0.0050000000000000001</value>
                    <uncertainty type="Uncertainty" >
                     <precision type="int" >4</precision>
                     <uncertainty type="int" >14</uncertainty>
                    </uncertainty>
                   </item>
                   <item type="UncertainValue" >
                    <value type="float" >-0.0095999999999999992</value>
                    <uncertainty type="Uncertainty" >
                     <precision type="int" >4</precision>
                     <uncertainty type="int" >13</uncertainty>
                    </uncertainty>
                   </item>
                   <item type="UncertainValue" >
                    <value type="float" >0.0043</value>
                    <uncertainty type="Uncertainty" >
                     <precision type="int" >4</precision>
                     <uncertainty type="int" >13</uncertainty>
                    </uncertainty>
                   </item>
                  </uvalues>
                  <type type="AtomicDisplacementParameters::Type" >
                   <enumerator type="int" >0</enumerator>
                  </type>
                  <u_equivalent type="float" >0.027877787207018483</u_equivalent>
                 </value>
                </adps>
               </value>
              </site>
              <annotations type="Annotations" >
               <annotations type="Container" >
                <count type="int" >1</count>
                <item type="Handle" >
                 <serial_number type="int" >23</serial_number>
                 <value type="FileOrdering" >
                  <value type="Handle" >
                   <serial_number type="int" >24</serial_number>
                   <value type="FileOrdering" >
                    <file_order type="int" >2</file_order>
                   </value>
                  </value>
                 </value>
                </item>
               </annotations>
              </annotations>
             </value>
            </item>
            <item type="Handle" >
             <serial_number type="int" >25</serial_number>
             <value type="Atom3d" >
              <element type="Element" >
               <code type="char" >56</code>
              </element>
              <formal_charge type="int" >0</formal_charge>
              <radius type="float" >0.68000000000000005</radius>
              <label type="string" >N2</label>
              <site type="Handle" >
               <serial_number type="int" >26</serial_number>
               <value type="Site" >
                <orthogonal type="Point" >
                 <coordinates type="Vector" >
                  <vector type="Container" >
                   <count type="int" >3</count>
                   <item type="float" >0.15322514282178723</item>
                   <item type="float" >2.5103000799999995</item>
                   <item type="float" >1.4099824950608248</item>
                  </vector>
                 </coordinates>
                </orthogonal>
                <fractional type="Point" >
                 <coordinates type="Vector" >
                  <vector type="Container" >
                   <count type="int" >3</count>
                   <item type="float" >0.01315</item>
                   <item type="float" >0.33889999999999998</item>
                   <item type="float" >0.042369999999999998</item>
                  </vector>
                 </coordinates>
                </fractional>
                <uncertain_value type="UncertainValue" >
                 <value type="float" >1</value>
                 <uncertainty type="Uncertainty" >
                  <precision type="int" >0</precision>
                  <uncertainty type="int" >0</uncertainty>
                 </uncertainty>
                </uncertain_value>
                <uncertainty type="Handle" >
                 <serial_number type="int" >27</serial_number>
                 <value type="Container" >
                  <count type="int" >3</count>
                  <item type="Uncertainty" >
                   <precision type="int" >5</precision>
                   <uncertainty type="int" >19</uncertainty>
                  </item>
                  <item type="Uncertainty" >
                   <precision type="int" >4</precision>
                   <uncertainty type="int" >4</uncertainty>
                  </item>
                  <item type="Uncertainty" >
                   <precision type="int" >5</precision>
                   <uncertainty type="int" >8</uncertainty>
                  </item>
                 </value>
                </uncertainty>
                <adps type="Handle" >
                 <serial_number type="int" >28</serial_number>
                 <value type="AtomicDisplacementParameters" >
                  <uvalues type="Container" >
                   <count type="int" >6</count>
                   <item type="UncertainValue" >
                    <value type="float" >0.029999999999999999</value>
                    <uncertainty type="Uncertainty" >
                     <precision type="int" >4</precision>
                     <uncertainty type="int" >17</uncertainty>
                    </uncertainty>
                   </item>
                   <item type="UncertainValue" >
                    <value type="float" >0.025899999999999999</value>
                    <uncertainty type="Uncertainty" >
                     <precision type="int" >4</precision>
                     <uncertainty type="int" >17</uncertainty>
                    </uncertainty>
                   </item>
                   <item type="UncertainValue" >
                    <value type="float" >0.0223</value>
                    <uncertainty type="Uncertainty" >
                     <precision type="int" >4</precision>
                     <uncertainty type="int" >15</uncertainty>
                    </uncertainty>
                   </item>
                   <item type="UncertainValue" >
                    <value type="float" >-0.0035000000000000001</value>
                    <uncertainty type="Uncertainty" >
                     <precision type="int" >4</precision>
                     <uncertainty type="int" >14</uncertainty>
                    </uncertainty>
                   </item>
                   <item type="UncertainValue" >
                    <value type="float" >-0.0097999999999999997</value>
                    <uncertainty type="Uncertainty" >
                     <precision type="int" >4</precision>
                     <uncertainty type="int" >13</uncertainty>
                    </uncertainty>
                   </item>
                   <item type="UncertainValue" >
                    <value type="float" >-0.0001</value>
                    <uncertainty type="Uncertainty" >
                     <precision type="int" >4</precision>
                     <uncertainty type="int" >13</uncertainty>
                    </uncertainty>
                   </item>
                  </uvalues>
                  <type type="AtomicDisplacementParameters::Type" >
                   <enumerator type="int" >0</enumerator>
                  </type>
                  <u_equivalent type="float" >0.026247549436972387</u_equivalent>
                 </value>
                </adps>
               </value>
              </site>
              <annotations type="Annotations" >
               <annotations type="Container" >
                <count type="int" >1</count>
                <item type="Handle" >
                 <serial_number type="int" >29</serial_number>
                 <value type="FileOrdering" >
                  <value type="Handle" >
                   <serial_number type="int" >30</serial_number>
                   <value type="FileOrdering" >
                    <file_order type="int" >3</file_order>
                   </value>
                  </value>
                 </value>
                </item>
               </annotations>
              </annotations>
             </value>
            </item>
            <item type="Handle" >
             <serial_number type="int" >31</serial_number>
             <value type="Atom3d" >
              <element type="Element" >
               <code type="char" >1</code>
              </element>
              <formal_charge type="int" >0</formal_charge>
              <radius type="float" >0.68000000000000005</radius>
              <label type="string" >C1</label>
              <site type="Handle" >
               <serial_number type="int" >32</serial_number>
               <value type="Site" >
                <orthogonal type="Point" >
                 <coordinates type="Vector" >
                  <vector type="Container" >
                   <count type="int" >3</count>
                   <item type="float" >1.4909001247922067</item>
                   <item type="float" >2.6369631999999998</item>
                   <item type="float" >1.5973367893065753</item>
                  </vector>
                 </coordinates>
                </orthogonal>
                <fractional type="Point" >
                 <coordinates type="Vector" >
                  <vector type="Container" >
                   <count type="int" >3</count>
                   <item type="float" >0.1062</item>
                   <item type="float" >0.35599999999999998</item>
                   <item type="float" >0.048000000000000001</item>
                  </vector>
                 </coordinates>
                </fractional>
                <uncertain_value type="UncertainValue" >
                 <value type="float" >1</value>
                 <uncertainty type="Uncertainty" >
                  <precision type="int" >0</precision>
                  <uncertainty type="int" >0</uncertainty>
                 </uncertainty>
                </uncertain_value>
                <uncertainty type="Handle" >
                 <serial_number type="int" >33</serial_number>
                 <value type="Container" >
                  <count type="int" >3</count>
                  <item type="Uncertainty" >
                   <precision type="int" >4</precision>
                   <uncertainty type="int" >2</uncertainty>
                  </item>
                  <item type="Uncertainty" >
                   <precision type="int" >4</precision>
                   <uncertainty type="int" >4</uncertainty>
                  </item>
                  <item type="Uncertainty" >
                   <precision type="int" >5</precision>
                   <uncertainty type="int" >9</uncertainty>
                  </item>
                 </value>
                </uncertainty>
                <adps type="Handle" >
                 <serial_number type="int" >34</serial_number>
                 <value type="AtomicDisplacementParameters" >
                  <uvalues type="Container" >
                   <count type="int" >6</count>
                   <item type="UncertainValue" >
                    <value type="float" >0.025999999999999999</value>
                    <uncertainty type="Uncertainty" >
                     <precision type="int" >3</precision>
                     <uncertainty type="int" >2</uncertainty>
                    </uncertainty>
                   </item>
                   <item type="UncertainValue" >
                    <value type="float" >0.023</value>
                    <uncertainty type="Uncertainty" >
                     <precision type="int" >3</precision>
                     <uncertainty type="int" >2</uncertainty>
                    </uncertainty>
                   </item>
                   <item type="UncertainValue" >
                    <value type="float" >0.0269</value>
                    <uncertainty type="Uncertainty" >
                     <precision type="int" >4</precision>
                     <uncertainty type="int" >19</uncertainty>
                    </uncertainty>
                   </item>
                   <item type="UncertainValue" >
                    <value type="float" >-0.0016000000000000001</value>
                    <uncertainty type="Uncertainty" >
                     <precision type="int" >4</precision>
                     <uncertainty type="int" >16</uncertainty>
                    </uncertainty>
                   </item>
                   <item type="UncertainValue" >
                    <value type="float" >-0.0091999999999999998</value>
                    <uncertainty type="Uncertainty" >
                     <precision type="int" >4</precision>
                     <uncertainty type="int" >16</uncertainty>
                    </uncertainty>
                   </item>
                   <item type="UncertainValue" >
                    <value type="float" >0.0035999999999999999</value>
                    <uncertainty type="Uncertainty" >
                     <precision type="int" >4</precision>
                     <uncertainty type="int" >15</uncertainty>
                    </uncertainty>
                   </item>
                  </uvalues>
                  <type type="AtomicDisplacementParameters::Type" >
                   <enumerator type="int" >0</enumerator>
                  </type>
                  <u_equivalent type="float" >0.025470657742947669</u_equivalent>
                 </value>
                </adps>
               </value>
              </site>
              <annotations type="Annotations" >
               <annotations type="Container" >
                <count type="int" >1</count>
                <item type="Handle" >
                 <serial_number type="int" >35</serial_number>
                 <value type="FileOrdering" >
                  <value type="Handle" >
                   <serial_number type="int" >36</serial_number>
                   <value type="FileOrdering" >
                    <file_order type="int" >4</file_order>
                   </value>
                  </value>
                 </value>
                </item>
               </annotations>
              </annotations>
             </value>
            </item>
            <item type="Handle" >
             <serial_number type="int" >37</serial_number>
             <value type="Atom3d" >
              <element type="Element" >
               <code type="char" >1</code>
              </element>
              <formal_charge type="int" >0</formal_charge>
              <radius type="float" >0.68000000000000005</radius>
              <label type="string" >C2</label>
              <site type="Handle" >
               <serial_number type="int" >38</serial_number>
               <value type="Site" >
                <orthogonal type="Point" >
                 <coordinates type="Vector" >
                  <vector type="Container" >
                   <count type="int" >3</count>
                   <item type="float" >0.41177151790031064</item>
                   <item type="float" >3.5332343999999996</item>
                   <item type="float" >3.4888497706437782</item>
                  </vector>
                 </coordinates>
                </orthogonal>
                <fractional type="Point" >
                 <coordinates type="Vector" >
                  <vector type="Container" >
                   <count type="int" >3</count>
                   <item type="float" >0.034799999999999998</item>
                   <item type="float" >0.47699999999999998</item>
                   <item type="float" >0.10484</item>
                  </vector>
                 </coordinates>
                </fractional>
                <uncertain_value type="UncertainValue" >
                 <value type="float" >1</value>
                 <uncertainty type="Uncertainty" >
                  <precision type="int" >0</precision>
                  <uncertainty type="int" >0</uncertainty>
                 </uncertainty>
                </uncertain_value>
                <uncertainty type="Handle" >
                 <serial_number type="int" >39</serial_number>
                 <value type="Container" >
                  <count type="int" >3</count>
                  <item type="Uncertainty" >
                   <precision type="int" >4</precision>
                   <uncertainty type="int" >2</uncertainty>
                  </item>
                  <item type="Uncertainty" >
                   <precision type="int" >4</precision>
                   <uncertainty type="int" >4</uncertainty>
                  </item>
                  <item type="Uncertainty" >
                   <precision type="int" >5</precision>
                   <uncertainty type="int" >9</uncertainty>
                  </item>
                 </value>
                </uncertainty>
                <adps type="Handle" >
                 <serial_number type="int" >40</serial_number>
                 <value type="AtomicDisplacementParameters" >
                  <uvalues type="Container" >
                   <count type="int" >6</count>
                   <item type="UncertainValue" >
                    <value type="float" >0.021999999999999999</value>
                    <uncertainty type="Uncertainty" >
                     <precision type="int" >3</precision>
                     <uncertainty type="int" >2</uncertainty>
                    </uncertainty>
                   </item>
                   <item type="UncertainValue" >
                    <value type="float" >0.031</value>
                    <uncertainty type="Uncertainty" >
                     <precision type="int" >3</precision>
                     <uncertainty type="int" >2</uncertainty>
                    </uncertainty>
                   </item>
                   <item type="UncertainValue" >
                    <value type="float" >0.0207</value>
                    <uncertainty type="Uncertainty" >
                     <precision type="int" >4</precision>
                     <uncertainty type="int" >18</uncertainty>
                    </uncertainty>
                   </item>
                   <item type="UncertainValue" >
                    <value type="float" >-0.0014</value>
                    <uncertainty type="Uncertainty" >
                     <precision type="int" >4</precision>
                     <uncertainty type="int" >16</uncertainty>
                    </uncertainty>
                   </item>
                   <item type="UncertainValue" >
                    <value type="float" >-0.0023999999999999998</value>
                    <uncertainty type="Uncertainty" >
                     <precision type="int" >4</precision>
                     <uncertainty type="int" >15</uncertainty>
                    </uncertainty>
                   </item>
                   <item type="UncertainValue" >
                    <value type="float" >0.0011999999999999999</value>
                    <uncertainty type="Uncertainty" >
                     <precision type="int" >4</precision>
                     <uncertainty type="int" >15</uncertainty>
                    </uncertainty>
                   </item>
                  </uvalues>
                  <type type="AtomicDisplacementParameters::Type" >
                   <enumerator type="int" >0</enumerator>
                  </type>
                  <u_equivalent type="float" >0.024617642733499853</u_equivalent>
                 </value>
                </adps>
               </value>
              </site>
              <annotations type="Annotations" >
               <annotations type="Container" >
                <count type="int" >1</count>
                <item type="Handle" >
                 <serial_number type="int" >41</serial_number>
                 <value type="FileOrdering" >
                  <value type="Handle" >
                   <serial_number type="int" >42</serial_number>
                   <value type="FileOrdering" >
                    <file_order type="int" >5</file_order>
                   </value>
                  </value>
                 </value>
                </item>
               </annotations>
              </annotations>
             </value>
            </item>
            <item type="Handle" >
             <serial_number type="int" >43</serial_number>
             <value type="Atom3d" >
              <element type="Element" >
               <code type="char" >1</code>
              </element>
              <formal_charge type="int" >0</formal_charge>
              <radius type="float" >0.68000000000000005</radius>
              <label type="string" >C3</label>
              <site type="Handle" >
               <serial_number type="int" >44</serial_number>
               <value type="Site" >
                <orthogonal type="Point" >
                 <coordinates type="Vector" >
                  <vector type="Container" >
                   <count type="int" >3</count>
                   <item type="float" >-0.58374817109188026</item>
                   <item type="float" >2.66511056</item>
                   <item type="float" >2.7081514148701893</item>
                  </vector>
                 </coordinates>
                </orthogonal>
                <fractional type="Point" >
                 <coordinates type="Vector" >
                  <vector type="Container" >
                   <count type="int" >3</count>
                   <item type="float" >-0.0356</item>
                   <item type="float" >0.35980000000000001</item>
                   <item type="float" >0.081379999999999994</item>
                  </vector>
                 </coordinates>
                </fractional>
                <uncertain_value type="UncertainValue" >
                 <value type="float" >1</value>
                 <uncertainty type="Uncertainty" >
                  <precision type="int" >0</precision>
                  <uncertainty type="int" >0</uncertainty>
                 </uncertainty>
                </uncertain_value>
                <uncertainty type="Handle" >
                 <serial_number type="int" >45</serial_number>
                 <value type="Container" >
                  <count type="int" >3</count>
                  <item type="Uncertainty" >
                   <precision type="int" >4</precision>
                   <uncertainty type="int" >2</uncertainty>
                  </item>
                  <item type="Uncertainty" >
                   <precision type="int" >4</precision>
                   <uncertainty type="int" >5</uncertainty>
                  </item>
                  <item type="Uncertainty" >
                   <precision type="int" >5</precision>
                   <uncertainty type="int" >9</uncertainty>
                  </item>
                 </value>
                </uncertainty>
                <adps type="Handle" >
                 <serial_number type="int" >46</serial_number>
                 <value type="AtomicDisplacementParameters" >
                  <uvalues type="Container" >
                   <count type="int" >6</count>
                   <item type="UncertainValue" >
                    <value type="float" >0.022800000000000001</value>
                    <uncertainty type="Uncertainty" >
                     <precision type="int" >4</precision>
                     <uncertainty type="int" >19</uncertainty>
                    </uncertainty>
                   </item>
                   <item type="UncertainValue" >
                    <value type="float" >0.032000000000000001</value>
                    <uncertainty type="Uncertainty" >
                     <precision type="int" >3</precision>
                     <uncertainty type="int" >2</uncertainty>
                    </uncertainty>
                   </item>
                   <item type="UncertainValue" >
                    <value type="float" >0.023400000000000001</value>
                    <uncertainty type="Uncertainty" >
                     <precision type="int" >4</precision>
                     <uncertainty type="int" >18</uncertainty>
                    </uncertainty>
                   </item>
                   <item type="UncertainValue" >
                    <value type="float" >-0.0047000000000000002</value>
                    <uncertainty type="Uncertainty" >
                     <precision type="int" >4</precision>
                     <uncertainty type="int" >16</uncertainty>
                    </uncertainty>
                   </item>
                   <item type="UncertainValue" >
                    <value type="float" >-0.0067999999999999996</value>
                    <uncertainty type="Uncertainty" >
                     <precision type="int" >4</precision>
                     <uncertainty type="int" >15</uncertainty>
                    </uncertainty>
                   </item>
                   <item type="UncertainValue" >
                    <value type="float" >0.0044000000000000003</value>
                    <uncertainty type="Uncertainty" >
                     <precision type="int" >4</precision>
                     <uncertainty type="int" >15</uncertainty>
                    </uncertainty>
                   </item>
                  </uvalues>
                  <type type="AtomicDisplacementParameters::Type" >
                   <enumerator type="int" >0</enumerator>
                  </type>
                  <u_equivalent type="float" >0.026194391235606754</u_equivalent>
                 </value>
                </adps>
               </value>
              </site>
              <annotations type="Annotations" >
               <annotations type="Container" >
                <count type="int" >1</count>
                <item type="Handle" >
                 <serial_number type="int" >47</serial_number>
                 <value type="FileOrdering" >
                  <value type="Handle" >
                   <serial_number type="int" >48</serial_number>
                   <value type="FileOrdering" >
                    <file_order type="int" >6</file_order>
                   </value>
                  </value>
                 </value>
                </item>
               </annotations>
              </annotations>
             </value>
            </item>
            <item type="Handle" >
             <serial_number type="int" >49</serial_number>
             <value type="Atom3d" >
              <element type="Element" >
               <code type="char" >1</code>
              </element>
              <formal_charge type="int" >0</formal_charge>
              <radius type="float" >0.68000000000000005</radius>
              <label type="string" >C4</label>
              <site type="Handle" >
               <serial_number type="int" >50</serial_number>
               <value type="Site" >
                <orthogonal type="Point" >
                 <coordinates type="Vector" >
                  <vector type="Container" >
                   <count type="int" >3</count>
                   <item type="float" >0.42056334304899434</item>
                   <item type="float" >3.3176848800000003</item>
                   <item type="float" >4.9883496816053254</item>
                  </vector>
                 </coordinates>
                </orthogonal>
                <fractional type="Point" >
                 <coordinates type="Vector" >
                  <vector type="Container" >
                   <count type="int" >3</count>
                   <item type="float" >0.038100000000000002</item>
                   <item type="float" >0.44790000000000002</item>
                   <item type="float" >0.14990000000000001</item>
                  </vector>
                 </coordinates>
                </fractional>
                <uncertain_value type="UncertainValue" >
                 <value type="float" >1</value>
                 <uncertainty type="Uncertainty" >
                  <precision type="int" >0</precision>
                  <uncertainty type="int" >0</uncertainty>
                 </uncertainty>
                </uncertain_value>
                <uncertainty type="Handle" >
                 <serial_number type="int" >51</serial_number>
                 <value type="Container" >
                  <count type="int" >3</count>
                  <item type="Uncertainty" >
                   <precision type="int" >4</precision>
                   <uncertainty type="int" >2</uncertainty>
                  </item>
                  <item type="Uncertainty" >
                   <precision type="int" >4</precision>
                   <uncertainty type="int" >5</uncertainty>
                  </item>
                  <item type="Uncertainty" >
                   <precision type="int" >5</precision>
                   <uncertainty type="int" >9</uncertainty>
                  </item>
                 </value>
                </uncertainty>
                <adps type="Handle" >
                 <serial_number type="int" >52</serial_number>
                 <value type="AtomicDisplacementParameters" >
                  <uvalues type="Container" >
                   <count type="int" >6</count>
                   <item type="UncertainValue" >
                    <value type="float" >0.025000000000000001</value>
                    <uncertainty type="Uncertainty" >
                     <precision type="int" >3</precision>
                     <uncertainty type="int" >2</uncertainty>
                    </uncertainty>
                   </item>
                   <item type="UncertainValue" >
                    <value type="float" >0.040000000000000001</value>
                    <uncertainty type="Uncertainty" >
                     <precision type="int" >3</precision>
                     <uncertainty type="int" >2</uncertainty>
                    </uncertainty>
                   </item>
                   <item type="UncertainValue" >
                    <value type="float" >0.0247</value>
                    <uncertainty type="Uncertainty" >
                     <precision type="int" >4</precision>
                     <uncertainty type="int" >19</uncertainty>
                    </uncertainty>
                   </item>
                   <item type="UncertainValue" >
                    <value type="float" >-0.0047000000000000002</value>
                    <uncertainty type="Uncertainty" >
                     <precision type="int" >4</precision>
                     <uncertainty type="int" >17</uncertainty>
                    </uncertainty>
                   </item>
                   <item type="UncertainValue" >
                    <value type="float" >-0.0041000000000000003</value>
                    <uncertainty type="Uncertainty" >
                     <precision type="int" >4</precision>
                     <uncertainty type="int" >16</uncertainty>
                    </uncertainty>
                   </item>
                   <item type="UncertainValue" >
                    <value type="float" >0.0032000000000000002</value>
                    <uncertainty type="Uncertainty" >
                     <precision type="int" >4</precision>
                     <uncertainty type="int" >16</uncertainty>
                    </uncertainty>
                   </item>
                  </uvalues>
                  <type type="AtomicDisplacementParameters::Type" >
                   <enumerator type="int" >0</enumerator>
                  </type>
                  <u_equivalent type="float" >0.029981890676780528</u_equivalent>
                 </value>
                </adps>
               </value>
              </site>
              <annotations type="Annotations" >
               <annotations type="Container" >
                <count type="int" >1</count>
                <item type="Handle" >
                 <serial_number type="int" >53</serial_number>
                 <value type="FileOrdering" >
                  <value type="Handle" >
                   <serial_number type="int" >54</serial_number>
                   <value type="FileOrdering" >
                    <file_order type="int" >7</file_order>
                   </value>
                  </value>
                 </value>
                </item>
               </annotations>
              </annotations>
             </value>
            </item>
            <item type="Handle" >
             <serial_number type="int" >55</serial_number>
             <value type="Atom3d" >
              <element type="Element" >
               <code type="char" >2</code>
              </element>
              <formal_charge type="int" >0</formal_charge>
              <radius type="float" >0.23000000000000001</radius>
              <label type="string" >H4A</label>
              <site type="Handle" >
               <serial_number type="int" >56</serial_number>
               <value type="Site" >
                <orthogonal type="Point" >
                 <coordinates type="Vector" >
                  <vector type="Container" >
                   <count type="int" >3</count>
                   <item type="float" >0.59880206479471909</item>
                   <item type="float" >2.3732668800000005</item>
                   <item type="float" >5.1813612103132041</item>
                  </vector>
                 </coordinates>
                </orthogonal>
                <fractional type="Point" >
                 <coordinates type="Vector" >
                  <vector type="Container" >
                   <count type="int" >3</count>
                   <item type="float" >0.050799999999999998</item>
                   <item type="float" >0.32040000000000002</item>
                   <item type="float" >0.15570000000000001</item>
                  </vector>
                 </coordinates>
                </fractional>
                <uncertain_value type="UncertainValue" >
                 <value type="float" >1</value>
                 <uncertainty type="Uncertainty" >
                  <precision type="int" >0</precision>
                  <uncertainty type="int" >0</uncertainty>
                 </uncertainty>
                </uncertain_value>
                <uncertainty type="Handle" >
                 <serial_number type="int" >57</serial_number>
                 <value type="Container" >
                  <count type="int" >3</count>
                  <item type="Uncertainty" >
                   <precision type="int" >4</precision>
                   <uncertainty type="int" >0</uncertainty>
                  </item>
                  <item type="Uncertainty" >
                   <precision type="int" >4</precision>
                   <uncertainty type="int" >0</uncertainty>
                  </item>
                  <item type="Uncertainty" >
                   <precision type="int" >4</precision>
                   <uncertainty type="int" >0</uncertainty>
                  </item>
                 </value>
                </uncertainty>
                <adps type="Handle" >
                 <serial_number type="int" >58</serial_number>
                 <value type="AtomicDisplacementParameters" >
                  <uvalues type="Container" >
                   <count type="int" >6</count>
                   <item type="UncertainValue" >
                    <value type="float" >0.045000000000000012</value>
                    <uncertainty type="Uncertainty" >
                     <precision type="int" >1000000</precision>
                     <uncertainty type="int" >0</uncertainty>
                    </uncertainty>
                   </item>
                   <item type="UncertainValue" >
                    <value type="float" >0.045000000000000012</value>
                    <uncertainty type="Uncertainty" >
                     <precision type="int" >1000000</precision>
                     <uncertainty type="int" >0</uncertainty>
                    </uncertainty>
                   </item>
                   <item type="UncertainValue" >
                    <value type="float" >0.045000000000000012</value>
                    <uncertainty type="Uncertainty" >
                     <precision type="int" >1000000</precision>
                     <uncertainty type="int" >0</uncertainty>
                    </uncertainty>
                   </item>
                   <item type="UncertainValue" >
                    <value type="float" >-2.8277145750661393e-18</value>
                    <uncertainty type="Uncertainty" >
                     <precision type="int" >1000000</precision>
                     <uncertainty type="int" >0</uncertainty>
                    </uncertainty>
                   </item>
                   <item type="UncertainValue" >
                    <value type="float" >0.0011646154287394234</value>
                    <uncertainty type="Uncertainty" >
                     <precision type="int" >1000000</precision>
                     <uncertainty type="int" >0</uncertainty>
                    </uncertainty>
                   </item>
                   <item type="UncertainValue" >
                    <value type="float" >-2.82771457506614e-18</value>
                    <uncertainty type="Uncertainty" >
                     <precision type="int" >1000000</precision>
                     <uncertainty type="int" >0</uncertainty>
                    </uncertainty>
                   </item>
                  </uvalues>
                  <type type="AtomicDisplacementParameters::Type" >
                   <enumerator type="int" >1</enumerator>
                  </type>
                  <u_equivalent type="float" >0.044999999999999998</u_equivalent>
                 </value>
                </adps>
               </value>
              </site>
              <annotations type="Annotations" >
               <annotations type="Container" >
                <count type="int" >1</count>
                <item type="Handle" >
                 <serial_number type="int" >59</serial_number>
                 <value type="FileOrdering" >
                  <value type="Handle" >
                   <serial_number type="int" >60</serial_number>
                   <value type="FileOrdering" >
                    <file_order type="int" >8</file_order>
                   </value>
                  </value>
                 </value>
                </item>
               </annotations>
              </annotations>
             </value>
            </item>
            <item type="Handle" >
             <serial_number type="int" >61</serial_number>
             <value type="Atom3d" >
              <element type="Element" >
               <code type="char" >2</code>
              </element>
              <formal_charge type="int" >0</formal_charge>
              <radius type="float" >0.23000000000000001</radius>
              <label type="string" >H4B</label>
              <site type="Handle" >
               <serial_number type="int" >62</serial_number>
               <value type="Site" >
                <orthogonal type="Point" >
                 <coordinates type="Vector" >
                  <vector type="Container" >
                   <count type="int" >3</count>
                   <item type="float" >-0.4517940480928081</item>
                   <item type="float" >3.56730752</item>
                   <item type="float" >5.3577338141324713</item>
                  </vector>
                 </coordinates>
                </orthogonal>
                <fractional type="Point" >
                 <coordinates type="Vector" >
                  <vector type="Container" >
                   <count type="int" >3</count>
                   <item type="float" >-0.021700000000000001</item>
                   <item type="float" >0.48159999999999997</item>
                   <item type="float" >0.161</item>
                  </vector>
                 </coordinates>
                </fractional>
                <uncertain_value type="UncertainValue" >
                 <value type="float" >1</value>
                 <uncertainty type="Uncertainty" >
                  <precision type="int" >0</precision>
                  <uncertainty type="int" >0</uncertainty>
                 </uncertainty>
                </uncertain_value>
                <uncertainty type="Handle" >
                 <serial_number type="int" >63</serial_number>
                 <value type="Container" >
                  <count type="int" >3</count>
                  <item type="Uncertainty" >
                   <precision type="int" >4</precision>
                   <uncertainty type="int" >0</uncertainty>
                  </item>
                  <item type="Uncertainty" >
                   <precision type="int" >4</precision>
                   <uncertainty type="int" >0</uncertainty>
                  </item>
                  <item type="Uncertainty" >
                   <precision type="int" >4</precision>
                   <uncertainty type="int" >0</uncertainty>
                  </item>
                 </value>
                </uncertainty>
                <adps type="Handle" >
                 <serial_number type="int" >64</serial_number>
                 <value type="AtomicDisplacementParameters" >
                  <uvalues type="Container" >
                   <count type="int" >6</count>
                   <item type="UncertainValue" >
                    <value type="float" >0.045000000000000012</value>
                    <uncertainty type="Uncertainty" >
                     <precision type="int" >1000000</precision>
                     <uncertainty type="int" >0</uncertainty>
                    </uncertainty>
                   </item>
                   <item type="UncertainValue" >
                    <value type="float" >0.045000000000000012</value>
                    <uncertainty type="Uncertainty" >
                     <precision type="int" >1000000</precision>
                     <uncertainty type="int" >0</uncertainty>
                    </uncertainty>
                   </item>
                   <item type="UncertainValue" >
                    <value type="float" >0.045000000000000012</value>
                    <uncertainty type="Uncertainty" >
                     <precision type="int" >1000000</precision>
                     <uncertainty type="int" >0</uncertainty>
                    </uncertainty>
                   </item>
                   <item type="UncertainValue" >
                    <value type="float" >-2.8277145750661393e-18</value>
                    <uncertainty type="Uncertainty" >
                     <precision type="int" >1000000</precision>
                     <uncertainty type="int" >0</uncertainty>
                    </uncertainty>
                   </item>
                   <item type="UncertainValue" >
                    <value type="float" >0.0011646154287394234</value>
                    <uncertainty type="Uncertainty" >
                     <precision type="int" >1000000</precision>
                     <uncertainty type="int" >0</uncertainty>
                    </uncertainty>
                   </item>
                   <item type="UncertainValue" >
                    <value type="float" >-2.82771457506614e-18</value>
                    <uncertainty type="Uncertainty" >
                     <precision type="int" >1000000</precision>
                     <uncertainty type="int" >0</uncertainty>
                    </uncertainty>
                   </item>
                  </uvalues>
                  <type type="AtomicDisplacementParameters::Type" >
                   <enumerator type="int" >1</enumerator>
                  </type>
                  <u_equivalent type="float" >0.044999999999999998</u_equivalent>
                 </value>
                </adps>
               </value>
              </site>
              <annotations type="Annotations" >
               <annotations type="Container" >
                <count type="int" >1</count>
                <item type="Handle" >
                 <serial_number type="int" >65</serial_number>
                 <value type="FileOrdering" >
                  <value type="Handle" >
                   <serial_number type="int" >66</serial_number>
                   <value type="FileOrdering" >
                    <file_order type="int" >9</file_order>
                   </value>
                  </value>
                 </value>
                </item>
               </annotations>
              </annotations>
             </value>
            </item>
            <item type="Handle" >
             <serial_number type="int" >67</serial_number>
             <value type="Atom3d" >
              <element type="Element" >
               <code type="char" >2</code>
              </element>
              <formal_charge type="int" >0</formal_charge>
              <radius type="float" >0.23000000000000001</radius>
              <label type="string" >H4C</label>
              <site type="Handle" >
               <serial_number type="int" >68</serial_number>
               <value type="Site" >
                <orthogonal type="Point" >
                 <coordinates type="Vector" >
                  <vector type="Container" >
                   <count type="int" >3</count>
                   <item type="float" >1.1184674681003468</item>
                   <item type="float" >3.8724841600000004</item>
                   <item type="float" >5.394339448887413</item>
                  </vector>
                 </coordinates>
                </orthogonal>
                <fractional type="Point" >
                 <coordinates type="Vector" >
                  <vector type="Container" >
                   <count type="int" >3</count>
                   <item type="float" >0.0872</item>
                   <item type="float" >0.52280000000000004</item>
                   <item type="float" >0.16209999999999999</item>
                  </vector>
                 </coordinates>
                </fractional>
                <uncertain_value type="UncertainValue" >
                 <value type="float" >1</value>
                 <uncertainty type="Uncertainty" >
                  <precision type="int" >0</precision>
                  <uncertainty type="int" >0</uncertainty>
                 </uncertainty>
                </uncertain_value>
                <uncertainty type="Handle" >
                 <serial_number type="int" >69</serial_number>
                 <value type="Container" >
                  <count type="int" >3</count>
                  <item type="Uncertainty" >
                   <precision type="int" >4</precision>
                   <uncertainty type="int" >0</uncertainty>
                  </item>
                  <item type="Uncertainty" >
                   <precision type="int" >4</precision>
                   <uncertainty type="int" >0</uncertainty>
                  </item>
                  <item type="Uncertainty" >
                   <precision type="int" >4</precision>
                   <uncertainty type="int" >0</uncertainty>
                  </item>
                 </value>
                </uncertainty>
                <adps type="Handle" >
                 <serial_number type="int" >70</serial_number>
                 <value type="AtomicDisplacementParameters" >
                  <uvalues type="Container" >
                   <count type="int" >6</count>
                   <item type="UncertainValue" >
                    <value type="float" >0.045000000000000012</value>
                    <uncertainty type="Uncertainty" >
                     <precision type="int" >1000000</precision>
                     <uncertainty type="int" >0</uncertainty>
                    </uncertainty>
                   </item>
                   <item type="UncertainValue" >
                    <value type="float" >0.045000000000000012</value>
                    <uncertainty type="Uncertainty" >
                     <precision type="int" >1000000</precision>
                     <uncertainty type="int" >0</uncertainty>
                    </uncertainty>
                   </item>
                   <item type="UncertainValue" >
                    <value type="float" >0.045000000000000012</value>
                    <uncertainty type="Uncertainty" >
                     <precision type="int" >1000000</precision>
                     <uncertainty type="int" >0</uncertainty>
                    </uncertainty>
                   </item>
                   <item type="UncertainValue" >
                    <value type="float" >-2.8277145750661393e-18</value>
                    <uncertainty type="Uncertainty" >
                     <precision type="int" >1000000</precision>
                     <uncertainty type="int" >0</uncertainty>
                    </uncertainty>
                   </item>
                   <item type="UncertainValue" >
                    <value type="float" >0.0011646154287394234</value>
                    <uncertainty type="Uncertainty" >
                     <precision type="int" >1000000</precision>
                     <uncertainty type="int" >0</uncertainty>
                    </uncertainty>
                   </item>
                   <item type="UncertainValue" >
                    <value type="float" >-2.82771457506614e-18</value>
                    <uncertainty type="Uncertainty" >
                     <precision type="int" >1000000</precision>
                     <uncertainty type="int" >0</uncertainty>
                    </uncertainty>
                   </item>
                  </uvalues>
                  <type type="AtomicDisplacementParameters::Type" >
                   <enumerator type="int" >1</enumerator>
                  </type>
                  <u_equivalent type="float" >0.044999999999999998</u_equivalent>
                 </value>
                </adps>
               </value>
              </site>
              <annotations type="Annotations" >
               <annotations type="Container" >
                <count type="int" >1</count>
                <item type="Handle" >
                 <serial_number type="int" >71</serial_number>
                 <value type="FileOrdering" >
                  <value type="Handle" >
                   <serial_number type="int" >72</serial_number>
                   <value type="FileOrdering" >
                    <file_order type="int" >10</file_order>
                   </value>
                  </value>
                 </value>
                </item>
               </annotations>
              </annotations>
             </value>
            </item>
            <item type="Handle" >
             <serial_number type="int" >73</serial_number>
             <value type="Atom3d" >
              <element type="Element" >
               <code type="char" >1</code>
              </element>
              <formal_charge type="int" >0</formal_charge>
              <radius type="float" >0.68000000000000005</radius>
              <label type="string" >C5</label>
              <site type="Handle" >
               <serial_number type="int" >74</serial_number>
               <value type="Site" >
                <orthogonal type="Point" >
                 <coordinates type="Vector" >
                  <vector type="Container" >
                   <count type="int" >3</count>
                   <item type="float" >0.29906239562524345</item>
                   <item type="float" >5.02356304</item>
                   <item type="float" >3.1610629503381582</item>
                  </vector>
                 </coordinates>
                </orthogonal>
                <fractional type="Point" >
                 <coordinates type="Vector" >
                  <vector type="Container" >
                   <count type="int" >3</count>
                   <item type="float" >0.0264</item>
                   <item type="float" >0.67820000000000003</item>
                   <item type="float" >0.094990000000000005</item>
                  </vector>
                 </coordinates>
                </fractional>
                <uncertain_value type="UncertainValue" >
                 <value type="float" >1</value>
                 <uncertainty type="Uncertainty" >
                  <precision type="int" >0</precision>
                  <uncertainty type="int" >0</uncertainty>
                 </uncertainty>
                </uncertain_value>
                <uncertainty type="Handle" >
                 <serial_number type="int" >75</serial_number>
                 <value type="Container" >
                  <count type="int" >3</count>
                  <item type="Uncertainty" >
                   <precision type="int" >4</precision>
                   <uncertainty type="int" >2</uncertainty>
                  </item>
                  <item type="Uncertainty" >
                   <precision type="int" >4</precision>
                   <uncertainty type="int" >4</uncertainty>
                  </item>
                  <item type="Uncertainty" >
                   <precision type="int" >5</precision>
                   <uncertainty type="int" >10</uncertainty>
                  </item>
                 </value>
                </uncertainty>
                <adps type="Handle" >
                 <serial_number type="int" >76</serial_number>
                 <value type="AtomicDisplacementParameters" >
                  <uvalues type="Container" >
                   <count type="int" >6</count>
                   <item type="UncertainValue" >
                    <value type="float" >0.029999999999999999</value>
                    <uncertainty type="Uncertainty" >
                     <precision type="int" >3</precision>
                     <uncertainty type="int" >2</uncertainty>
                    </uncertainty>
                   </item>
                   <item type="UncertainValue" >
                    <value type="float" >0.034000000000000002</value>
                    <uncertainty type="Uncertainty" >
                     <precision type="int" >3</precision>
                     <uncertainty type="int" >2</uncertainty>
                    </uncertainty>
                   </item>
                   <item type="UncertainValue" >
                    <value type="float" >0.032000000000000001</value>
                    <uncertainty type="Uncertainty" >
                     <precision type="int" >3</precision>
                     <uncertainty type="int" >2</uncertainty>
                    </uncertainty>
                   </item>
                   <item type="UncertainValue" >
                    <value type="float" >-0.0014</value>
                    <uncertainty type="Uncertainty" >
                     <precision type="int" >4</precision>
                     <uncertainty type="int" >18</uncertainty>
                    </uncertainty>
                   </item>
                   <item type="UncertainValue" >
                    <value type="float" >-0.0071999999999999998</value>
                    <uncertainty type="Uncertainty" >
                     <precision type="int" >4</precision>
                     <uncertainty type="int" >17</uncertainty>
                    </uncertainty>
                   </item>
                   <item type="UncertainValue" >
                    <value type="float" >0.001</value>
                    <uncertainty type="Uncertainty" >
                     <precision type="int" >4</precision>
                     <uncertainty type="int" >17</uncertainty>
                    </uncertainty>
                   </item>
                  </uvalues>
                  <type type="AtomicDisplacementParameters::Type" >
                   <enumerator type="int" >0</enumerator>
                  </type>
                  <u_equivalent type="float" >0.032138160555616989</u_equivalent>
                 </value>
                </adps>
               </value>
              </site>
              <annotations type="Annotations" >
               <annotations type="Container" >
                <count type="int" >1</count>
                <item type="Handle" >
                 <serial_number type="int" >77</serial_number>
                 <value type="FileOrdering" >
                  <value type="Handle" >
                   <serial_number type="int" >78</serial_number>
                   <value type="FileOrdering" >
                    <file_order type="int" >11</file_order>
                   </value>
                  </value>
                 </value>
                </item>
               </annotations>
              </annotations>
             </value>
            </item>
            <item type="Handle" >
             <serial_number type="int" >79</serial_number>
             <value type="Atom3d" >
              <element type="Element" >
               <code type="char" >2</code>
              </element>
              <formal_charge type="int" >0</formal_charge>
              <radius type="float" >0.23000000000000001</radius>
              <label type="string" >H5A</label>
              <site type="Handle" >
               <serial_number type="int" >80</serial_number>
               <value type="Site" >
                <orthogonal type="Point" >
                 <coordinates type="Vector" >
                  <vector type="Container" >
                   <count type="int" >3</count>
                   <item type="float" >1.1047807444963986</item>
                   <item type="float" >5.4879944799999993</item>
                   <item type="float" >3.4708797317640792</item>
                  </vector>
                 </coordinates>
                </orthogonal>
                <fractional type="Point" >
                 <coordinates type="Vector" >
                  <vector type="Container" >
                   <count type="int" >3</count>
                   <item type="float" >0.082799999999999999</item>
                   <item type="float" >0.7409</item>
                   <item type="float" >0.1043</item>
                  </vector>
                 </coordinates>
                </fractional>
                <uncertain_value type="UncertainValue" >
                 <value type="float" >1</value>
                 <uncertainty type="Uncertainty" >
                  <precision type="int" >0</precision>
                  <uncertainty type="int" >0</uncertainty>
                 </uncertainty>
                </uncertain_value>
                <uncertainty type="Handle" >
                 <serial_number type="int" >81</serial_number>
                 <value type="Container" >
                  <count type="int" >3</count>
                  <item type="Uncertainty" >
                   <precision type="int" >4</precision>
                   <uncertainty type="int" >0</uncertainty>
                  </item>
                  <item type="Uncertainty" >
                   <precision type="int" >4</precision>
                   <uncertainty type="int" >0</uncertainty>
                  </item>
                  <item type="Uncertainty" >
                   <precision type="int" >4</precision>
                   <uncertainty type="int" >0</uncertainty>
                  </item>
                 </value>
                </uncertainty>
                <adps type="Handle" >
                 <serial_number type="int" >82</serial_number>
                 <value type="AtomicDisplacementParameters" >
                  <uvalues type="Container" >
                   <count type="int" >6</count>
                   <item type="UncertainValue" >
                    <value type="float" >0.048000000000000015</value>
                    <uncertainty type="Uncertainty" >
                     <precision type="int" >1000000</precision>
                     <uncertainty type="int" >0</uncertainty>
                    </uncertainty>
                   </item>
                   <item type="UncertainValue" >
                    <value type="float" >0.048000000000000022</value>
                    <uncertainty type="Uncertainty" >
                     <precision type="int" >1000000</precision>
                     <uncertainty type="int" >0</uncertainty>
                    </uncertainty>
                   </item>
                   <item type="UncertainValue" >
                    <value type="float" >0.048000000000000015</value>
                    <uncertainty type="Uncertainty" >
                     <precision type="int" >1000000</precision>
                     <uncertainty type="int" >0</uncertainty>
                    </uncertainty>
                   </item>
                   <item type="UncertainValue" >
                    <value type="float" >-3.0162288800705484e-18</value>
                    <uncertainty type="Uncertainty" >
                     <precision type="int" >1000000</precision>
                     <uncertainty type="int" >0</uncertainty>
                    </uncertainty>
                   </item>
                   <item type="UncertainValue" >
                    <value type="float" >0.0012422564573220517</value>
                    <uncertainty type="Uncertainty" >
                     <precision type="int" >1000000</precision>
                     <uncertainty type="int" >0</uncertainty>
                    </uncertainty>
                   </item>
                   <item type="UncertainValue" >
                    <value type="float" >-3.0162288800705496e-18</value>
                    <uncertainty type="Uncertainty" >
                     <precision type="int" >1000000</precision>
                     <uncertainty type="int" >0</uncertainty>
                    </uncertainty>
                   </item>
                  </uvalues>
                  <type type="AtomicDisplacementParameters::Type" >
                   <enumerator type="int" >1</enumerator>
                  </type>
                  <u_equivalent type="float" >0.048000000000000001</u_equivalent>
                 </value>
                </adps>
               </value>
              </site>
              <annotations type="Annotations" >
               <annotations type="Container" >
                <count type="int" >1</count>
                <item type="Handle" >
                 <serial_number type="int" >83</serial_number>
                 <value type="FileOrdering" >
                  <value type="Handle" >
                   <serial_number type="int" >84</serial_number>
                   <value type="FileOrdering" >
                    <file_order type="int" >12</file_order>
                   </value>
                  </value>
                 </value>
                </item>
               </annotations>
              </annotations>
             </value>
            </item>
            <item type="Handle" >
             <serial_number type="int" >85</serial_number>
             <value type="Atom3d" >
              <element type="Element" >
               <code type="char" >2</code>
              </element>
              <formal_charge type="int" >0</formal_charge>
              <radius type="float" >0.23000000000000001</radius>
              <label type="string" >H5B</label>
              <site type="Handle" >
               <serial_number type="int" >86</serial_number>
               <value type="Site" >
                <orthogonal type="Point" >
                 <coordinates type="Vector" >
                  <vector type="Container" >
                   <count type="int" >3</count>
                   <item type="float" >-0.48591768458428353</item>
                   <item type="float" >5.3983673599999999</item>
                   <item type="float" >3.6106467008284047</item>
                  </vector>
                 </coordinates>
                </orthogonal>
                <fractional type="Point" >
                 <coordinates type="Vector" >
                  <vector type="Container" >
                   <count type="int" >3</count>
                   <item type="float" >-0.027199999999999998</item>
                   <item type="float" >0.7288</item>
                   <item type="float" >0.1085</item>
                  </vector>
                 </coordinates>
                </fractional>
                <uncertain_value type="UncertainValue" >
                 <value type="float" >1</value>
                 <uncertainty type="Uncertainty" >
                  <precision type="int" >0</precision>
                  <uncertainty type="int" >0</uncertainty>
                 </uncertainty>
                </uncertain_value>
                <uncertainty type="Handle" >
                 <serial_number type="int" >87</serial_number>
                 <value type="Container" >
                  <count type="int" >3</count>
                  <item type="Uncertainty" >
                   <precision type="int" >4</precision>
                   <uncertainty type="int" >0</uncertainty>
                  </item>
                  <item type="Uncertainty" >
                   <precision type="int" >4</precision>
                   <uncertainty type="int" >0</uncertainty>
                  </item>
                  <item type="Uncertainty" >
                   <precision type="int" >4</precision>
                   <uncertainty type="int" >0</uncertainty>
                  </item>
                 </value>
                </uncertainty>
                <adps type="Handle" >
                 <serial_number type="int" >88</serial_number>
                 <value type="AtomicDisplacementParameters" >
                  <uvalues type="Container" >
                   <count type="int" >6</count>
                   <item type="UncertainValue" >
                    <value type="float" >0.048000000000000015</value>
                    <uncertainty type="Uncertainty" >
                     <precision type="int" >1000000</precision>
                     <uncertainty type="int" >0</uncertainty>
                    </uncertainty>
                   </item>
                   <item type="UncertainValue" >
                    <value type="float" >0.048000000000000022</value>
                    <uncertainty type="Uncertainty" >
                     <precision type="int" >1000000</precision>
                     <uncertainty type="int" >0</uncertainty>
                    </uncertainty>
                   </item>
                   <item type="UncertainValue" >
                    <value type="float" >0.048000000000000015</value>
                    <uncertainty type="Uncertainty" >
                     <precision type="int" >1000000</precision>
                     <uncertainty type="int" >0</uncertainty>
                    </uncertainty>
                   </item>
                   <item type="UncertainValue" >
                    <value type="float" >-3.0162288800705484e-18</value>
                    <uncertainty type="Uncertainty" >
                     <precision type="int" >1000000</precision>
                     <uncertainty type="int" >0</uncertainty>
                    </uncertainty>
                   </item>
                   <item type="UncertainValue" >
                    <value type="float" >0.0012422564573220517</value>
                    <uncertainty type="Uncertainty" >
                     <precision type="int" >1000000</precision>
                     <uncertainty type="int" >0</uncertainty>
                    </uncertainty>
                   </item>
                   <item type="UncertainValue" >
                    <value type="float" >-3.0162288800705496e-18</value>
                    <uncertainty type="Uncertainty" >
                     <precision type="int" >1000000</precision>
                     <uncertainty type="int" >0</uncertainty>
                    </uncertainty>
                   </item>
                  </uvalues>
                  <type type="AtomicDisplacementParameters::Type" >
                   <enumerator type="int" >1</enumerator>
                  </type>
                  <u_equivalent type="float" >0.048000000000000001</u_equivalent>
                 </value>
                </adps>
               </value>
              </site>
              <annotations type="Annotations" >
               <annotations type="Container" >
                <count type="int" >1</count>
                <item type="Handle" >
                 <serial_number type="int" >89</serial_number>
                 <value type="FileOrdering" >
                  <value type="Handle" >
                   <serial_number type="int" >90</serial_number>
                   <value type="FileOrdering" >
                    <file_order type="int" >13</file_order>
                   </value>
                  </value>
                 </value>
                </item>
               </annotations>
              </annotations>
             </value>
            </item>
            <item type="Handle" >
             <serial_number type="int" >91</serial_number>
             <value type="Atom3d" >
              <element type="Element" >
               <code type="char" >2</code>
              </element>
              <formal_charge type="int" >0</formal_charge>
              <radius type="float" >0.23000000000000001</radius>
              <label type="string" >H5C</label>
              <site type="Handle" >
               <serial_number type="int" >92</serial_number>
               <value type="Site" >
                <orthogonal type="Point" >
                 <coordinates type="Vector" >
                  <vector type="Container" >
                   <count type="int" >3</count>
                   <item type="float" >0.20725752466263347</item>
                   <item type="float" >5.1391153599999999</item>
                   <item type="float" >2.1930103003188188</item>
                  </vector>
                 </coordinates>
                </orthogonal>
                <fractional type="Point" >
                 <coordinates type="Vector" >
                  <vector type="Container" >
                   <count type="int" >3</count>
                   <item type="float" >0.0183</item>
                   <item type="float" >0.69379999999999997</item>
                   <item type="float" >0.0659</item>
                  </vector>
                 </coordinates>
                </fractional>
                <uncertain_value type="UncertainValue" >
                 <value type="float" >1</value>
                 <uncertainty type="Uncertainty" >
                  <precision type="int" >0</precision>
                  <uncertainty type="int" >0</uncertainty>
                 </uncertainty>
                </uncertain_value>
                <uncertainty type="Handle" >
                 <serial_number type="int" >93</serial_number>
                 <value type="Container" >
                  <count type="int" >3</count>
                  <item type="Uncertainty" >
                   <precision type="int" >4</precision>
                   <uncertainty type="int" >0</uncertainty>
                  </item>
                  <item type="Uncertainty" >
                   <precision type="int" >4</precision>
                   <uncertainty type="int" >0</uncertainty>
                  </item>
                  <item type="Uncertainty" >
                   <precision type="int" >4</precision>
                   <uncertainty type="int" >0</uncertainty>
                  </item>
                 </value>
                </uncertainty>
                <adps type="Handle" >
                 <serial_number type="int" >94</serial_number>
                 <value type="AtomicDisplacementParameters" >
                  <uvalues type="Container" >
                   <count type="int" >6</count>
                   <item type="UncertainValue" >
                    <value type="float" >0.048000000000000015</value>
                    <uncertainty type="Uncertainty" >
                     <precision type="int" >1000000</precision>
                     <uncertainty type="int" >0</uncertainty>
                    </uncertainty>
                   </item>
                   <item type="UncertainValue" >
                    <value type="float" >0.048000000000000022</value>
                    <uncertainty type="Uncertainty" >
                     <precision type="int" >1000000</precision>
                     <uncertainty type="int" >0</uncertainty>
                    </uncertainty>
                   </item>
                   <item type="UncertainValue" >
                    <value type="float" >0.048000000000000015</value>
                    <uncertainty type="Uncertainty" >
                     <precision type="int" >1000000</precision>
                     <uncertainty type="int" >0</uncertainty>
                    </uncertainty>
                   </item>
                   <item type="UncertainValue" >
                    <value type="float" >-3.0162288800705484e-18</value>
                    <uncertainty type="Uncertainty" >
                     <precision type="int" >1000000</precision>
                     <uncertainty type="int" >0</uncertainty>
                    </uncertainty>
                   </item>
                   <item type="UncertainValue" >
                    <value type="float" >0.0012422564573220517</value>
                    <uncertainty type="Uncertainty" >
                     <precision type="int" >1000000</precision>
                     <uncertainty type="int" >0</uncertainty>
                    </uncertainty>
                   </item>
                   <item type="UncertainValue" >
                    <value type="float" >-3.0162288800705496e-18</value>
                    <uncertainty type="Uncertainty" >
                     <precision type="int" >1000000</precision>
                     <uncertainty type="int" >0</uncertainty>
                    </uncertainty>
                   </item>
                  </uvalues>
                  <type type="AtomicDisplacementParameters::Type" >
                   <enumerator type="int" >1</enumerator>
                  </type>
                  <u_equivalent type="float" >0.048000000000000001</u_equivalent>
                 </value>
                </adps>
               </value>
              </site>
              <annotations type="Annotations" >
               <annotations type="Container" >
                <count type="int" >1</count>
                <item type="Handle" >
                 <serial_number type="int" >95</serial_number>
                 <value type="FileOrdering" >
                  <value type="Handle" >
                   <serial_number type="int" >96</serial_number>
                   <value type="FileOrdering" >
                    <file_order type="int" >14</file_order>
                   </value>
                  </value>
                 </value>
                </item>
               </annotations>
              </annotations>
             </value>
            </item>
            <item type="Handle" >
             <serial_number type="int" >97</serial_number>
             <value type="Atom3d" >
              <element type="Element" >
               <code type="char" >1</code>
              </element>
              <formal_charge type="int" >0</formal_charge>
              <radius type="float" >0.68000000000000005</radius>
              <label type="string" >C6</label>
              <site type="Handle" >
               <serial_number type="int" >98</serial_number>
               <value type="Site" >
                <orthogonal type="Point" >
                 <coordinates type="Vector" >
                  <vector type="Container" >
                   <count type="int" >3</count>
                   <item type="float" >-1.9489632968561872</item>
                   <item type="float" >3.2732416799999999</item>
                   <item type="float" >2.497835404278157</item>
                  </vector>
                 </coordinates>
                </orthogonal>
                <fractional type="Point" >
                 <coordinates type="Vector" >
                  <vector type="Container" >
                   <count type="int" >3</count>
                   <item type="float" >-0.13059999999999999</item>
                   <item type="float" >0.44190000000000002</item>
                   <item type="float" >0.075060000000000002</item>
                  </vector>
                 </coordinates>
                </fractional>
                <uncertain_value type="UncertainValue" >
                 <value type="float" >1</value>
                 <uncertainty type="Uncertainty" >
                  <precision type="int" >0</precision>
                  <uncertainty type="int" >0</uncertainty>
                 </uncertainty>
                </uncertain_value>
                <uncertainty type="Handle" >
                 <serial_number type="int" >99</serial_number>
                 <value type="Container" >
                  <count type="int" >3</count>
                  <item type="Uncertainty" >
                   <precision type="int" >4</precision>
                   <uncertainty type="int" >2</uncertainty>
                  </item>
                  <item type="Uncertainty" >
                   <precision type="int" >4</precision>
                   <uncertainty type="int" >5</uncertainty>
                  </item>
                  <item type="Uncertainty" >
                   <precision type="int" >5</precision>
                   <uncertainty type="int" >10</uncertainty>
                  </item>
                 </value>
                </uncertainty>
                <adps type="Handle" >
                 <serial_number type="int" >100</serial_number>
                 <value type="AtomicDisplacementParameters" >
                  <uvalues type="Container" >
                   <count type="int" >6</count>
                   <item type="UncertainValue" >
                    <value type="float" >0.028000000000000001</value>
                    <uncertainty type="Uncertainty" >
                     <precision type="int" >3</precision>
                     <uncertainty type="int" >2</uncertainty>
                    </uncertainty>
                   </item>
                   <item type="UncertainValue" >
                    <value type="float" >0.040000000000000001</value>
                    <uncertainty type="Uncertainty" >
                     <precision type="int" >3</precision>
                     <uncertainty type="int" >2</uncertainty>
                    </uncertainty>
                   </item>
                   <item type="UncertainValue" >
                    <value type="float" >0.032000000000000001</value>
                    <uncertainty type="Uncertainty" >
                     <precision type="int" >3</precision>
                     <uncertainty type="int" >2</uncertainty>
                    </uncertainty>
                   </item>
                   <item type="UncertainValue" >
                    <value type="float" >-0.00089999999999999998</value>
                    <uncertainty type="Uncertainty" >
                     <precision type="int" >4</precision>
                     <uncertainty type="int" >18</uncertainty>
                    </uncertainty>
                   </item>
                   <item type="UncertainValue" >
                    <value type="float" >-0.0070000000000000001</value>
                    <uncertainty type="Uncertainty" >
                     <precision type="int" >4</precision>
                     <uncertainty type="int" >17</uncertainty>
                    </uncertainty>
                   </item>
                   <item type="UncertainValue" >
                    <value type="float" >0.00040000000000000002</value>
                    <uncertainty type="Uncertainty" >
                     <precision type="int" >4</precision>
                     <uncertainty type="int" >17</uncertainty>
                    </uncertainty>
                   </item>
                  </uvalues>
                  <type type="AtomicDisplacementParameters::Type" >
                   <enumerator type="int" >0</enumerator>
                  </type>
                  <u_equivalent type="float" >0.033467594036380513</u_equivalent>
                 </value>
                </adps>
               </value>
              </site>
              <annotations type="Annotations" >
               <annotations type="Container" >
                <count type="int" >1</count>
                <item type="Handle" >
                 <serial_number type="int" >101</serial_number>
                 <value type="FileOrdering" >
                  <value type="Handle" >
                   <serial_number type="int" >102</serial_number>
                   <value type="FileOrdering" >
                    <file_order type="int" >15</file_order>
                   </value>
                  </value>
                 </value>
                </item>
               </annotations>
              </annotations>
             </value>
            </item>
            <item type="Handle" >
             <serial_number type="int" >103</serial_number>
             <value type="Atom3d" >
              <element type="Element" >
               <code type="char" >2</code>
              </element>
              <formal_charge type="int" >0</formal_charge>
              <radius type="float" >0.23000000000000001</radius>
              <label type="string" >H6A</label>
              <site type="Handle" >
               <serial_number type="int" >104</serial_number>
               <value type="Site" >
                <orthogonal type="Point" >
                 <coordinates type="Vector" >
                  <vector type="Container" >
                   <count type="int" >3</count>
                   <item type="float" >-1.8562256808899369</item>
                   <item type="float" >4.1317361599999991</item>
                   <item type="float" >2.0366044063658832</item>
                  </vector>
                 </coordinates>
                </orthogonal>
                <fractional type="Point" >
                 <coordinates type="Vector" >
                  <vector type="Container" >
                   <count type="int" >3</count>
                   <item type="float" >-0.125</item>
                   <item type="float" >0.55779999999999996</item>
                   <item type="float" >0.061199999999999997</item>
                  </vector>
                 </coordinates>
                </fractional>
                <uncertain_value type="UncertainValue" >
                 <value type="float" >1</value>
                 <uncertainty type="Uncertainty" >
                  <precision type="int" >0</precision>
                  <uncertainty type="int" >0</uncertainty>
                 </uncertainty>
                </uncertain_value>
                <uncertainty type="Handle" >
                 <serial_number type="int" >105</serial_number>
                 <value type="Container" >
                  <count type="int" >3</count>
                  <item type="Uncertainty" >
                   <precision type="int" >4</precision>
                   <uncertainty type="int" >0</uncertainty>
                  </item>
                  <item type="Uncertainty" >
                   <precision type="int" >4</precision>
                   <uncertainty type="int" >0</uncertainty>
                  </item>
                  <item type="Uncertainty" >
                   <precision type="int" >4</precision>
                   <uncertainty type="int" >0</uncertainty>
                  </item>
                 </value>
                </uncertainty>
                <adps type="Handle" >
                 <serial_number type="int" >106</serial_number>
                 <value type="AtomicDisplacementParameters" >
                  <uvalues type="Container" >
                   <count type="int" >6</count>
                   <item type="UncertainValue" >
                    <value type="float" >0.050000000000000017</value>
                    <uncertainty type="Uncertainty" >
                     <precision type="int" >1000000</precision>
                     <uncertainty type="int" >0</uncertainty>
                    </uncertainty>
                   </item>
                   <item type="UncertainValue" >
                    <value type="float" >0.050000000000000024</value>
                    <uncertainty type="Uncertainty" >
                     <precision type="int" >1000000</precision>
                     <uncertainty type="int" >0</uncertainty>
                    </uncertainty>
                   </item>
                   <item type="UncertainValue" >
                    <value type="float" >0.050000000000000017</value>
                    <uncertainty type="Uncertainty" >
                     <precision type="int" >1000000</precision>
                     <uncertainty type="int" >0</uncertainty>
                    </uncertainty>
                   </item>
                   <item type="UncertainValue" >
                    <value type="float" >-3.1419050834068217e-18</value>
                    <uncertainty type="Uncertainty" >
                     <precision type="int" >1000000</precision>
                     <uncertainty type="int" >0</uncertainty>
                    </uncertainty>
                   </item>
                   <item type="UncertainValue" >
                    <value type="float" >0.0012940171430438038</value>
                    <uncertainty type="Uncertainty" >
                     <precision type="int" >1000000</precision>
                     <uncertainty type="int" >0</uncertainty>
                    </uncertainty>
                   </item>
                   <item type="UncertainValue" >
                    <value type="float" >-3.1419050834068225e-18</value>
                    <uncertainty type="Uncertainty" >
                     <precision type="int" >1000000</precision>
                     <uncertainty type="int" >0</uncertainty>
                    </uncertainty>
                   </item>
                  </uvalues>
                  <type type="AtomicDisplacementParameters::Type" >
                   <enumerator type="int" >1</enumerator>
                  </type>
                  <u_equivalent type="float" >0.050000000000000003</u_equivalent>
                 </value>
                </adps>
               </value>
              </site>
              <annotations type="Annotations" >
               <annotations type="Container" >
                <count type="int" >1</count>
                <item type="Handle" >
                 <serial_number type="int" >107</serial_number>
                 <value type="FileOrdering" >
                  <value type="Handle" >
                   <serial_number type="int" >108</serial_number>
                   <value type="FileOrdering" >
                    <file_order type="int" >16</file_order>
                   </value>
                  </value>
                 </value>
                </item>
               </annotations>
              </annotations>
             </value>
            </item>
            <item type="Handle" >
             <serial_number type="int" >109</serial_number>
             <value type="Atom3d" >
              <element type="Element" >
               <code type="char" >2</code>
              </element>
              <formal_charge type="int" >0</formal_charge>
              <radius type="float" >0.23000000000000001</radius>
              <label type="string" >H6B</label>
              <site type="Handle" >
               <serial_number type="int" >110</serial_number>
               <value type="Site" >
                <orthogonal type="Point" >
                 <coordinates type="Vector" >
                  <vector type="Container" >
                   <count type="int" >3</count>
                   <item type="float" >-2.3797961102297656</item>
                   <item type="float" >3.4147192</item>
                   <item type="float" >3.3677183974546963</item>
                  </vector>
                 </coordinates>
                </orthogonal>
                <fractional type="Point" >
                 <coordinates type="Vector" >
                  <vector type="Container" >
                   <count type="int" >3</count>
                   <item type="float" >-0.15890000000000001</item>
                   <item type="float" >0.46100000000000002</item>
                   <item type="float" >0.1012</item>
                  </vector>
                 </coordinates>
                </fractional>
                <uncertain_value type="UncertainValue" >
                 <value type="float" >1</value>
                 <uncertainty type="Uncertainty" >
                  <precision type="int" >0</precision>
                  <uncertainty type="int" >0</uncertainty>
                 </uncertainty>
                </uncertain_value>
                <uncertainty type="Handle" >
                 <serial_number type="int" >111</serial_number>
                 <value type="Container" >
                  <count type="int" >3</count>
                  <item type="Uncertainty" >
                   <precision type="int" >4</precision>
                   <uncertainty type="int" >0</uncertainty>
                  </item>
                  <item type="Uncertainty" >
                   <precision type="int" >4</precision>
                   <uncertainty type="int" >0</uncertainty>
                  </item>
                  <item type="Uncertainty" >
                   <precision type="int" >4</precision>
                   <uncertainty type="int" >0</uncertainty>
                  </item>
                 </value>
                </uncertainty>
                <adps type="Handle" >
                 <serial_number type="int" >112</serial_number>
                 <value type="AtomicDisplacementParameters" >
                  <uvalues type="Container" >
                   <count type="int" >6</count>
                   <item type="UncertainValue" >
                    <value type="float" >0.050000000000000017</value>
                    <uncertainty type="Uncertainty" >
                     <precision type="int" >1000000</precision>
                     <uncertainty type="int" >0</uncertainty>
                    </uncertainty>
                   </item>
                   <item type="UncertainValue" >
                    <value type="float" >0.050000000000000024</value>
                    <uncertainty type="Uncertainty" >
                     <precision type="int" >1000000</precision>
                     <uncertainty type="int" >0</uncertainty>
                    </uncertainty>
                   </item>
                   <item type="UncertainValue" >
                    <value type="float" >0.050000000000000017</value>
                    <uncertainty type="Uncertainty" >
                     <precision type="int" >1000000</precision>
                     <uncertainty type="int" >0</uncertainty>
                    </uncertainty>
                   </item>
                   <item type="UncertainValue" >
                    <value type="float" >-3.1419050834068217e-18</value>
                    <uncertainty type="Uncertainty" >
                     <precision type="int" >1000000</precision>
                     <uncertainty type="int" >0</uncertainty>
                    </uncertainty>
                   </item>
                   <item type="UncertainValue" >
                    <value type="float" >0.0012940171430438038</value>
                    <uncertainty type="Uncertainty" >
                     <precision type="int" >1000000</precision>
                     <uncertainty type="int" >0</uncertainty>
                    </uncertainty>
                   </item>
                   <item type="UncertainValue" >
                    <value type="float" >-3.1419050834068225e-18</value>
                    <uncertainty type="Uncertainty" >
                     <precision type="int" >1000000</precision>
                     <uncertainty type="int" >0</uncertainty>
                    </uncertainty>
                   </item>
                  </uvalues>
                  <type type="AtomicDisplacementParameters::Type" >
                   <enumerator type="int" >1</enumerator>
                  </type>
                  <u_equivalent type="float" >0.050000000000000003</u_equivalent>
                 </value>
                </adps>
               </value>
              </site>
              <annotations type="Annotations" >
               <annotations type="Container" >
                <count type="int" >1</count>
                <item type="Handle" >
                 <serial_number type="int" >113</serial_number>
                 <value type="FileOrdering" >
                  <value type="Handle" >
                   <serial_number type="int" >114</serial_number>
                   <value type="FileOrdering" >
                    <file_order type="int" >17</file_order>
                   </value>
                  </value>
                 </value>
                </item>
               </annotations>
              </annotations>
             </value>
            </item>
            <item type="Handle" >
             <serial_number type="int" >115</serial_number>
             <value type="Atom3d" >
              <element type="Element" >
               <code type="char" >2</code>
              </element>
              <formal_charge type="int" >0</formal_charge>
              <radius type="float" >0.23000000000000001</radius>
              <label type="string" >H6C</label>
              <site type="Handle" >
               <serial_number type="int" >116</serial_number>
               <value type="Site" >
                <orthogonal type="Point" >
                 <coordinates type="Vector" >
                  <vector type="Container" >
                   <count type="int" >3</count>
                   <item type="float" >-2.4962040071295477</item>
                   <item type="float" >2.6673327199999997</item>
                   <item type="float" >1.9567375669005547</item>
                  </vector>
                 </coordinates>
                </orthogonal>
                <fractional type="Point" >
                 <coordinates type="Vector" >
                  <vector type="Container" >
                   <count type="int" >3</count>
                   <item type="float" >-0.16950000000000001</item>
                   <item type="float" >0.36009999999999998</item>
                   <item type="float" >0.058799999999999998</item>
                  </vector>
                 </coordinates>
                </fractional>
                <uncertain_value type="UncertainValue" >
                 <value type="float" >1</value>
                 <uncertainty type="Uncertainty" >
                  <precision type="int" >0</precision>
                  <uncertainty type="int" >0</uncertainty>
                 </uncertainty>
                </uncertain_value>
                <uncertainty type="Handle" >
                 <serial_number type="int" >117</serial_number>
                 <value type="Container" >
                  <count type="int" >3</count>
                  <item type="Uncertainty" >
                   <precision type="int" >4</precision>
                   <uncertainty type="int" >0</uncertainty>
                  </item>
                  <item type="Uncertainty" >
                   <precision type="int" >4</precision>
                   <uncertainty type="int" >0</uncertainty>
                  </item>
                  <item type="Uncertainty" >
                   <precision type="int" >4</precision>
                   <uncertainty type="int" >0</uncertainty>
                  </item>
                 </value>
                </uncertainty>
                <adps type="Handle" >
                 <serial_number type="int" >118</serial_number>
                 <value type="AtomicDisplacementParameters" >
                  <uvalues type="Container" >
                   <count type="int" >6</count>
                   <item type="UncertainValue" >
                    <value type="float" >0.050000000000000017</value>
                    <uncertainty type="Uncertainty" >
                     <precision type="int" >1000000</precision>
                     <uncertainty type="int" >0</uncertainty>
                    </uncertainty>
                   </item>
                   <item type="UncertainValue" >
                    <value type="float" >0.050000000000000024</value>
                    <uncertainty type="Uncertainty" >
                     <precision type="int" >1000000</precision>
                     <uncertainty type="int" >0</uncertainty>
                    </uncertainty>
                   </item>
                   <item type="UncertainValue" >
                    <value type="float" >0.050000000000000017</value>
                    <uncertainty type="Uncertainty" >
                     <precision type="int" >1000000</precision>
                     <uncertainty type="int" >0</uncertainty>
                    </uncertainty>
                   </item>
                   <item type="UncertainValue" >
                    <value type="float" >-3.1419050834068217e-18</value>
                    <uncertainty type="Uncertainty" >
                     <precision type="int" >1000000</precision>
                     <uncertainty type="int" >0</uncertainty>
                    </uncertainty>
                   </item>
                   <item type="UncertainValue" >
                    <value type="float" >0.0012940171430438038</value>
                    <uncertainty type="Uncertainty" >
                     <precision type="int" >1000000</precision>
                     <uncertainty type="int" >0</uncertainty>
                    </uncertainty>
                   </item>
                   <item type="UncertainValue" >
                    <value type="float" >-3.1419050834068225e-18</value>
                    <uncertainty type="Uncertainty" >
                     <precision type="int" >1000000</precision>
                     <uncertainty type="int" >0</uncertainty>
                    </uncertainty>
                   </item>
                  </uvalues>
                  <type type="AtomicDisplacementParameters::Type" >
                   <enumerator type="int" >1</enumerator>
                  </type>
                  <u_equivalent type="float" >0.050000000000000003</u_equivalent>
                 </value>
                </adps>
               </value>
              </site>
              <annotations type="Annotations" >
               <annotations type="Container" >
                <count type="int" >1</count>
                <item type="Handle" >
                 <serial_number type="int" >119</serial_number>
                 <value type="FileOrdering" >
                  <value type="Handle" >
                   <serial_number type="int" >120</serial_number>
                   <value type="FileOrdering" >
                    <file_order type="int" >18</file_order>
                   </value>
                  </value>
                 </value>
                </item>
               </annotations>
              </annotations>
             </value>
            </item>
            <item type="Handle" >
             <serial_number type="int" >121</serial_number>
             <value type="Atom3d" >
              <element type="Element" >
               <code type="char" >1</code>
              </element>
              <formal_charge type="int" >0</formal_charge>
              <radius type="float" >0.68000000000000005</radius>
              <label type="string" >C7</label>
              <site type="Handle" >
               <serial_number type="int" >122</serial_number>
               <value type="Site" >
                <orthogonal type="Point" >
                 <coordinates type="Vector" >
                  <vector type="Container" >
                   <count type="int" >3</count>
                   <item type="float" >-0.70669896194199178</item>
                   <item type="float" >1.2488539200000002</item>
                   <item type="float" >3.2775354245584287</item>
                  </vector>
                 </coordinates>
                </orthogonal>
                <fractional type="Point" >
                 <coordinates type="Vector" >
                  <vector type="Container" >
                   <count type="int" >3</count>
                   <item type="float" >-0.043099999999999999</item>
                   <item type="float" >0.1686</item>
                   <item type="float" >0.098489999999999994</item>
                  </vector>
                 </coordinates>
                </fractional>
                <uncertain_value type="UncertainValue" >
                 <value type="float" >1</value>
                 <uncertainty type="Uncertainty" >
                  <precision type="int" >0</precision>
                  <uncertainty type="int" >0</uncertainty>
                 </uncertainty>
                </uncertain_value>
                <uncertainty type="Handle" >
                 <serial_number type="int" >123</serial_number>
                 <value type="Container" >
                  <count type="int" >3</count>
                  <item type="Uncertainty" >
                   <precision type="int" >4</precision>
                   <uncertainty type="int" >2</uncertainty>
                  </item>
                  <item type="Uncertainty" >
                   <precision type="int" >4</precision>
                   <uncertainty type="int" >5</uncertainty>
                  </item>
                  <item type="Uncertainty" >
                   <precision type="int" >5</precision>
                   <uncertainty type="int" >10</uncertainty>
                  </item>
                 </value>
                </uncertainty>
                <adps type="Handle" >
                 <serial_number type="int" >124</serial_number>
                 <value type="AtomicDisplacementParameters" >
                  <uvalues type="Container" >
                   <count type="int" >6</count>
                   <item type="UncertainValue" >
                    <value type="float" >0.036999999999999998</value>
                    <uncertainty type="Uncertainty" >
                     <precision type="int" >3</precision>
                     <uncertainty type="int" >2</uncertainty>
                    </uncertainty>
                   </item>
                   <item type="UncertainValue" >
                    <value type="float" >0.034000000000000002</value>
                    <uncertainty type="Uncertainty" >
                     <precision type="int" >3</precision>
                     <uncertainty type="int" >2</uncertainty>
                    </uncertainty>
                   </item>
                   <item type="UncertainValue" >
                    <value type="float" >0.037999999999999999</value>
                    <uncertainty type="Uncertainty" >
                     <precision type="int" >3</precision>
                     <uncertainty type="int" >2</uncertainty>
                    </uncertainty>
                   </item>
                   <item type="UncertainValue" >
                    <value type="float" >-0.011599999999999999</value>
                    <uncertainty type="Uncertainty" >
                     <precision type="int" >4</precision>
                     <uncertainty type="int" >18</uncertainty>
                    </uncertainty>
                   </item>
                   <item type="UncertainValue" >
                    <value type="float" >-0.0083000000000000001</value>
                    <uncertainty type="Uncertainty" >
                     <precision type="int" >4</precision>
                     <uncertainty type="int" >18</uncertainty>
                    </uncertainty>
                   </item>
                   <item type="UncertainValue" >
                    <value type="float" >0.012</value>
                    <uncertainty type="Uncertainty" >
                     <precision type="int" >4</precision>
                     <uncertainty type="int" >18</uncertainty>
                    </uncertainty>
                   </item>
                  </uvalues>
                  <type type="AtomicDisplacementParameters::Type" >
                   <enumerator type="int" >0</enumerator>
                  </type>
                  <u_equivalent type="float" >0.036493389905463448</u_equivalent>
                 </value>
                </adps>
               </value>
              </site>
              <annotations type="Annotations" >
               <annotations type="Container" >
                <count type="int" >1</count>
                <item type="Handle" >
                 <serial_number type="int" >125</serial_number>
                 <value type="FileOrdering" >
                  <value type="Handle" >
                   <serial_number type="int" >126</serial_number>
                   <value type="FileOrdering" >
                    <file_order type="int" >19</file_order>
                   </value>
                  </value>
                 </value>
                </item>
               </annotations>
              </annotations>
             </value>
            </item>
            <item type="Handle" >
             <serial_number type="int" >127</serial_number>
             <value type="Atom3d" >
              <element type="Element" >
               <code type="char" >2</code>
              </element>
              <formal_charge type="int" >0</formal_charge>
              <radius type="float" >0.23000000000000001</radius>
              <label type="string" >H7A</label>
              <site type="Handle" >
               <serial_number type="int" >128</serial_number>
               <value type="Site" >
                <orthogonal type="Point" >
                 <coordinates type="Vector" >
                  <vector type="Container" >
                   <count type="int" >3</count>
                   <item type="float" >-1.1617033279461608</item>
                   <item type="float" >0.67331448000000005</item>
                   <item type="float" >2.628950132400405</item>
                  </vector>
                 </coordinates>
                </orthogonal>
                <fractional type="Point" >
                 <coordinates type="Vector" >
                  <vector type="Container" >
                   <count type="int" >3</count>
                   <item type="float" >-0.075800000000000006</item>
                   <item type="float" >0.090899999999999995</item>
                   <item type="float" >0.079000000000000001</item>
                  </vector>
                 </coordinates>
                </fractional>
                <uncertain_value type="UncertainValue" >
                 <value type="float" >1</value>
                 <uncertainty type="Uncertainty" >
                  <precision type="int" >0</precision>
                  <uncertainty type="int" >0</uncertainty>
                 </uncertainty>
                </uncertain_value>
                <uncertainty type="Handle" >
                 <serial_number type="int" >129</serial_number>
                 <value type="Container" >
                  <count type="int" >3</count>
                  <item type="Uncertainty" >
                   <precision type="int" >4</precision>
                   <uncertainty type="int" >0</uncertainty>
                  </item>
                  <item type="Uncertainty" >
                   <precision type="int" >4</precision>
                   <uncertainty type="int" >0</uncertainty>
                  </item>
                  <item type="Uncertainty" >
                   <precision type="int" >4</precision>
                   <uncertainty type="int" >0</uncertainty>
                  </item>
                 </value>
                </uncertainty>
                <adps type="Handle" >
                 <serial_number type="int" >130</serial_number>
                 <value type="AtomicDisplacementParameters" >
                  <uvalues type="Container" >
                   <count type="int" >6</count>
                   <item type="UncertainValue" >
                    <value type="float" >0.055000000000000021</value>
                    <uncertainty type="Uncertainty" >
                     <precision type="int" >1000000</precision>
                     <uncertainty type="int" >0</uncertainty>
                    </uncertainty>
                   </item>
                   <item type="UncertainValue" >
                    <value type="float" >0.055000000000000021</value>
                    <uncertainty type="Uncertainty" >
                     <precision type="int" >1000000</precision>
                     <uncertainty type="int" >0</uncertainty>
                    </uncertainty>
                   </item>
                   <item type="UncertainValue" >
                    <value type="float" >0.055000000000000007</value>
                    <uncertainty type="Uncertainty" >
                     <precision type="int" >1000000</precision>
                     <uncertainty type="int" >0</uncertainty>
                    </uncertainty>
                   </item>
                   <item type="UncertainValue" >
                    <value type="float" >-3.4560955917475042e-18</value>
                    <uncertainty type="Uncertainty" >
                     <precision type="int" >1000000</precision>
                     <uncertainty type="int" >0</uncertainty>
                    </uncertainty>
                   </item>
                   <item type="UncertainValue" >
                    <value type="float" >0.0014234188573481843</value>
                    <uncertainty type="Uncertainty" >
                     <precision type="int" >1000000</precision>
                     <uncertainty type="int" >0</uncertainty>
                    </uncertainty>
                   </item>
                   <item type="UncertainValue" >
                    <value type="float" >-3.4560955917475049e-18</value>
                    <uncertainty type="Uncertainty" >
                     <precision type="int" >1000000</precision>
                     <uncertainty type="int" >0</uncertainty>
                    </uncertainty>
                   </item>
                  </uvalues>
                  <type type="AtomicDisplacementParameters::Type" >
                   <enumerator type="int" >1</enumerator>
                  </type>
                  <u_equivalent type="float" >0.055</u_equivalent>
                 </value>
                </adps>
               </value>
              </site>
              <annotations type="Annotations" >
               <annotations type="Container" >
                <count type="int" >1</count>
                <item type="Handle" >
                 <serial_number type="int" >131</serial_number>
                 <value type="FileOrdering" >
                  <value type="Handle" >
                   <serial_number type="int" >132</serial_number>
                   <value type="FileOrdering" >
                    <file_order type="int" >20</file_order>
                   </value>
                  </value>
                 </value>
                </item>
               </annotations>
              </annotations>
             </value>
            </item>
            <item type="Handle" >
             <serial_number type="int" >133</serial_number>
             <value type="Atom3d" >
              <element type="Element" >
               <code type="char" >2</code>
              </element>
              <formal_charge type="int" >0</formal_charge>
              <radius type="float" >0.23000000000000001</radius>
              <label type="string" >H7B</label>
              <site type="Handle" >
               <serial_number type="int" >134</serial_number>
               <value type="Site" >
                <orthogonal type="Point" >
                 <coordinates type="Vector" >
                  <vector type="Container" >
                   <count type="int" >3</count>
                   <item type="float" >-1.2231262455867193</item>
                   <item type="float" >1.2740384</item>
                   <item type="float" >4.1098144474867091</item>
                  </vector>
                 </coordinates>
                </orthogonal>
                <fractional type="Point" >
                 <coordinates type="Vector" >
                  <vector type="Container" >
                   <count type="int" >3</count>
                   <item type="float" >-0.077399999999999997</item>
                   <item type="float" >0.17199999999999999</item>
                   <item type="float" >0.1235</item>
                  </vector>
                 </coordinates>
                </fractional>
                <uncertain_value type="UncertainValue" >
                 <value type="float" >1</value>
                 <uncertainty type="Uncertainty" >
                  <precision type="int" >0</precision>
                  <uncertainty type="int" >0</uncertainty>
                 </uncertainty>
                </uncertain_value>
                <uncertainty type="Handle" >
                 <serial_number type="int" >135</serial_number>
                 <value type="Container" >
                  <count type="int" >3</count>
                  <item type="Uncertainty" >
                   <precision type="int" >4</precision>
                   <uncertainty type="int" >0</uncertainty>
                  </item>
                  <item type="Uncertainty" >
                   <precision type="int" >4</precision>
                   <uncertainty type="int" >0</uncertainty>
                  </item>
                  <item type="Uncertainty" >
                   <precision type="int" >4</precision>
                   <uncertainty type="int" >0</uncertainty>
                  </item>
                 </value>
                </uncertainty>
                <adps type="Handle" >
                 <serial_number type="int" >136</serial_number>
                 <value type="AtomicDisplacementParameters" >
                  <uvalues type="Container" >
                   <count type="int" >6</count>
                   <item type="UncertainValue" >
                    <value type="float" >0.055000000000000021</value>
                    <uncertainty type="Uncertainty" >
                     <precision type="int" >1000000</precision>
                     <uncertainty type="int" >0</uncertainty>
                    </uncertainty>
                   </item>
                   <item type="UncertainValue" >
                    <value type="float" >0.055000000000000021</value>
                    <uncertainty type="Uncertainty" >
                     <precision type="int" >1000000</precision>
                     <uncertainty type="int" >0</uncertainty>
                    </uncertainty>
                   </item>
                   <item type="UncertainValue" >
                    <value type="float" >0.055000000000000007</value>
                    <uncertainty type="Uncertainty" >
                     <precision type="int" >1000000</precision>
                     <uncertainty type="int" >0</uncertainty>
                    </uncertainty>
                   </item>
                   <item type="UncertainValue" >
                    <value type="float" >-3.4560955917475042e-18</value>
                    <uncertainty type="Uncertainty" >
                     <precision type="int" >1000000</precision>
                     <uncertainty type="int" >0</uncertainty>
                    </uncertainty>
                   </item>
                   <item type="UncertainValue" >
                    <value type="float" >0.0014234188573481843</value>
                    <uncertainty type="Uncertainty" >
                     <precision type="int" >1000000</precision>
                     <uncertainty type="int" >0</uncertainty>
                    </uncertainty>
                   </item>
                   <item type="UncertainValue" >
                    <value type="float" >-3.4560955917475049e-18</value>
                    <uncertainty type="Uncertainty" >
                     <precision type="int" >1000000</precision>
                     <uncertainty type="int" >0</uncertainty>
                    </uncertainty>
                   </item>
                  </uvalues>
                  <type type="AtomicDisplacementParameters::Type" >
                   <enumerator type="int" >1</enumerator>
                  </type>
                  <u_equivalent type="float" >0.055</u_equivalent>
                 </value>
                </adps>
               </value>
              </site>
              <annotations type="Annotations" >
               <annotations type="Container" >
                <count type="int" >1</count>
                <item type="Handle" >
                 <serial_number type="int" >137</serial_number>
                 <value type="FileOrdering" >
                  <value type="Handle" >
                   <serial_number type="int" >138</serial_number>
                   <value type="FileOrdering" >
                    <file_order type="int" >21</file_order>
                   </value>
                  </value>
                 </value>
                </item>
               </annotations>
              </annotations>
             </value>
            </item>
            <item type="Handle" >
             <serial_number type="int" >139</serial_number>
             <value type="Atom3d" >
              <element type="Element" >
               <code type="char" >2</code>
              </element>
              <formal_charge type="int" >0</formal_charge>
              <radius type="float" >0.23000000000000001</radius>
              <label type="string" >H7C</label>
              <site type="Handle" >
               <serial_number type="int" >140</serial_number>
               <value type="Site" >
                <orthogonal type="Point" >
                 <coordinates type="Vector" >
                  <vector type="Container" >
                   <count type="int" >3</count>
                   <item type="float" >0.18750455678979644</item>
                   <item type="float" >0.89108616000000018</item>
                   <item type="float" >3.4575685918531911</item>
                  </vector>
                 </coordinates>
                </orthogonal>
                <fractional type="Point" >
                 <coordinates type="Vector" >
                  <vector type="Container" >
                   <count type="int" >3</count>
                   <item type="float" >0.019199999999999998</item>
                   <item type="float" >0.1203</item>
                   <item type="float" >0.10390000000000001</item>
                  </vector>
                 </coordinates>
                </fractional>
                <uncertain_value type="UncertainValue" >
                 <value type="float" >1</value>
                 <uncertainty type="Uncertainty" >
                  <precision type="int" >0</precision>
                  <uncertainty type="int" >0</uncertainty>
                 </uncertainty>
                </uncertain_value>
                <uncertainty type="Handle" >
                 <serial_number type="int" >141</serial_number>
                 <value type="Container" >
                  <count type="int" >3</count>
                  <item type="Uncertainty" >
                   <precision type="int" >4</precision>
                   <uncertainty type="int" >0</uncertainty>
                  </item>
                  <item type="Uncertainty" >
                   <precision type="int" >4</precision>
                   <uncertainty type="int" >0</uncertainty>
                  </item>
                  <item type="Uncertainty" >
                   <precision type="int" >4</precision>
                   <uncertainty type="int" >0</uncertainty>
                  </item>
                 </value>
                </uncertainty>
                <adps type="Handle" >
                 <serial_number type="int" >142</serial_number>
                 <value type="AtomicDisplacementParameters" >
                  <uvalues type="Container" >
                   <count type="int" >6</count>
                   <item type="UncertainValue" >
                    <value type="float" >0.055000000000000021</value>
                    <uncertainty type="Uncertainty" >
                     <precision type="int" >1000000</precision>
                     <uncertainty type="int" >0</uncertainty>
                    </uncertainty>
                   </item>
                   <item type="UncertainValue" >
                    <value type="float" >0.055000000000000021</value>
                    <uncertainty type="Uncertainty" >
                     <precision type="int" >1000000</precision>
                     <uncertainty type="int" >0</uncertainty>
                    </uncertainty>
                   </item>
                   <item type="UncertainValue" >
                    <value type="float" >0.055000000000000007</value>
                    <uncertainty type="Uncertainty" >
                     <precision type="int" >1000000</precision>
                     <uncertainty type="int" >0</uncertainty>
                    </uncertainty>
                   </item>
                   <item type="UncertainValue" >
                    <value type="float" >-3.4560955917475042e-18</value>
                    <uncertainty type="Uncertainty" >
                     <precision type="int" >1000000</precision>
                     <uncertainty type="int" >0</uncertainty>
                    </uncertainty>
                   </item>
                   <item type="UncertainValue" >
                    <value type="float" >0.0014234188573481843</value>
                    <uncertainty type="Uncertainty" >
                     <precision type="int" >1000000</precision>
                     <uncertainty type="int" >0</uncertainty>
                    </uncertainty>
                   </item>
                   <item type="UncertainValue" >
                    <value type="float" >-3.4560955917475049e-18</value>
                    <uncertainty type="Uncertainty" >
                     <precision type="int" >1000000</precision>
                     <uncertainty type="int" >0</uncertainty>
                    </uncertainty>
                   </item>
                  </uvalues>
                  <type type="AtomicDisplacementParameters::Type" >
                   <enumerator type="int" >1</enumerator>
                  </type>
                  <u_equivalent type="float" >0.055</u_equivalent>
                 </value>
                </adps>
               </value>
              </site>
              <annotations type="Annotations" >
               <annotations type="Container" >
                <count type="int" >1</count>
                <item type="Handle" >
                 <serial_number type="int" >143</serial_number>
                 <value type="FileOrdering" >
                  <value type="Handle" >
                   <serial_number type="int" >144</serial_number>
                   <value type="FileOrdering" >
                    <file_order type="int" >22</file_order>
                   </value>
                  </value>
                 </value>
                </item>
               </annotations>
              </annotations>
             </value>
            </item>
            <item type="Handle" >
             <serial_number type="int" >145</serial_number>
             <value type="Atom3d" >
              <element type="Element" >
               <code type="char" >1</code>
              </element>
              <formal_charge type="int" >0</formal_charge>
              <radius type="float" >0.68000000000000005</radius>
              <label type="string" >C8</label>
              <site type="Handle" >
               <serial_number type="int" >146</serial_number>
               <value type="Site" >
                <orthogonal type="Point" >
                 <coordinates type="Vector" >
                  <vector type="Container" >
                   <count type="int" >3</count>
                   <item type="float" >2.5044954365129706</item>
                   <item type="float" >2.2554923999999996</item>
                   <item type="float" >0.62096467684293111</item>
                  </vector>
                 </coordinates>
                </orthogonal>
                <fractional type="Point" >
                 <coordinates type="Vector" >
                  <vector type="Container" >
                   <count type="int" >3</count>
                   <item type="float" >0.17469999999999999</item>
                   <item type="float" >0.30449999999999999</item>
                   <item type="float" >0.01866</item>
                  </vector>
                 </coordinates>
                </fractional>
                <uncertain_value type="UncertainValue" >
                 <value type="float" >1</value>
                 <uncertainty type="Uncertainty" >
                  <precision type="int" >0</precision>
                  <uncertainty type="int" >0</uncertainty>
                 </uncertainty>
                </uncertain_value>
                <uncertainty type="Handle" >
                 <serial_number type="int" >147</serial_number>
                 <value type="Container" >
                  <count type="int" >3</count>
                  <item type="Uncertainty" >
                   <precision type="int" >4</precision>
                   <uncertainty type="int" >2</uncertainty>
                  </item>
                  <item type="Uncertainty" >
                   <precision type="int" >4</precision>
                   <uncertainty type="int" >5</uncertainty>
                  </item>
                  <item type="Uncertainty" >
                   <precision type="int" >5</precision>
                   <uncertainty type="int" >9</uncertainty>
                  </item>
                 </value>
                </uncertainty>
                <adps type="Handle" >
                 <serial_number type="int" >148</serial_number>
                 <value type="AtomicDisplacementParameters" >
                  <uvalues type="Container" >
                   <count type="int" >6</count>
                   <item type="UncertainValue" >
                    <value type="float" >0.032000000000000001</value>
                    <uncertainty type="Uncertainty" >
                     <precision type="int" >3</precision>
                     <uncertainty type="int" >2</uncertainty>
                    </uncertainty>
                   </item>
                   <item type="UncertainValue" >
                    <value type="float" >0.024</value>
                    <uncertainty type="Uncertainty" >
                     <precision type="int" >3</precision>
                     <uncertainty type="int" >2</uncertainty>
                    </uncertainty>
                   </item>
                   <item type="UncertainValue" >
                    <value type="float" >0.023400000000000001</value>
                    <uncertainty type="Uncertainty" >
                     <precision type="int" >4</precision>
                     <uncertainty type="int" >18</uncertainty>
                    </uncertainty>
                   </item>
                   <item type="UncertainValue" >
                    <value type="float" >-0.00089999999999999998</value>
                    <uncertainty type="Uncertainty" >
                     <precision type="int" >4</precision>
                     <uncertainty type="int" >17</uncertainty>
                    </uncertainty>
                   </item>
                   <item type="UncertainValue" >
                    <value type="float" >-0.0071000000000000004</value>
                    <uncertainty type="Uncertainty" >
                     <precision type="int" >4</precision>
                     <uncertainty type="int" >16</uncertainty>
                    </uncertainty>
                   </item>
                   <item type="UncertainValue" >
                    <value type="float" >0.0027000000000000001</value>
                    <uncertainty type="Uncertainty" >
                     <precision type="int" >4</precision>
                     <uncertainty type="int" >15</uncertainty>
                    </uncertainty>
                   </item>
                  </uvalues>
                  <type type="AtomicDisplacementParameters::Type" >
                   <enumerator type="int" >0</enumerator>
                  </type>
                  <u_equivalent type="float" >0.026601626179336989</u_equivalent>
                 </value>
                </adps>
               </value>
              </site>
              <annotations type="Annotations" >
               <annotations type="Container" >
                <count type="int" >1</count>
                <item type="Handle" >
                 <serial_number type="int" >149</serial_number>
                 <value type="FileOrdering" >
                  <value type="Handle" >
                   <serial_number type="int" >150</serial_number>
                   <value type="FileOrdering" >
                    <file_order type="int" >23</file_order>
                   </value>
                  </value>
                 </value>
                </item>
               </annotations>
              </annotations>
             </value>
            </item>
            <item type="Handle" >
             <serial_number type="int" >151</serial_number>
             <value type="Atom3d" >
              <element type="Element" >
               <code type="char" >1</code>
              </element>
              <formal_charge type="int" >0</formal_charge>
              <radius type="float" >0.68000000000000005</radius>
              <label type="string" >C9</label>
              <site type="Handle" >
               <serial_number type="int" >152</serial_number>
               <value type="Site" >
                <orthogonal type="Point" >
                 <coordinates type="Vector" >
                  <vector type="Container" >
                   <count type="int" >3</count>
                   <item type="float" >2.3817957254726161</item>
                   <item type="float" >1.00293488</item>
                   <item type="float" >0.010316133430938299</item>
                  </vector>
                 </coordinates>
                </orthogonal>
                <fractional type="Point" >
                 <coordinates type="Vector" >
                  <vector type="Container" >
                   <count type="int" >3</count>
                   <item type="float" >0.1651</item>
                   <item type="float" >0.13539999999999999</item>
                   <item type="float" >0.00031</item>
                  </vector>
                 </coordinates>
                </fractional>
                <uncertain_value type="UncertainValue" >
                 <value type="float" >1</value>
                 <uncertainty type="Uncertainty" >
                  <precision type="int" >0</precision>
                  <uncertainty type="int" >0</uncertainty>
                 </uncertainty>
                </uncertain_value>
                <uncertainty type="Handle" >
                 <serial_number type="int" >153</serial_number>
                 <value type="Container" >
                  <count type="int" >3</count>
                  <item type="Uncertainty" >
                   <precision type="int" >4</precision>
                   <uncertainty type="int" >3</uncertainty>
                  </item>
                  <item type="Uncertainty" >
                   <precision type="int" >4</precision>
                   <uncertainty type="int" >5</uncertainty>
                  </item>
                  <item type="Uncertainty" >
                   <precision type="int" >5</precision>
                   <uncertainty type="int" >10</uncertainty>
                  </item>
                 </value>
                </uncertainty>
                <adps type="Handle" >
                 <serial_number type="int" >154</serial_number>
                 <value type="AtomicDisplacementParameters" >
                  <uvalues type="Container" >
                   <count type="int" >6</count>
                   <item type="UncertainValue" >
                    <value type="float" >0.039</value>
                    <uncertainty type="Uncertainty" >
                     <precision type="int" >3</precision>
                     <uncertainty type="int" >2</uncertainty>
                    </uncertainty>
                   </item>
                   <item type="UncertainValue" >
                    <value type="float" >0.029000000000000001</value>
                    <uncertainty type="Uncertainty" >
                     <precision type="int" >3</precision>
                     <uncertainty type="int" >2</uncertainty>
                    </uncertainty>
                   </item>
                   <item type="UncertainValue" >
                    <value type="float" >0.029999999999999999</value>
                    <uncertainty type="Uncertainty" >
                     <precision type="int" >3</precision>
                     <uncertainty type="int" >2</uncertainty>
                    </uncertainty>
                   </item>
                   <item type="UncertainValue" >
                    <value type="float" >-0.0047000000000000002</value>
                    <uncertainty type="Uncertainty" >
                     <precision type="int" >4</precision>
                     <uncertainty type="int" >18</uncertainty>
                    </uncertainty>
                   </item>
                   <item type="UncertainValue" >
                    <value type="float" >-0.013100000000000001</value>
                    <uncertainty type="Uncertainty" >
                     <precision type="int" >4</precision>
                     <uncertainty type="int" >18</uncertainty>
                    </uncertainty>
                   </item>
                   <item type="UncertainValue" >
                    <value type="float" >0.00029999999999999997</value>
                    <uncertainty type="Uncertainty" >
                     <precision type="int" >4</precision>
                     <uncertainty type="int" >17</uncertainty>
                    </uncertainty>
                   </item>
                  </uvalues>
                  <type type="AtomicDisplacementParameters::Type" >
                   <enumerator type="int" >0</enumerator>
                  </type>
                  <u_equivalent type="float" >0.0329082553612337</u_equivalent>
                 </value>
                </adps>
               </value>
              </site>
              <annotations type="Annotations" >
               <annotations type="Container" >
                <count type="int" >1</count>
                <item type="Handle" >
                 <serial_number type="int" >155</serial_number>
                 <value type="FileOrdering" >
                  <value type="Handle" >
                   <serial_number type="int" >156</serial_number>
                   <value type="FileOrdering" >
                    <file_order type="int" >24</file_order>
                   </value>
                  </value>
                 </value>
                </item>
               </annotations>
              </annotations>
             </value>
            </item>
            <item type="Handle" >
             <serial_number type="int" >157</serial_number>
             <value type="Atom3d" >
              <element type="Element" >
               <code type="char" >2</code>
              </element>
              <formal_charge type="int" >0</formal_charge>
              <radius type="float" >0.23000000000000001</radius>
              <label type="string" >H9</label>
              <site type="Handle" >
               <serial_number type="int" >158</serial_number>
               <value type="Site" >
                <orthogonal type="Point" >
                 <coordinates type="Vector" >
                  <vector type="Container" >
                   <count type="int" >3</count>
                   <item type="float" >1.657345378718831</item>
                   <item type="float" >0.43480264000000002</item>
                   <item type="float" >0.23960051839598628</item>
                  </vector>
                 </coordinates>
                </orthogonal>
                <fractional type="Point" >
                 <coordinates type="Vector" >
                  <vector type="Container" >
                   <count type="int" >3</count>
                   <item type="float" >0.1153</item>
                   <item type="float" >0.058700000000000002</item>
                   <item type="float" >0.0071999999999999998</item>
                  </vector>
                 </coordinates>
                </fractional>
                <uncertain_value type="UncertainValue" >
                 <value type="float" >1</value>
                 <uncertainty type="Uncertainty" >
                  <precision type="int" >0</precision>
                  <uncertainty type="int" >0</uncertainty>
                 </uncertainty>
                </uncertain_value>
                <uncertainty type="Handle" >
                 <serial_number type="int" >159</serial_number>
                 <value type="Container" >
                  <count type="int" >3</count>
                  <item type="Uncertainty" >
                   <precision type="int" >4</precision>
                   <uncertainty type="int" >0</uncertainty>
                  </item>
                  <item type="Uncertainty" >
                   <precision type="int" >4</precision>
                   <uncertainty type="int" >0</uncertainty>
                  </item>
                  <item type="Uncertainty" >
                   <precision type="int" >4</precision>
                   <uncertainty type="int" >0</uncertainty>
                  </item>
                 </value>
                </uncertainty>
                <adps type="Handle" >
                 <serial_number type="int" >160</serial_number>
                 <value type="AtomicDisplacementParameters" >
                  <uvalues type="Container" >
                   <count type="int" >6</count>
                   <item type="UncertainValue" >
                    <value type="float" >0.040000000000000022</value>
                    <uncertainty type="Uncertainty" >
                     <precision type="int" >1000000</precision>
                     <uncertainty type="int" >0</uncertainty>
                    </uncertainty>
                   </item>
                   <item type="UncertainValue" >
                    <value type="float" >0.040000000000000008</value>
                    <uncertainty type="Uncertainty" >
                     <precision type="int" >1000000</precision>
                     <uncertainty type="int" >0</uncertainty>
                    </uncertainty>
                   </item>
                   <item type="UncertainValue" >
                    <value type="float" >0.040000000000000008</value>
                    <uncertainty type="Uncertainty" >
                     <precision type="int" >1000000</precision>
                     <uncertainty type="int" >0</uncertainty>
                    </uncertainty>
                   </item>
                   <item type="UncertainValue" >
                    <value type="float" >-2.5135240667254576e-18</value>
                    <uncertainty type="Uncertainty" >
                     <precision type="int" >1000000</precision>
                     <uncertainty type="int" >0</uncertainty>
                    </uncertainty>
                   </item>
                   <item type="UncertainValue" >
                    <value type="float" >0.0010352137144350431</value>
                    <uncertainty type="Uncertainty" >
                     <precision type="int" >1000000</precision>
                     <uncertainty type="int" >0</uncertainty>
                    </uncertainty>
                   </item>
                   <item type="UncertainValue" >
                    <value type="float" >-2.5135240667254576e-18</value>
                    <uncertainty type="Uncertainty" >
                     <precision type="int" >1000000</precision>
                     <uncertainty type="int" >0</uncertainty>
                    </uncertainty>
                   </item>
                  </uvalues>
                  <type type="AtomicDisplacementParameters::Type" >
                   <enumerator type="int" >1</enumerator>
                  </type>
                  <u_equivalent type="float" >0.040000000000000001</u_equivalent>
                 </value>
                </adps>
               </value>
              </site>
              <annotations type="Annotations" >
               <annotations type="Container" >
                <count type="int" >1</count>
                <item type="Handle" >
                 <serial_number type="int" >161</serial_number>
                 <value type="FileOrdering" >
                  <value type="Handle" >
                   <serial_number type="int" >162</serial_number>
                   <value type="FileOrdering" >
                    <file_order type="int" >25</file_order>
                   </value>
                  </value>
                 </value>
                </item>
               </annotations>
              </annotations>
             </value>
            </item>
            <item type="Handle" >
             <serial_number type="int" >163</serial_number>
             <value type="Atom3d" >
              <element type="Element" >
               <code type="char" >1</code>
              </element>
              <formal_charge type="int" >0</formal_charge>
              <radius type="float" >0.68000000000000005</radius>
              <label type="string" >C10</label>
              <site type="Handle" >
               <serial_number type="int" >164</serial_number>
               <value type="Site" >
                <orthogonal type="Point" >
                 <coordinates type="Vector" >
                  <vector type="Container" >
                   <count type="int" >3</count>
                   <item type="float" >3.3018543094738217</item>
                   <item type="float" >0.59183527999999985</item>
                   <item type="float" >-0.91979976784236961</item>
                  </vector>
                 </coordinates>
                </orthogonal>
                <fractional type="Point" >
                 <coordinates type="Vector" >
                  <vector type="Container" >
                   <count type="int" >3</count>
                   <item type="float" >0.22720000000000001</item>
                   <item type="float" >0.079899999999999999</item>
                   <item type="float" >-0.027640000000000001</item>
                  </vector>
                 </coordinates>
                </fractional>
                <uncertain_value type="UncertainValue" >
                 <value type="float" >1</value>
                 <uncertainty type="Uncertainty" >
                  <precision type="int" >0</precision>
                  <uncertainty type="int" >0</uncertainty>
                 </uncertainty>
                </uncertain_value>
                <uncertainty type="Handle" >
                 <serial_number type="int" >165</serial_number>
                 <value type="Container" >
                  <count type="int" >3</count>
                  <item type="Uncertainty" >
                   <precision type="int" >4</precision>
                   <uncertainty type="int" >2</uncertainty>
                  </item>
                  <item type="Uncertainty" >
                   <precision type="int" >4</precision>
                   <uncertainty type="int" >5</uncertainty>
                  </item>
                  <item type="Uncertainty" >
                   <precision type="int" >5</precision>
                   <uncertainty type="int" >10</uncertainty>
                  </item>
                 </value>
                </uncertainty>
                <adps type="Handle" >
                 <serial_number type="int" >166</serial_number>
                 <value type="AtomicDisplacementParameters" >
                  <uvalues type="Container" >
                   <count type="int" >6</count>
                   <item type="UncertainValue" >
                    <value type="float" >0.040000000000000001</value>
                    <uncertainty type="Uncertainty" >
                     <precision type="int" >3</precision>
                     <uncertainty type="int" >2</uncertainty>
                    </uncertainty>
                   </item>
                   <item type="UncertainValue" >
                    <value type="float" >0.023</value>
                    <uncertainty type="Uncertainty" >
                     <precision type="int" >3</precision>
                     <uncertainty type="int" >2</uncertainty>
                    </uncertainty>
                   </item>
                   <item type="UncertainValue" >
                    <value type="float" >0.031</value>
                    <uncertainty type="Uncertainty" >
                     <precision type="int" >3</precision>
                     <uncertainty type="int" >2</uncertainty>
                    </uncertainty>
                   </item>
                   <item type="UncertainValue" >
                    <value type="float" >0.0028999999999999998</value>
                    <uncertainty type="Uncertainty" >
                     <precision type="int" >4</precision>
                     <uncertainty type="int" >18</uncertainty>
                    </uncertainty>
                   </item>
                   <item type="UncertainValue" >
                    <value type="float" >-0.0161</value>
                    <uncertainty type="Uncertainty" >
                     <precision type="int" >4</precision>
                     <uncertainty type="int" >18</uncertainty>
                    </uncertainty>
                   </item>
                   <item type="UncertainValue" >
                    <value type="float" >-0.0047999999999999996</value>
                    <uncertainty type="Uncertainty" >
                     <precision type="int" >4</precision>
                     <uncertainty type="int" >17</uncertainty>
                    </uncertainty>
                   </item>
                  </uvalues>
                  <type type="AtomicDisplacementParameters::Type" >
                   <enumerator type="int" >0</enumerator>
                  </type>
                  <u_equivalent type="float" >0.031627164233138633</u_equivalent>
                 </value>
                </adps>
               </value>
              </site>
              <annotations type="Annotations" >
               <annotations type="Container" >
                <count type="int" >1</count>
                <item type="Handle" >
                 <serial_number type="int" >167</serial_number>
                 <value type="FileOrdering" >
                  <value type="Handle" >
                   <serial_number type="int" >168</serial_number>
                   <value type="FileOrdering" >
                    <file_order type="int" >26</file_order>
                   </value>
                  </value>
                 </value>
                </item>
               </annotations>
              </annotations>
             </value>
            </item>
            <item type="Handle" >
             <serial_number type="int" >169</serial_number>
             <value type="Atom3d" >
              <element type="Element" >
               <code type="char" >2</code>
              </element>
              <formal_charge type="int" >0</formal_charge>
              <radius type="float" >0.23000000000000001</radius>
              <label type="string" >H10</label>
              <site type="Handle" >
               <serial_number type="int" >170</serial_number>
               <value type="Site" >
                <orthogonal type="Point" >
                 <coordinates type="Vector" >
                  <vector type="Container" >
                   <count type="int" >3</count>
                   <item type="float" >3.2068338170464306</item>
                   <item type="float" >-0.26591848000000007</item>
                   <item type="float" >-1.3178028511779247</item>
                  </vector>
                 </coordinates>
                </orthogonal>
                <fractional type="Point" >
                 <coordinates type="Vector" >
                  <vector type="Container" >
                   <count type="int" >3</count>
                   <item type="float" >0.21990000000000001</item>
                   <item type="float" >-0.035900000000000001</item>
                   <item type="float" >-0.039600000000000003</item>
                  </vector>
                 </coordinates>
                </fractional>
                <uncertain_value type="UncertainValue" >
                 <value type="float" >1</value>
                 <uncertainty type="Uncertainty" >
                  <precision type="int" >0</precision>
                  <uncertainty type="int" >0</uncertainty>
                 </uncertainty>
                </uncertain_value>
                <uncertainty type="Handle" >
                 <serial_number type="int" >171</serial_number>
                 <value type="Container" >
                  <count type="int" >3</count>
                  <item type="Uncertainty" >
                   <precision type="int" >4</precision>
                   <uncertainty type="int" >0</uncertainty>
                  </item>
                  <item type="Uncertainty" >
                   <precision type="int" >4</precision>
                   <uncertainty type="int" >0</uncertainty>
                  </item>
                  <item type="Uncertainty" >
                   <precision type="int" >4</precision>
                   <uncertainty type="int" >0</uncertainty>
                  </item>
                 </value>
                </uncertainty>
                <adps type="Handle" >
                 <serial_number type="int" >172</serial_number>
                 <value type="AtomicDisplacementParameters" >
                  <uvalues type="Container" >
                   <count type="int" >6</count>
                   <item type="UncertainValue" >
                    <value type="float" >0.038000000000000006</value>
                    <uncertainty type="Uncertainty" >
                     <precision type="int" >1000000</precision>
                     <uncertainty type="int" >0</uncertainty>
                    </uncertainty>
                   </item>
                   <item type="UncertainValue" >
                    <value type="float" >0.038000000000000006</value>
                    <uncertainty type="Uncertainty" >
                     <precision type="int" >1000000</precision>
                     <uncertainty type="int" >0</uncertainty>
                    </uncertainty>
                   </item>
                   <item type="UncertainValue" >
                    <value type="float" >0.038000000000000013</value>
                    <uncertainty type="Uncertainty" >
                     <precision type="int" >1000000</precision>
                     <uncertainty type="int" >0</uncertainty>
                    </uncertainty>
                   </item>
                   <item type="UncertainValue" >
                    <value type="float" >-2.3878478633891843e-18</value>
                    <uncertainty type="Uncertainty" >
                     <precision type="int" >1000000</precision>
                     <uncertainty type="int" >0</uncertainty>
                    </uncertainty>
                   </item>
                   <item type="UncertainValue" >
                    <value type="float" >0.00098345302871329066</value>
                    <uncertainty type="Uncertainty" >
                     <precision type="int" >1000000</precision>
                     <uncertainty type="int" >0</uncertainty>
                    </uncertainty>
                   </item>
                   <item type="UncertainValue" >
                    <value type="float" >-2.3878478633891851e-18</value>
                    <uncertainty type="Uncertainty" >
                     <precision type="int" >1000000</precision>
                     <uncertainty type="int" >0</uncertainty>
                    </uncertainty>
                   </item>
                  </uvalues>
                  <type type="AtomicDisplacementParameters::Type" >
                   <enumerator type="int" >1</enumerator>
                  </type>
                  <u_equivalent type="float" >0.037999999999999999</u_equivalent>
                 </value>
                </adps>
               </value>
              </site>
              <annotations type="Annotations" >
               <annotations type="Container" >
                <count type="int" >1</count>
                <item type="Handle" >
                 <serial_number type="int" >173</serial_number>
                 <value type="FileOrdering" >
                  <value type="Handle" >
                   <serial_number type="int" >174</serial_number>
                   <value type="FileOrdering" >
                    <file_order type="int" >27</file_order>
                   </value>
                  </value>
                 </value>
                </item>
               </annotations>
              </annotations>
             </value>
            </item>
            <item type="Handle" >
             <serial_number type="int" >175</serial_number>
             <value type="Atom3d" >
              <element type="Element" >
               <code type="char" >1</code>
              </element>
              <formal_charge type="int" >0</formal_charge>
              <radius type="float" >0.68000000000000005</radius>
              <label type="string" >C11</label>
              <site type="Handle" >
               <serial_number type="int" >176</serial_number>
               <value type="Site" >
                <orthogonal type="Point" >
                 <coordinates type="Vector" >
                  <vector type="Container" >
                   <count type="int" >3</count>
                   <item type="float" >4.3734904067623228</item>
                   <item type="float" >1.3984793599999998</item>
                   <item type="float" >-1.2958394703249592</item>
                  </vector>
                 </coordinates>
                </orthogonal>
                <fractional type="Point" >
                 <coordinates type="Vector" >
                  <vector type="Container" >
                   <count type="int" >3</count>
                   <item type="float" >0.30080000000000001</item>
                   <item type="float" >0.1888</item>
                   <item type="float" >-0.038940000000000002</item>
                  </vector>
                 </coordinates>
                </fractional>
                <uncertain_value type="UncertainValue" >
                 <value type="float" >1</value>
                 <uncertainty type="Uncertainty" >
                  <precision type="int" >0</precision>
                  <uncertainty type="int" >0</uncertainty>
                 </uncertainty>
                </uncertain_value>
                <uncertainty type="Handle" >
                 <serial_number type="int" >177</serial_number>
                 <value type="Container" >
                  <count type="int" >3</count>
                  <item type="Uncertainty" >
                   <precision type="int" >4</precision>
                   <uncertainty type="int" >2</uncertainty>
                  </item>
                  <item type="Uncertainty" >
                   <precision type="int" >4</precision>
                   <uncertainty type="int" >5</uncertainty>
                  </item>
                  <item type="Uncertainty" >
                   <precision type="int" >5</precision>
                   <uncertainty type="int" >9</uncertainty>
                  </item>
                 </value>
                </uncertainty>
                <adps type="Handle" >
                 <serial_number type="int" >178</serial_number>
                 <value type="AtomicDisplacementParameters" >
                  <uvalues type="Container" >
                   <count type="int" >6</count>
                   <item type="UncertainValue" >
                    <value type="float" >0.032000000000000001</value>
                    <uncertainty type="Uncertainty" >
                     <precision type="int" >3</precision>
                     <uncertainty type="int" >2</uncertainty>
                    </uncertainty>
                   </item>
                   <item type="UncertainValue" >
                    <value type="float" >0.029999999999999999</value>
                    <uncertainty type="Uncertainty" >
                     <precision type="int" >3</precision>
                     <uncertainty type="int" >2</uncertainty>
                    </uncertainty>
                   </item>
                   <item type="UncertainValue" >
                    <value type="float" >0.0229</value>
                    <uncertainty type="Uncertainty" >
                     <precision type="int" >4</precision>
                     <uncertainty type="int" >18</uncertainty>
                    </uncertainty>
                   </item>
                   <item type="UncertainValue" >
                    <value type="float" >0.0094999999999999998</value>
                    <uncertainty type="Uncertainty" >
                     <precision type="int" >4</precision>
                     <uncertainty type="int" >17</uncertainty>
                    </uncertainty>
                   </item>
                   <item type="UncertainValue" >
                    <value type="float" >-0.0137</value>
                    <uncertainty type="Uncertainty" >
                     <precision type="int" >4</precision>
                     <uncertainty type="int" >16</uncertainty>
                    </uncertainty>
                   </item>
                   <item type="UncertainValue" >
                    <value type="float" >-0.0030000000000000001</value>
                    <uncertainty type="Uncertainty" >
                     <precision type="int" >4</precision>
                     <uncertainty type="int" >16</uncertainty>
                    </uncertainty>
                   </item>
                  </uvalues>
                  <type type="AtomicDisplacementParameters::Type" >
                   <enumerator type="int" >0</enumerator>
                  </type>
                  <u_equivalent type="float" >0.028548797637115476</u_equivalent>
                 </value>
                </adps>
               </value>
              </site>
              <annotations type="Annotations" >
               <annotations type="Container" >
                <count type="int" >1</count>
                <item type="Handle" >
                 <serial_number type="int" >179</serial_number>
                 <value type="FileOrdering" >
                  <value type="Handle" >
                   <serial_number type="int" >180</serial_number>
                   <value type="FileOrdering" >
                    <file_order type="int" >28</file_order>
                   </value>
                  </value>
                 </value>
                </item>
               </annotations>
              </annotations>
             </value>
            </item>
            <item type="Handle" >
             <serial_number type="int" >181</serial_number>
             <value type="Atom3d" >
              <element type="Element" >
               <code type="char" >1</code>
              </element>
              <formal_charge type="int" >0</formal_charge>
              <radius type="float" >0.68000000000000005</radius>
              <label type="string" >C12</label>
              <site type="Handle" >
               <serial_number type="int" >182</serial_number>
               <value type="Site" >
                <orthogonal type="Point" >
                 <coordinates type="Vector" >
                  <vector type="Container" >
                   <count type="int" >3</count>
                   <item type="float" >5.3407782735657268</item>
                   <item type="float" >1.0044163199999998</item>
                   <item type="float" >-2.2668871268242481</item>
                  </vector>
                 </coordinates>
                </orthogonal>
                <fractional type="Point" >
                 <coordinates type="Vector" >
                  <vector type="Container" >
                   <count type="int" >3</count>
                   <item type="float" >0.36609999999999998</item>
                   <item type="float" >0.1356</item>
                   <item type="float" >-0.06812</item>
                  </vector>
                 </coordinates>
                </fractional>
                <uncertain_value type="UncertainValue" >
                 <value type="float" >1</value>
                 <uncertainty type="Uncertainty" >
                  <precision type="int" >0</precision>
                  <uncertainty type="int" >0</uncertainty>
                 </uncertainty>
                </uncertain_value>
                <uncertainty type="Handle" >
                 <serial_number type="int" >183</serial_number>
                 <value type="Container" >
                  <count type="int" >3</count>
                  <item type="Uncertainty" >
                   <precision type="int" >4</precision>
                   <uncertainty type="int" >3</uncertainty>
                  </item>
                  <item type="Uncertainty" >
                   <precision type="int" >4</precision>
                   <uncertainty type="int" >5</uncertainty>
                  </item>
                  <item type="Uncertainty" >
                   <precision type="int" >5</precision>
                   <uncertainty type="int" >10</uncertainty>
                  </item>
                 </value>
                </uncertainty>
                <adps type="Handle" >
                 <serial_number type="int" >184</serial_number>
                 <value type="AtomicDisplacementParameters" >
                  <uvalues type="Container" >
                   <count type="int" >6</count>
                   <item type="UncertainValue" >
                    <value type="float" >0.043999999999999997</value>
                    <uncertainty type="Uncertainty" >
                     <precision type="int" >3</precision>
                     <uncertainty type="int" >2</uncertainty>
                    </uncertainty>
                   </item>
                   <item type="UncertainValue" >
                    <value type="float" >0.031</value>
                    <uncertainty type="Uncertainty" >
                     <precision type="int" >3</precision>
                     <uncertainty type="int" >2</uncertainty>
                    </uncertainty>
                   </item>
                   <item type="UncertainValue" >
                    <value type="float" >0.028000000000000001</value>
                    <uncertainty type="Uncertainty" >
                     <precision type="int" >3</precision>
                     <uncertainty type="int" >2</uncertainty>
                    </uncertainty>
                   </item>
                   <item type="UncertainValue" >
                    <value type="float" >0.014</value>
                    <uncertainty type="Uncertainty" >
                     <precision type="int" >3</precision>
                     <uncertainty type="int" >2</uncertainty>
                    </uncertainty>
                   </item>
                   <item type="UncertainValue" >
                    <value type="float" >-0.0097999999999999997</value>
                    <uncertainty type="Uncertainty" >
                     <precision type="int" >4</precision>
                     <uncertainty type="int" >18</uncertainty>
                    </uncertainty>
                   </item>
                   <item type="UncertainValue" >
                    <value type="float" >-0.0088999999999999999</value>
                    <uncertainty type="Uncertainty" >
                     <precision type="int" >4</precision>
                     <uncertainty type="int" >17</uncertainty>
                    </uncertainty>
                   </item>
                  </uvalues>
                  <type type="AtomicDisplacementParameters::Type" >
                   <enumerator type="int" >0</enumerator>
                  </type>
                  <u_equivalent type="float" >0.034518617353324184</u_equivalent>
                 </value>
                </adps>
               </value>
              </site>
              <annotations type="Annotations" >
               <annotations type="Container" >
                <count type="int" >1</count>
                <item type="Handle" >
                 <serial_number type="int" >185</serial_number>
                 <value type="FileOrdering" >
                  <value type="Handle" >
                   <serial_number type="int" >186</serial_number>
                   <value type="FileOrdering" >
                    <file_order type="int" >29</file_order>
                   </value>
                  </value>
                 </value>
                </item>
               </annotations>
              </annotations>
             </value>
            </item>
            <item type="Handle" >
             <serial_number type="int" >187</serial_number>
             <value type="Atom3d" >
              <element type="Element" >
               <code type="char" >2</code>
              </element>
              <formal_charge type="int" >0</formal_charge>
              <radius type="float" >0.23000000000000001</radius>
              <label type="string" >H12</label>
              <site type="Handle" >
               <serial_number type="int" >188</serial_number>
               <value type="Site" >
                <orthogonal type="Point" >
                 <coordinates type="Vector" >
                  <vector type="Container" >
                   <count type="int" >3</count>
                   <item type="float" >5.2730159056063073</item>
                   <item type="float" >0.14147751999999983</item>
                   <item type="float" >-2.6589001971999036</item>
                  </vector>
                 </coordinates>
                </orthogonal>
                <fractional type="Point" >
                 <coordinates type="Vector" >
                  <vector type="Container" >
                   <count type="int" >3</count>
                   <item type="float" >0.36070000000000002</item>
                   <item type="float" >0.019099999999999999</item>
                   <item type="float" >-0.079899999999999999</item>
                  </vector>
                 </coordinates>
                </fractional>
                <uncertain_value type="UncertainValue" >
                 <value type="float" >1</value>
                 <uncertainty type="Uncertainty" >
                  <precision type="int" >0</precision>
                  <uncertainty type="int" >0</uncertainty>
                 </uncertainty>
                </uncertain_value>
                <uncertainty type="Handle" >
                 <serial_number type="int" >189</serial_number>
                 <value type="Container" >
                  <count type="int" >3</count>
                  <item type="Uncertainty" >
                   <precision type="int" >4</precision>
                   <uncertainty type="int" >0</uncertainty>
                  </item>
                  <item type="Uncertainty" >
                   <precision type="int" >4</precision>
                   <uncertainty type="int" >0</uncertainty>
                  </item>
                  <item type="Uncertainty" >
                   <precision type="int" >4</precision>
                   <uncertainty type="int" >0</uncertainty>
                  </item>
                 </value>
                </uncertainty>
                <adps type="Handle" >
                 <serial_number type="int" >190</serial_number>
                 <value type="AtomicDisplacementParameters" >
                  <uvalues type="Container" >
                   <count type="int" >6</count>
                   <item type="UncertainValue" >
                    <value type="float" >0.042000000000000023</value>
                    <uncertainty type="Uncertainty" >
                     <precision type="int" >1000000</precision>
                     <uncertainty type="int" >0</uncertainty>
                    </uncertainty>
                   </item>
                   <item type="UncertainValue" >
                    <value type="float" >0.042000000000000016</value>
                    <uncertainty type="Uncertainty" >
                     <precision type="int" >1000000</precision>
                     <uncertainty type="int" >0</uncertainty>
                    </uncertainty>
                   </item>
                   <item type="UncertainValue" >
                    <value type="float" >0.04200000000000001</value>
                    <uncertainty type="Uncertainty" >
                     <precision type="int" >1000000</precision>
                     <uncertainty type="int" >0</uncertainty>
                    </uncertainty>
                   </item>
                   <item type="UncertainValue" >
                    <value type="float" >-2.6392002700617305e-18</value>
                    <uncertainty type="Uncertainty" >
                     <precision type="int" >1000000</precision>
                     <uncertainty type="int" >0</uncertainty>
                    </uncertainty>
                   </item>
                   <item type="UncertainValue" >
                    <value type="float" >0.0010869744001567954</value>
                    <uncertainty type="Uncertainty" >
                     <precision type="int" >1000000</precision>
                     <uncertainty type="int" >0</uncertainty>
                    </uncertainty>
                   </item>
                   <item type="UncertainValue" >
                    <value type="float" >-2.6392002700617309e-18</value>
                    <uncertainty type="Uncertainty" >
                     <precision type="int" >1000000</precision>
                     <uncertainty type="int" >0</uncertainty>
                    </uncertainty>
                   </item>
                  </uvalues>
                  <type type="AtomicDisplacementParameters::Type" >
                   <enumerator type="int" >1</enumerator>
                  </type>
                  <u_equivalent type="float" >0.042000000000000003</u_equivalent>
                 </value>
                </adps>
               </value>
              </site>
              <annotations type="Annotations" >
               <annotations type="Container" >
                <count type="int" >1</count>
                <item type="Handle" >
                 <serial_number type="int" >191</serial_number>
                 <value type="FileOrdering" >
                  <value type="Handle" >
                   <serial_number type="int" >192</serial_number>
                   <value type="FileOrdering" >
                    <file_order type="int" >30</file_order>
                   </value>
                  </value>
                 </value>
                </item>
               </annotations>
              </annotations>
             </value>
            </item>
            <item type="Handle" >
             <serial_number type="int" >193</serial_number>
             <value type="Atom3d" >
              <element type="Element" >
               <code type="char" >1</code>
              </element>
              <formal_charge type="int" >0</formal_charge>
              <radius type="float" >0.68000000000000005</radius>
              <label type="string" >C13</label>
              <site type="Handle" >
               <serial_number type="int" >194</serial_number>
               <value type="Site" >
                <orthogonal type="Point" >
                 <coordinates type="Vector" >
                  <vector type="Container" >
                   <count type="int" >3</count>
                   <item type="float" >6.3418205545422497</item>
                   <item type="float" >1.8103196799999997</item>
                   <item type="float" >-2.646920171280104</item>
                  </vector>
                 </coordinates>
                </orthogonal>
                <fractional type="Point" >
                 <coordinates type="Vector" >
                  <vector type="Container" >
                   <count type="int" >3</count>
                   <item type="float" >0.43480000000000002</item>
                   <item type="float" >0.24440000000000001</item>
                   <item type="float" >-0.07954</item>
                  </vector>
                 </coordinates>
                </fractional>
                <uncertain_value type="UncertainValue" >
                 <value type="float" >1</value>
                 <uncertainty type="Uncertainty" >
                  <precision type="int" >0</precision>
                  <uncertainty type="int" >0</uncertainty>
                 </uncertainty>
                </uncertain_value>
                <uncertainty type="Handle" >
                 <serial_number type="int" >195</serial_number>
                 <value type="Container" >
                  <count type="int" >3</count>
                  <item type="Uncertainty" >
                   <precision type="int" >4</precision>
                   <uncertainty type="int" >3</uncertainty>
                  </item>
                  <item type="Uncertainty" >
                   <precision type="int" >4</precision>
                   <uncertainty type="int" >5</uncertainty>
                  </item>
                  <item type="Uncertainty" >
                   <precision type="int" >5</precision>
                   <uncertainty type="int" >10</uncertainty>
                  </item>
                 </value>
                </uncertainty>
                <adps type="Handle" >
                 <serial_number type="int" >196</serial_number>
                 <value type="AtomicDisplacementParameters" >
                  <uvalues type="Container" >
                   <count type="int" >6</count>
                   <item type="UncertainValue" >
                    <value type="float" >0.037999999999999999</value>
                    <uncertainty type="Uncertainty" >
                     <precision type="int" >3</precision>
                     <uncertainty type="int" >2</uncertainty>
                    </uncertainty>
                   </item>
                   <item type="UncertainValue" >
                    <value type="float" >0.040000000000000001</value>
                    <uncertainty type="Uncertainty" >
                     <precision type="int" >3</precision>
                     <uncertainty type="int" >2</uncertainty>
                    </uncertainty>
                   </item>
                   <item type="UncertainValue" >
                    <value type="float" >0.020299999999999999</value>
                    <uncertainty type="Uncertainty" >
                     <precision type="int" >4</precision>
                     <uncertainty type="int" >19</uncertainty>
                    </uncertainty>
                   </item>
                   <item type="UncertainValue" >
                    <value type="float" >0.017000000000000001</value>
                    <uncertainty type="Uncertainty" >
                     <precision type="int" >3</precision>
                     <uncertainty type="int" >2</uncertainty>
                    </uncertainty>
                   </item>
                   <item type="UncertainValue" >
                    <value type="float" >-0.0033999999999999998</value>
                    <uncertainty type="Uncertainty" >
                     <precision type="int" >4</precision>
                     <uncertainty type="int" >17</uncertainty>
                    </uncertainty>
                   </item>
                   <item type="UncertainValue" >
                    <value type="float" >-0.0025000000000000001</value>
                    <uncertainty type="Uncertainty" >
                     <precision type="int" >4</precision>
                     <uncertainty type="int" >17</uncertainty>
                    </uncertainty>
                   </item>
                  </uvalues>
                  <type type="AtomicDisplacementParameters::Type" >
                   <enumerator type="int" >0</enumerator>
                  </type>
                  <u_equivalent type="float" >0.032838393113010629</u_equivalent>
                 </value>
                </adps>
               </value>
              </site>
              <annotations type="Annotations" >
               <annotations type="Container" >
                <count type="int" >1</count>
                <item type="Handle" >
                 <serial_number type="int" >197</serial_number>
                 <value type="FileOrdering" >
                  <value type="Handle" >
                   <serial_number type="int" >198</serial_number>
                   <value type="FileOrdering" >
                    <file_order type="int" >31</file_order>
                   </value>
                  </value>
                 </value>
                </item>
               </annotations>
              </annotations>
             </value>
            </item>
            <item type="Handle" >
             <serial_number type="int" >199</serial_number>
             <value type="Atom3d" >
              <element type="Element" >
               <code type="char" >2</code>
              </element>
              <formal_charge type="int" >0</formal_charge>
              <radius type="float" >0.23000000000000001</radius>
              <label type="string" >H13</label>
              <site type="Handle" >
               <serial_number type="int" >200</serial_number>
               <value type="Site" >
                <orthogonal type="Point" >
                 <coordinates type="Vector" >
                  <vector type="Container" >
                   <count type="int" >3</count>
                   <item type="float" >6.9590492018361241</item>
                   <item type="float" >1.5118095199999997</item>
                   <item type="float" >-3.3044904828779775</item>
                  </vector>
                 </coordinates>
                </orthogonal>
                <fractional type="Point" >
                 <coordinates type="Vector" >
                  <vector type="Container" >
                   <count type="int" >3</count>
                   <item type="float" >0.47639999999999999</item>
                   <item type="float" >0.2041</item>
                   <item type="float" >-0.099299999999999999</item>
                  </vector>
                 </coordinates>
                </fractional>
                <uncertain_value type="UncertainValue" >
                 <value type="float" >1</value>
                 <uncertainty type="Uncertainty" >
                  <precision type="int" >0</precision>
                  <uncertainty type="int" >0</uncertainty>
                 </uncertainty>
                </uncertain_value>
                <uncertainty type="Handle" >
                 <serial_number type="int" >201</serial_number>
                 <value type="Container" >
                  <count type="int" >3</count>
                  <item type="Uncertainty" >
                   <precision type="int" >4</precision>
                   <uncertainty type="int" >0</uncertainty>
                  </item>
                  <item type="Uncertainty" >
                   <precision type="int" >4</precision>
                   <uncertainty type="int" >0</uncertainty>
                  </item>
                  <item type="Uncertainty" >
                   <precision type="int" >4</precision>
                   <uncertainty type="int" >0</uncertainty>
                  </item>
                 </value>
                </uncertainty>
                <adps type="Handle" >
                 <serial_number type="int" >202</serial_number>
                 <value type="AtomicDisplacementParameters" >
                  <uvalues type="Container" >
                   <count type="int" >6</count>
                   <item type="UncertainValue" >
                    <value type="float" >0.039000000000000007</value>
                    <uncertainty type="Uncertainty" >
                     <precision type="int" >1000000</precision>
                     <uncertainty type="int" >0</uncertainty>
                    </uncertainty>
                   </item>
                   <item type="UncertainValue" >
                    <value type="float" >0.039000000000000014</value>
                    <uncertainty type="Uncertainty" >
                     <precision type="int" >1000000</precision>
                     <uncertainty type="int" >0</uncertainty>
                    </uncertainty>
                   </item>
                   <item type="UncertainValue" >
                    <value type="float" >0.039000000000000014</value>
                    <uncertainty type="Uncertainty" >
                     <precision type="int" >1000000</precision>
                     <uncertainty type="int" >0</uncertainty>
                    </uncertainty>
                   </item>
                   <item type="UncertainValue" >
                    <value type="float" >-2.4506859650573206e-18</value>
                    <uncertainty type="Uncertainty" >
                     <precision type="int" >1000000</precision>
                     <uncertainty type="int" >0</uncertainty>
                    </uncertainty>
                   </item>
                   <item type="UncertainValue" >
                    <value type="float" >0.0010093333715741669</value>
                    <uncertainty type="Uncertainty" >
                     <precision type="int" >1000000</precision>
                     <uncertainty type="int" >0</uncertainty>
                    </uncertainty>
                   </item>
                   <item type="UncertainValue" >
                    <value type="float" >-2.4506859650573214e-18</value>
                    <uncertainty type="Uncertainty" >
                     <precision type="int" >1000000</precision>
                     <uncertainty type="int" >0</uncertainty>
                    </uncertainty>
                   </item>
                  </uvalues>
                  <type type="AtomicDisplacementParameters::Type" >
                   <enumerator type="int" >1</enumerator>
                  </type>
                  <u_equivalent type="float" >0.039</u_equivalent>
                 </value>
                </adps>
               </value>
              </site>
              <annotations type="Annotations" >
               <annotations type="Container" >
                <count type="int" >1</count>
                <item type="Handle" >
                 <serial_number type="int" >203</serial_number>
                 <value type="FileOrdering" >
                  <value type="Handle" >
                   <serial_number type="int" >204</serial_number>
                   <value type="FileOrdering" >
                    <file_order type="int" >32</file_order>
                   </value>
                  </value>
                 </value>
                </item>
               </annotations>
              </annotations>
             </value>
            </item>
            <item type="Handle" >
             <serial_number type="int" >205</serial_number>
             <value type="Atom3d" >
              <element type="Element" >
               <code type="char" >1</code>
              </element>
              <formal_charge type="int" >0</formal_charge>
              <radius type="float" >0.68000000000000005</radius>
              <label type="string" >C14</label>
              <site type="Handle" >
               <serial_number type="int" >206</serial_number>
               <value type="Site" >
                <orthogonal type="Point" >
                 <coordinates type="Vector" >
                  <vector type="Container" >
                   <count type="int" >3</count>
                   <item type="float" >6.4943756412334581</item>
                   <item type="float" >3.1206533599999999</item>
                   <item type="float" >-2.0748739336096871</item>
                  </vector>
                 </coordinates>
                </orthogonal>
                <fractional type="Point" >
                 <coordinates type="Vector" >
                  <vector type="Container" >
                   <count type="int" >3</count>
                   <item type="float" >0.44640000000000002</item>
                   <item type="float" >0.42130000000000001</item>
                   <item type="float" >-0.062350000000000003</item>
                  </vector>
                 </coordinates>
                </fractional>
                <uncertain_value type="UncertainValue" >
                 <value type="float" >1</value>
                 <uncertainty type="Uncertainty" >
                  <precision type="int" >0</precision>
                  <uncertainty type="int" >0</uncertainty>
                 </uncertainty>
                </uncertain_value>
                <uncertainty type="Handle" >
                 <serial_number type="int" >207</serial_number>
                 <value type="Container" >
                  <count type="int" >3</count>
                  <item type="Uncertainty" >
                   <precision type="int" >4</precision>
                   <uncertainty type="int" >2</uncertainty>
                  </item>
                  <item type="Uncertainty" >
                   <precision type="int" >4</precision>
                   <uncertainty type="int" >5</uncertainty>
                  </item>
                  <item type="Uncertainty" >
                   <precision type="int" >5</precision>
                   <uncertainty type="int" >10</uncertainty>
                  </item>
                 </value>
                </uncertainty>
                <adps type="Handle" >
                 <serial_number type="int" >208</serial_number>
                 <value type="AtomicDisplacementParameters" >
                  <uvalues type="Container" >
                   <count type="int" >6</count>
                   <item type="UncertainValue" >
                    <value type="float" >0.034000000000000002</value>
                    <uncertainty type="Uncertainty" >
                     <precision type="int" >3</precision>
                     <uncertainty type="int" >2</uncertainty>
                    </uncertainty>
                   </item>
                   <item type="UncertainValue" >
                    <value type="float" >0.036999999999999998</value>
                    <uncertainty type="Uncertainty" >
                     <precision type="int" >3</precision>
                     <uncertainty type="int" >2</uncertainty>
                    </uncertainty>
                   </item>
                   <item type="UncertainValue" >
                    <value type="float" >0.0206</value>
                    <uncertainty type="Uncertainty" >
                     <precision type="int" >4</precision>
                     <uncertainty type="int" >18</uncertainty>
                    </uncertainty>
                   </item>
                   <item type="UncertainValue" >
                    <value type="float" >0.0063</value>
                    <uncertainty type="Uncertainty" >
                     <precision type="int" >4</precision>
                     <uncertainty type="int" >19</uncertainty>
                    </uncertainty>
                   </item>
                   <item type="UncertainValue" >
                    <value type="float" >-0.0082000000000000007</value>
                    <uncertainty type="Uncertainty" >
                     <precision type="int" >4</precision>
                     <uncertainty type="int" >17</uncertainty>
                    </uncertainty>
                   </item>
                   <item type="UncertainValue" >
                    <value type="float" >0.0016999999999999999</value>
                    <uncertainty type="Uncertainty" >
                     <precision type="int" >4</precision>
                     <uncertainty type="int" >17</uncertainty>
                    </uncertainty>
                   </item>
                  </uvalues>
                  <type type="AtomicDisplacementParameters::Type" >
                   <enumerator type="int" >0</enumerator>
                  </type>
                  <u_equivalent type="float" >0.030687105753600299</u_equivalent>
                 </value>
                </adps>
               </value>
              </site>
              <annotations type="Annotations" >
               <annotations type="Container" >
                <count type="int" >1</count>
                <item type="Handle" >
                 <serial_number type="int" >209</serial_number>
                 <value type="FileOrdering" >
                  <value type="Handle" >
                   <serial_number type="int" >210</serial_number>
                   <value type="FileOrdering" >
                    <file_order type="int" >33</file_order>
                   </value>
                  </value>
                 </value>
                </item>
               </annotations>
              </annotations>
             </value>
            </item>
            <item type="Handle" >
             <serial_number type="int" >211</serial_number>
             <value type="Atom3d" >
              <element type="Element" >
               <code type="char" >1</code>
              </element>
              <formal_charge type="int" >0</formal_charge>
              <radius type="float" >0.68000000000000005</radius>
              <label type="string" >C15</label>
              <site type="Handle" >
               <serial_number type="int" >212</serial_number>
               <value type="Site" >
                <orthogonal type="Point" >
                 <coordinates type="Vector" >
                  <vector type="Container" >
                   <count type="int" >3</count>
                   <item type="float" >7.5540558037698808</item>
                   <item type="float" >3.9658148799999995</item>
                   <item type="float" >-2.4349402681992105</item>
                  </vector>
                 </coordinates>
                </orthogonal>
                <fractional type="Point" >
                 <coordinates type="Vector" >
                  <vector type="Container" >
                   <count type="int" >3</count>
                   <item type="float" >0.51919999999999999</item>
                   <item type="float" >0.53539999999999999</item>
                   <item type="float" >-0.073169999999999999</item>
                  </vector>
                 </coordinates>
                </fractional>
                <uncertain_value type="UncertainValue" >
                 <value type="float" >1</value>
                 <uncertainty type="Uncertainty" >
                  <precision type="int" >0</precision>
                  <uncertainty type="int" >0</uncertainty>
                 </uncertainty>
                </uncertain_value>
                <uncertainty type="Handle" >
                 <serial_number type="int" >213</serial_number>
                 <value type="Container" >
                  <count type="int" >3</count>
                  <item type="Uncertainty" >
                   <precision type="int" >4</precision>
                   <uncertainty type="int" >3</uncertainty>
                  </item>
                  <item type="Uncertainty" >
                   <precision type="int" >4</precision>
                   <uncertainty type="int" >5</uncertainty>
                  </item>
                  <item type="Uncertainty" >
                   <precision type="int" >5</precision>
                   <uncertainty type="int" >10</uncertainty>
                  </item>
                 </value>
                </uncertainty>
                <adps type="Handle" >
                 <serial_number type="int" >214</serial_number>
                 <value type="AtomicDisplacementParameters" >
                  <uvalues type="Container" >
                   <count type="int" >6</count>
                   <item type="UncertainValue" >
                    <value type="float" >0.036999999999999998</value>
                    <uncertainty type="Uncertainty" >
                     <precision type="int" >3</precision>
                     <uncertainty type="int" >2</uncertainty>
                    </uncertainty>
                   </item>
                   <item type="UncertainValue" >
                    <value type="float" >0.043999999999999997</value>
                    <uncertainty type="Uncertainty" >
                     <precision type="int" >3</precision>
                     <uncertainty type="int" >3</uncertainty>
                    </uncertainty>
                   </item>
                   <item type="UncertainValue" >
                    <value type="float" >0.016899999999999998</value>
                    <uncertainty type="Uncertainty" >
                     <precision type="int" >4</precision>
                     <uncertainty type="int" >18</uncertainty>
                    </uncertainty>
                   </item>
                   <item type="UncertainValue" >
                    <value type="float" >0.0064999999999999997</value>
                    <uncertainty type="Uncertainty" >
                     <precision type="int" >4</precision>
                     <uncertainty type="int" >19</uncertainty>
                    </uncertainty>
                   </item>
                   <item type="UncertainValue" >
                    <value type="float" >-0.0047999999999999996</value>
                    <uncertainty type="Uncertainty" >
                     <precision type="int" >4</precision>
                     <uncertainty type="int" >16</uncertainty>
                    </uncertainty>
                   </item>
                   <item type="UncertainValue" >
                    <value type="float" >0.0068999999999999999</value>
                    <uncertainty type="Uncertainty" >
                     <precision type="int" >4</precision>
                     <uncertainty type="int" >17</uncertainty>
                    </uncertainty>
                   </item>
                  </uvalues>
                  <type type="AtomicDisplacementParameters::Type" >
                   <enumerator type="int" >0</enumerator>
                  </type>
                  <u_equivalent type="float" >0.032728247935777298</u_equivalent>
                 </value>
                </adps>
               </value>
              </site>
              <annotations type="Annotations" >
               <annotations type="Container" >
                <count type="int" >1</count>
                <item type="Handle" >
                 <serial_number type="int" >215</serial_number>
                 <value type="FileOrdering" >
                  <value type="Handle" >
                   <serial_number type="int" >216</serial_number>
                   <value type="FileOrdering" >
                    <file_order type="int" >34</file_order>
                   </value>
                  </value>
                 </value>
                </item>
               </annotations>
              </annotations>
             </value>
            </item>
            <item type="Handle" >
             <serial_number type="int" >217</serial_number>
             <value type="Atom3d" >
              <element type="Element" >
               <code type="char" >2</code>
              </element>
              <formal_charge type="int" >0</formal_charge>
              <radius type="float" >0.23000000000000001</radius>
              <label type="string" >H15</label>
              <site type="Handle" >
               <serial_number type="int" >218</serial_number>
               <value type="Site" >
                <orthogonal type="Point" >
                 <coordinates type="Vector" >
                  <vector type="Container" >
                   <count type="int" >3</count>
                   <item type="float" >8.1868709459217008</item>
                   <item type="float" >3.6806376799999998</item>
                   <item type="float" >-3.0815288893706017</item>
                  </vector>
                 </coordinates>
                </orthogonal>
                <fractional type="Point" >
                 <coordinates type="Vector" >
                  <vector type="Container" >
                   <count type="int" >3</count>
                   <item type="float" >0.56189999999999996</item>
                   <item type="float" >0.49690000000000001</item>
                   <item type="float" >-0.092600000000000002</item>
                  </vector>
                 </coordinates>
                </fractional>
                <uncertain_value type="UncertainValue" >
                 <value type="float" >1</value>
                 <uncertainty type="Uncertainty" >
                  <precision type="int" >0</precision>
                  <uncertainty type="int" >0</uncertainty>
                 </uncertainty>
                </uncertain_value>
                <uncertainty type="Handle" >
                 <serial_number type="int" >219</serial_number>
                 <value type="Container" >
                  <count type="int" >3</count>
                  <item type="Uncertainty" >
                   <precision type="int" >4</precision>
                   <uncertainty type="int" >0</uncertainty>
                  </item>
                  <item type="Uncertainty" >
                   <precision type="int" >4</precision>
                   <uncertainty type="int" >0</uncertainty>
                  </item>
                  <item type="Uncertainty" >
                   <precision type="int" >4</precision>
                   <uncertainty type="int" >0</uncertainty>
                  </item>
                 </value>
                </uncertainty>
                <adps type="Handle" >
                 <serial_number type="int" >220</serial_number>
                 <value type="AtomicDisplacementParameters" >
                  <uvalues type="Container" >
                   <count type="int" >6</count>
                   <item type="UncertainValue" >
                    <value type="float" >0.039000000000000007</value>
                    <uncertainty type="Uncertainty" >
                     <precision type="int" >1000000</precision>
                     <uncertainty type="int" >0</uncertainty>
                    </uncertainty>
                   </item>
                   <item type="UncertainValue" >
                    <value type="float" >0.039000000000000014</value>
                    <uncertainty type="Uncertainty" >
                     <precision type="int" >1000000</precision>
                     <uncertainty type="int" >0</uncertainty>
                    </uncertainty>
                   </item>
                   <item type="UncertainValue" >
                    <value type="float" >0.039000000000000014</value>
                    <uncertainty type="Uncertainty" >
                     <precision type="int" >1000000</precision>
                     <uncertainty type="int" >0</uncertainty>
                    </uncertainty>
                   </item>
                   <item type="UncertainValue" >
                    <value type="float" >-2.4506859650573206e-18</value>
                    <uncertainty type="Uncertainty" >
                     <precision type="int" >1000000</precision>
                     <uncertainty type="int" >0</uncertainty>
                    </uncertainty>
                   </item>
                   <item type="UncertainValue" >
                    <value type="float" >0.0010093333715741669</value>
                    <uncertainty type="Uncertainty" >
                     <precision type="int" >1000000</precision>
                     <uncertainty type="int" >0</uncertainty>
                    </uncertainty>
                   </item>
                   <item type="UncertainValue" >
                    <value type="float" >-2.4506859650573214e-18</value>
                    <uncertainty type="Uncertainty" >
                     <precision type="int" >1000000</precision>
                     <uncertainty type="int" >0</uncertainty>
                    </uncertainty>
                   </item>
                  </uvalues>
                  <type type="AtomicDisplacementParameters::Type" >
                   <enumerator type="int" >1</enumerator>
                  </type>
                  <u_equivalent type="float" >0.039</u_equivalent>
                 </value>
                </adps>
               </value>
              </site>
              <annotations type="Annotations" >
               <annotations type="Container" >
                <count type="int" >1</count>
                <item type="Handle" >
                 <serial_number type="int" >221</serial_number>
                 <value type="FileOrdering" >
                  <value type="Handle" >
                   <serial_number type="int" >222</serial_number>
                   <value type="FileOrdering" >
                    <file_order type="int" >35</file_order>
                   </value>
                  </value>
                 </value>
                </item>
               </annotations>
              </annotations>
             </value>
            </item>
            <item type="Handle" >
             <serial_number type="int" >223</serial_number>
             <value type="Atom3d" >
              <element type="Element" >
               <code type="char" >1</code>
              </element>
              <formal_charge type="int" >0</formal_charge>
              <radius type="float" >0.68000000000000005</radius>
              <label type="string" >C16</label>
              <site type="Handle" >
               <serial_number type="int" >224</serial_number>
               <value type="Site" >
                <orthogonal type="Point" >
                 <coordinates type="Vector" >
                  <vector type="Container" >
                   <count type="int" >3</count>
                   <item type="float" >7.6789909230850517</item>
                   <item type="float" >5.2057801599999998</item>
                   <item type="float" >-1.8549073465822605</item>
                  </vector>
                 </coordinates>
                </orthogonal>
                <fractional type="Point" >
                 <coordinates type="Vector" >
                  <vector type="Container" >
                   <count type="int" >3</count>
                   <item type="float" >0.52890000000000004</item>
                   <item type="float" >0.70279999999999998</item>
                   <item type="float" >-0.055739999999999998</item>
                  </vector>
                 </coordinates>
                </fractional>
                <uncertain_value type="UncertainValue" >
                 <value type="float" >1</value>
                 <uncertainty type="Uncertainty" >
                  <precision type="int" >0</precision>
                  <uncertainty type="int" >0</uncertainty>
                 </uncertainty>
                </uncertain_value>
                <uncertainty type="Handle" >
                 <serial_number type="int" >225</serial_number>
                 <value type="Container" >
                  <count type="int" >3</count>
                  <item type="Uncertainty" >
                   <precision type="int" >4</precision>
                   <uncertainty type="int" >2</uncertainty>
                  </item>
                  <item type="Uncertainty" >
                   <precision type="int" >4</precision>
                   <uncertainty type="int" >5</uncertainty>
                  </item>
                  <item type="Uncertainty" >
                   <precision type="int" >5</precision>
                   <uncertainty type="int" >10</uncertainty>
                  </item>
                 </value>
                </uncertainty>
                <adps type="Handle" >
                 <serial_number type="int" >226</serial_number>
                 <value type="AtomicDisplacementParameters" >
                  <uvalues type="Container" >
                   <count type="int" >6</count>
                   <item type="UncertainValue" >
                    <value type="float" >0.029999999999999999</value>
                    <uncertainty type="Uncertainty" >
                     <precision type="int" >3</precision>
                     <uncertainty type="int" >2</uncertainty>
                    </uncertainty>
                   </item>
                   <item type="UncertainValue" >
                    <value type="float" >0.047</value>
                    <uncertainty type="Uncertainty" >
                     <precision type="int" >3</precision>
                     <uncertainty type="int" >3</uncertainty>
                    </uncertainty>
                   </item>
                   <item type="UncertainValue" >
                    <value type="float" >0.025999999999999999</value>
                    <uncertainty type="Uncertainty" >
                     <precision type="int" >3</precision>
                     <uncertainty type="int" >2</uncertainty>
                    </uncertainty>
                   </item>
                   <item type="UncertainValue" >
                    <value type="float" >-0.00029999999999999997</value>
                    <uncertainty type="Uncertainty" >
                     <precision type="int" >4</precision>
                     <uncertainty type="int" >19</uncertainty>
                    </uncertainty>
                   </item>
                   <item type="UncertainValue" >
                    <value type="float" >-0.0067999999999999996</value>
                    <uncertainty type="Uncertainty" >
                     <precision type="int" >4</precision>
                     <uncertainty type="int" >17</uncertainty>
                    </uncertainty>
                   </item>
                   <item type="UncertainValue" >
                    <value type="float" >0.012699999999999999</value>
                    <uncertainty type="Uncertainty" >
                     <precision type="int" >4</precision>
                     <uncertainty type="int" >18</uncertainty>
                    </uncertainty>
                   </item>
                  </uvalues>
                  <type type="AtomicDisplacementParameters::Type" >
                   <enumerator type="int" >0</enumerator>
                  </type>
                  <u_equivalent type="float" >0.034463247356431505</u_equivalent>
                 </value>
                </adps>
               </value>
              </site>
              <annotations type="Annotations" >
               <annotations type="Container" >
                <count type="int" >1</count>
                <item type="Handle" >
                 <serial_number type="int" >227</serial_number>
                 <value type="FileOrdering" >
                  <value type="Handle" >
                   <serial_number type="int" >228</serial_number>
                   <value type="FileOrdering" >
                    <file_order type="int" >36</file_order>
                   </value>
                  </value>
                 </value>
                </item>
               </annotations>
              </annotations>
             </value>
            </item>
            <item type="Handle" >
             <serial_number type="int" >229</serial_number>
             <value type="Atom3d" >
              <element type="Element" >
               <code type="char" >2</code>
              </element>
              <formal_charge type="int" >0</formal_charge>
              <radius type="float" >0.23000000000000001</radius>
              <label type="string" >H16</label>
              <site type="Handle" >
               <serial_number type="int" >230</serial_number>
               <value type="Site" >
                <orthogonal type="Point" >
                 <coordinates type="Vector" >
                  <vector type="Container" >
                   <count type="int" >3</count>
                   <item type="float" >8.4066456362102286</item>
                   <item type="float" >5.7665051999999992</item>
                   <item type="float" >-2.09650453596488</item>
                  </vector>
                 </coordinates>
                </orthogonal>
                <fractional type="Point" >
                 <coordinates type="Vector" >
                  <vector type="Container" >
                   <count type="int" >3</count>
                   <item type="float" >0.57889999999999997</item>
                   <item type="float" >0.77849999999999997</item>
                   <item type="float" >-0.063</item>
                  </vector>
                 </coordinates>
                </fractional>
                <uncertain_value type="UncertainValue" >
                 <value type="float" >1</value>
                 <uncertainty type="Uncertainty" >
                  <precision type="int" >0</precision>
                  <uncertainty type="int" >0</uncertainty>
                 </uncertainty>
                </uncertain_value>
                <uncertainty type="Handle" >
                 <serial_number type="int" >231</serial_number>
                 <value type="Container" >
                  <count type="int" >3</count>
                  <item type="Uncertainty" >
                   <precision type="int" >4</precision>
                   <uncertainty type="int" >0</uncertainty>
                  </item>
                  <item type="Uncertainty" >
                   <precision type="int" >4</precision>
                   <uncertainty type="int" >0</uncertainty>
                  </item>
                  <item type="Uncertainty" >
                   <precision type="int" >4</precision>
                   <uncertainty type="int" >0</uncertainty>
                  </item>
                 </value>
                </uncertainty>
                <adps type="Handle" >
                 <serial_number type="int" >232</serial_number>
                 <value type="AtomicDisplacementParameters" >
                  <uvalues type="Container" >
                   <count type="int" >6</count>
                   <item type="UncertainValue" >
                    <value type="float" >0.042000000000000023</value>
                    <uncertainty type="Uncertainty" >
                     <precision type="int" >1000000</precision>
                     <uncertainty type="int" >0</uncertainty>
                    </uncertainty>
                   </item>
                   <item type="UncertainValue" >
                    <value type="float" >0.042000000000000016</value>
                    <uncertainty type="Uncertainty" >
                     <precision type="int" >1000000</precision>
                     <uncertainty type="int" >0</uncertainty>
                    </uncertainty>
                   </item>
                   <item type="UncertainValue" >
                    <value type="float" >0.04200000000000001</value>
                    <uncertainty type="Uncertainty" >
                     <precision type="int" >1000000</precision>
                     <uncertainty type="int" >0</uncertainty>
                    </uncertainty>
                   </item>
                   <item type="UncertainValue" >
                    <value type="float" >-2.6392002700617305e-18</value>
                    <uncertainty type="Uncertainty" >
                     <precision type="int" >1000000</precision>
                     <uncertainty type="int" >0</uncertainty>
                    </uncertainty>
                   </item>
                   <item type="UncertainValue" >
                    <value type="float" >0.0010869744001567954</value>
                    <uncertainty type="Uncertainty" >
                     <precision type="int" >1000000</precision>
                     <uncertainty type="int" >0</uncertainty>
                    </uncertainty>
                   </item>
                   <item type="UncertainValue" >
                    <value type="float" >-2.6392002700617309e-18</value>
                    <uncertainty type="Uncertainty" >
                     <precision type="int" >1000000</precision>
                     <uncertainty type="int" >0</uncertainty>
                    </uncertainty>
                   </item>
                  </uvalues>
                  <type type="AtomicDisplacementParameters::Type" >
                   <enumerator type="int" >1</enumerator>
                  </type>
                  <u_equivalent type="float" >0.042000000000000003</u_equivalent>
                 </value>
                </adps>
               </value>
              </site>
              <annotations type="Annotations" >
               <annotations type="Container" >
                <count type="int" >1</count>
                <item type="Handle" >
                 <serial_number type="int" >233</serial_number>
                 <value type="FileOrdering" >
                  <value type="Handle" >
                   <serial_number type="int" >234</serial_number>
                   <value type="FileOrdering" >
                    <file_order type="int" >37</file_order>
                   </value>
                  </value>
                 </value>
                </item>
               </annotations>
              </annotations>
             </value>
            </item>
            <item type="Handle" >
             <serial_number type="int" >235</serial_number>
             <value type="Atom3d" >
              <element type="Element" >
               <code type="char" >1</code>
              </element>
              <formal_charge type="int" >0</formal_charge>
              <radius type="float" >0.68000000000000005</radius>
              <label type="string" >C17</label>
              <site type="Handle" >
               <serial_number type="int" >236</serial_number>
               <value type="Site" >
                <orthogonal type="Point" >
                 <coordinates type="Vector" >
                  <vector type="Container" >
                   <count type="int" >3</count>
                   <item type="float" >6.7516063400884923</item>
                   <item type="float" >5.6472492799999996</item>
                   <item type="float" >-0.92046532483791399</item>
                  </vector>
                 </coordinates>
                </orthogonal>
                <fractional type="Point" >
                 <coordinates type="Vector" >
                  <vector type="Container" >
                   <count type="int" >3</count>
                   <item type="float" >0.46629999999999999</item>
                   <item type="float" >0.76239999999999997</item>
                   <item type="float" >-0.027660000000000001</item>
                  </vector>
                 </coordinates>
                </fractional>
                <uncertain_value type="UncertainValue" >
                 <value type="float" >1</value>
                 <uncertainty type="Uncertainty" >
                  <precision type="int" >0</precision>
                  <uncertainty type="int" >0</uncertainty>
                 </uncertainty>
                </uncertain_value>
                <uncertainty type="Handle" >
                 <serial_number type="int" >237</serial_number>
                 <value type="Container" >
                  <count type="int" >3</count>
                  <item type="Uncertainty" >
                   <precision type="int" >4</precision>
                   <uncertainty type="int" >2</uncertainty>
                  </item>
                  <item type="Uncertainty" >
                   <precision type="int" >4</precision>
                   <uncertainty type="int" >5</uncertainty>
                  </item>
                  <item type="Uncertainty" >
                   <precision type="int" >5</precision>
                   <uncertainty type="int" >10</uncertainty>
                  </item>
                 </value>
                </uncertainty>
                <adps type="Handle" >
                 <serial_number type="int" >238</serial_number>
                 <value type="AtomicDisplacementParameters" >
                  <uvalues type="Container" >
                   <count type="int" >6</count>
                   <item type="UncertainValue" >
                    <value type="float" >0.039</value>
                    <uncertainty type="Uncertainty" >
                     <precision type="int" >3</precision>
                     <uncertainty type="int" >2</uncertainty>
                    </uncertainty>
                   </item>
                   <item type="UncertainValue" >
                    <value type="float" >0.031</value>
                    <uncertainty type="Uncertainty" >
                     <precision type="int" >3</precision>
                     <uncertainty type="int" >2</uncertainty>
                    </uncertainty>
                   </item>
                   <item type="UncertainValue" >
                    <value type="float" >0.028000000000000001</value>
                    <uncertainty type="Uncertainty" >
                     <precision type="int" >3</precision>
                     <uncertainty type="int" >2</uncertainty>
                    </uncertainty>
                   </item>
                   <item type="UncertainValue" >
                    <value type="float" >-0.0033999999999999998</value>
                    <uncertainty type="Uncertainty" >
                     <precision type="int" >4</precision>
                     <uncertainty type="int" >18</uncertainty>
                    </uncertainty>
                   </item>
                   <item type="UncertainValue" >
                    <value type="float" >-0.0109</value>
                    <uncertainty type="Uncertainty" >
                     <precision type="int" >4</precision>
                     <uncertainty type="int" >18</uncertainty>
                    </uncertainty>
                   </item>
                   <item type="UncertainValue" >
                    <value type="float" >0.0055999999999999999</value>
                    <uncertainty type="Uncertainty" >
                     <precision type="int" >4</precision>
                     <uncertainty type="int" >16</uncertainty>
                    </uncertainty>
                   </item>
                  </uvalues>
                  <type type="AtomicDisplacementParameters::Type" >
                   <enumerator type="int" >0</enumerator>
                  </type>
                  <u_equivalent type="float" >0.032869825256757849</u_equivalent>
                 </value>
                </adps>
               </value>
              </site>
              <annotations type="Annotations" >
               <annotations type="Container" >
                <count type="int" >1</count>
                <item type="Handle" >
                 <serial_number type="int" >239</serial_number>
                 <value type="FileOrdering" >
                  <value type="Handle" >
                   <serial_number type="int" >240</serial_number>
                   <value type="FileOrdering" >
                    <file_order type="int" >38</file_order>
                   </value>
                  </value>
                 </value>
                </item>
               </annotations>
              </annotations>
             </value>
            </item>
            <item type="Handle" >
             <serial_number type="int" >241</serial_number>
             <value type="Atom3d" >
              <element type="Element" >
               <code type="char" >2</code>
              </element>
              <formal_charge type="int" >0</formal_charge>
              <radius type="float" >0.23000000000000001</radius>
              <label type="string" >H17</label>
              <site type="Handle" >
               <serial_number type="int" >242</serial_number>
               <value type="Site" >
                <orthogonal type="Point" >
                 <coordinates type="Vector" >
                  <vector type="Container" >
                   <count type="int" >3</count>
                   <item type="float" >6.8442581509559801</item>
                   <item type="float" >6.513150959999999</item>
                   <item type="float" >-0.54242895136869118</item>
                  </vector>
                 </coordinates>
                </orthogonal>
                <fractional type="Point" >
                 <coordinates type="Vector" >
                  <vector type="Container" >
                   <count type="int" >3</count>
                   <item type="float" >0.47339999999999999</item>
                   <item type="float" >0.87929999999999997</item>
                   <item type="float" >-0.016299999999999999</item>
                  </vector>
                 </coordinates>
                </fractional>
                <uncertain_value type="UncertainValue" >
                 <value type="float" >1</value>
                 <uncertainty type="Uncertainty" >
                  <precision type="int" >0</precision>
                  <uncertainty type="int" >0</uncertainty>
                 </uncertainty>
                </uncertain_value>
                <uncertainty type="Handle" >
                 <serial_number type="int" >243</serial_number>
                 <value type="Container" >
                  <count type="int" >3</count>
                  <item type="Uncertainty" >
                   <precision type="int" >4</precision>
                   <uncertainty type="int" >0</uncertainty>
                  </item>
                  <item type="Uncertainty" >
                   <precision type="int" >4</precision>
                   <uncertainty type="int" >0</uncertainty>
                  </item>
                  <item type="Uncertainty" >
                   <precision type="int" >4</precision>
                   <uncertainty type="int" >0</uncertainty>
                  </item>
                 </value>
                </uncertainty>
                <adps type="Handle" >
                 <serial_number type="int" >244</serial_number>
                 <value type="AtomicDisplacementParameters" >
                  <uvalues type="Container" >
                   <count type="int" >6</count>
                   <item type="UncertainValue" >
                    <value type="float" >0.039000000000000007</value>
                    <uncertainty type="Uncertainty" >
                     <precision type="int" >1000000</precision>
                     <uncertainty type="int" >0</uncertainty>
                    </uncertainty>
                   </item>
                   <item type="UncertainValue" >
                    <value type="float" >0.039000000000000014</value>
                    <uncertainty type="Uncertainty" >
                     <precision type="int" >1000000</precision>
                     <uncertainty type="int" >0</uncertainty>
                    </uncertainty>
                   </item>
                   <item type="UncertainValue" >
                    <value type="float" >0.039000000000000014</value>
                    <uncertainty type="Uncertainty" >
                     <precision type="int" >1000000</precision>
                     <uncertainty type="int" >0</uncertainty>
                    </uncertainty>
                   </item>
                   <item type="UncertainValue" >
                    <value type="float" >-2.4506859650573206e-18</value>
                    <uncertainty type="Uncertainty" >
                     <precision type="int" >1000000</precision>
                     <uncertainty type="int" >0</uncertainty>
                    </uncertainty>
                   </item>
                   <item type="UncertainValue" >
                    <value type="float" >0.0010093333715741669</value>
                    <uncertainty type="Uncertainty" >
                     <precision type="int" >1000000</precision>
                     <uncertainty type="int" >0</uncertainty>
                    </uncertainty>
                   </item>
                   <item type="UncertainValue" >
                    <value type="float" >-2.4506859650573214e-18</value>
                    <uncertainty type="Uncertainty" >
                     <precision type="int" >1000000</precision>
                     <uncertainty type="int" >0</uncertainty>
                    </uncertainty>
                   </item>
                  </uvalues>
                  <type type="AtomicDisplacementParameters::Type" >
                   <enumerator type="int" >1</enumerator>
                  </type>
                  <u_equivalent type="float" >0.039</u_equivalent>
                 </value>
                </adps>
               </value>
              </site>
              <annotations type="Annotations" >
               <annotations type="Container" >
                <count type="int" >1</count>
                <item type="Handle" >
                 <serial_number type="int" >245</serial_number>
                 <value type="FileOrdering" >
                  <value type="Handle" >
                   <serial_number type="int" >246</serial_number>
                   <value type="FileOrdering" >
                    <file_order type="int" >39</file_order>
                   </value>
                  </value>
                 </value>
                </item>
               </annotations>
              </annotations>
             </value>
            </item>
            <item type="Handle" >
             <serial_number type="int" >247</serial_number>
             <value type="Atom3d" >
              <element type="Element" >
               <code type="char" >1</code>
              </element>
              <formal_charge type="int" >0</formal_charge>
              <radius type="float" >0.68000000000000005</radius>
              <label type="string" >C18</label>
              <site type="Handle" >
               <serial_number type="int" >248</serial_number>
               <value type="Site" >
                <orthogonal type="Point" >
                 <coordinates type="Vector" >
                  <vector type="Container" >
                   <count type="int" >3</count>
                   <item type="float" >5.6824595386625818</item>
                   <item type="float" >4.8302351200000002</item>
                   <item type="float" >-0.52911781145780312</item>
                  </vector>
                 </coordinates>
                </orthogonal>
                <fractional type="Point" >
                 <coordinates type="Vector" >
                  <vector type="Container" >
                   <count type="int" >3</count>
                   <item type="float" >0.39290000000000003</item>
                   <item type="float" >0.65210000000000001</item>
                   <item type="float" >-0.015900000000000001</item>
                  </vector>
                 </coordinates>
                </fractional>
                <uncertain_value type="UncertainValue" >
                 <value type="float" >1</value>
                 <uncertainty type="Uncertainty" >
                  <precision type="int" >0</precision>
                  <uncertainty type="int" >0</uncertainty>
                 </uncertainty>
                </uncertain_value>
                <uncertainty type="Handle" >
                 <serial_number type="int" >249</serial_number>
                 <value type="Container" >
                  <count type="int" >3</count>
                  <item type="Uncertainty" >
                   <precision type="int" >4</precision>
                   <uncertainty type="int" >2</uncertainty>
                  </item>
                  <item type="Uncertainty" >
                   <precision type="int" >4</precision>
                   <uncertainty type="int" >4</uncertainty>
                  </item>
                  <item type="Uncertainty" >
                   <precision type="int" >5</precision>
                   <uncertainty type="int" >9</uncertainty>
                  </item>
                 </value>
                </uncertainty>
                <adps type="Handle" >
                 <serial_number type="int" >250</serial_number>
                 <value type="AtomicDisplacementParameters" >
                  <uvalues type="Container" >
                   <count type="int" >6</count>
                   <item type="UncertainValue" >
                    <value type="float" >0.027</value>
                    <uncertainty type="Uncertainty" >
                     <precision type="int" >3</precision>
                     <uncertainty type="int" >2</uncertainty>
                    </uncertainty>
                   </item>
                   <item type="UncertainValue" >
                    <value type="float" >0.028000000000000001</value>
                    <uncertainty type="Uncertainty" >
                     <precision type="int" >3</precision>
                     <uncertainty type="int" >2</uncertainty>
                    </uncertainty>
                   </item>
                   <item type="UncertainValue" >
                    <value type="float" >0.0184</value>
                    <uncertainty type="Uncertainty" >
                     <precision type="int" >4</precision>
                     <uncertainty type="int" >17</uncertainty>
                    </uncertainty>
                   </item>
                   <item type="UncertainValue" >
                    <value type="float" >0.0023</value>
                    <uncertainty type="Uncertainty" >
                     <precision type="int" >4</precision>
                     <uncertainty type="int" >17</uncertainty>
                    </uncertainty>
                   </item>
                   <item type="UncertainValue" >
                    <value type="float" >-0.0123</value>
                    <uncertainty type="Uncertainty" >
                     <precision type="int" >4</precision>
                     <uncertainty type="int" >15</uncertainty>
                    </uncertainty>
                   </item>
                   <item type="UncertainValue" >
                    <value type="float" >0.0061999999999999998</value>
                    <uncertainty type="Uncertainty" >
                     <precision type="int" >4</precision>
                     <uncertainty type="int" >15</uncertainty>
                    </uncertainty>
                   </item>
                  </uvalues>
                  <type type="AtomicDisplacementParameters::Type" >
                   <enumerator type="int" >0</enumerator>
                  </type>
                  <u_equivalent type="float" >0.02468917069739671</u_equivalent>
                 </value>
                </adps>
               </value>
              </site>
              <annotations type="Annotations" >
               <annotations type="Container" >
                <count type="int" >1</count>
                <item type="Handle" >
                 <serial_number type="int" >251</serial_number>
                 <value type="FileOrdering" >
                  <value type="Handle" >
                   <serial_number type="int" >252</serial_number>
                   <value type="FileOrdering" >
                    <file_order type="int" >40</file_order>
                   </value>
                  </value>
                 </value>
                </item>
               </annotations>
              </annotations>
             </value>
            </item>
            <item type="Handle" >
             <serial_number type="int" >253</serial_number>
             <value type="Atom3d" >
              <element type="Element" >
               <code type="char" >1</code>
              </element>
              <formal_charge type="int" >0</formal_charge>
              <radius type="float" >0.68000000000000005</radius>
              <label type="string" >C19</label>
              <site type="Handle" >
               <serial_number type="int" >254</serial_number>
               <value type="Site" >
                <orthogonal type="Point" >
                 <coordinates type="Vector" >
                  <vector type="Container" >
                   <count type="int" >3</count>
                   <item type="float" >4.7124756086205473</item>
                   <item type="float" >5.245038319999999</item>
                   <item type="float" >0.43460871809049739</item>
                  </vector>
                 </coordinates>
                </orthogonal>
                <fractional type="Point" >
                 <coordinates type="Vector" >
                  <vector type="Container" >
                   <count type="int" >3</count>
                   <item type="float" >0.32740000000000002</item>
                   <item type="float" >0.70809999999999995</item>
                   <item type="float" >0.01306</item>
                  </vector>
                 </coordinates>
                </fractional>
                <uncertain_value type="UncertainValue" >
                 <value type="float" >1</value>
                 <uncertainty type="Uncertainty" >
                  <precision type="int" >0</precision>
                  <uncertainty type="int" >0</uncertainty>
                 </uncertainty>
                </uncertain_value>
                <uncertainty type="Handle" >
                 <serial_number type="int" >255</serial_number>
                 <value type="Container" >
                  <count type="int" >3</count>
                  <item type="Uncertainty" >
                   <precision type="int" >4</precision>
                   <uncertainty type="int" >2</uncertainty>
                  </item>
                  <item type="Uncertainty" >
                   <precision type="int" >4</precision>
                   <uncertainty type="int" >5</uncertainty>
                  </item>
                  <item type="Uncertainty" >
                   <precision type="int" >5</precision>
                   <uncertainty type="int" >9</uncertainty>
                  </item>
                 </value>
                </uncertainty>
                <adps type="Handle" >
                 <serial_number type="int" >256</serial_number>
                 <value type="AtomicDisplacementParameters" >
                  <uvalues type="Container" >
                   <count type="int" >6</count>
                   <item type="UncertainValue" >
                    <value type="float" >0.031</value>
                    <uncertainty type="Uncertainty" >
                     <precision type="int" >3</precision>
                     <uncertainty type="int" >2</uncertainty>
                    </uncertainty>
                   </item>
                   <item type="UncertainValue" >
                    <value type="float" >0.027</value>
                    <uncertainty type="Uncertainty" >
                     <precision type="int" >3</precision>
                     <uncertainty type="int" >2</uncertainty>
                    </uncertainty>
                   </item>
                   <item type="UncertainValue" >
                    <value type="float" >0.025600000000000001</value>
                    <uncertainty type="Uncertainty" >
                     <precision type="int" >4</precision>
                     <uncertainty type="int" >19</uncertainty>
                    </uncertainty>
                   </item>
                   <item type="UncertainValue" >
                    <value type="float" >0.00020000000000000001</value>
                    <uncertainty type="Uncertainty" >
                     <precision type="int" >4</precision>
                     <uncertainty type="int" >17</uncertainty>
                    </uncertainty>
                   </item>
                   <item type="UncertainValue" >
                    <value type="float" >-0.0054999999999999997</value>
                    <uncertainty type="Uncertainty" >
                     <precision type="int" >4</precision>
                     <uncertainty type="int" >16</uncertainty>
                    </uncertainty>
                   </item>
                   <item type="UncertainValue" >
                    <value type="float" >-0.0030000000000000001</value>
                    <uncertainty type="Uncertainty" >
                     <precision type="int" >4</precision>
                     <uncertainty type="int" >16</uncertainty>
                    </uncertainty>
                   </item>
                  </uvalues>
                  <type type="AtomicDisplacementParameters::Type" >
                   <enumerator type="int" >0</enumerator>
                  </type>
                  <u_equivalent type="float" >0.027974270074239669</u_equivalent>
                 </value>
                </adps>
               </value>
              </site>
              <annotations type="Annotations" >
               <annotations type="Container" >
                <count type="int" >1</count>
                <item type="Handle" >
                 <serial_number type="int" >257</serial_number>
                 <value type="FileOrdering" >
                  <value type="Handle" >
                   <serial_number type="int" >258</serial_number>
                   <value type="FileOrdering" >
                    <file_order type="int" >41</file_order>
                   </value>
                  </value>
                 </value>
                </item>
               </annotations>
              </annotations>
             </value>
            </item>
            <item type="Handle" >
             <serial_number type="int" >259</serial_number>
             <value type="Atom3d" >
              <element type="Element" >
               <code type="char" >2</code>
              </element>
              <formal_charge type="int" >0</formal_charge>
              <radius type="float" >0.23000000000000001</radius>
              <label type="string" >H19</label>
              <site type="Handle" >
               <serial_number type="int" >260</serial_number>
               <value type="Site" >
                <orthogonal type="Point" >
                 <coordinates type="Vector" >
                  <vector type="Container" >
                   <count type="int" >3</count>
                   <item type="float" >4.7862159439560061</item>
                   <item type="float" >6.1109399999999994</item>
                   <item type="float" >0.81863510451961985</item>
                  </vector>
                 </coordinates>
                </orthogonal>
                <fractional type="Point" >
                 <coordinates type="Vector" >
                  <vector type="Container" >
                   <count type="int" >3</count>
                   <item type="float" >0.3332</item>
                   <item type="float" >0.82499999999999996</item>
                   <item type="float" >0.0246</item>
                  </vector>
                 </coordinates>
                </fractional>
                <uncertain_value type="UncertainValue" >
                 <value type="float" >1</value>
                 <uncertainty type="Uncertainty" >
                  <precision type="int" >0</precision>
                  <uncertainty type="int" >0</uncertainty>
                 </uncertainty>
                </uncertain_value>
                <uncertainty type="Handle" >
                 <serial_number type="int" >261</serial_number>
                 <value type="Container" >
                  <count type="int" >3</count>
                  <item type="Uncertainty" >
                   <precision type="int" >4</precision>
                   <uncertainty type="int" >0</uncertainty>
                  </item>
                  <item type="Uncertainty" >
                   <precision type="int" >4</precision>
                   <uncertainty type="int" >0</uncertainty>
                  </item>
                  <item type="Uncertainty" >
                   <precision type="int" >4</precision>
                   <uncertainty type="int" >0</uncertainty>
                  </item>
                 </value>
                </uncertainty>
                <adps type="Handle" >
                 <serial_number type="int" >262</serial_number>
                 <value type="AtomicDisplacementParameters" >
                  <uvalues type="Container" >
                   <count type="int" >6</count>
                   <item type="UncertainValue" >
                    <value type="float" >0.033000000000000015</value>
                    <uncertainty type="Uncertainty" >
                     <precision type="int" >1000000</precision>
                     <uncertainty type="int" >0</uncertainty>
                    </uncertainty>
                   </item>
                   <item type="UncertainValue" >
                    <value type="float" >0.033000000000000008</value>
                    <uncertainty type="Uncertainty" >
                     <precision type="int" >1000000</precision>
                     <uncertainty type="int" >0</uncertainty>
                    </uncertainty>
                   </item>
                   <item type="UncertainValue" >
                    <value type="float" >0.033000000000000008</value>
                    <uncertainty type="Uncertainty" >
                     <precision type="int" >1000000</precision>
                     <uncertainty type="int" >0</uncertainty>
                    </uncertainty>
                   </item>
                   <item type="UncertainValue" >
                    <value type="float" >-2.0736573550485023e-18</value>
                    <uncertainty type="Uncertainty" >
                     <precision type="int" >1000000</precision>
                     <uncertainty type="int" >0</uncertainty>
                    </uncertainty>
                   </item>
                   <item type="UncertainValue" >
                    <value type="float" >0.00085405131440891046</value>
                    <uncertainty type="Uncertainty" >
                     <precision type="int" >1000000</precision>
                     <uncertainty type="int" >0</uncertainty>
                    </uncertainty>
                   </item>
                   <item type="UncertainValue" >
                    <value type="float" >-2.0736573550485027e-18</value>
                    <uncertainty type="Uncertainty" >
                     <precision type="int" >1000000</precision>
                     <uncertainty type="int" >0</uncertainty>
                    </uncertainty>
                   </item>
                  </uvalues>
                  <type type="AtomicDisplacementParameters::Type" >
                   <enumerator type="int" >1</enumerator>
                  </type>
                  <u_equivalent type="float" >0.033000000000000002</u_equivalent>
                 </value>
                </adps>
               </value>
              </site>
              <annotations type="Annotations" >
               <annotations type="Container" >
                <count type="int" >1</count>
                <item type="Handle" >
                 <serial_number type="int" >263</serial_number>
                 <value type="FileOrdering" >
                  <value type="Handle" >
                   <serial_number type="int" >264</serial_number>
                   <value type="FileOrdering" >
                    <file_order type="int" >42</file_order>
                   </value>
                  </value>
                 </value>
                </item>
               </annotations>
              </annotations>
             </value>
            </item>
            <item type="Handle" >
             <serial_number type="int" >265</serial_number>
             <value type="Atom3d" >
              <element type="Element" >
               <code type="char" >1</code>
              </element>
              <formal_charge type="int" >0</formal_charge>
              <radius type="float" >0.68000000000000005</radius>
              <label type="string" >C20</label>
              <site type="Handle" >
               <serial_number type="int" >266</serial_number>
               <value type="Site" >
                <orthogonal type="Point" >
                 <coordinates type="Vector" >
                  <vector type="Container" >
                   <count type="int" >3</count>
                   <item type="float" >3.6984222817220207</item>
                   <item type="float" >4.446542159999999</item>
                   <item type="float" >0.81564009803966997</item>
                  </vector>
                 </coordinates>
                </orthogonal>
                <fractional type="Point" >
                 <coordinates type="Vector" >
                  <vector type="Container" >
                   <count type="int" >3</count>
                   <item type="float" >0.25779999999999997</item>
                   <item type="float" >0.60029999999999994</item>
                   <item type="float" >0.024510000000000001</item>
                  </vector>
                 </coordinates>
                </fractional>
                <uncertain_value type="UncertainValue" >
                 <value type="float" >1</value>
                 <uncertainty type="Uncertainty" >
                  <precision type="int" >0</precision>
                  <uncertainty type="int" >0</uncertainty>
                 </uncertainty>
                </uncertain_value>
                <uncertainty type="Handle" >
                 <serial_number type="int" >267</serial_number>
                 <value type="Container" >
                  <count type="int" >3</count>
                  <item type="Uncertainty" >
                   <precision type="int" >4</precision>
                   <uncertainty type="int" >2</uncertainty>
                  </item>
                  <item type="Uncertainty" >
                   <precision type="int" >4</precision>
                   <uncertainty type="int" >4</uncertainty>
                  </item>
                  <item type="Uncertainty" >
                   <precision type="int" >5</precision>
                   <uncertainty type="int" >9</uncertainty>
                  </item>
                 </value>
                </uncertainty>
                <adps type="Handle" >
                 <serial_number type="int" >268</serial_number>
                 <value type="AtomicDisplacementParameters" >
                  <uvalues type="Container" >
                   <count type="int" >6</count>
                   <item type="UncertainValue" >
                    <value type="float" >0.027</value>
                    <uncertainty type="Uncertainty" >
                     <precision type="int" >3</precision>
                     <uncertainty type="int" >2</uncertainty>
                    </uncertainty>
                   </item>
                   <item type="UncertainValue" >
                    <value type="float" >0.029000000000000001</value>
                    <uncertainty type="Uncertainty" >
                     <precision type="int" >3</precision>
                     <uncertainty type="int" >2</uncertainty>
                    </uncertainty>
                   </item>
                   <item type="UncertainValue" >
                    <value type="float" >0.0218</value>
                    <uncertainty type="Uncertainty" >
                     <precision type="int" >4</precision>
                     <uncertainty type="int" >18</uncertainty>
                    </uncertainty>
                   </item>
                   <item type="UncertainValue" >
                    <value type="float" >0.0051000000000000004</value>
                    <uncertainty type="Uncertainty" >
                     <precision type="int" >4</precision>
                     <uncertainty type="int" >17</uncertainty>
                    </uncertainty>
                   </item>
                   <item type="UncertainValue" >
                    <value type="float" >-0.0070000000000000001</value>
                    <uncertainty type="Uncertainty" >
                     <precision type="int" >4</precision>
                     <uncertainty type="int" >15</uncertainty>
                    </uncertainty>
                   </item>
                   <item type="UncertainValue" >
                    <value type="float" >-0.0014</value>
                    <uncertainty type="Uncertainty" >
                     <precision type="int" >4</precision>
                     <uncertainty type="int" >16</uncertainty>
                    </uncertainty>
                   </item>
                  </uvalues>
                  <type type="AtomicDisplacementParameters::Type" >
                   <enumerator type="int" >0</enumerator>
                  </type>
                  <u_equivalent type="float" >0.026065091803056991</u_equivalent>
                 </value>
                </adps>
               </value>
              </site>
              <annotations type="Annotations" >
               <annotations type="Container" >
                <count type="int" >1</count>
                <item type="Handle" >
                 <serial_number type="int" >269</serial_number>
                 <value type="FileOrdering" >
                  <value type="Handle" >
                   <serial_number type="int" >270</serial_number>
                   <value type="FileOrdering" >
                    <file_order type="int" >43</file_order>
                   </value>
                  </value>
                 </value>
                </item>
               </annotations>
              </annotations>
             </value>
            </item>
            <item type="Handle" >
             <serial_number type="int" >271</serial_number>
             <value type="Atom3d" >
              <element type="Element" >
               <code type="char" >2</code>
              </element>
              <formal_charge type="int" >0</formal_charge>
              <radius type="float" >0.23000000000000001</radius>
              <label type="string" >H20</label>
              <site type="Handle" >
               <serial_number type="int" >272</serial_number>
               <value type="Site" >
                <orthogonal type="Point" >
                 <coordinates type="Vector" >
                  <vector type="Container" >
                   <count type="int" >3</count>
                   <item type="float" >3.0659862130929376</item>
                   <item type="float" >4.7650517599999995</item>
                   <item type="float" >1.4475864653090837</item>
                  </vector>
                 </coordinates>
                </orthogonal>
                <fractional type="Point" >
                 <coordinates type="Vector" >
                  <vector type="Container" >
                   <count type="int" >3</count>
                   <item type="float" >0.21510000000000001</item>
                   <item type="float" >0.64329999999999998</item>
                   <item type="float" >0.043499999999999997</item>
                  </vector>
                 </coordinates>
                </fractional>
                <uncertain_value type="UncertainValue" >
                 <value type="float" >1</value>
                 <uncertainty type="Uncertainty" >
                  <precision type="int" >0</precision>
                  <uncertainty type="int" >0</uncertainty>
                 </uncertainty>
                </uncertain_value>
                <uncertainty type="Handle" >
                 <serial_number type="int" >273</serial_number>
                 <value type="Container" >
                  <count type="int" >3</count>
                  <item type="Uncertainty" >
                   <precision type="int" >4</precision>
                   <uncertainty type="int" >0</uncertainty>
                  </item>
                  <item type="Uncertainty" >
                   <precision type="int" >4</precision>
                   <uncertainty type="int" >0</uncertainty>
                  </item>
                  <item type="Uncertainty" >
                   <precision type="int" >4</precision>
                   <uncertainty type="int" >0</uncertainty>
                  </item>
                 </value>
                </uncertainty>
                <adps type="Handle" >
                 <serial_number type="int" >274</serial_number>
                 <value type="AtomicDisplacementParameters" >
                  <uvalues type="Container" >
                   <count type="int" >6</count>
                   <item type="UncertainValue" >
                    <value type="float" >0.031000000000000007</value>
                    <uncertainty type="Uncertainty" >
                     <precision type="int" >1000000</precision>
                     <uncertainty type="int" >0</uncertainty>
                    </uncertainty>
                   </item>
                   <item type="UncertainValue" >
                    <value type="float" >0.031000000000000014</value>
                    <uncertainty type="Uncertainty" >
                     <precision type="int" >1000000</precision>
                     <uncertainty type="int" >0</uncertainty>
                    </uncertainty>
                   </item>
                   <item type="UncertainValue" >
                    <value type="float" >0.031000000000000007</value>
                    <uncertainty type="Uncertainty" >
                     <precision type="int" >1000000</precision>
                     <uncertainty type="int" >0</uncertainty>
                    </uncertainty>
                   </item>
                   <item type="UncertainValue" >
                    <value type="float" >-1.9479811517122294e-18</value>
                    <uncertainty type="Uncertainty" >
                     <precision type="int" >1000000</precision>
                     <uncertainty type="int" >0</uncertainty>
                    </uncertainty>
                   </item>
                   <item type="UncertainValue" >
                    <value type="float" >0.00080229062868715831</value>
                    <uncertainty type="Uncertainty" >
                     <precision type="int" >1000000</precision>
                     <uncertainty type="int" >0</uncertainty>
                    </uncertainty>
                   </item>
                   <item type="UncertainValue" >
                    <value type="float" >-1.9479811517122298e-18</value>
                    <uncertainty type="Uncertainty" >
                     <precision type="int" >1000000</precision>
                     <uncertainty type="int" >0</uncertainty>
                    </uncertainty>
                   </item>
                  </uvalues>
                  <type type="AtomicDisplacementParameters::Type" >
                   <enumerator type="int" >1</enumerator>
                  </type>
                  <u_equivalent type="float" >0.031</u_equivalent>
                 </value>
                </adps>
               </value>
              </site>
              <annotations type="Annotations" >
               <annotations type="Container" >
                <count type="int" >1</count>
                <item type="Handle" >
                 <serial_number type="int" >275</serial_number>
                 <value type="FileOrdering" >
                  <value type="Handle" >
                   <serial_number type="int" >276</serial_number>
                   <value type="FileOrdering" >
                    <file_order type="int" >44</file_order>
                   </value>
                  </value>
                 </value>
                </item>
               </annotations>
              </annotations>
             </value>
            </item>
            <item type="Handle" >
             <serial_number type="int" >277</serial_number>
             <value type="Atom3d" >
              <element type="Element" >
               <code type="char" >1</code>
              </element>
              <formal_charge type="int" >0</formal_charge>
              <radius type="float" >0.68000000000000005</radius>
              <label type="string" >C21</label>
              <site type="Handle" >
               <serial_number type="int" >278</serial_number>
               <value type="Site" >
                <orthogonal type="Point" >
                 <coordinates type="Vector" >
                  <vector type="Container" >
                   <count type="int" >3</count>
                   <item type="float" >3.553593541838636</item>
                   <item type="float" >3.1162090399999998</item>
                   <item type="float" >0.27953393812865063</item>
                  </vector>
                 </coordinates>
                </orthogonal>
                <fractional type="Point" >
                 <coordinates type="Vector" >
                  <vector type="Container" >
                   <count type="int" >3</count>
                   <item type="float" >0.24679999999999999</item>
                   <item type="float" >0.42070000000000002</item>
                   <item type="float" >0.0083999999999999995</item>
                  </vector>
                 </coordinates>
                </fractional>
                <uncertain_value type="UncertainValue" >
                 <value type="float" >1</value>
                 <uncertainty type="Uncertainty" >
                  <precision type="int" >0</precision>
                  <uncertainty type="int" >0</uncertainty>
                 </uncertainty>
                </uncertain_value>
                <uncertainty type="Handle" >
                 <serial_number type="int" >279</serial_number>
                 <value type="Container" >
                  <count type="int" >3</count>
                  <item type="Uncertainty" >
                   <precision type="int" >4</precision>
                   <uncertainty type="int" >2</uncertainty>
                  </item>
                  <item type="Uncertainty" >
                   <precision type="int" >4</precision>
                   <uncertainty type="int" >5</uncertainty>
                  </item>
                  <item type="Uncertainty" >
                   <precision type="int" >5</precision>
                   <uncertainty type="int" >9</uncertainty>
                  </item>
                 </value>
                </uncertainty>
                <adps type="Handle" >
                 <serial_number type="int" >280</serial_number>
                 <value type="AtomicDisplacementParameters" >
                  <uvalues type="Container" >
                   <count type="int" >6</count>
                   <item type="UncertainValue" >
                    <value type="float" >0.027</value>
                    <uncertainty type="Uncertainty" >
                     <precision type="int" >3</precision>
                     <uncertainty type="int" >2</uncertainty>
                    </uncertainty>
                   </item>
                   <item type="UncertainValue" >
                    <value type="float" >0.027</value>
                    <uncertainty type="Uncertainty" >
                     <precision type="int" >3</precision>
                     <uncertainty type="int" >2</uncertainty>
                    </uncertainty>
                   </item>
                   <item type="UncertainValue" >
                    <value type="float" >0.0212</value>
                    <uncertainty type="Uncertainty" >
                     <precision type="int" >4</precision>
                     <uncertainty type="int" >18</uncertainty>
                    </uncertainty>
                   </item>
                   <item type="UncertainValue" >
                    <value type="float" >0.0067000000000000002</value>
                    <uncertainty type="Uncertainty" >
                     <precision type="int" >4</precision>
                     <uncertainty type="int" >17</uncertainty>
                    </uncertainty>
                   </item>
                   <item type="UncertainValue" >
                    <value type="float" >-0.0104</value>
                    <uncertainty type="Uncertainty" >
                     <precision type="int" >4</precision>
                     <uncertainty type="int" >15</uncertainty>
                    </uncertainty>
                   </item>
                   <item type="UncertainValue" >
                    <value type="float" >0.00080000000000000004</value>
                    <uncertainty type="Uncertainty" >
                     <precision type="int" >4</precision>
                     <uncertainty type="int" >15</uncertainty>
                    </uncertainty>
                   </item>
                  </uvalues>
                  <type type="AtomicDisplacementParameters::Type" >
                   <enumerator type="int" >0</enumerator>
                  </type>
                  <u_equivalent type="float" >0.025256992516416846</u_equivalent>
                 </value>
                </adps>
               </value>
              </site>
              <annotations type="Annotations" >
               <annotations type="Container" >
                <count type="int" >1</count>
                <item type="Handle" >
                 <serial_number type="int" >281</serial_number>
                 <value type="FileOrdering" >
                  <value type="Handle" >
                   <serial_number type="int" >282</serial_number>
                   <value type="FileOrdering" >
                    <file_order type="int" >45</file_order>
                   </value>
                  </value>
                 </value>
                </item>
               </annotations>
              </annotations>
             </value>
            </item>
            <item type="Handle" >
             <serial_number type="int" >283</serial_number>
             <value type="Atom3d" >
              <element type="Element" >
               <code type="char" >1</code>
              </element>
              <formal_charge type="int" >0</formal_charge>
              <radius type="float" >0.68000000000000005</radius>
              <label type="string" >C22</label>
              <site type="Handle" >
               <serial_number type="int" >284</serial_number>
               <value type="Site" >
                <orthogonal type="Point" >
                 <coordinates type="Vector" >
                  <vector type="Container" >
                   <count type="int" >3</count>
                   <item type="float" >4.4936749760180792</item>
                   <item type="float" >2.6925171999999997</item>
                   <item type="float" >-0.69950040231717114</item>
                  </vector>
                 </coordinates>
                </orthogonal>
                <fractional type="Point" >
                 <coordinates type="Vector" >
                  <vector type="Container" >
                   <count type="int" >3</count>
                   <item type="float" >0.31019999999999998</item>
                   <item type="float" >0.36349999999999999</item>
                   <item type="float" >-0.02102</item>
                  </vector>
                 </coordinates>
                </fractional>
                <uncertain_value type="UncertainValue" >
                 <value type="float" >1</value>
                 <uncertainty type="Uncertainty" >
                  <precision type="int" >0</precision>
                  <uncertainty type="int" >0</uncertainty>
                 </uncertainty>
                </uncertain_value>
                <uncertainty type="Handle" >
                 <serial_number type="int" >285</serial_number>
                 <value type="Container" >
                  <count type="int" >3</count>
                  <item type="Uncertainty" >
                   <precision type="int" >4</precision>
                   <uncertainty type="int" >2</uncertainty>
                  </item>
                  <item type="Uncertainty" >
                   <precision type="int" >4</precision>
                   <uncertainty type="int" >5</uncertainty>
                  </item>
                  <item type="Uncertainty" >
                   <precision type="int" >5</precision>
                   <uncertainty type="int" >9</uncertainty>
                  </item>
                 </value>
                </uncertainty>
                <adps type="Handle" >
                 <serial_number type="int" >286</serial_number>
                 <value type="AtomicDisplacementParameters" >
                  <uvalues type="Container" >
                   <count type="int" >6</count>
                   <item type="UncertainValue" >
                    <value type="float" >0.025000000000000001</value>
                    <uncertainty type="Uncertainty" >
                     <precision type="int" >3</precision>
                     <uncertainty type="int" >2</uncertainty>
                    </uncertainty>
                   </item>
                   <item type="UncertainValue" >
                    <value type="float" >0.031</value>
                    <uncertainty type="Uncertainty" >
                     <precision type="int" >3</precision>
                     <uncertainty type="int" >2</uncertainty>
                    </uncertainty>
                   </item>
                   <item type="UncertainValue" >
                    <value type="float" >0.018200000000000001</value>
                    <uncertainty type="Uncertainty" >
                     <precision type="int" >4</precision>
                     <uncertainty type="int" >17</uncertainty>
                    </uncertainty>
                   </item>
                   <item type="UncertainValue" >
                    <value type="float" >0.0071000000000000004</value>
                    <uncertainty type="Uncertainty" >
                     <precision type="int" >4</precision>
                     <uncertainty type="int" >16</uncertainty>
                    </uncertainty>
                   </item>
                   <item type="UncertainValue" >
                    <value type="float" >-0.012699999999999999</value>
                    <uncertainty type="Uncertainty" >
                     <precision type="int" >4</precision>
                     <uncertainty type="int" >15</uncertainty>
                    </uncertainty>
                   </item>
                   <item type="UncertainValue" >
                    <value type="float" >-0.0014</value>
                    <uncertainty type="Uncertainty" >
                     <precision type="int" >4</precision>
                     <uncertainty type="int" >15</uncertainty>
                    </uncertainty>
                   </item>
                  </uvalues>
                  <type type="AtomicDisplacementParameters::Type" >
                   <enumerator type="int" >0</enumerator>
                  </type>
                  <u_equivalent type="float" >0.024962251904327468</u_equivalent>
                 </value>
                </adps>
               </value>
              </site>
              <annotations type="Annotations" >
               <annotations type="Container" >
                <count type="int" >1</count>
                <item type="Handle" >
                 <serial_number type="int" >287</serial_number>
                 <value type="FileOrdering" >
                  <value type="Handle" >
                   <serial_number type="int" >288</serial_number>
                   <value type="FileOrdering" >
                    <file_order type="int" >46</file_order>
                   </value>
                  </value>
                 </value>
                </item>
               </annotations>
              </annotations>
             </value>
            </item>
            <item type="Handle" >
             <serial_number type="int" >289</serial_number>
             <value type="Atom3d" >
              <element type="Element" >
               <code type="char" >1</code>
              </element>
              <formal_charge type="int" >0</formal_charge>
              <radius type="float" >0.68000000000000005</radius>
              <label type="string" >C23</label>
              <site type="Handle" >
               <serial_number type="int" >290</serial_number>
               <value type="Site" >
                <orthogonal type="Point" >
                 <coordinates type="Vector" >
                  <vector type="Container" >
                   <count type="int" >3</count>
                   <item type="float" >5.561680513200713</item>
                   <item type="float" >3.54582664</item>
                   <item type="float" >-1.1024951631193092</item>
                  </vector>
                 </coordinates>
                </orthogonal>
                <fractional type="Point" >
                 <coordinates type="Vector" >
                  <vector type="Container" >
                   <count type="int" >3</count>
                   <item type="float" >0.38350000000000001</item>
                   <item type="float" >0.47870000000000001</item>
                   <item type="float" >-0.03313</item>
                  </vector>
                 </coordinates>
                </fractional>
                <uncertain_value type="UncertainValue" >
                 <value type="float" >1</value>
                 <uncertainty type="Uncertainty" >
                  <precision type="int" >0</precision>
                  <uncertainty type="int" >0</uncertainty>
                 </uncertainty>
                </uncertain_value>
                <uncertainty type="Handle" >
                 <serial_number type="int" >291</serial_number>
                 <value type="Container" >
                  <count type="int" >3</count>
                  <item type="Uncertainty" >
                   <precision type="int" >4</precision>
                   <uncertainty type="int" >2</uncertainty>
                  </item>
                  <item type="Uncertainty" >
                   <precision type="int" >4</precision>
                   <uncertainty type="int" >4</uncertainty>
                  </item>
                  <item type="Uncertainty" >
                   <precision type="int" >5</precision>
                   <uncertainty type="int" >9</uncertainty>
                  </item>
                 </value>
                </uncertainty>
                <adps type="Handle" >
                 <serial_number type="int" >292</serial_number>
                 <value type="AtomicDisplacementParameters" >
                  <uvalues type="Container" >
                   <count type="int" >6</count>
                   <item type="UncertainValue" >
                    <value type="float" >0.024</value>
                    <uncertainty type="Uncertainty" >
                     <precision type="int" >3</precision>
                     <uncertainty type="int" >2</uncertainty>
                    </uncertainty>
                   </item>
                   <item type="UncertainValue" >
                    <value type="float" >0.028000000000000001</value>
                    <uncertainty type="Uncertainty" >
                     <precision type="int" >3</precision>
                     <uncertainty type="int" >2</uncertainty>
                    </uncertainty>
                   </item>
                   <item type="UncertainValue" >
                    <value type="float" >0.019800000000000002</value>
                    <uncertainty type="Uncertainty" >
                     <precision type="int" >4</precision>
                     <uncertainty type="int" >18</uncertainty>
                    </uncertainty>
                   </item>
                   <item type="UncertainValue" >
                    <value type="float" >0.0037000000000000002</value>
                    <uncertainty type="Uncertainty" >
                     <precision type="int" >4</precision>
                     <uncertainty type="int" >16</uncertainty>
                    </uncertainty>
                   </item>
                   <item type="UncertainValue" >
                    <value type="float" >-0.0088000000000000005</value>
                    <uncertainty type="Uncertainty" >
                     <precision type="int" >4</precision>
                     <uncertainty type="int" >15</uncertainty>
                    </uncertainty>
                   </item>
                   <item type="UncertainValue" >
                    <value type="float" >0.0016999999999999999</value>
                    <uncertainty type="Uncertainty" >
                     <precision type="int" >4</precision>
                     <uncertainty type="int" >15</uncertainty>
                    </uncertainty>
                   </item>
                  </uvalues>
                  <type type="AtomicDisplacementParameters::Type" >
                   <enumerator type="int" >0</enumerator>
                  </type>
                  <u_equivalent type="float" >0.024095051961324433</u_equivalent>
                 </value>
                </adps>
               </value>
              </site>
              <annotations type="Annotations" >
               <annotations type="Container" >
                <count type="int" >1</count>
                <item type="Handle" >
                 <serial_number type="int" >293</serial_number>
                 <value type="FileOrdering" >
                  <value type="Handle" >
                   <serial_number type="int" >294</serial_number>
                   <value type="FileOrdering" >
                    <file_order type="int" >47</file_order>
                   </value>
                  </value>
                 </value>
                </item>
               </annotations>
              </annotations>
             </value>
            </item>
            <item type="Handle" >
             <serial_number type="int" >295</serial_number>
             <value type="Atom3d" >
              <element type="Element" >
               <code type="char" >64</code>
              </element>
              <formal_charge type="int" >0</formal_charge>
              <radius type="float" >0.68000000000000005</radius>
              <label type="string" >O3</label>
              <site type="Handle" >
               <serial_number type="int" >296</serial_number>
               <value type="Site" >
                <orthogonal type="Point" >
                 <coordinates type="Vector" >
                  <vector type="Container" >
                   <count type="int" >3</count>
                   <item type="float" >5.8441697537047466</item>
                   <item type="float" >4.8124578400000004</item>
                   <item type="float" >5.3124759384354521</item>
                  </vector>
                 </coordinates>
                </orthogonal>
                <fractional type="Point" >
                 <coordinates type="Vector" >
                  <vector type="Container" >
                   <count type="int" >3</count>
                   <item type="float" >0.41459000000000001</item>
                   <item type="float" >0.64970000000000006</item>
                   <item type="float" >0.15964</item>
                  </vector>
                 </coordinates>
                </fractional>
                <uncertain_value type="UncertainValue" >
                 <value type="float" >1</value>
                 <uncertainty type="Uncertainty" >
                  <precision type="int" >0</precision>
                  <uncertainty type="int" >0</uncertainty>
                 </uncertainty>
                </uncertain_value>
                <uncertainty type="Handle" >
                 <serial_number type="int" >297</serial_number>
                 <value type="Container" >
                  <count type="int" >3</count>
                  <item type="Uncertainty" >
                   <precision type="int" >5</precision>
                   <uncertainty type="int" >16</uncertainty>
                  </item>
                  <item type="Uncertainty" >
                   <precision type="int" >4</precision>
                   <uncertainty type="int" >3</uncertainty>
                  </item>
                  <item type="Uncertainty" >
                   <precision type="int" >5</precision>
                   <uncertainty type="int" >6</uncertainty>
                  </item>
                 </value>
                </uncertainty>
                <adps type="Handle" >
                 <serial_number type="int" >298</serial_number>
                 <value type="AtomicDisplacementParameters" >
                  <uvalues type="Container" >
                   <count type="int" >6</count>
                   <item type="UncertainValue" >
                    <value type="float" >0.042999999999999997</value>
                    <uncertainty type="Uncertainty" >
                     <precision type="int" >4</precision>
                     <uncertainty type="int" >16</uncertainty>
                    </uncertainty>
                   </item>
                   <item type="UncertainValue" >
                    <value type="float" >0.026499999999999999</value>
                    <uncertainty type="Uncertainty" >
                     <precision type="int" >4</precision>
                     <uncertainty type="int" >14</uncertainty>
                    </uncertainty>
                   </item>
                   <item type="UncertainValue" >
                    <value type="float" >0.0292</value>
                    <uncertainty type="Uncertainty" >
                     <precision type="int" >4</precision>
                     <uncertainty type="int" >13</uncertainty>
                    </uncertainty>
                   </item>
                   <item type="UncertainValue" >
                    <value type="float" >0.0060000000000000001</value>
                    <uncertainty type="Uncertainty" >
                     <precision type="int" >4</precision>
                     <uncertainty type="int" >12</uncertainty>
                    </uncertainty>
                   </item>
                   <item type="UncertainValue" >
                    <value type="float" >-0.0044999999999999997</value>
                    <uncertainty type="Uncertainty" >
                     <precision type="int" >4</precision>
                     <uncertainty type="int" >11</uncertainty>
                    </uncertainty>
                   </item>
                   <item type="UncertainValue" >
                    <value type="float" >-0.01</value>
                    <uncertainty type="Uncertainty" >
                     <precision type="int" >4</precision>
                     <uncertainty type="int" >11</uncertainty>
                    </uncertainty>
                   </item>
                  </uvalues>
                  <type type="AtomicDisplacementParameters::Type" >
                   <enumerator type="int" >0</enumerator>
                  </type>
                  <u_equivalent type="float" >0.032993823535177741</u_equivalent>
                 </value>
                </adps>
               </value>
              </site>
              <annotations type="Annotations" >
               <annotations type="Container" >
                <count type="int" >1</count>
                <item type="Handle" >
                 <serial_number type="int" >299</serial_number>
                 <value type="FileOrdering" >
                  <value type="Handle" >
                   <serial_number type="int" >300</serial_number>
                   <value type="FileOrdering" >
                    <file_order type="int" >48</file_order>
                   </value>
                  </value>
                 </value>
                </item>
               </annotations>
              </annotations>
             </value>
            </item>
            <item type="Handle" >
             <serial_number type="int" >301</serial_number>
             <value type="Atom3d" >
              <element type="Element" >
               <code type="char" >64</code>
              </element>
              <formal_charge type="int" >0</formal_charge>
              <radius type="float" >0.68000000000000005</radius>
              <label type="string" >O4</label>
              <site type="Handle" >
               <serial_number type="int" >302</serial_number>
               <value type="Site" >
                <orthogonal type="Point" >
                 <coordinates type="Vector" >
                  <vector type="Container" >
                   <count type="int" >3</count>
                   <item type="float" >5.4193536489994276</item>
                   <item type="float" >8.1819931199999996</item>
                   <item type="float" >8.4522410649161888</item>
                  </vector>
                 </coordinates>
                </orthogonal>
                <fractional type="Point" >
                 <coordinates type="Vector" >
                  <vector type="Container" >
                   <count type="int" >3</count>
                   <item type="float" >0.39078000000000002</item>
                   <item type="float" >1.1046</item>
                   <item type="float" >0.25398999999999999</item>
                  </vector>
                 </coordinates>
                </fractional>
                <uncertain_value type="UncertainValue" >
                 <value type="float" >1</value>
                 <uncertainty type="Uncertainty" >
                  <precision type="int" >0</precision>
                  <uncertainty type="int" >0</uncertainty>
                 </uncertainty>
                </uncertain_value>
                <uncertainty type="Handle" >
                 <serial_number type="int" >303</serial_number>
                 <value type="Container" >
                  <count type="int" >3</count>
                  <item type="Uncertainty" >
                   <precision type="int" >5</precision>
                   <uncertainty type="int" >15</uncertainty>
                  </item>
                  <item type="Uncertainty" >
                   <precision type="int" >4</precision>
                   <uncertainty type="int" >3</uncertainty>
                  </item>
                  <item type="Uncertainty" >
                   <precision type="int" >5</precision>
                   <uncertainty type="int" >6</uncertainty>
                  </item>
                 </value>
                </uncertainty>
                <adps type="Handle" >
                 <serial_number type="int" >304</serial_number>
                 <value type="AtomicDisplacementParameters" >
                  <uvalues type="Container" >
                   <count type="int" >6</count>
                   <item type="UncertainValue" >
                    <value type="float" >0.035499999999999997</value>
                    <uncertainty type="Uncertainty" >
                     <precision type="int" >4</precision>
                     <uncertainty type="int" >15</uncertainty>
                    </uncertainty>
                   </item>
                   <item type="UncertainValue" >
                    <value type="float" >0.031800000000000002</value>
                    <uncertainty type="Uncertainty" >
                     <precision type="int" >4</precision>
                     <uncertainty type="int" >15</uncertainty>
                    </uncertainty>
                   </item>
                   <item type="UncertainValue" >
                    <value type="float" >0.023300000000000001</value>
                    <uncertainty type="Uncertainty" >
                     <precision type="int" >4</precision>
                     <uncertainty type="int" >12</uncertainty>
                    </uncertainty>
                   </item>
                   <item type="UncertainValue" >
                    <value type="float" >0.00080000000000000004</value>
                    <uncertainty type="Uncertainty" >
                     <precision type="int" >4</precision>
                     <uncertainty type="int" >12</uncertainty>
                    </uncertainty>
                   </item>
                   <item type="UncertainValue" >
                    <value type="float" >-0.0060000000000000001</value>
                    <uncertainty type="Uncertainty" >
                     <precision type="int" >4</precision>
                     <uncertainty type="int" >11</uncertainty>
                    </uncertainty>
                   </item>
                   <item type="UncertainValue" >
                    <value type="float" >-0.0104</value>
                    <uncertainty type="Uncertainty" >
                     <precision type="int" >4</precision>
                     <uncertainty type="int" >11</uncertainty>
                    </uncertainty>
                   </item>
                  </uvalues>
                  <type type="AtomicDisplacementParameters::Type" >
                   <enumerator type="int" >0</enumerator>
                  </type>
                  <u_equivalent type="float" >0.030316727480666633</u_equivalent>
                 </value>
                </adps>
               </value>
              </site>
              <annotations type="Annotations" >
               <annotations type="Container" >
                <count type="int" >1</count>
                <item type="Handle" >
                 <serial_number type="int" >305</serial_number>
                 <value type="FileOrdering" >
                  <value type="Handle" >
                   <serial_number type="int" >306</serial_number>
                   <value type="FileOrdering" >
                    <file_order type="int" >49</file_order>
                   </value>
                  </value>
                 </value>
                </item>
               </annotations>
              </annotations>
             </value>
            </item>
            <item type="Handle" >
             <serial_number type="int" >307</serial_number>
             <value type="Atom3d" >
              <element type="Element" >
               <code type="char" >56</code>
              </element>
              <formal_charge type="int" >0</formal_charge>
              <radius type="float" >0.68000000000000005</radius>
              <label type="string" >N3</label>
              <site type="Handle" >
               <serial_number type="int" >308</serial_number>
               <value type="Site" >
                <orthogonal type="Point" >
                 <coordinates type="Vector" >
                  <vector type="Container" >
                   <count type="int" >3</count>
                   <item type="float" >5.4668037056438772</item>
                   <item type="float" >5.8865018399999993</item>
                   <item type="float" >5.9004955439989342</item>
                  </vector>
                 </coordinates>
                </orthogonal>
                <fractional type="Point" >
                 <coordinates type="Vector" >
                  <vector type="Container" >
                   <count type="int" >3</count>
                   <item type="float" >0.38949</item>
                   <item type="float" >0.79469999999999996</item>
                   <item type="float" >0.17731</item>
                  </vector>
                 </coordinates>
                </fractional>
                <uncertain_value type="UncertainValue" >
                 <value type="float" >1</value>
                 <uncertainty type="Uncertainty" >
                  <precision type="int" >0</precision>
                  <uncertainty type="int" >0</uncertainty>
                 </uncertainty>
                </uncertain_value>
                <uncertainty type="Handle" >
                 <serial_number type="int" >309</serial_number>
                 <value type="Container" >
                  <count type="int" >3</count>
                  <item type="Uncertainty" >
                   <precision type="int" >5</precision>
                   <uncertainty type="int" >18</uncertainty>
                  </item>
                  <item type="Uncertainty" >
                   <precision type="int" >4</precision>
                   <uncertainty type="int" >3</uncertainty>
                  </item>
                  <item type="Uncertainty" >
                   <precision type="int" >5</precision>
                   <uncertainty type="int" >7</uncertainty>
                  </item>
                 </value>
                </uncertainty>
                <adps type="Handle" >
                 <serial_number type="int" >310</serial_number>
                 <value type="AtomicDisplacementParameters" >
                  <uvalues type="Container" >
                   <count type="int" >6</count>
                   <item type="UncertainValue" >
                    <value type="float" >0.027300000000000001</value>
                    <uncertainty type="Uncertainty" >
                     <precision type="int" >4</precision>
                     <uncertainty type="int" >16</uncertainty>
                    </uncertainty>
                   </item>
                   <item type="UncertainValue" >
                    <value type="float" >0.0201</value>
                    <uncertainty type="Uncertainty" >
                     <precision type="int" >4</precision>
                     <uncertainty type="int" >16</uncertainty>
                    </uncertainty>
                   </item>
                   <item type="UncertainValue" >
                    <value type="float" >0.024</value>
                    <uncertainty type="Uncertainty" >
                     <precision type="int" >4</precision>
                     <uncertainty type="int" >15</uncertainty>
                    </uncertainty>
                   </item>
                   <item type="UncertainValue" >
                    <value type="float" >0.0016000000000000001</value>
                    <uncertainty type="Uncertainty" >
                     <precision type="int" >4</precision>
                     <uncertainty type="int" >13</uncertainty>
                    </uncertainty>
                   </item>
                   <item type="UncertainValue" >
                    <value type="float" >-0.0053</value>
                    <uncertainty type="Uncertainty" >
                     <precision type="int" >4</precision>
                     <uncertainty type="int" >13</uncertainty>
                    </uncertainty>
                   </item>
                   <item type="UncertainValue" >
                    <value type="float" >-0.0023999999999999998</value>
                    <uncertainty type="Uncertainty" >
                     <precision type="int" >4</precision>
                     <uncertainty type="int" >13</uncertainty>
                    </uncertainty>
                   </item>
                  </uvalues>
                  <type type="AtomicDisplacementParameters::Type" >
                   <enumerator type="int" >0</enumerator>
                  </type>
                  <u_equivalent type="float" >0.023902966289827517</u_equivalent>
                 </value>
                </adps>
               </value>
              </site>
              <annotations type="Annotations" >
               <annotations type="Container" >
                <count type="int" >1</count>
                <item type="Handle" >
                 <serial_number type="int" >311</serial_number>
                 <value type="FileOrdering" >
                  <value type="Handle" >
                   <serial_number type="int" >312</serial_number>
                   <value type="FileOrdering" >
                    <file_order type="int" >50</file_order>
                   </value>
                  </value>
                 </value>
                </item>
               </annotations>
              </annotations>
             </value>
            </item>
            <item type="Handle" >
             <serial_number type="int" >313</serial_number>
             <value type="Atom3d" >
              <element type="Element" >
               <code type="char" >56</code>
              </element>
              <formal_charge type="int" >0</formal_charge>
              <radius type="float" >0.68000000000000005</radius>
              <label type="string" >N4</label>
              <site type="Handle" >
               <serial_number type="int" >314</serial_number>
               <value type="Site" >
                <orthogonal type="Point" >
                 <coordinates type="Vector" >
                  <vector type="Container" >
                   <count type="int" >3</count>
                   <item type="float" >5.3218405933700668</item>
                   <item type="float" >7.5071972000000011</item>
                   <item type="float" >7.3647209341966287</item>
                  </vector>
                 </coordinates>
                </orthogonal>
                <fractional type="Point" >
                 <coordinates type="Vector" >
                  <vector type="Container" >
                   <count type="int" >3</count>
                   <item type="float" >0.38207000000000002</item>
                   <item type="float" >1.0135000000000001</item>
                   <item type="float" >0.22131000000000001</item>
                  </vector>
                 </coordinates>
                </fractional>
                <uncertain_value type="UncertainValue" >
                 <value type="float" >1</value>
                 <uncertainty type="Uncertainty" >
                  <precision type="int" >0</precision>
                  <uncertainty type="int" >0</uncertainty>
                 </uncertainty>
                </uncertain_value>
                <uncertainty type="Handle" >
                 <serial_number type="int" >315</serial_number>
                 <value type="Container" >
                  <count type="int" >3</count>
                  <item type="Uncertainty" >
                   <precision type="int" >5</precision>
                   <uncertainty type="int" >19</uncertainty>
                  </item>
                  <item type="Uncertainty" >
                   <precision type="int" >4</precision>
                   <uncertainty type="int" >4</uncertainty>
                  </item>
                  <item type="Uncertainty" >
                   <precision type="int" >5</precision>
                   <uncertainty type="int" >8</uncertainty>
                  </item>
                 </value>
                </uncertainty>
                <adps type="Handle" >
                 <serial_number type="int" >316</serial_number>
                 <value type="AtomicDisplacementParameters" >
                  <uvalues type="Container" >
                   <count type="int" >6</count>
                   <item type="UncertainValue" >
                    <value type="float" >0.029700000000000001</value>
                    <uncertainty type="Uncertainty" >
                     <precision type="int" >4</precision>
                     <uncertainty type="int" >17</uncertainty>
                    </uncertainty>
                   </item>
                   <item type="UncertainValue" >
                    <value type="float" >0.023400000000000001</value>
                    <uncertainty type="Uncertainty" >
                     <precision type="int" >4</precision>
                     <uncertainty type="int" >16</uncertainty>
                    </uncertainty>
                   </item>
                   <item type="UncertainValue" >
                    <value type="float" >0.02</value>
                    <uncertainty type="Uncertainty" >
                     <precision type="int" >4</precision>
                     <uncertainty type="int" >15</uncertainty>
                    </uncertainty>
                   </item>
                   <item type="UncertainValue" >
                    <value type="float" >0.00020000000000000001</value>
                    <uncertainty type="Uncertainty" >
                     <precision type="int" >4</precision>
                     <uncertainty type="int" >13</uncertainty>
                    </uncertainty>
                   </item>
                   <item type="UncertainValue" >
                    <value type="float" >-0.0050000000000000001</value>
                    <uncertainty type="Uncertainty" >
                     <precision type="int" >4</precision>
                     <uncertainty type="int" >12</uncertainty>
                    </uncertainty>
                   </item>
                   <item type="UncertainValue" >
                    <value type="float" >-0.0025000000000000001</value>
                    <uncertainty type="Uncertainty" >
                     <precision type="int" >4</precision>
                     <uncertainty type="int" >12</uncertainty>
                    </uncertainty>
                   </item>
                  </uvalues>
                  <type type="AtomicDisplacementParameters::Type" >
                   <enumerator type="int" >0</enumerator>
                  </type>
                  <u_equivalent type="float" >0.024464095956804915</u_equivalent>
                 </value>
                </adps>
               </value>
              </site>
              <annotations type="Annotations" >
               <annotations type="Container" >
                <count type="int" >1</count>
                <item type="Handle" >
                 <serial_number type="int" >317</serial_number>
                 <value type="FileOrdering" >
                  <value type="Handle" >
                   <serial_number type="int" >318</serial_number>
                   <value type="FileOrdering" >
                    <file_order type="int" >51</file_order>
                   </value>
                  </value>
                 </value>
                </item>
               </annotations>
              </annotations>
             </value>
            </item>
            <item type="Handle" >
             <serial_number type="int" >319</serial_number>
             <value type="Atom3d" >
              <element type="Element" >
               <code type="char" >1</code>
              </element>
              <formal_charge type="int" >0</formal_charge>
              <radius type="float" >0.68000000000000005</radius>
              <label type="string" >C24</label>
              <site type="Handle" >
               <serial_number type="int" >320</serial_number>
               <value type="Site" >
                <orthogonal type="Point" >
                 <coordinates type="Vector" >
                  <vector type="Container" >
                   <count type="int" >3</count>
                   <item type="float" >5.8899668832566139</item>
                   <item type="float" >6.3116751200000003</item>
                   <item type="float" >7.1158026178630207</item>
                  </vector>
                 </coordinates>
                </orthogonal>
                <fractional type="Point" >
                 <coordinates type="Vector" >
                  <vector type="Container" >
                   <count type="int" >3</count>
                   <item type="float" >0.42099999999999999</item>
                   <item type="float" >0.85209999999999997</item>
                   <item type="float" >0.21382999999999999</item>
                  </vector>
                 </coordinates>
                </fractional>
                <uncertain_value type="UncertainValue" >
                 <value type="float" >1</value>
                 <uncertainty type="Uncertainty" >
                  <precision type="int" >0</precision>
                  <uncertainty type="int" >0</uncertainty>
                 </uncertainty>
                </uncertain_value>
                <uncertainty type="Handle" >
                 <serial_number type="int" >321</serial_number>
                 <value type="Container" >
                  <count type="int" >3</count>
                  <item type="Uncertainty" >
                   <precision type="int" >4</precision>
                   <uncertainty type="int" >2</uncertainty>
                  </item>
                  <item type="Uncertainty" >
                   <precision type="int" >4</precision>
                   <uncertainty type="int" >4</uncertainty>
                  </item>
                  <item type="Uncertainty" >
                   <precision type="int" >5</precision>
                   <uncertainty type="int" >9</uncertainty>
                  </item>
                 </value>
                </uncertainty>
                <adps type="Handle" >
                 <serial_number type="int" >322</serial_number>
                 <value type="AtomicDisplacementParameters" >
                  <uvalues type="Container" >
                   <count type="int" >6</count>
                   <item type="UncertainValue" >
                    <value type="float" >0.021399999999999999</value>
                    <uncertainty type="Uncertainty" >
                     <precision type="int" >4</precision>
                     <uncertainty type="int" >19</uncertainty>
                    </uncertainty>
                   </item>
                   <item type="UncertainValue" >
                    <value type="float" >0.025000000000000001</value>
                    <uncertainty type="Uncertainty" >
                     <precision type="int" >3</precision>
                     <uncertainty type="int" >2</uncertainty>
                    </uncertainty>
                   </item>
                   <item type="UncertainValue" >
                    <value type="float" >0.0223</value>
                    <uncertainty type="Uncertainty" >
                     <precision type="int" >4</precision>
                     <uncertainty type="int" >18</uncertainty>
                    </uncertainty>
                   </item>
                   <item type="UncertainValue" >
                    <value type="float" >-0.0018</value>
                    <uncertainty type="Uncertainty" >
                     <precision type="int" >4</precision>
                     <uncertainty type="int" >16</uncertainty>
                    </uncertainty>
                   </item>
                   <item type="UncertainValue" >
                    <value type="float" >-0.0030000000000000001</value>
                    <uncertainty type="Uncertainty" >
                     <precision type="int" >4</precision>
                     <uncertainty type="int" >15</uncertainty>
                    </uncertainty>
                   </item>
                   <item type="UncertainValue" >
                    <value type="float" >-0.0025999999999999999</value>
                    <uncertainty type="Uncertainty" >
                     <precision type="int" >4</precision>
                     <uncertainty type="int" >15</uncertainty>
                    </uncertainty>
                   </item>
                  </uvalues>
                  <type type="AtomicDisplacementParameters::Type" >
                   <enumerator type="int" >0</enumerator>
                  </type>
                  <u_equivalent type="float" >0.022961558556094597</u_equivalent>
                 </value>
                </adps>
               </value>
              </site>
              <annotations type="Annotations" >
               <annotations type="Container" >
                <count type="int" >1</count>
                <item type="Handle" >
                 <serial_number type="int" >323</serial_number>
                 <value type="FileOrdering" >
                  <value type="Handle" >
                   <serial_number type="int" >324</serial_number>
                   <value type="FileOrdering" >
                    <file_order type="int" >52</file_order>
                   </value>
                  </value>
                 </value>
                </item>
               </annotations>
              </annotations>
             </value>
            </item>
            <item type="Handle" >
             <serial_number type="int" >325</serial_number>
             <value type="Atom3d" >
              <element type="Element" >
               <code type="char" >1</code>
              </element>
              <formal_charge type="int" >0</formal_charge>
              <radius type="float" >0.68000000000000005</radius>
              <label type="string" >C25</label>
              <site type="Handle" >
               <serial_number type="int" >326</serial_number>
               <value type="Site" >
                <orthogonal type="Point" >
                 <coordinates type="Vector" >
                  <vector type="Container" >
                   <count type="int" >3</count>
                   <item type="float" >4.346295373242401</item>
                   <item type="float" >6.7464777600000003</item>
                   <item type="float" >5.3833577584609307</item>
                  </vector>
                 </coordinates>
                </orthogonal>
                <fractional type="Point" >
                 <coordinates type="Vector" >
                  <vector type="Container" >
                   <count type="int" >3</count>
                   <item type="float" >0.31090000000000001</item>
                   <item type="float" >0.91080000000000005</item>
                   <item type="float" >0.16177</item>
                  </vector>
                 </coordinates>
                </fractional>
                <uncertain_value type="UncertainValue" >
                 <value type="float" >1</value>
                 <uncertainty type="Uncertainty" >
                  <precision type="int" >0</precision>
                  <uncertainty type="int" >0</uncertainty>
                 </uncertainty>
                </uncertain_value>
                <uncertainty type="Handle" >
                 <serial_number type="int" >327</serial_number>
                 <value type="Container" >
                  <count type="int" >3</count>
                  <item type="Uncertainty" >
                   <precision type="int" >4</precision>
                   <uncertainty type="int" >2</uncertainty>
                  </item>
                  <item type="Uncertainty" >
                   <precision type="int" >4</precision>
                   <uncertainty type="int" >4</uncertainty>
                  </item>
                  <item type="Uncertainty" >
                   <precision type="int" >5</precision>
                   <uncertainty type="int" >9</uncertainty>
                  </item>
                 </value>
                </uncertainty>
                <adps type="Handle" >
                 <serial_number type="int" >328</serial_number>
                 <value type="AtomicDisplacementParameters" >
                  <uvalues type="Container" >
                   <count type="int" >6</count>
                   <item type="UncertainValue" >
                    <value type="float" >0.0229</value>
                    <uncertainty type="Uncertainty" >
                     <precision type="int" >4</precision>
                     <uncertainty type="int" >19</uncertainty>
                    </uncertainty>
                   </item>
                   <item type="UncertainValue" >
                    <value type="float" >0.028000000000000001</value>
                    <uncertainty type="Uncertainty" >
                     <precision type="int" >3</precision>
                     <uncertainty type="int" >2</uncertainty>
                    </uncertainty>
                   </item>
                   <item type="UncertainValue" >
                    <value type="float" >0.0189</value>
                    <uncertainty type="Uncertainty" >
                     <precision type="int" >4</precision>
                     <uncertainty type="int" >17</uncertainty>
                    </uncertainty>
                   </item>
                   <item type="UncertainValue" >
                    <value type="float" >0.00080000000000000004</value>
                    <uncertainty type="Uncertainty" >
                     <precision type="int" >4</precision>
                     <uncertainty type="int" >16</uncertainty>
                    </uncertainty>
                   </item>
                   <item type="UncertainValue" >
                    <value type="float" >-0.0088000000000000005</value>
                    <uncertainty type="Uncertainty" >
                     <precision type="int" >4</precision>
                     <uncertainty type="int" >14</uncertainty>
                    </uncertainty>
                   </item>
                   <item type="UncertainValue" >
                    <value type="float" >0.00089999999999999998</value>
                    <uncertainty type="Uncertainty" >
                     <precision type="int" >4</precision>
                     <uncertainty type="int" >15</uncertainty>
                    </uncertainty>
                   </item>
                  </uvalues>
                  <type type="AtomicDisplacementParameters::Type" >
                   <enumerator type="int" >0</enumerator>
                  </type>
                  <u_equivalent type="float" >0.023427938467278569</u_equivalent>
                 </value>
                </adps>
               </value>
              </site>
              <annotations type="Annotations" >
               <annotations type="Container" >
                <count type="int" >1</count>
                <item type="Handle" >
                 <serial_number type="int" >329</serial_number>
                 <value type="FileOrdering" >
                  <value type="Handle" >
                   <serial_number type="int" >330</serial_number>
                   <value type="FileOrdering" >
                    <file_order type="int" >53</file_order>
                   </value>
                  </value>
                 </value>
                </item>
               </annotations>
              </annotations>
             </value>
            </item>
            <item type="Handle" >
             <serial_number type="int" >331</serial_number>
             <value type="Atom3d" >
              <element type="Element" >
               <code type="char" >1</code>
              </element>
              <formal_charge type="int" >0</formal_charge>
              <radius type="float" >0.68000000000000005</radius>
              <label type="string" >C26</label>
              <site type="Handle" >
               <serial_number type="int" >332</serial_number>
               <value type="Site" >
                <orthogonal type="Point" >
                 <coordinates type="Vector" >
                  <vector type="Container" >
                   <count type="int" >3</count>
                   <item type="float" >4.6529923470460837</item>
                   <item type="float" >8.0694036799999989</item>
                   <item type="float" >6.1317765999506157</item>
                  </vector>
                 </coordinates>
                </orthogonal>
                <fractional type="Point" >
                 <coordinates type="Vector" >
                  <vector type="Container" >
                   <count type="int" >3</count>
                   <item type="float" >0.33350000000000002</item>
                   <item type="float" >1.0893999999999999</item>
                   <item type="float" >0.18426000000000001</item>
                  </vector>
                 </coordinates>
                </fractional>
                <uncertain_value type="UncertainValue" >
                 <value type="float" >1</value>
                 <uncertainty type="Uncertainty" >
                  <precision type="int" >0</precision>
                  <uncertainty type="int" >0</uncertainty>
                 </uncertainty>
                </uncertain_value>
                <uncertainty type="Handle" >
                 <serial_number type="int" >333</serial_number>
                 <value type="Container" >
                  <count type="int" >3</count>
                  <item type="Uncertainty" >
                   <precision type="int" >4</precision>
                   <uncertainty type="int" >2</uncertainty>
                  </item>
                  <item type="Uncertainty" >
                   <precision type="int" >4</precision>
                   <uncertainty type="int" >4</uncertainty>
                  </item>
                  <item type="Uncertainty" >
                   <precision type="int" >5</precision>
                   <uncertainty type="int" >9</uncertainty>
                  </item>
                 </value>
                </uncertainty>
                <adps type="Handle" >
                 <serial_number type="int" >334</serial_number>
                 <value type="AtomicDisplacementParameters" >
                  <uvalues type="Container" >
                   <count type="int" >6</count>
                   <item type="UncertainValue" >
                    <value type="float" >0.023699999999999999</value>
                    <uncertainty type="Uncertainty" >
                     <precision type="int" >4</precision>
                     <uncertainty type="int" >19</uncertainty>
                    </uncertainty>
                   </item>
                   <item type="UncertainValue" >
                    <value type="float" >0.023300000000000001</value>
                    <uncertainty type="Uncertainty" >
                     <precision type="int" >4</precision>
                     <uncertainty type="int" >19</uncertainty>
                    </uncertainty>
                   </item>
                   <item type="UncertainValue" >
                    <value type="float" >0.020400000000000001</value>
                    <uncertainty type="Uncertainty" >
                     <precision type="int" >4</precision>
                     <uncertainty type="int" >17</uncertainty>
                    </uncertainty>
                   </item>
                   <item type="UncertainValue" >
                    <value type="float" >0.0028</value>
                    <uncertainty type="Uncertainty" >
                     <precision type="int" >4</precision>
                     <uncertainty type="int" >15</uncertainty>
                    </uncertainty>
                   </item>
                   <item type="UncertainValue" >
                    <value type="float" >-0.0058999999999999999</value>
                    <uncertainty type="Uncertainty" >
                     <precision type="int" >4</precision>
                     <uncertainty type="int" >14</uncertainty>
                    </uncertainty>
                   </item>
                   <item type="UncertainValue" >
                    <value type="float" >-0.00080000000000000004</value>
                    <uncertainty type="Uncertainty" >
                     <precision type="int" >4</precision>
                     <uncertainty type="int" >15</uncertainty>
                    </uncertainty>
                   </item>
                  </uvalues>
                  <type type="AtomicDisplacementParameters::Type" >
                   <enumerator type="int" >0</enumerator>
                  </type>
                  <u_equivalent type="float" >0.02257838345350088</u_equivalent>
                 </value>
                </adps>
               </value>
              </site>
              <annotations type="Annotations" >
               <annotations type="Container" >
                <count type="int" >1</count>
                <item type="Handle" >
                 <serial_number type="int" >335</serial_number>
                 <value type="FileOrdering" >
                  <value type="Handle" >
                   <serial_number type="int" >336</serial_number>
                   <value type="FileOrdering" >
                    <file_order type="int" >54</file_order>
                   </value>
                  </value>
                 </value>
                </item>
               </annotations>
              </annotations>
             </value>
            </item>
            <item type="Handle" >
             <serial_number type="int" >337</serial_number>
             <value type="Atom3d" >
              <element type="Element" >
               <code type="char" >1</code>
              </element>
              <formal_charge type="int" >0</formal_charge>
              <radius type="float" >0.68000000000000005</radius>
              <label type="string" >C27</label>
              <site type="Handle" >
               <serial_number type="int" >338</serial_number>
               <value type="Site" >
                <orthogonal type="Point" >
                 <coordinates type="Vector" >
                  <vector type="Container" >
                   <count type="int" >3</count>
                   <item type="float" >3.0606550777255386</item>
                   <item type="float" >6.0546452799999999</item>
                   <item type="float" >5.8332742874489494</item>
                  </vector>
                 </coordinates>
                </orthogonal>
                <fractional type="Point" >
                 <coordinates type="Vector" >
                  <vector type="Container" >
                   <count type="int" >3</count>
                   <item type="float" >0.22259999999999999</item>
                   <item type="float" >0.81740000000000002</item>
                   <item type="float" >0.17529</item>
                  </vector>
                 </coordinates>
                </fractional>
                <uncertain_value type="UncertainValue" >
                 <value type="float" >1</value>
                 <uncertainty type="Uncertainty" >
                  <precision type="int" >0</precision>
                  <uncertainty type="int" >0</uncertainty>
                 </uncertainty>
                </uncertain_value>
                <uncertainty type="Handle" >
                 <serial_number type="int" >339</serial_number>
                 <value type="Container" >
                  <count type="int" >3</count>
                  <item type="Uncertainty" >
                   <precision type="int" >4</precision>
                   <uncertainty type="int" >2</uncertainty>
                  </item>
                  <item type="Uncertainty" >
                   <precision type="int" >4</precision>
                   <uncertainty type="int" >5</uncertainty>
                  </item>
                  <item type="Uncertainty" >
                   <precision type="int" >5</precision>
                   <uncertainty type="int" >10</uncertainty>
                  </item>
                 </value>
                </uncertainty>
                <adps type="Handle" >
                 <serial_number type="int" >340</serial_number>
                 <value type="AtomicDisplacementParameters" >
                  <uvalues type="Container" >
                   <count type="int" >6</count>
                   <item type="UncertainValue" >
                    <value type="float" >0.028000000000000001</value>
                    <uncertainty type="Uncertainty" >
                     <precision type="int" >3</precision>
                     <uncertainty type="int" >2</uncertainty>
                    </uncertainty>
                   </item>
                   <item type="UncertainValue" >
                    <value type="float" >0.036999999999999998</value>
                    <uncertainty type="Uncertainty" >
                     <precision type="int" >3</precision>
                     <uncertainty type="int" >2</uncertainty>
                    </uncertainty>
                   </item>
                   <item type="UncertainValue" >
                    <value type="float" >0.033000000000000002</value>
                    <uncertainty type="Uncertainty" >
                     <precision type="int" >3</precision>
                     <uncertainty type="int" >2</uncertainty>
                    </uncertainty>
                   </item>
                   <item type="UncertainValue" >
                    <value type="float" >-0.0091000000000000004</value>
                    <uncertainty type="Uncertainty" >
                     <precision type="int" >4</precision>
                     <uncertainty type="int" >18</uncertainty>
                    </uncertainty>
                   </item>
                   <item type="UncertainValue" >
                    <value type="float" >-0.0061999999999999998</value>
                    <uncertainty type="Uncertainty" >
                     <precision type="int" >4</precision>
                     <uncertainty type="int" >16</uncertainty>
                    </uncertainty>
                   </item>
                   <item type="UncertainValue" >
                    <value type="float" >0.0053</value>
                    <uncertainty type="Uncertainty" >
                     <precision type="int" >4</precision>
                     <uncertainty type="int" >17</uncertainty>
                    </uncertainty>
                   </item>
                  </uvalues>
                  <type type="AtomicDisplacementParameters::Type" >
                   <enumerator type="int" >0</enumerator>
                  </type>
                  <u_equivalent type="float" >0.032787338682641026</u_equivalent>
                 </value>
                </adps>
               </value>
              </site>
              <annotations type="Annotations" >
               <annotations type="Container" >
                <count type="int" >1</count>
                <item type="Handle" >
                 <serial_number type="int" >341</serial_number>
                 <value type="FileOrdering" >
                  <value type="Handle" >
                   <serial_number type="int" >342</serial_number>
                   <value type="FileOrdering" >
                    <file_order type="int" >55</file_order>
                   </value>
                  </value>
                 </value>
                </item>
               </annotations>
              </annotations>
             </value>
            </item>
            <item type="Handle" >
             <serial_number type="int" >343</serial_number>
             <value type="Atom3d" >
              <element type="Element" >
               <code type="char" >2</code>
              </element>
              <formal_charge type="int" >0</formal_charge>
              <radius type="float" >0.23000000000000001</radius>
              <label type="string" >H27A</label>
              <site type="Handle" >
               <serial_number type="int" >344</serial_number>
               <value type="Site" >
                <orthogonal type="Point" >
                 <coordinates type="Vector" >
                  <vector type="Container" >
                   <count type="int" >3</count>
                   <item type="float" >3.0436359820465593</item>
                   <item type="float" >5.1376339199999999</item>
                   <item type="float" >5.4875174282636303</item>
                  </vector>
                 </coordinates>
                </orthogonal>
                <fractional type="Point" >
                 <coordinates type="Vector" >
                  <vector type="Container" >
                   <count type="int" >3</count>
                   <item type="float" >0.2208</item>
                   <item type="float" >0.69359999999999999</item>
                   <item type="float" >0.16489999999999999</item>
                  </vector>
                 </coordinates>
                </fractional>
                <uncertain_value type="UncertainValue" >
                 <value type="float" >1</value>
                 <uncertainty type="Uncertainty" >
                  <precision type="int" >0</precision>
                  <uncertainty type="int" >0</uncertainty>
                 </uncertainty>
                </uncertain_value>
                <uncertainty type="Handle" >
                 <serial_number type="int" >345</serial_number>
                 <value type="Container" >
                  <count type="int" >3</count>
                  <item type="Uncertainty" >
                   <precision type="int" >4</precision>
                   <uncertainty type="int" >0</uncertainty>
                  </item>
                  <item type="Uncertainty" >
                   <precision type="int" >4</precision>
                   <uncertainty type="int" >0</uncertainty>
                  </item>
                  <item type="Uncertainty" >
                   <precision type="int" >4</precision>
                   <uncertainty type="int" >0</uncertainty>
                  </item>
                 </value>
                </uncertainty>
                <adps type="Handle" >
                 <serial_number type="int" >346</serial_number>
                 <value type="AtomicDisplacementParameters" >
                  <uvalues type="Container" >
                   <count type="int" >6</count>
                   <item type="UncertainValue" >
                    <value type="float" >0.049000000000000016</value>
                    <uncertainty type="Uncertainty" >
                     <precision type="int" >1000000</precision>
                     <uncertainty type="int" >0</uncertainty>
                    </uncertainty>
                   </item>
                   <item type="UncertainValue" >
                    <value type="float" >0.049000000000000016</value>
                    <uncertainty type="Uncertainty" >
                     <precision type="int" >1000000</precision>
                     <uncertainty type="int" >0</uncertainty>
                    </uncertainty>
                   </item>
                   <item type="UncertainValue" >
                    <value type="float" >0.049000000000000016</value>
                    <uncertainty type="Uncertainty" >
                     <precision type="int" >1000000</precision>
                     <uncertainty type="int" >0</uncertainty>
                    </uncertainty>
                   </item>
                   <item type="UncertainValue" >
                    <value type="float" >-3.0790669817386851e-18</value>
                    <uncertainty type="Uncertainty" >
                     <precision type="int" >1000000</precision>
                     <uncertainty type="int" >0</uncertainty>
                    </uncertainty>
                   </item>
                   <item type="UncertainValue" >
                    <value type="float" >0.0012681368001829277</value>
                    <uncertainty type="Uncertainty" >
                     <precision type="int" >1000000</precision>
                     <uncertainty type="int" >0</uncertainty>
                    </uncertainty>
                   </item>
                   <item type="UncertainValue" >
                    <value type="float" >-3.0790669817386858e-18</value>
                    <uncertainty type="Uncertainty" >
                     <precision type="int" >1000000</precision>
                     <uncertainty type="int" >0</uncertainty>
                    </uncertainty>
                   </item>
                  </uvalues>
                  <type type="AtomicDisplacementParameters::Type" >
                   <enumerator type="int" >1</enumerator>
                  </type>
                  <u_equivalent type="float" >0.049000000000000002</u_equivalent>
                 </value>
                </adps>
               </value>
              </site>
              <annotations type="Annotations" >
               <annotations type="Container" >
                <count type="int" >1</count>
                <item type="Handle" >
                 <serial_number type="int" >347</serial_number>
                 <value type="FileOrdering" >
                  <value type="Handle" >
                   <serial_number type="int" >348</serial_number>
                   <value type="FileOrdering" >
                    <file_order type="int" >56</file_order>
                   </value>
                  </value>
                 </value>
                </item>
               </annotations>
              </annotations>
             </value>
            </item>
            <item type="Handle" >
             <serial_number type="int" >349</serial_number>
             <value type="Atom3d" >
              <element type="Element" >
               <code type="char" >2</code>
              </element>
              <formal_charge type="int" >0</formal_charge>
              <radius type="float" >0.23000000000000001</radius>
              <label type="string" >H27B</label>
              <site type="Handle" >
               <serial_number type="int" >350</serial_number>
               <value type="Site" >
                <orthogonal type="Point" >
                 <coordinates type="Vector" >
                  <vector type="Container" >
                   <count type="int" >3</count>
                   <item type="float" >2.2861659820465592</item>
                   <item type="float" >6.5472240799999994</item>
                   <item type="float" >5.4875174282636303</item>
                  </vector>
                 </coordinates>
                </orthogonal>
                <fractional type="Point" >
                 <coordinates type="Vector" >
                  <vector type="Container" >
                   <count type="int" >3</count>
                   <item type="float" >0.16830000000000001</item>
                   <item type="float" >0.88390000000000002</item>
                   <item type="float" >0.16489999999999999</item>
                  </vector>
                 </coordinates>
                </fractional>
                <uncertain_value type="UncertainValue" >
                 <value type="float" >1</value>
                 <uncertainty type="Uncertainty" >
                  <precision type="int" >0</precision>
                  <uncertainty type="int" >0</uncertainty>
                 </uncertainty>
                </uncertain_value>
                <uncertainty type="Handle" >
                 <serial_number type="int" >351</serial_number>
                 <value type="Container" >
                  <count type="int" >3</count>
                  <item type="Uncertainty" >
                   <precision type="int" >4</precision>
                   <uncertainty type="int" >0</uncertainty>
                  </item>
                  <item type="Uncertainty" >
                   <precision type="int" >4</precision>
                   <uncertainty type="int" >0</uncertainty>
                  </item>
                  <item type="Uncertainty" >
                   <precision type="int" >4</precision>
                   <uncertainty type="int" >0</uncertainty>
                  </item>
                 </value>
                </uncertainty>
                <adps type="Handle" >
                 <serial_number type="int" >352</serial_number>
                 <value type="AtomicDisplacementParameters" >
                  <uvalues type="Container" >
                   <count type="int" >6</count>
                   <item type="UncertainValue" >
                    <value type="float" >0.049000000000000016</value>
                    <uncertainty type="Uncertainty" >
                     <precision type="int" >1000000</precision>
                     <uncertainty type="int" >0</uncertainty>
                    </uncertainty>
                   </item>
                   <item type="UncertainValue" >
                    <value type="float" >0.049000000000000016</value>
                    <uncertainty type="Uncertainty" >
                     <precision type="int" >1000000</precision>
                     <uncertainty type="int" >0</uncertainty>
                    </uncertainty>
                   </item>
                   <item type="UncertainValue" >
                    <value type="float" >0.049000000000000016</value>
                    <uncertainty type="Uncertainty" >
                     <precision type="int" >1000000</precision>
                     <uncertainty type="int" >0</uncertainty>
                    </uncertainty>
                   </item>
                   <item type="UncertainValue" >
                    <value type="float" >-3.0790669817386851e-18</value>
                    <uncertainty type="Uncertainty" >
                     <precision type="int" >1000000</precision>
                     <uncertainty type="int" >0</uncertainty>
                    </uncertainty>
                   </item>
                   <item type="UncertainValue" >
                    <value type="float" >0.0012681368001829277</value>
                    <uncertainty type="Uncertainty" >
                     <precision type="int" >1000000</precision>
                     <uncertainty type="int" >0</uncertainty>
                    </uncertainty>
                   </item>
                   <item type="UncertainValue" >
                    <value type="float" >-3.0790669817386858e-18</value>
                    <uncertainty type="Uncertainty" >
                     <precision type="int" >1000000</precision>
                     <uncertainty type="int" >0</uncertainty>
                    </uncertainty>
                   </item>
                  </uvalues>
                  <type type="AtomicDisplacementParameters::Type" >
                   <enumerator type="int" >1</enumerator>
                  </type>
                  <u_equivalent type="float" >0.049000000000000002</u_equivalent>
                 </value>
                </adps>
               </value>
              </site>
              <annotations type="Annotations" >
               <annotations type="Container" >
                <count type="int" >1</count>
                <item type="Handle" >
                 <serial_number type="int" >353</serial_number>
                 <value type="FileOrdering" >
                  <value type="Handle" >
                   <serial_number type="int" >354</serial_number>
                   <value type="FileOrdering" >
                    <file_order type="int" >57</file_order>
                   </value>
                  </value>
                 </value>
                </item>
               </annotations>
              </annotations>
             </value>
            </item>
            <item type="Handle" >
             <serial_number type="int" >355</serial_number>
             <value type="Atom3d" >
              <element type="Element" >
               <code type="char" >2</code>
              </element>
              <formal_charge type="int" >0</formal_charge>
              <radius type="float" >0.23000000000000001</radius>
              <label type="string" >H27C</label>
              <site type="Handle" >
               <serial_number type="int" >356</serial_number>
               <value type="Site" >
                <orthogonal type="Point" >
                 <coordinates type="Vector" >
                  <vector type="Container" >
                   <count type="int" >3</count>
                   <item type="float" >3.0252178588534298</item>
                   <item type="float" >6.0346458399999996</item>
                   <item type="float" >6.8119758493969993</item>
                  </vector>
                 </coordinates>
                </orthogonal>
                <fractional type="Point" >
                 <coordinates type="Vector" >
                  <vector type="Container" >
                   <count type="int" >3</count>
                   <item type="float" >0.22189999999999999</item>
                   <item type="float" >0.81469999999999998</item>
                   <item type="float" >0.20469999999999999</item>
                  </vector>
                 </coordinates>
                </fractional>
                <uncertain_value type="UncertainValue" >
                 <value type="float" >1</value>
                 <uncertainty type="Uncertainty" >
                  <precision type="int" >0</precision>
                  <uncertainty type="int" >0</uncertainty>
                 </uncertainty>
                </uncertain_value>
                <uncertainty type="Handle" >
                 <serial_number type="int" >357</serial_number>
                 <value type="Container" >
                  <count type="int" >3</count>
                  <item type="Uncertainty" >
                   <precision type="int" >4</precision>
                   <uncertainty type="int" >0</uncertainty>
                  </item>
                  <item type="Uncertainty" >
                   <precision type="int" >4</precision>
                   <uncertainty type="int" >0</uncertainty>
                  </item>
                  <item type="Uncertainty" >
                   <precision type="int" >4</precision>
                   <uncertainty type="int" >0</uncertainty>
                  </item>
                 </value>
                </uncertainty>
                <adps type="Handle" >
                 <serial_number type="int" >358</serial_number>
                 <value type="AtomicDisplacementParameters" >
                  <uvalues type="Container" >
                   <count type="int" >6</count>
                   <item type="UncertainValue" >
                    <value type="float" >0.049000000000000016</value>
                    <uncertainty type="Uncertainty" >
                     <precision type="int" >1000000</precision>
                     <uncertainty type="int" >0</uncertainty>
                    </uncertainty>
                   </item>
                   <item type="UncertainValue" >
                    <value type="float" >0.049000000000000016</value>
                    <uncertainty type="Uncertainty" >
                     <precision type="int" >1000000</precision>
                     <uncertainty type="int" >0</uncertainty>
                    </uncertainty>
                   </item>
                   <item type="UncertainValue" >
                    <value type="float" >0.049000000000000016</value>
                    <uncertainty type="Uncertainty" >
                     <precision type="int" >1000000</precision>
                     <uncertainty type="int" >0</uncertainty>
                    </uncertainty>
                   </item>
                   <item type="UncertainValue" >
                    <value type="float" >-3.0790669817386851e-18</value>
                    <uncertainty type="Uncertainty" >
                     <precision type="int" >1000000</precision>
                     <uncertainty type="int" >0</uncertainty>
                    </uncertainty>
                   </item>
                   <item type="UncertainValue" >
                    <value type="float" >0.0012681368001829277</value>
                    <uncertainty type="Uncertainty" >
                     <precision type="int" >1000000</precision>
                     <uncertainty type="int" >0</uncertainty>
                    </uncertainty>
                   </item>
                   <item type="UncertainValue" >
                    <value type="float" >-3.0790669817386858e-18</value>
                    <uncertainty type="Uncertainty" >
                     <precision type="int" >1000000</precision>
                     <uncertainty type="int" >0</uncertainty>
                    </uncertainty>
                   </item>
                  </uvalues>
                  <type type="AtomicDisplacementParameters::Type" >
                   <enumerator type="int" >1</enumerator>
                  </type>
                  <u_equivalent type="float" >0.049000000000000002</u_equivalent>
                 </value>
                </adps>
               </value>
              </site>
              <annotations type="Annotations" >
               <annotations type="Container" >
                <count type="int" >1</count>
                <item type="Handle" >
                 <serial_number type="int" >359</serial_number>
                 <value type="FileOrdering" >
                  <value type="Handle" >
                   <serial_number type="int" >360</serial_number>
                   <value type="FileOrdering" >
                    <file_order type="int" >58</file_order>
                   </value>
                  </value>
                 </value>
                </item>
               </annotations>
              </annotations>
             </value>
            </item>
            <item type="Handle" >
             <serial_number type="int" >361</serial_number>
             <value type="Atom3d" >
              <element type="Element" >
               <code type="char" >1</code>
              </element>
              <formal_charge type="int" >0</formal_charge>
              <radius type="float" >0.68000000000000005</radius>
              <label type="string" >C28</label>
              <site type="Handle" >
               <serial_number type="int" >362</serial_number>
               <value type="Site" >
                <orthogonal type="Point" >
                 <coordinates type="Vector" >
                  <vector type="Container" >
                   <count type="int" >3</count>
                   <item type="float" >4.3970460369237898</item>
                   <item type="float" >6.8175868799999995</item>
                   <item type="float" >3.8688828150996342</item>
                  </vector>
                 </coordinates>
                </orthogonal>
                <fractional type="Point" >
                 <coordinates type="Vector" >
                  <vector type="Container" >
                   <count type="int" >3</count>
                   <item type="float" >0.31169999999999998</item>
                   <item type="float" >0.9204</item>
                   <item type="float" >0.11626</item>
                  </vector>
                 </coordinates>
                </fractional>
                <uncertain_value type="UncertainValue" >
                 <value type="float" >1</value>
                 <uncertainty type="Uncertainty" >
                  <precision type="int" >0</precision>
                  <uncertainty type="int" >0</uncertainty>
                 </uncertainty>
                </uncertain_value>
                <uncertainty type="Handle" >
                 <serial_number type="int" >363</serial_number>
                 <value type="Container" >
                  <count type="int" >3</count>
                  <item type="Uncertainty" >
                   <precision type="int" >4</precision>
                   <uncertainty type="int" >2</uncertainty>
                  </item>
                  <item type="Uncertainty" >
                   <precision type="int" >4</precision>
                   <uncertainty type="int" >5</uncertainty>
                  </item>
                  <item type="Uncertainty" >
                   <precision type="int" >5</precision>
                   <uncertainty type="int" >9</uncertainty>
                  </item>
                 </value>
                </uncertainty>
                <adps type="Handle" >
                 <serial_number type="int" >364</serial_number>
                 <value type="AtomicDisplacementParameters" >
                  <uvalues type="Container" >
                   <count type="int" >6</count>
                   <item type="UncertainValue" >
                    <value type="float" >0.040000000000000001</value>
                    <uncertainty type="Uncertainty" >
                     <precision type="int" >3</precision>
                     <uncertainty type="int" >2</uncertainty>
                    </uncertainty>
                   </item>
                   <item type="UncertainValue" >
                    <value type="float" >0.035999999999999997</value>
                    <uncertainty type="Uncertainty" >
                     <precision type="int" >3</precision>
                     <uncertainty type="int" >2</uncertainty>
                    </uncertainty>
                   </item>
                   <item type="UncertainValue" >
                    <value type="float" >0.021700000000000001</value>
                    <uncertainty type="Uncertainty" >
                     <precision type="int" >4</precision>
                     <uncertainty type="int" >18</uncertainty>
                    </uncertainty>
                   </item>
                   <item type="UncertainValue" >
                    <value type="float" >-0.00020000000000000001</value>
                    <uncertainty type="Uncertainty" >
                     <precision type="int" >4</precision>
                     <uncertainty type="int" >18</uncertainty>
                    </uncertainty>
                   </item>
                   <item type="UncertainValue" >
                    <value type="float" >-0.0114</value>
                    <uncertainty type="Uncertainty" >
                     <precision type="int" >4</precision>
                     <uncertainty type="int" >16</uncertainty>
                    </uncertainty>
                   </item>
                   <item type="UncertainValue" >
                    <value type="float" >-0.0023</value>
                    <uncertainty type="Uncertainty" >
                     <precision type="int" >4</precision>
                     <uncertainty type="int" >16</uncertainty>
                    </uncertainty>
                   </item>
                  </uvalues>
                  <type type="AtomicDisplacementParameters::Type" >
                   <enumerator type="int" >0</enumerator>
                  </type>
                  <u_equivalent type="float" >0.032777273727179472</u_equivalent>
                 </value>
                </adps>
               </value>
              </site>
              <annotations type="Annotations" >
               <annotations type="Container" >
                <count type="int" >1</count>
                <item type="Handle" >
                 <serial_number type="int" >365</serial_number>
                 <value type="FileOrdering" >
                  <value type="Handle" >
                   <serial_number type="int" >366</serial_number>
                   <value type="FileOrdering" >
                    <file_order type="int" >59</file_order>
                   </value>
                  </value>
                 </value>
                </item>
               </annotations>
              </annotations>
             </value>
            </item>
            <item type="Handle" >
             <serial_number type="int" >367</serial_number>
             <value type="Atom3d" >
              <element type="Element" >
               <code type="char" >2</code>
              </element>
              <formal_charge type="int" >0</formal_charge>
              <radius type="float" >0.23000000000000001</radius>
              <label type="string" >H28A</label>
              <site type="Handle" >
               <serial_number type="int" >368</serial_number>
               <value type="Site" >
                <orthogonal type="Point" >
                 <coordinates type="Vector" >
                  <vector type="Container" >
                   <count type="int" >3</count>
                   <item type="float" >5.2902999400025124</item>
                   <item type="float" >7.1064676799999997</item>
                   <item type="float" >3.5840244210066285</item>
                  </vector>
                 </coordinates>
                </orthogonal>
                <fractional type="Point" >
                 <coordinates type="Vector" >
                  <vector type="Container" >
                   <count type="int" >3</count>
                   <item type="float" >0.37309999999999999</item>
                   <item type="float" >0.95940000000000003</item>
                   <item type="float" >0.1077</item>
                  </vector>
                 </coordinates>
                </fractional>
                <uncertain_value type="UncertainValue" >
                 <value type="float" >1</value>
                 <uncertainty type="Uncertainty" >
                  <precision type="int" >0</precision>
                  <uncertainty type="int" >0</uncertainty>
                 </uncertainty>
                </uncertain_value>
                <uncertainty type="Handle" >
                 <serial_number type="int" >369</serial_number>
                 <value type="Container" >
                  <count type="int" >3</count>
                  <item type="Uncertainty" >
                   <precision type="int" >4</precision>
                   <uncertainty type="int" >0</uncertainty>
                  </item>
                  <item type="Uncertainty" >
                   <precision type="int" >4</precision>
                   <uncertainty type="int" >0</uncertainty>
                  </item>
                  <item type="Uncertainty" >
                   <precision type="int" >4</precision>
                   <uncertainty type="int" >0</uncertainty>
                  </item>
                 </value>
                </uncertainty>
                <adps type="Handle" >
                 <serial_number type="int" >370</serial_number>
                 <value type="AtomicDisplacementParameters" >
                  <uvalues type="Container" >
                   <count type="int" >6</count>
                   <item type="UncertainValue" >
                    <value type="float" >0.049000000000000016</value>
                    <uncertainty type="Uncertainty" >
                     <precision type="int" >1000000</precision>
                     <uncertainty type="int" >0</uncertainty>
                    </uncertainty>
                   </item>
                   <item type="UncertainValue" >
                    <value type="float" >0.049000000000000016</value>
                    <uncertainty type="Uncertainty" >
                     <precision type="int" >1000000</precision>
                     <uncertainty type="int" >0</uncertainty>
                    </uncertainty>
                   </item>
                   <item type="UncertainValue" >
                    <value type="float" >0.049000000000000016</value>
                    <uncertainty type="Uncertainty" >
                     <precision type="int" >1000000</precision>
                     <uncertainty type="int" >0</uncertainty>
                    </uncertainty>
                   </item>
                   <item type="UncertainValue" >
                    <value type="float" >-3.0790669817386851e-18</value>
                    <uncertainty type="Uncertainty" >
                     <precision type="int" >1000000</precision>
                     <uncertainty type="int" >0</uncertainty>
                    </uncertainty>
                   </item>
                   <item type="UncertainValue" >
                    <value type="float" >0.0012681368001829277</value>
                    <uncertainty type="Uncertainty" >
                     <precision type="int" >1000000</precision>
                     <uncertainty type="int" >0</uncertainty>
                    </uncertainty>
                   </item>
                   <item type="UncertainValue" >
                    <value type="float" >-3.0790669817386858e-18</value>
                    <uncertainty type="Uncertainty" >
                     <precision type="int" >1000000</precision>
                     <uncertainty type="int" >0</uncertainty>
                    </uncertainty>
                   </item>
                  </uvalues>
                  <type type="AtomicDisplacementParameters::Type" >
                   <enumerator type="int" >1</enumerator>
                  </type>
                  <u_equivalent type="float" >0.049000000000000002</u_equivalent>
                 </value>
                </adps>
               </value>
              </site>
              <annotations type="Annotations" >
               <annotations type="Container" >
                <count type="int" >1</count>
                <item type="Handle" >
                 <serial_number type="int" >371</serial_number>
                 <value type="FileOrdering" >
                  <value type="Handle" >
                   <serial_number type="int" >372</serial_number>
                   <value type="FileOrdering" >
                    <file_order type="int" >60</file_order>
                   </value>
                  </value>
                 </value>
                </item>
               </annotations>
              </annotations>
             </value>
            </item>
            <item type="Handle" >
             <serial_number type="int" >373</serial_number>
             <value type="Atom3d" >
              <element type="Element" >
               <code type="char" >2</code>
              </element>
              <formal_charge type="int" >0</formal_charge>
              <radius type="float" >0.23000000000000001</radius>
              <label type="string" >H28B</label>
              <site type="Handle" >
               <serial_number type="int" >374</serial_number>
               <value type="Site" >
                <orthogonal type="Point" >
                 <coordinates type="Vector" >
                  <vector type="Container" >
                   <count type="int" >3</count>
                   <item type="float" >3.7300518707360095</item>
                   <item type="float" >7.4597911200000002</item>
                   <item type="float" >3.550746571229408</item>
                  </vector>
                 </coordinates>
                </orthogonal>
                <fractional type="Point" >
                 <coordinates type="Vector" >
                  <vector type="Container" >
                   <count type="int" >3</count>
                   <item type="float" >0.26490000000000002</item>
                   <item type="float" >1.0071000000000001</item>
                   <item type="float" >0.1067</item>
                  </vector>
                 </coordinates>
                </fractional>
                <uncertain_value type="UncertainValue" >
                 <value type="float" >1</value>
                 <uncertainty type="Uncertainty" >
                  <precision type="int" >0</precision>
                  <uncertainty type="int" >0</uncertainty>
                 </uncertainty>
                </uncertain_value>
                <uncertainty type="Handle" >
                 <serial_number type="int" >375</serial_number>
                 <value type="Container" >
                  <count type="int" >3</count>
                  <item type="Uncertainty" >
                   <precision type="int" >4</precision>
                   <uncertainty type="int" >0</uncertainty>
                  </item>
                  <item type="Uncertainty" >
                   <precision type="int" >4</precision>
                   <uncertainty type="int" >0</uncertainty>
                  </item>
                  <item type="Uncertainty" >
                   <precision type="int" >4</precision>
                   <uncertainty type="int" >0</uncertainty>
                  </item>
                 </value>
                </uncertainty>
                <adps type="Handle" >
                 <serial_number type="int" >376</serial_number>
                 <value type="AtomicDisplacementParameters" >
                  <uvalues type="Container" >
                   <count type="int" >6</count>
                   <item type="UncertainValue" >
                    <value type="float" >0.049000000000000016</value>
                    <uncertainty type="Uncertainty" >
                     <precision type="int" >1000000</precision>
                     <uncertainty type="int" >0</uncertainty>
                    </uncertainty>
                   </item>
                   <item type="UncertainValue" >
                    <value type="float" >0.049000000000000016</value>
                    <uncertainty type="Uncertainty" >
                     <precision type="int" >1000000</precision>
                     <uncertainty type="int" >0</uncertainty>
                    </uncertainty>
                   </item>
                   <item type="UncertainValue" >
                    <value type="float" >0.049000000000000016</value>
                    <uncertainty type="Uncertainty" >
                     <precision type="int" >1000000</precision>
                     <uncertainty type="int" >0</uncertainty>
                    </uncertainty>
                   </item>
                   <item type="UncertainValue" >
                    <value type="float" >-3.0790669817386851e-18</value>
                    <uncertainty type="Uncertainty" >
                     <precision type="int" >1000000</precision>
                     <uncertainty type="int" >0</uncertainty>
                    </uncertainty>
                   </item>
                   <item type="UncertainValue" >
                    <value type="float" >0.0012681368001829277</value>
                    <uncertainty type="Uncertainty" >
                     <precision type="int" >1000000</precision>
                     <uncertainty type="int" >0</uncertainty>
                    </uncertainty>
                   </item>
                   <item type="UncertainValue" >
                    <value type="float" >-3.0790669817386858e-18</value>
                    <uncertainty type="Uncertainty" >
                     <precision type="int" >1000000</precision>
                     <uncertainty type="int" >0</uncertainty>
                    </uncertainty>
                   </item>
                  </uvalues>
                  <type type="AtomicDisplacementParameters::Type" >
                   <enumerator type="int" >1</enumerator>
                  </type>
                  <u_equivalent type="float" >0.049000000000000002</u_equivalent>
                 </value>
                </adps>
               </value>
              </site>
              <annotations type="Annotations" >
               <annotations type="Container" >
                <count type="int" >1</count>
                <item type="Handle" >
                 <serial_number type="int" >377</serial_number>
                 <value type="FileOrdering" >
                  <value type="Handle" >
                   <serial_number type="int" >378</serial_number>
                   <value type="FileOrdering" >
                    <file_order type="int" >61</file_order>
                   </value>
                  </value>
                 </value>
                </item>
               </annotations>
              </annotations>
             </value>
            </item>
            <item type="Handle" >
             <serial_number type="int" >379</serial_number>
             <value type="Atom3d" >
              <element type="Element" >
               <code type="char" >2</code>
              </element>
              <formal_charge type="int" >0</formal_charge>
              <radius type="float" >0.23000000000000001</radius>
              <label type="string" >H28C</label>
              <site type="Handle" >
               <serial_number type="int" >380</serial_number>
               <value type="Site" >
                <orthogonal type="Point" >
                 <coordinates type="Vector" >
                  <vector type="Container" >
                   <count type="int" >3</count>
                   <item type="float" >4.2061976729829516</item>
                   <item type="float" >5.9331671999999998</item>
                   <item type="float" >3.4941742266081333</item>
                  </vector>
                 </coordinates>
                </orthogonal>
                <fractional type="Point" >
                 <coordinates type="Vector" >
                  <vector type="Container" >
                   <count type="int" >3</count>
                   <item type="float" >0.29780000000000001</item>
                   <item type="float" >0.80100000000000005</item>
                   <item type="float" >0.105</item>
                  </vector>
                 </coordinates>
                </fractional>
                <uncertain_value type="UncertainValue" >
                 <value type="float" >1</value>
                 <uncertainty type="Uncertainty" >
                  <precision type="int" >0</precision>
                  <uncertainty type="int" >0</uncertainty>
                 </uncertainty>
                </uncertain_value>
                <uncertainty type="Handle" >
                 <serial_number type="int" >381</serial_number>
                 <value type="Container" >
                  <count type="int" >3</count>
                  <item type="Uncertainty" >
                   <precision type="int" >4</precision>
                   <uncertainty type="int" >0</uncertainty>
                  </item>
                  <item type="Uncertainty" >
                   <precision type="int" >4</precision>
                   <uncertainty type="int" >0</uncertainty>
                  </item>
                  <item type="Uncertainty" >
                   <precision type="int" >4</precision>
                   <uncertainty type="int" >0</uncertainty>
                  </item>
                 </value>
                </uncertainty>
                <adps type="Handle" >
                 <serial_number type="int" >382</serial_number>
                 <value type="AtomicDisplacementParameters" >
                  <uvalues type="Container" >
                   <count type="int" >6</count>
                   <item type="UncertainValue" >
                    <value type="float" >0.049000000000000016</value>
                    <uncertainty type="Uncertainty" >
                     <precision type="int" >1000000</precision>
                     <uncertainty type="int" >0</uncertainty>
                    </uncertainty>
                   </item>
                   <item type="UncertainValue" >
                    <value type="float" >0.049000000000000016</value>
                    <uncertainty type="Uncertainty" >
                     <precision type="int" >1000000</precision>
                     <uncertainty type="int" >0</uncertainty>
                    </uncertainty>
                   </item>
                   <item type="UncertainValue" >
                    <value type="float" >0.049000000000000016</value>
                    <uncertainty type="Uncertainty" >
                     <precision type="int" >1000000</precision>
                     <uncertainty type="int" >0</uncertainty>
                    </uncertainty>
                   </item>
                   <item type="UncertainValue" >
                    <value type="float" >-3.0790669817386851e-18</value>
                    <uncertainty type="Uncertainty" >
                     <precision type="int" >1000000</precision>
                     <uncertainty type="int" >0</uncertainty>
                    </uncertainty>
                   </item>
                   <item type="UncertainValue" >
                    <value type="float" >0.0012681368001829277</value>
                    <uncertainty type="Uncertainty" >
                     <precision type="int" >1000000</precision>
                     <uncertainty type="int" >0</uncertainty>
                    </uncertainty>
                   </item>
                   <item type="UncertainValue" >
                    <value type="float" >-3.0790669817386858e-18</value>
                    <uncertainty type="Uncertainty" >
                     <precision type="int" >1000000</precision>
                     <uncertainty type="int" >0</uncertainty>
                    </uncertainty>
                   </item>
                  </uvalues>
                  <type type="AtomicDisplacementParameters::Type" >
                   <enumerator type="int" >1</enumerator>
                  </type>
                  <u_equivalent type="float" >0.049000000000000002</u_equivalent>
                 </value>
                </adps>
               </value>
              </site>
              <annotations type="Annotations" >
               <annotations type="Container" >
                <count type="int" >1</count>
                <item type="Handle" >
                 <serial_number type="int" >383</serial_number>
                 <value type="FileOrdering" >
                  <value type="Handle" >
                   <serial_number type="int" >384</serial_number>
                   <value type="FileOrdering" >
                    <file_order type="int" >62</file_order>
                   </value>
                  </value>
                 </value>
                </item>
               </annotations>
              </annotations>
             </value>
            </item>
            <item type="Handle" >
             <serial_number type="int" >385</serial_number>
             <value type="Atom3d" >
              <element type="Element" >
               <code type="char" >1</code>
              </element>
              <formal_charge type="int" >0</formal_charge>
              <radius type="float" >0.68000000000000005</radius>
              <label type="string" >C29</label>
              <site type="Handle" >
               <serial_number type="int" >386</serial_number>
               <value type="Site" >
                <orthogonal type="Point" >
                 <coordinates type="Vector" >
                  <vector type="Container" >
                   <count type="int" >3</count>
                   <item type="float" >3.4457847416015905</item>
                   <item type="float" >8.8893807199999983</item>
                   <item type="float" >6.5058196314465722</item>
                  </vector>
                 </coordinates>
                </orthogonal>
                <fractional type="Point" >
                 <coordinates type="Vector" >
                  <vector type="Container" >
                   <count type="int" >3</count>
                   <item type="float" >0.2505</item>
                   <item type="float" >1.2000999999999999</item>
                   <item type="float" >0.19550000000000001</item>
                  </vector>
                 </coordinates>
                </fractional>
                <uncertain_value type="UncertainValue" >
                 <value type="float" >1</value>
                 <uncertainty type="Uncertainty" >
                  <precision type="int" >0</precision>
                  <uncertainty type="int" >0</uncertainty>
                 </uncertainty>
                </uncertain_value>
                <uncertainty type="Handle" >
                 <serial_number type="int" >387</serial_number>
                 <value type="Container" >
                  <count type="int" >3</count>
                  <item type="Uncertainty" >
                   <precision type="int" >4</precision>
                   <uncertainty type="int" >2</uncertainty>
                  </item>
                  <item type="Uncertainty" >
                   <precision type="int" >4</precision>
                   <uncertainty type="int" >5</uncertainty>
                  </item>
                  <item type="Uncertainty" >
                   <precision type="int" >5</precision>
                   <uncertainty type="int" >10</uncertainty>
                  </item>
                 </value>
                </uncertainty>
                <adps type="Handle" >
                 <serial_number type="int" >388</serial_number>
                 <value type="AtomicDisplacementParameters" >
                  <uvalues type="Container" >
                   <count type="int" >6</count>
                   <item type="UncertainValue" >
                    <value type="float" >0.035000000000000003</value>
                    <uncertainty type="Uncertainty" >
                     <precision type="int" >3</precision>
                     <uncertainty type="int" >2</uncertainty>
                    </uncertainty>
                   </item>
                   <item type="UncertainValue" >
                    <value type="float" >0.033000000000000002</value>
                    <uncertainty type="Uncertainty" >
                     <precision type="int" >3</precision>
                     <uncertainty type="int" >2</uncertainty>
                    </uncertainty>
                   </item>
                   <item type="UncertainValue" >
                    <value type="float" >0.029000000000000001</value>
                    <uncertainty type="Uncertainty" >
                     <precision type="int" >3</precision>
                     <uncertainty type="int" >2</uncertainty>
                    </uncertainty>
                   </item>
                   <item type="UncertainValue" >
                    <value type="float" >0.0071999999999999998</value>
                    <uncertainty type="Uncertainty" >
                     <precision type="int" >4</precision>
                     <uncertainty type="int" >18</uncertainty>
                    </uncertainty>
                   </item>
                   <item type="UncertainValue" >
                    <value type="float" >-0.0038</value>
                    <uncertainty type="Uncertainty" >
                     <precision type="int" >4</precision>
                     <uncertainty type="int" >17</uncertainty>
                    </uncertainty>
                   </item>
                   <item type="UncertainValue" >
                    <value type="float" >0.0012999999999999999</value>
                    <uncertainty type="Uncertainty" >
                     <precision type="int" >4</precision>
                     <uncertainty type="int" >17</uncertainty>
                    </uncertainty>
                   </item>
                  </uvalues>
                  <type type="AtomicDisplacementParameters::Type" >
                   <enumerator type="int" >0</enumerator>
                  </type>
                  <u_equivalent type="float" >0.032413239288089236</u_equivalent>
                 </value>
                </adps>
               </value>
              </site>
              <annotations type="Annotations" >
               <annotations type="Container" >
                <count type="int" >1</count>
                <item type="Handle" >
                 <serial_number type="int" >389</serial_number>
                 <value type="FileOrdering" >
                  <value type="Handle" >
                   <serial_number type="int" >390</serial_number>
                   <value type="FileOrdering" >
                    <file_order type="int" >63</file_order>
                   </value>
                  </value>
                 </value>
                </item>
               </annotations>
              </annotations>
             </value>
            </item>
            <item type="Handle" >
             <serial_number type="int" >391</serial_number>
             <value type="Atom3d" >
              <element type="Element" >
               <code type="char" >2</code>
              </element>
              <formal_charge type="int" >0</formal_charge>
              <radius type="float" >0.23000000000000001</radius>
              <label type="string" >H29A</label>
              <site type="Handle" >
               <serial_number type="int" >392</serial_number>
               <value type="Site" >
                <orthogonal type="Point" >
                 <coordinates type="Vector" >
                  <vector type="Container" >
                   <count type="int" >3</count>
                   <item type="float" >2.8331520967923098</item>
                   <item type="float" >8.3427293599999999</item>
[truncated: 3,521,889 more chars]
