# Supplementary material for: Radicals organized by disk shaped aromatics – polymorphism and co-crystals that tune inter-electron exchange
Source: Royal Society of Chemistry journal article supplement (doi:10.1039/c1ce06096a), 2011-12-17
Supplement: c1ce06096a_3.mryx [file c1ce06096a_3.mryx › c1ce06096a_3.mryx.out]

<!DOCTYPE CCDC_XML>
<All>
 <graphics_crystal type="Container" >
  <count type="int" >1</count>
  <item type="Handle" >
   <serial_number type="int" >1</serial_number>
   <value type="GraphicsCrystal" >
    <graphics_crystal_memento type="GraphicsCrystalMemento" >
     <graphics_object type="GraphicsObject" >
      <color type="RGBA" >
       <red type="float" >1</red>
       <green type="float" >1</green>
       <blue type="float" >1</blue>
       <alpha type="float" >1</alpha>
      </color>
      <style type="GraphicsObject::RenderingStyle" >
       <enumerator type="int" >1</enumerator>
      </style>
      <label type="string" >pml020_0m</label>
      <options type="int" >851971</options>
     </graphics_object>
     <crystal type="Handle" >
      <serial_number type="int" >2</serial_number>
      <value type="CrystalStructureViewMemento" >
       <crystal_structure type="Handle" >
        <serial_number type="int" >3</serial_number>
        <value type="ConcreteCrystalStructure" >
         <cell type="Handle" >
          <serial_number type="int" >4</serial_number>
          <value type="Cell" >
           <a type="UncertainValue" >
            <value type="float" >9.8559999999999999</value>
            <uncertainty type="Uncertainty" >
             <precision type="int" >3</precision>
             <uncertainty type="int" >2</uncertainty>
            </uncertainty>
           </a>
           <b type="UncertainValue" >
            <value type="float" >7.2899000000000003</value>
            <uncertainty type="Uncertainty" >
             <precision type="int" >4</precision>
             <uncertainty type="int" >17</uncertainty>
            </uncertainty>
           </b>
           <c type="UncertainValue" >
            <value type="float" >25.018999999999998</value>
            <uncertainty type="Uncertainty" >
             <precision type="int" >3</precision>
             <uncertainty type="int" >6</uncertainty>
            </uncertainty>
           </c>
           <alpha type="UncertainValue" >
            <value type="float" >1.5707963267948966</value>
            <uncertainty type="Uncertainty" >
             <precision type="int" >2</precision>
             <uncertainty type="int" >0</uncertainty>
            </uncertainty>
           </alpha>
           <beta type="UncertainValue" >
            <value type="float" >1.6442746883038577</value>
            <uncertainty type="Uncertainty" >
             <precision type="int" >3</precision>
             <uncertainty type="int" >3</uncertainty>
            </uncertainty>
           </beta>
           <gamma type="UncertainValue" >
            <value type="float" >1.5707963267948966</value>
            <uncertainty type="Uncertainty" >
             <precision type="int" >2</precision>
             <uncertainty type="int" >0</uncertainty>
            </uncertainty>
           </gamma>
           <spacegroup type="Spacegroup" >
            <number type="int" >14</number>
            <name type="string" >P21/n</name>
            <setting type="int" >6</setting>
            <system type="Spacegroup::System" >
             <enumerator type="int" >0</enumerator>
            </system>
            <crystal_symmetry_operators type="Handle" >
             <serial_number type="int" >5</serial_number>
             <value type="Container" >
              <count type="int" >4</count>
              <item type="CrystalSymmetryOperator" >
               <rotation type="Matrix" >
                <matrix type="Vector" >
                 <vector type="Container" >
                  <count type="int" >9</count>
                  <item type="int" >1</item>
                  <item type="int" >0</item>
                  <item type="int" >0</item>
                  <item type="int" >0</item>
                  <item type="int" >1</item>
                  <item type="int" >0</item>
                  <item type="int" >0</item>
                  <item type="int" >0</item>
                  <item type="int" >1</item>
                 </vector>
                </matrix>
               </rotation>
               <translation type="Vector" >
                <vector type="Container" >
                 <count type="int" >3</count>
                 <item type="float" >0</item>
                 <item type="float" >0</item>
                 <item type="float" >0</item>
                </vector>
               </translation>
              </item>
              <item type="CrystalSymmetryOperator" >
               <rotation type="Matrix" >
                <matrix type="Vector" >
                 <vector type="Container" >
                  <count type="int" >9</count>
                  <item type="int" >-1</item>
                  <item type="int" >0</item>
                  <item type="int" >0</item>
                  <item type="int" >0</item>
                  <item type="int" >1</item>
                  <item type="int" >0</item>
                  <item type="int" >0</item>
                  <item type="int" >0</item>
                  <item type="int" >-1</item>
                 </vector>
                </matrix>
               </rotation>
               <translation type="Vector" >
                <vector type="Container" >
                 <count type="int" >3</count>
                 <item type="float" >0.5</item>
                 <item type="float" >0.5</item>
                 <item type="float" >0.5</item>
                </vector>
               </translation>
              </item>
              <item type="CrystalSymmetryOperator" >
               <rotation type="Matrix" >
                <matrix type="Vector" >
                 <vector type="Container" >
                  <count type="int" >9</count>
                  <item type="int" >-1</item>
                  <item type="int" >0</item>
                  <item type="int" >0</item>
                  <item type="int" >0</item>
                  <item type="int" >-1</item>
                  <item type="int" >0</item>
                  <item type="int" >0</item>
                  <item type="int" >0</item>
                  <item type="int" >-1</item>
                 </vector>
                </matrix>
               </rotation>
               <translation type="Vector" >
                <vector type="Container" >
                 <count type="int" >3</count>
                 <item type="float" >0</item>
                 <item type="float" >0</item>
                 <item type="float" >0</item>
                </vector>
               </translation>
              </item>
              <item type="CrystalSymmetryOperator" >
               <rotation type="Matrix" >
                <matrix type="Vector" >
                 <vector type="Container" >
                  <count type="int" >9</count>
                  <item type="int" >1</item>
                  <item type="int" >0</item>
                  <item type="int" >0</item>
                  <item type="int" >0</item>
                  <item type="int" >-1</item>
                  <item type="int" >0</item>
                  <item type="int" >0</item>
                  <item type="int" >0</item>
                  <item type="int" >1</item>
                 </vector>
                </matrix>
               </rotation>
               <translation type="Vector" >
                <vector type="Container" >
                 <count type="int" >3</count>
                 <item type="float" >0.5</item>
                 <item type="float" >0.5</item>
                 <item type="float" >0.5</item>
                </vector>
               </translation>
              </item>
             </value>
            </crystal_symmetry_operators>
           </spacegroup>
           <frac_to_orth type="Matrix" >
            <matrix type="Vector" >
             <vector type="Container" >
              <count type="int" >9</count>
              <item type="float" >9.8559999999999999</item>
              <item type="float" >4.4637763505521454e-16</item>
              <item type="float" >-1.8367013385522617</item>
              <item type="float" >0</item>
              <item type="float" >7.2899000000000003</item>
              <item type="float" >1.6444374341557658e-15</item>
              <item type="float" >0</item>
              <item type="float" >0</item>
              <item type="float" >24.951490720855944</item>
             </vector>
            </matrix>
           </frac_to_orth>
           <orth_to_frac type="Matrix" >
            <matrix type="Vector" >
             <vector type="Container" >
              <count type="int" >9</count>
              <item type="float" >0.10146103896103896</item>
              <item type="float" >-6.2126968300900646e-18</item>
              <item type="float" >0.0074686369706511357</item>
              <item type="float" >0</item>
              <item type="float" >0.13717609295052061</item>
              <item type="float" >-9.0406422943906831e-18</item>
              <item type="float" >0</item>
              <item type="float" >0</item>
              <item type="float" >0.040077765741032077</item>
             </vector>
            </matrix>
           </orth_to_frac>
           <valid type="bool" >true</valid>
          </value>
         </cell>
         <molecule type="Handle" >
          <serial_number type="int" >6</serial_number>
          <value type="Molecule3d" >
           <atoms type="Container" >
            <count type="int" >48</count>
            <item type="Handle" >
             <serial_number type="int" >7</serial_number>
             <value type="Atom3d" >
              <element type="Element" >
               <code type="char" >64</code>
              </element>
              <formal_charge type="int" >0</formal_charge>
              <radius type="float" >0.68000000000000005</radius>
              <label type="string" >O1</label>
              <site type="Handle" >
               <serial_number type="int" >8</serial_number>
               <value type="Site" >
                <orthogonal type="Point" >
                 <coordinates type="Vector" >
                  <vector type="Container" >
                   <count type="int" >3</count>
                   <item type="float" >-1.5459701377491097</item>
                   <item type="float" >6.6486803959999996</item>
                   <item type="float" >4.2826738673277136</item>
                  </vector>
                 </coordinates>
                </orthogonal>
                <fractional type="Point" >
                 <coordinates type="Vector" >
                  <vector type="Container" >
                   <count type="int" >3</count>
                   <item type="float" >-0.12486999999999999</item>
                   <item type="float" >0.91203999999999996</item>
                   <item type="float" >0.17163999999999999</item>
                  </vector>
                 </coordinates>
                </fractional>
                <uncertain_value type="UncertainValue" >
                 <value type="float" >1</value>
                 <uncertainty type="Uncertainty" >
                  <precision type="int" >0</precision>
                  <uncertainty type="int" >0</uncertainty>
                 </uncertainty>
                </uncertain_value>
                <uncertainty type="Handle" >
                 <serial_number type="int" >9</serial_number>
                 <value type="Container" >
                  <count type="int" >3</count>
                  <item type="Uncertainty" >
                   <precision type="int" >5</precision>
                   <uncertainty type="int" >8</uncertainty>
                  </item>
                  <item type="Uncertainty" >
                   <precision type="int" >5</precision>
                   <uncertainty type="int" >11</uncertainty>
                  </item>
                  <item type="Uncertainty" >
                   <precision type="int" >5</precision>
                   <uncertainty type="int" >3</uncertainty>
                  </item>
                 </value>
                </uncertainty>
                <adps type="Handle" >
                 <serial_number type="int" >10</serial_number>
                 <value type="AtomicDisplacementParameters" >
                  <uvalues type="Container" >
                   <count type="int" >6</count>
                   <item type="UncertainValue" >
                    <value type="float" >0.021499999999999998</value>
                    <uncertainty type="Uncertainty" >
                     <precision type="int" >4</precision>
                     <uncertainty type="int" >4</uncertainty>
                    </uncertainty>
                   </item>
                   <item type="UncertainValue" >
                    <value type="float" >0.024899999999999999</value>
                    <uncertainty type="Uncertainty" >
                     <precision type="int" >4</precision>
                     <uncertainty type="int" >4</uncertainty>
                    </uncertainty>
                   </item>
                   <item type="UncertainValue" >
                    <value type="float" >0.011599999999999999</value>
                    <uncertainty type="Uncertainty" >
                     <precision type="int" >4</precision>
                     <uncertainty type="int" >3</uncertainty>
                    </uncertainty>
                   </item>
                   <item type="UncertainValue" >
                    <value type="float" >0.0027000000000000001</value>
                    <uncertainty type="Uncertainty" >
                     <precision type="int" >4</precision>
                     <uncertainty type="int" >3</uncertainty>
                    </uncertainty>
                   </item>
                   <item type="UncertainValue" >
                    <value type="float" >0.0014</value>
                    <uncertainty type="Uncertainty" >
                     <precision type="int" >4</precision>
                     <uncertainty type="int" >3</uncertainty>
                    </uncertainty>
                   </item>
                   <item type="UncertainValue" >
                    <value type="float" >0.00050000000000000001</value>
                    <uncertainty type="Uncertainty" >
                     <precision type="int" >4</precision>
                     <uncertainty type="int" >3</uncertainty>
                    </uncertainty>
                   </item>
                  </uvalues>
                  <type type="AtomicDisplacementParameters::Type" >
                   <enumerator type="int" >0</enumerator>
                  </type>
                  <u_equivalent type="float" >0.019324228760767261</u_equivalent>
                 </value>
                </adps>
               </value>
              </site>
              <annotations type="Annotations" >
               <annotations type="Container" >
                <count type="int" >1</count>
                <item type="Handle" >
                 <serial_number type="int" >11</serial_number>
                 <value type="FileOrdering" >
                  <value type="Handle" >
                   <serial_number type="int" >12</serial_number>
                   <value type="FileOrdering" >
                    <file_order type="int" >0</file_order>
                   </value>
                  </value>
                 </value>
                </item>
               </annotations>
              </annotations>
             </value>
            </item>
            <item type="Handle" >
             <serial_number type="int" >13</serial_number>
             <value type="Atom3d" >
              <element type="Element" >
               <code type="char" >64</code>
              </element>
              <formal_charge type="int" >0</formal_charge>
              <radius type="float" >0.68000000000000005</radius>
              <label type="string" >O2</label>
              <site type="Handle" >
               <serial_number type="int" >14</serial_number>
               <value type="Site" >
                <orthogonal type="Point" >
                 <coordinates type="Vector" >
                  <vector type="Container" >
                   <count type="int" >3</count>
                   <item type="float" >-0.45308617746786456</item>
                   <item type="float" >5.7127301350000002</item>
                   <item type="float" >-0.121763274717777</item>
                  </vector>
                 </coordinates>
                </orthogonal>
                <fractional type="Point" >
                 <coordinates type="Vector" >
                  <vector type="Container" >
                   <count type="int" >3</count>
                   <item type="float" >-0.046879999999999998</item>
                   <item type="float" >0.78364999999999996</item>
                   <item type="float" >-0.0048799999999999998</item>
                  </vector>
                 </coordinates>
                </fractional>
                <uncertain_value type="UncertainValue" >
                 <value type="float" >1</value>
                 <uncertainty type="Uncertainty" >
                  <precision type="int" >0</precision>
                  <uncertainty type="int" >0</uncertainty>
                 </uncertainty>
                </uncertain_value>
                <uncertainty type="Handle" >
                 <serial_number type="int" >15</serial_number>
                 <value type="Container" >
                  <count type="int" >3</count>
                  <item type="Uncertainty" >
                   <precision type="int" >5</precision>
                   <uncertainty type="int" >7</uncertainty>
                  </item>
                  <item type="Uncertainty" >
                   <precision type="int" >5</precision>
                   <uncertainty type="int" >10</uncertainty>
                  </item>
                  <item type="Uncertainty" >
                   <precision type="int" >5</precision>
                   <uncertainty type="int" >3</uncertainty>
                  </item>
                 </value>
                </uncertainty>
                <adps type="Handle" >
                 <serial_number type="int" >16</serial_number>
                 <value type="AtomicDisplacementParameters" >
                  <uvalues type="Container" >
                   <count type="int" >6</count>
                   <item type="UncertainValue" >
                    <value type="float" >0.020199999999999999</value>
                    <uncertainty type="Uncertainty" >
                     <precision type="int" >4</precision>
                     <uncertainty type="int" >4</uncertainty>
                    </uncertainty>
                   </item>
                   <item type="UncertainValue" >
                    <value type="float" >0.0229</value>
                    <uncertainty type="Uncertainty" >
                     <precision type="int" >4</precision>
                     <uncertainty type="int" >4</uncertainty>
                    </uncertainty>
                   </item>
                   <item type="UncertainValue" >
                    <value type="float" >0.014800000000000001</value>
                    <uncertainty type="Uncertainty" >
                     <precision type="int" >4</precision>
                     <uncertainty type="int" >3</uncertainty>
                    </uncertainty>
                   </item>
                   <item type="UncertainValue" >
                    <value type="float" >0.0014</value>
                    <uncertainty type="Uncertainty" >
                     <precision type="int" >4</precision>
                     <uncertainty type="int" >3</uncertainty>
                    </uncertainty>
                   </item>
                   <item type="UncertainValue" >
                    <value type="float" >0.0044999999999999997</value>
                    <uncertainty type="Uncertainty" >
                     <precision type="int" >4</precision>
                     <uncertainty type="int" >3</uncertainty>
                    </uncertainty>
                   </item>
                   <item type="UncertainValue" >
                    <value type="float" >-0.0043</value>
                    <uncertainty type="Uncertainty" >
                     <precision type="int" >4</precision>
                     <uncertainty type="int" >3</uncertainty>
                    </uncertainty>
                   </item>
                  </uvalues>
                  <type type="AtomicDisplacementParameters::Type" >
                   <enumerator type="int" >0</enumerator>
                  </type>
                  <u_equivalent type="float" >0.019141786415468671</u_equivalent>
                 </value>
                </adps>
               </value>
              </site>
              <annotations type="Annotations" >
               <annotations type="Container" >
                <count type="int" >1</count>
                <item type="Handle" >
                 <serial_number type="int" >17</serial_number>
                 <value type="FileOrdering" >
                  <value type="Handle" >
                   <serial_number type="int" >18</serial_number>
                   <value type="FileOrdering" >
                    <file_order type="int" >1</file_order>
                   </value>
                  </value>
                 </value>
                </item>
               </annotations>
              </annotations>
             </value>
            </item>
            <item type="Handle" >
             <serial_number type="int" >19</serial_number>
             <value type="Atom3d" >
              <element type="Element" >
               <code type="char" >56</code>
              </element>
              <formal_charge type="int" >0</formal_charge>
              <radius type="float" >0.68000000000000005</radius>
              <label type="string" >N1</label>
              <site type="Handle" >
               <serial_number type="int" >20</serial_number>
               <value type="Site" >
                <orthogonal type="Point" >
                 <coordinates type="Vector" >
                  <vector type="Container" >
                   <count type="int" >3</count>
                   <item type="float" >-1.5720940362286195</item>
                   <item type="float" >6.6147094619999995</item>
                   <item type="float" >3.0054070573270986</item>
                  </vector>
                 </coordinates>
                </orthogonal>
                <fractional type="Point" >
                 <coordinates type="Vector" >
                  <vector type="Container" >
                   <count type="int" >3</count>
                   <item type="float" >-0.13705999999999999</item>
                   <item type="float" >0.90737999999999996</item>
                   <item type="float" >0.12045</item>
                  </vector>
                 </coordinates>
                </fractional>
                <uncertain_value type="UncertainValue" >
                 <value type="float" >1</value>
                 <uncertainty type="Uncertainty" >
                  <precision type="int" >0</precision>
                  <uncertainty type="int" >0</uncertainty>
                 </uncertainty>
                </uncertain_value>
                <uncertainty type="Handle" >
                 <serial_number type="int" >21</serial_number>
                 <value type="Container" >
                  <count type="int" >3</count>
                  <item type="Uncertainty" >
                   <precision type="int" >5</precision>
                   <uncertainty type="int" >8</uncertainty>
                  </item>
                  <item type="Uncertainty" >
                   <precision type="int" >5</precision>
                   <uncertainty type="int" >11</uncertainty>
                  </item>
                  <item type="Uncertainty" >
                   <precision type="int" >5</precision>
                   <uncertainty type="int" >3</uncertainty>
                  </item>
                 </value>
                </uncertainty>
                <adps type="Handle" >
                 <serial_number type="int" >22</serial_number>
                 <value type="AtomicDisplacementParameters" >
                  <uvalues type="Container" >
                   <count type="int" >6</count>
                   <item type="UncertainValue" >
                    <value type="float" >0.014500000000000001</value>
                    <uncertainty type="Uncertainty" >
                     <precision type="int" >4</precision>
                     <uncertainty type="int" >4</uncertainty>
                    </uncertainty>
                   </item>
                   <item type="UncertainValue" >
                    <value type="float" >0.016799999999999999</value>
                    <uncertainty type="Uncertainty" >
                     <precision type="int" >4</precision>
                     <uncertainty type="int" >4</uncertainty>
                    </uncertainty>
                   </item>
                   <item type="UncertainValue" >
                    <value type="float" >0.0137</value>
                    <uncertainty type="Uncertainty" >
                     <precision type="int" >4</precision>
                     <uncertainty type="int" >4</uncertainty>
                    </uncertainty>
                   </item>
                   <item type="UncertainValue" >
                    <value type="float" >0.00080000000000000004</value>
                    <uncertainty type="Uncertainty" >
                     <precision type="int" >4</precision>
                     <uncertainty type="int" >3</uncertainty>
                    </uncertainty>
                   </item>
                   <item type="UncertainValue" >
                    <value type="float" >0.00050000000000000001</value>
                    <uncertainty type="Uncertainty" >
                     <precision type="int" >4</precision>
                     <uncertainty type="int" >3</uncertainty>
                    </uncertainty>
                   </item>
                   <item type="UncertainValue" >
                    <value type="float" >0.00040000000000000002</value>
                    <uncertainty type="Uncertainty" >
                     <precision type="int" >4</precision>
                     <uncertainty type="int" >3</uncertainty>
                    </uncertainty>
                   </item>
                  </uvalues>
                  <type type="AtomicDisplacementParameters::Type" >
                   <enumerator type="int" >0</enumerator>
                  </type>
                  <u_equivalent type="float" >0.01502633113811481</u_equivalent>
                 </value>
                </adps>
               </value>
              </site>
              <annotations type="Annotations" >
               <annotations type="Container" >
                <count type="int" >1</count>
                <item type="Handle" >
                 <serial_number type="int" >23</serial_number>
                 <value type="FileOrdering" >
                  <value type="Handle" >
                   <serial_number type="int" >24</serial_number>
                   <value type="FileOrdering" >
                    <file_order type="int" >2</file_order>
                   </value>
                  </value>
                 </value>
                </item>
               </annotations>
              </annotations>
             </value>
            </item>
            <item type="Handle" >
             <serial_number type="int" >25</serial_number>
             <value type="Atom3d" >
              <element type="Element" >
               <code type="char" >56</code>
              </element>
              <formal_charge type="int" >0</formal_charge>
              <radius type="float" >0.68000000000000005</radius>
              <label type="string" >N2</label>
              <site type="Handle" >
               <serial_number type="int" >26</serial_number>
               <value type="Site" >
                <orthogonal type="Point" >
                 <coordinates type="Vector" >
                  <vector type="Container" >
                   <count type="int" >3</count>
                   <item type="float" >-1.0727673152319517</item>
                   <item type="float" >6.1255571720000006</item>
                   <item type="float" >0.91771582871308166</item>
                  </vector>
                 </coordinates>
                </orthogonal>
                <fractional type="Point" >
                 <coordinates type="Vector" >
                  <vector type="Container" >
                   <count type="int" >3</count>
                   <item type="float" >-0.10199</item>
                   <item type="float" >0.84028000000000003</item>
                   <item type="float" >0.03678</item>
                  </vector>
                 </coordinates>
                </fractional>
                <uncertain_value type="UncertainValue" >
                 <value type="float" >1</value>
                 <uncertainty type="Uncertainty" >
                  <precision type="int" >0</precision>
                  <uncertainty type="int" >0</uncertainty>
                 </uncertainty>
                </uncertain_value>
                <uncertainty type="Handle" >
                 <serial_number type="int" >27</serial_number>
                 <value type="Container" >
                  <count type="int" >3</count>
                  <item type="Uncertainty" >
                   <precision type="int" >5</precision>
                   <uncertainty type="int" >8</uncertainty>
                  </item>
                  <item type="Uncertainty" >
                   <precision type="int" >5</precision>
                   <uncertainty type="int" >12</uncertainty>
                  </item>
                  <item type="Uncertainty" >
                   <precision type="int" >5</precision>
                   <uncertainty type="int" >3</uncertainty>
                  </item>
                 </value>
                </uncertainty>
                <adps type="Handle" >
                 <serial_number type="int" >28</serial_number>
                 <value type="AtomicDisplacementParameters" >
                  <uvalues type="Container" >
                   <count type="int" >6</count>
                   <item type="UncertainValue" >
                    <value type="float" >0.0144</value>
                    <uncertainty type="Uncertainty" >
                     <precision type="int" >4</precision>
                     <uncertainty type="int" >4</uncertainty>
                    </uncertainty>
                   </item>
                   <item type="UncertainValue" >
                    <value type="float" >0.016500000000000001</value>
                    <uncertainty type="Uncertainty" >
                     <precision type="int" >4</precision>
                     <uncertainty type="int" >4</uncertainty>
                    </uncertainty>
                   </item>
                   <item type="UncertainValue" >
                    <value type="float" >0.0144</value>
                    <uncertainty type="Uncertainty" >
                     <precision type="int" >4</precision>
                     <uncertainty type="int" >4</uncertainty>
                    </uncertainty>
                   </item>
                   <item type="UncertainValue" >
                    <value type="float" >0.0001</value>
                    <uncertainty type="Uncertainty" >
                     <precision type="int" >4</precision>
                     <uncertainty type="int" >3</uncertainty>
                    </uncertainty>
                   </item>
                   <item type="UncertainValue" >
                    <value type="float" >0.0015</value>
                    <uncertainty type="Uncertainty" >
                     <precision type="int" >4</precision>
                     <uncertainty type="int" >3</uncertainty>
                    </uncertainty>
                   </item>
                   <item type="UncertainValue" >
                    <value type="float" >-0.0011000000000000001</value>
                    <uncertainty type="Uncertainty" >
                     <precision type="int" >4</precision>
                     <uncertainty type="int" >3</uncertainty>
                    </uncertainty>
                   </item>
                  </uvalues>
                  <type type="AtomicDisplacementParameters::Type" >
                   <enumerator type="int" >0</enumerator>
                  </type>
                  <u_equivalent type="float" >0.015078208151190381</u_equivalent>
                 </value>
                </adps>
               </value>
              </site>
              <annotations type="Annotations" >
               <annotations type="Container" >
                <count type="int" >1</count>
                <item type="Handle" >
                 <serial_number type="int" >29</serial_number>
                 <value type="FileOrdering" >
                  <value type="Handle" >
                   <serial_number type="int" >30</serial_number>
                   <value type="FileOrdering" >
                    <file_order type="int" >3</file_order>
                   </value>
                  </value>
                 </value>
                </item>
               </annotations>
              </annotations>
             </value>
            </item>
            <item type="Handle" >
             <serial_number type="int" >31</serial_number>
             <value type="Atom3d" >
              <element type="Element" >
               <code type="char" >1</code>
              </element>
              <formal_charge type="int" >0</formal_charge>
              <radius type="float" >0.68000000000000005</radius>
              <label type="string" >C1</label>
              <site type="Handle" >
               <serial_number type="int" >32</serial_number>
               <value type="Site" >
                <orthogonal type="Point" >
                 <coordinates type="Vector" >
                  <vector type="Container" >
                   <count type="int" >3</count>
                   <item type="float" >-0.62363062168551453</item>
                   <item type="float" >6.0901282580000009</item>
                   <item type="float" >2.1937350641776545</item>
                  </vector>
                 </coordinates>
                </orthogonal>
                <fractional type="Point" >
                 <coordinates type="Vector" >
                  <vector type="Container" >
                   <count type="int" >3</count>
                   <item type="float" >-0.046890000000000001</item>
                   <item type="float" >0.83542000000000005</item>
                   <item type="float" >0.087919999999999998</item>
                  </vector>
                 </coordinates>
                </fractional>
                <uncertain_value type="UncertainValue" >
                 <value type="float" >1</value>
                 <uncertainty type="Uncertainty" >
                  <precision type="int" >0</precision>
                  <uncertainty type="int" >0</uncertainty>
                 </uncertainty>
                </uncertain_value>
                <uncertainty type="Handle" >
                 <serial_number type="int" >33</serial_number>
                 <value type="Container" >
                  <count type="int" >3</count>
                  <item type="Uncertainty" >
                   <precision type="int" >5</precision>
                   <uncertainty type="int" >10</uncertainty>
                  </item>
                  <item type="Uncertainty" >
                   <precision type="int" >5</precision>
                   <uncertainty type="int" >13</uncertainty>
                  </item>
                  <item type="Uncertainty" >
                   <precision type="int" >5</precision>
                   <uncertainty type="int" >4</uncertainty>
                  </item>
                 </value>
                </uncertainty>
                <adps type="Handle" >
                 <serial_number type="int" >34</serial_number>
                 <value type="AtomicDisplacementParameters" >
                  <uvalues type="Container" >
                   <count type="int" >6</count>
                   <item type="UncertainValue" >
                    <value type="float" >0.015100000000000001</value>
                    <uncertainty type="Uncertainty" >
                     <precision type="int" >4</precision>
                     <uncertainty type="int" >4</uncertainty>
                    </uncertainty>
                   </item>
                   <item type="UncertainValue" >
                    <value type="float" >0.014500000000000001</value>
                    <uncertainty type="Uncertainty" >
                     <precision type="int" >4</precision>
                     <uncertainty type="int" >4</uncertainty>
                    </uncertainty>
                   </item>
                   <item type="UncertainValue" >
                    <value type="float" >0.014500000000000001</value>
                    <uncertainty type="Uncertainty" >
                     <precision type="int" >4</precision>
                     <uncertainty type="int" >4</uncertainty>
                    </uncertainty>
                   </item>
                   <item type="UncertainValue" >
                    <value type="float" >-0.00020000000000000001</value>
                    <uncertainty type="Uncertainty" >
                     <precision type="int" >4</precision>
                     <uncertainty type="int" >3</uncertainty>
                    </uncertainty>
                   </item>
                   <item type="UncertainValue" >
                    <value type="float" >0.001</value>
                    <uncertainty type="Uncertainty" >
                     <precision type="int" >4</precision>
                     <uncertainty type="int" >3</uncertainty>
                    </uncertainty>
                   </item>
                   <item type="UncertainValue" >
                    <value type="float" >-0.00020000000000000001</value>
                    <uncertainty type="Uncertainty" >
                     <precision type="int" >4</precision>
                     <uncertainty type="int" >3</uncertainty>
                    </uncertainty>
                   </item>
                  </uvalues>
                  <type type="AtomicDisplacementParameters::Type" >
                   <enumerator type="int" >0</enumerator>
                  </type>
                  <u_equivalent type="float" >0.01470425645091549</u_equivalent>
                 </value>
                </adps>
               </value>
              </site>
              <annotations type="Annotations" >
               <annotations type="Container" >
                <count type="int" >1</count>
                <item type="Handle" >
                 <serial_number type="int" >35</serial_number>
                 <value type="FileOrdering" >
                  <value type="Handle" >
                   <serial_number type="int" >36</serial_number>
                   <value type="FileOrdering" >
                    <file_order type="int" >4</file_order>
                   </value>
                  </value>
                 </value>
                </item>
               </annotations>
              </annotations>
             </value>
            </item>
            <item type="Handle" >
             <serial_number type="int" >37</serial_number>
             <value type="Atom3d" >
              <element type="Element" >
               <code type="char" >1</code>
              </element>
              <formal_charge type="int" >0</formal_charge>
              <radius type="float" >0.68000000000000005</radius>
              <label type="string" >C2</label>
              <site type="Handle" >
               <serial_number type="int" >38</serial_number>
               <value type="Site" >
                <orthogonal type="Point" >
                 <coordinates type="Vector" >
                  <vector type="Container" >
                   <count type="int" >3</count>
                   <item type="float" >-2.6513784635288027</item>
                   <item type="float" >7.2978459910000009</item>
                   <item type="float" >2.2094545033317941</item>
                  </vector>
                 </coordinates>
                </orthogonal>
                <fractional type="Point" >
                 <coordinates type="Vector" >
                  <vector type="Container" >
                   <count type="int" >3</count>
                   <item type="float" >-0.25251000000000001</item>
                   <item type="float" >1.00109</item>
                   <item type="float" >0.088550000000000004</item>
                  </vector>
                 </coordinates>
                </fractional>
                <uncertain_value type="UncertainValue" >
                 <value type="float" >1</value>
                 <uncertainty type="Uncertainty" >
                  <precision type="int" >0</precision>
                  <uncertainty type="int" >0</uncertainty>
                 </uncertainty>
                </uncertain_value>
                <uncertainty type="Handle" >
                 <serial_number type="int" >39</serial_number>
                 <value type="Container" >
                  <count type="int" >3</count>
                  <item type="Uncertainty" >
                   <precision type="int" >5</precision>
                   <uncertainty type="int" >10</uncertainty>
                  </item>
                  <item type="Uncertainty" >
                   <precision type="int" >5</precision>
                   <uncertainty type="int" >13</uncertainty>
                  </item>
                  <item type="Uncertainty" >
                   <precision type="int" >5</precision>
                   <uncertainty type="int" >4</uncertainty>
                  </item>
                 </value>
                </uncertainty>
                <adps type="Handle" >
                 <serial_number type="int" >40</serial_number>
                 <value type="AtomicDisplacementParameters" >
                  <uvalues type="Container" >
                   <count type="int" >6</count>
                   <item type="UncertainValue" >
                    <value type="float" >0.014500000000000001</value>
                    <uncertainty type="Uncertainty" >
                     <precision type="int" >4</precision>
                     <uncertainty type="int" >4</uncertainty>
                    </uncertainty>
                   </item>
                   <item type="UncertainValue" >
                    <value type="float" >0.016400000000000001</value>
                    <uncertainty type="Uncertainty" >
                     <precision type="int" >4</precision>
                     <uncertainty type="int" >4</uncertainty>
                    </uncertainty>
                   </item>
                   <item type="UncertainValue" >
                    <value type="float" >0.0138</value>
                    <uncertainty type="Uncertainty" >
                     <precision type="int" >4</precision>
                     <uncertainty type="int" >4</uncertainty>
                    </uncertainty>
                   </item>
                   <item type="UncertainValue" >
                    <value type="float" >0.0019</value>
                    <uncertainty type="Uncertainty" >
                     <precision type="int" >4</precision>
                     <uncertainty type="int" >3</uncertainty>
                    </uncertainty>
                   </item>
                   <item type="UncertainValue" >
                    <value type="float" >0.00080000000000000004</value>
                    <uncertainty type="Uncertainty" >
                     <precision type="int" >4</precision>
                     <uncertainty type="int" >3</uncertainty>
                    </uncertainty>
                   </item>
                   <item type="UncertainValue" >
                    <value type="float" >0.00080000000000000004</value>
                    <uncertainty type="Uncertainty" >
                     <precision type="int" >4</precision>
                     <uncertainty type="int" >3</uncertainty>
                    </uncertainty>
                   </item>
                  </uvalues>
                  <type type="AtomicDisplacementParameters::Type" >
                   <enumerator type="int" >0</enumerator>
                  </type>
                  <u_equivalent type="float" >0.014911749747036544</u_equivalent>
                 </value>
                </adps>
               </value>
              </site>
              <annotations type="Annotations" >
               <annotations type="Container" >
                <count type="int" >1</count>
                <item type="Handle" >
                 <serial_number type="int" >41</serial_number>
                 <value type="FileOrdering" >
                  <value type="Handle" >
                   <serial_number type="int" >42</serial_number>
                   <value type="FileOrdering" >
                    <file_order type="int" >5</file_order>
                   </value>
                  </value>
                 </value>
                </item>
               </annotations>
              </annotations>
             </value>
            </item>
            <item type="Handle" >
             <serial_number type="int" >43</serial_number>
             <value type="Atom3d" >
              <element type="Element" >
               <code type="char" >1</code>
              </element>
              <formal_charge type="int" >0</formal_charge>
              <radius type="float" >0.68000000000000005</radius>
              <label type="string" >C3</label>
              <site type="Handle" >
               <serial_number type="int" >44</serial_number>
               <value type="Site" >
                <orthogonal type="Point" >
                 <coordinates type="Vector" >
                  <vector type="Container" >
                   <count type="int" >3</count>
                   <item type="float" >-2.5188949533272931</item>
                   <item type="float" >6.532698087</item>
                   <item type="float" >0.86357109384882424</item>
                  </vector>
                 </coordinates>
                </orthogonal>
                <fractional type="Point" >
                 <coordinates type="Vector" >
                  <vector type="Container" >
                   <count type="int" >3</count>
                   <item type="float" >-0.24912000000000001</item>
                   <item type="float" >0.89612999999999998</item>
                   <item type="float" >0.034610000000000002</item>
                  </vector>
                 </coordinates>
                </fractional>
                <uncertain_value type="UncertainValue" >
                 <value type="float" >1</value>
                 <uncertainty type="Uncertainty" >
                  <precision type="int" >0</precision>
                  <uncertainty type="int" >0</uncertainty>
                 </uncertainty>
                </uncertain_value>
                <uncertainty type="Handle" >
                 <serial_number type="int" >45</serial_number>
                 <value type="Container" >
                  <count type="int" >3</count>
                  <item type="Uncertainty" >
                   <precision type="int" >5</precision>
                   <uncertainty type="int" >10</uncertainty>
                  </item>
                  <item type="Uncertainty" >
                   <precision type="int" >5</precision>
                   <uncertainty type="int" >13</uncertainty>
                  </item>
                  <item type="Uncertainty" >
                   <precision type="int" >5</precision>
                   <uncertainty type="int" >4</uncertainty>
                  </item>
                 </value>
                </uncertainty>
                <adps type="Handle" >
                 <serial_number type="int" >46</serial_number>
                 <value type="AtomicDisplacementParameters" >
                  <uvalues type="Container" >
                   <count type="int" >6</count>
                   <item type="UncertainValue" >
                    <value type="float" >0.012699999999999999</value>
                    <uncertainty type="Uncertainty" >
                     <precision type="int" >4</precision>
                     <uncertainty type="int" >4</uncertainty>
                    </uncertainty>
                   </item>
                   <item type="UncertainValue" >
                    <value type="float" >0.017100000000000001</value>
                    <uncertainty type="Uncertainty" >
                     <precision type="int" >4</precision>
                     <uncertainty type="int" >4</uncertainty>
                    </uncertainty>
                   </item>
                   <item type="UncertainValue" >
                    <value type="float" >0.015100000000000001</value>
                    <uncertainty type="Uncertainty" >
                     <precision type="int" >4</precision>
                     <uncertainty type="int" >4</uncertainty>
                    </uncertainty>
                   </item>
                   <item type="UncertainValue" >
                    <value type="float" >0.00089999999999999998</value>
                    <uncertainty type="Uncertainty" >
                     <precision type="int" >4</precision>
                     <uncertainty type="int" >3</uncertainty>
                    </uncertainty>
                   </item>
                   <item type="UncertainValue" >
                    <value type="float" >0.00059999999999999995</value>
                    <uncertainty type="Uncertainty" >
                     <precision type="int" >4</precision>
                     <uncertainty type="int" >3</uncertainty>
                    </uncertainty>
                   </item>
                   <item type="UncertainValue" >
                    <value type="float" >-0.0001</value>
                    <uncertainty type="Uncertainty" >
                     <precision type="int" >4</precision>
                     <uncertainty type="int" >3</uncertainty>
                    </uncertainty>
                   </item>
                  </uvalues>
                  <type type="AtomicDisplacementParameters::Type" >
                   <enumerator type="int" >0</enumerator>
                  </type>
                  <u_equivalent type="float" >0.014987354659833642</u_equivalent>
                 </value>
                </adps>
               </value>
              </site>
              <annotations type="Annotations" >
               <annotations type="Container" >
                <count type="int" >1</count>
                <item type="Handle" >
                 <serial_number type="int" >47</serial_number>
                 <value type="FileOrdering" >
                  <value type="Handle" >
                   <serial_number type="int" >48</serial_number>
                   <value type="FileOrdering" >
                    <file_order type="int" >6</file_order>
                   </value>
                  </value>
                 </value>
                </item>
               </annotations>
              </annotations>
             </value>
            </item>
            <item type="Handle" >
             <serial_number type="int" >49</serial_number>
             <value type="Atom3d" >
              <element type="Element" >
               <code type="char" >1</code>
              </element>
              <formal_charge type="int" >0</formal_charge>
              <radius type="float" >0.68000000000000005</radius>
              <label type="string" >C4</label>
              <site type="Handle" >
               <serial_number type="int" >50</serial_number>
               <value type="Site" >
                <orthogonal type="Point" >
                 <coordinates type="Vector" >
                  <vector type="Container" >
                   <count type="int" >3</count>
                   <item type="float" >-3.9856092615436864</item>
                   <item type="float" >7.1394364640000001</item>
                   <item type="float" >2.9180768398041024</item>
                  </vector>
                 </coordinates>
                </orthogonal>
                <fractional type="Point" >
                 <coordinates type="Vector" >
                  <vector type="Container" >
                   <count type="int" >3</count>
                   <item type="float" >-0.38258999999999999</item>
                   <item type="float" >0.97936000000000001</item>
                   <item type="float" >0.11695</item>
                  </vector>
                 </coordinates>
                </fractional>
                <uncertain_value type="UncertainValue" >
                 <value type="float" >1</value>
                 <uncertainty type="Uncertainty" >
                  <precision type="int" >0</precision>
                  <uncertainty type="int" >0</uncertainty>
                 </uncertainty>
                </uncertain_value>
                <uncertainty type="Handle" >
                 <serial_number type="int" >51</serial_number>
                 <value type="Container" >
                  <count type="int" >3</count>
                  <item type="Uncertainty" >
                   <precision type="int" >5</precision>
                   <uncertainty type="int" >10</uncertainty>
                  </item>
                  <item type="Uncertainty" >
                   <precision type="int" >5</precision>
                   <uncertainty type="int" >15</uncertainty>
                  </item>
                  <item type="Uncertainty" >
                   <precision type="int" >5</precision>
                   <uncertainty type="int" >4</uncertainty>
                  </item>
                 </value>
                </uncertainty>
                <adps type="Handle" >
                 <serial_number type="int" >52</serial_number>
                 <value type="AtomicDisplacementParameters" >
                  <uvalues type="Container" >
                   <count type="int" >6</count>
                   <item type="UncertainValue" >
                    <value type="float" >0.015299999999999999</value>
                    <uncertainty type="Uncertainty" >
                     <precision type="int" >4</precision>
                     <uncertainty type="int" >5</uncertainty>
                    </uncertainty>
                   </item>
                   <item type="UncertainValue" >
                    <value type="float" >0.026800000000000001</value>
                    <uncertainty type="Uncertainty" >
                     <precision type="int" >4</precision>
                     <uncertainty type="int" >5</uncertainty>
                    </uncertainty>
                   </item>
                   <item type="UncertainValue" >
                    <value type="float" >0.018800000000000001</value>
                    <uncertainty type="Uncertainty" >
                     <precision type="int" >4</precision>
                     <uncertainty type="int" >5</uncertainty>
                    </uncertainty>
                   </item>
                   <item type="UncertainValue" >
                    <value type="float" >0.002</value>
                    <uncertainty type="Uncertainty" >
                     <precision type="int" >4</precision>
                     <uncertainty type="int" >4</uncertainty>
                    </uncertainty>
                   </item>
                   <item type="UncertainValue" >
                    <value type="float" >0.0040000000000000001</value>
                    <uncertainty type="Uncertainty" >
                     <precision type="int" >4</precision>
                     <uncertainty type="int" >3</uncertainty>
                    </uncertainty>
                   </item>
                   <item type="UncertainValue" >
                    <value type="float" >0.001</value>
                    <uncertainty type="Uncertainty" >
                     <precision type="int" >4</precision>
                     <uncertainty type="int" >4</uncertainty>
                    </uncertainty>
                   </item>
                  </uvalues>
                  <type type="AtomicDisplacementParameters::Type" >
                   <enumerator type="int" >0</enumerator>
                  </type>
                  <u_equivalent type="float" >0.020164764196423848</u_equivalent>
                 </value>
                </adps>
               </value>
              </site>
              <annotations type="Annotations" >
               <annotations type="Container" >
                <count type="int" >1</count>
                <item type="Handle" >
                 <serial_number type="int" >53</serial_number>
                 <value type="FileOrdering" >
                  <value type="Handle" >
                   <serial_number type="int" >54</serial_number>
                   <value type="FileOrdering" >
                    <file_order type="int" >7</file_order>
                   </value>
                  </value>
                 </value>
                </item>
               </annotations>
              </annotations>
             </value>
            </item>
            <item type="Handle" >
             <serial_number type="int" >55</serial_number>
             <value type="Atom3d" >
              <element type="Element" >
               <code type="char" >2</code>
              </element>
              <formal_charge type="int" >0</formal_charge>
              <radius type="float" >0.23000000000000001</radius>
              <label type="string" >H4A</label>
              <site type="Handle" >
               <serial_number type="int" >56</serial_number>
               <value type="Site" >
                <orthogonal type="Point" >
                 <coordinates type="Vector" >
                  <vector type="Container" >
                   <count type="int" >3</count>
                   <item type="float" >-4.1757153035710859</item>
                   <item type="float" >6.1869381300000006</item>
                   <item type="float" >3.0490721660885964</item>
                  </vector>
                 </coordinates>
                </orthogonal>
                <fractional type="Point" >
                 <coordinates type="Vector" >
                  <vector type="Container" >
                   <count type="int" >3</count>
                   <item type="float" >-0.40089999999999998</item>
                   <item type="float" >0.84870000000000001</item>
                   <item type="float" >0.1222</item>
                  </vector>
                 </coordinates>
                </fractional>
                <uncertain_value type="UncertainValue" >
                 <value type="float" >1</value>
                 <uncertainty type="Uncertainty" >
                  <precision type="int" >0</precision>
                  <uncertainty type="int" >0</uncertainty>
                 </uncertainty>
                </uncertain_value>
                <uncertainty type="Handle" >
                 <serial_number type="int" >57</serial_number>
                 <value type="Container" >
                  <count type="int" >3</count>
                  <item type="Uncertainty" >
                   <precision type="int" >4</precision>
                   <uncertainty type="int" >0</uncertainty>
                  </item>
                  <item type="Uncertainty" >
                   <precision type="int" >4</precision>
                   <uncertainty type="int" >0</uncertainty>
                  </item>
                  <item type="Uncertainty" >
                   <precision type="int" >4</precision>
                   <uncertainty type="int" >0</uncertainty>
                  </item>
                 </value>
                </uncertainty>
                <adps type="Handle" >
                 <serial_number type="int" >58</serial_number>
                 <value type="AtomicDisplacementParameters" >
                  <uvalues type="Container" >
                   <count type="int" >6</count>
                   <item type="UncertainValue" >
                    <value type="float" >0.029999999999999999</value>
                    <uncertainty type="Uncertainty" >
                     <precision type="int" >1000000</precision>
                     <uncertainty type="int" >0</uncertainty>
                    </uncertainty>
                   </item>
                   <item type="UncertainValue" >
                    <value type="float" >0.030000000000000006</value>
                    <uncertainty type="Uncertainty" >
                     <precision type="int" >1000000</precision>
                     <uncertainty type="int" >0</uncertainty>
                    </uncertainty>
                   </item>
                   <item type="UncertainValue" >
                    <value type="float" >0.030000000000000006</value>
                    <uncertainty type="Uncertainty" >
                     <precision type="int" >1000000</precision>
                     <uncertainty type="int" >0</uncertainty>
                    </uncertainty>
                   </item>
                   <item type="UncertainValue" >
                    <value type="float" >-1.9771613478563597e-18</value>
                    <uncertainty type="Uncertainty" >
                     <precision type="int" >1000000</precision>
                     <uncertainty type="int" >0</uncertainty>
                    </uncertainty>
                   </item>
                   <item type="UncertainValue" >
                    <value type="float" >0.0022023678067296</value>
                    <uncertainty type="Uncertainty" >
                     <precision type="int" >1000000</precision>
                     <uncertainty type="int" >0</uncertainty>
                    </uncertainty>
                   </item>
                   <item type="UncertainValue" >
                    <value type="float" >-1.9771613478563593e-18</value>
                    <uncertainty type="Uncertainty" >
                     <precision type="int" >1000000</precision>
                     <uncertainty type="int" >0</uncertainty>
                    </uncertainty>
                   </item>
                  </uvalues>
                  <type type="AtomicDisplacementParameters::Type" >
                   <enumerator type="int" >1</enumerator>
                  </type>
                  <u_equivalent type="float" >0.029999999999999999</u_equivalent>
                 </value>
                </adps>
               </value>
              </site>
              <annotations type="Annotations" >
               <annotations type="Container" >
                <count type="int" >1</count>
                <item type="Handle" >
                 <serial_number type="int" >59</serial_number>
                 <value type="FileOrdering" >
                  <value type="Handle" >
                   <serial_number type="int" >60</serial_number>
                   <value type="FileOrdering" >
                    <file_order type="int" >8</file_order>
                   </value>
                  </value>
                 </value>
                </item>
               </annotations>
              </annotations>
             </value>
            </item>
            <item type="Handle" >
             <serial_number type="int" >61</serial_number>
             <value type="Atom3d" >
              <element type="Element" >
               <code type="char" >2</code>
              </element>
              <formal_charge type="int" >0</formal_charge>
              <radius type="float" >0.23000000000000001</radius>
              <label type="string" >H4B</label>
              <site type="Handle" >
               <serial_number type="int" >62</serial_number>
               <value type="Site" >
                <orthogonal type="Point" >
                 <coordinates type="Vector" >
                  <vector type="Container" >
                   <count type="int" >3</count>
                   <item type="float" >-4.6938299674301751</item>
                   <item type="float" >7.5428595300000003</item>
                   <item type="float" >2.3753819166254861</item>
                  </vector>
                 </coordinates>
                </orthogonal>
                <fractional type="Point" >
                 <coordinates type="Vector" >
                  <vector type="Container" >
                   <count type="int" >3</count>
                   <item type="float" >-0.45850000000000002</item>
                   <item type="float" >1.0347</item>
                   <item type="float" >0.095200000000000007</item>
                  </vector>
                 </coordinates>
                </fractional>
                <uncertain_value type="UncertainValue" >
                 <value type="float" >1</value>
                 <uncertainty type="Uncertainty" >
                  <precision type="int" >0</precision>
                  <uncertainty type="int" >0</uncertainty>
                 </uncertainty>
                </uncertain_value>
                <uncertainty type="Handle" >
                 <serial_number type="int" >63</serial_number>
                 <value type="Container" >
                  <count type="int" >3</count>
                  <item type="Uncertainty" >
                   <precision type="int" >4</precision>
                   <uncertainty type="int" >0</uncertainty>
                  </item>
                  <item type="Uncertainty" >
                   <precision type="int" >4</precision>
                   <uncertainty type="int" >0</uncertainty>
                  </item>
                  <item type="Uncertainty" >
                   <precision type="int" >4</precision>
                   <uncertainty type="int" >0</uncertainty>
                  </item>
                 </value>
                </uncertainty>
                <adps type="Handle" >
                 <serial_number type="int" >64</serial_number>
                 <value type="AtomicDisplacementParameters" >
                  <uvalues type="Container" >
                   <count type="int" >6</count>
                   <item type="UncertainValue" >
                    <value type="float" >0.029999999999999999</value>
                    <uncertainty type="Uncertainty" >
                     <precision type="int" >1000000</precision>
                     <uncertainty type="int" >0</uncertainty>
                    </uncertainty>
                   </item>
                   <item type="UncertainValue" >
                    <value type="float" >0.030000000000000006</value>
                    <uncertainty type="Uncertainty" >
                     <precision type="int" >1000000</precision>
                     <uncertainty type="int" >0</uncertainty>
                    </uncertainty>
                   </item>
                   <item type="UncertainValue" >
                    <value type="float" >0.030000000000000006</value>
                    <uncertainty type="Uncertainty" >
                     <precision type="int" >1000000</precision>
                     <uncertainty type="int" >0</uncertainty>
                    </uncertainty>
                   </item>
                   <item type="UncertainValue" >
                    <value type="float" >-1.9771613478563597e-18</value>
                    <uncertainty type="Uncertainty" >
                     <precision type="int" >1000000</precision>
                     <uncertainty type="int" >0</uncertainty>
                    </uncertainty>
                   </item>
                   <item type="UncertainValue" >
                    <value type="float" >0.0022023678067296</value>
                    <uncertainty type="Uncertainty" >
                     <precision type="int" >1000000</precision>
                     <uncertainty type="int" >0</uncertainty>
                    </uncertainty>
                   </item>
                   <item type="UncertainValue" >
                    <value type="float" >-1.9771613478563593e-18</value>
                    <uncertainty type="Uncertainty" >
                     <precision type="int" >1000000</precision>
                     <uncertainty type="int" >0</uncertainty>
                    </uncertainty>
                   </item>
                  </uvalues>
                  <type type="AtomicDisplacementParameters::Type" >
                   <enumerator type="int" >1</enumerator>
                  </type>
                  <u_equivalent type="float" >0.029999999999999999</u_equivalent>
                 </value>
                </adps>
               </value>
              </site>
              <annotations type="Annotations" >
               <annotations type="Container" >
                <count type="int" >1</count>
                <item type="Handle" >
                 <serial_number type="int" >65</serial_number>
                 <value type="FileOrdering" >
                  <value type="Handle" >
                   <serial_number type="int" >66</serial_number>
                   <value type="FileOrdering" >
                    <file_order type="int" >9</file_order>
                   </value>
                  </value>
                 </value>
                </item>
               </annotations>
              </annotations>
             </value>
            </item>
            <item type="Handle" >
             <serial_number type="int" >67</serial_number>
             <value type="Atom3d" >
              <element type="Element" >
               <code type="char" >2</code>
              </element>
              <formal_charge type="int" >0</formal_charge>
              <radius type="float" >0.23000000000000001</radius>
              <label type="string" >H4C</label>
              <site type="Handle" >
               <serial_number type="int" >68</serial_number>
               <value type="Site" >
                <orthogonal type="Point" >
                 <coordinates type="Vector" >
                  <vector type="Container" >
                   <count type="int" >3</count>
                   <item type="float" >-3.9483837333260881</item>
                   <item type="float" >7.5865989300000001</item>
                   <item type="float" >3.7901314404980182</item>
                  </vector>
                 </coordinates>
                </orthogonal>
                <fractional type="Point" >
                 <coordinates type="Vector" >
                  <vector type="Container" >
                   <count type="int" >3</count>
                   <item type="float" >-0.37230000000000002</item>
                   <item type="float" >1.0407</item>
                   <item type="float" >0.15190000000000001</item>
                  </vector>
                 </coordinates>
                </fractional>
                <uncertain_value type="UncertainValue" >
                 <value type="float" >1</value>
                 <uncertainty type="Uncertainty" >
                  <precision type="int" >0</precision>
                  <uncertainty type="int" >0</uncertainty>
                 </uncertainty>
                </uncertain_value>
                <uncertainty type="Handle" >
                 <serial_number type="int" >69</serial_number>
                 <value type="Container" >
                  <count type="int" >3</count>
                  <item type="Uncertainty" >
                   <precision type="int" >4</precision>
                   <uncertainty type="int" >0</uncertainty>
                  </item>
                  <item type="Uncertainty" >
                   <precision type="int" >4</precision>
                   <uncertainty type="int" >0</uncertainty>
                  </item>
                  <item type="Uncertainty" >
                   <precision type="int" >4</precision>
                   <uncertainty type="int" >0</uncertainty>
                  </item>
                 </value>
                </uncertainty>
                <adps type="Handle" >
                 <serial_number type="int" >70</serial_number>
                 <value type="AtomicDisplacementParameters" >
                  <uvalues type="Container" >
                   <count type="int" >6</count>
                   <item type="UncertainValue" >
                    <value type="float" >0.029999999999999999</value>
                    <uncertainty type="Uncertainty" >
                     <precision type="int" >1000000</precision>
                     <uncertainty type="int" >0</uncertainty>
                    </uncertainty>
                   </item>
                   <item type="UncertainValue" >
                    <value type="float" >0.030000000000000006</value>
                    <uncertainty type="Uncertainty" >
                     <precision type="int" >1000000</precision>
                     <uncertainty type="int" >0</uncertainty>
                    </uncertainty>
                   </item>
                   <item type="UncertainValue" >
                    <value type="float" >0.030000000000000006</value>
                    <uncertainty type="Uncertainty" >
                     <precision type="int" >1000000</precision>
                     <uncertainty type="int" >0</uncertainty>
                    </uncertainty>
                   </item>
                   <item type="UncertainValue" >
                    <value type="float" >-1.9771613478563597e-18</value>
                    <uncertainty type="Uncertainty" >
                     <precision type="int" >1000000</precision>
                     <uncertainty type="int" >0</uncertainty>
                    </uncertainty>
                   </item>
                   <item type="UncertainValue" >
                    <value type="float" >0.0022023678067296</value>
                    <uncertainty type="Uncertainty" >
                     <precision type="int" >1000000</precision>
                     <uncertainty type="int" >0</uncertainty>
                    </uncertainty>
                   </item>
                   <item type="UncertainValue" >
                    <value type="float" >-1.9771613478563593e-18</value>
                    <uncertainty type="Uncertainty" >
                     <precision type="int" >1000000</precision>
                     <uncertainty type="int" >0</uncertainty>
                    </uncertainty>
                   </item>
                  </uvalues>
                  <type type="AtomicDisplacementParameters::Type" >
                   <enumerator type="int" >1</enumerator>
                  </type>
                  <u_equivalent type="float" >0.029999999999999999</u_equivalent>
                 </value>
                </adps>
               </value>
              </site>
              <annotations type="Annotations" >
               <annotations type="Container" >
                <count type="int" >1</count>
                <item type="Handle" >
                 <serial_number type="int" >71</serial_number>
                 <value type="FileOrdering" >
                  <value type="Handle" >
                   <serial_number type="int" >72</serial_number>
                   <value type="FileOrdering" >
                    <file_order type="int" >10</file_order>
                   </value>
                  </value>
                 </value>
                </item>
               </annotations>
              </annotations>
             </value>
            </item>
            <item type="Handle" >
             <serial_number type="int" >73</serial_number>
             <value type="Atom3d" >
              <element type="Element" >
               <code type="char" >1</code>
              </element>
              <formal_charge type="int" >0</formal_charge>
              <radius type="float" >0.68000000000000005</radius>
              <label type="string" >C5</label>
              <site type="Handle" >
               <serial_number type="int" >74</serial_number>
               <value type="Site" >
                <orthogonal type="Point" >
                 <coordinates type="Vector" >
                  <vector type="Container" >
                   <count type="int" >3</count>
                   <item type="float" >-2.2579783568974117</item>
                   <item type="float" >8.7781330850000003</item>
                   <item type="float" >2.1231223454376322</item>
                  </vector>
                 </coordinates>
                </orthogonal>
                <fractional type="Point" >
                 <coordinates type="Vector" >
                  <vector type="Container" >
                   <count type="int" >3</count>
                   <item type="float" >-0.21324000000000001</item>
                   <item type="float" >1.2041500000000001</item>
                   <item type="float" >0.085089999999999999</item>
                  </vector>
                 </coordinates>
                </fractional>
                <uncertain_value type="UncertainValue" >
                 <value type="float" >1</value>
                 <uncertainty type="Uncertainty" >
                  <precision type="int" >0</precision>
                  <uncertainty type="int" >0</uncertainty>
                 </uncertainty>
                </uncertain_value>
                <uncertainty type="Handle" >
                 <serial_number type="int" >75</serial_number>
                 <value type="Container" >
                  <count type="int" >3</count>
                  <item type="Uncertainty" >
                   <precision type="int" >5</precision>
                   <uncertainty type="int" >11</uncertainty>
                  </item>
                  <item type="Uncertainty" >
                   <precision type="int" >5</precision>
                   <uncertainty type="int" >14</uncertainty>
                  </item>
                  <item type="Uncertainty" >
                   <precision type="int" >5</precision>
                   <uncertainty type="int" >4</uncertainty>
                  </item>
                 </value>
                </uncertainty>
                <adps type="Handle" >
                 <serial_number type="int" >76</serial_number>
                 <value type="AtomicDisplacementParameters" >
                  <uvalues type="Container" >
                   <count type="int" >6</count>
                   <item type="UncertainValue" >
                    <value type="float" >0.0241</value>
                    <uncertainty type="Uncertainty" >
                     <precision type="int" >4</precision>
                     <uncertainty type="int" >5</uncertainty>
                    </uncertainty>
                   </item>
                   <item type="UncertainValue" >
                    <value type="float" >0.0155</value>
                    <uncertainty type="Uncertainty" >
                     <precision type="int" >4</precision>
                     <uncertainty type="int" >5</uncertainty>
                    </uncertainty>
                   </item>
                   <item type="UncertainValue" >
                    <value type="float" >0.0206</value>
                    <uncertainty type="Uncertainty" >
                     <precision type="int" >4</precision>
                     <uncertainty type="int" >5</uncertainty>
                    </uncertainty>
                   </item>
                   <item type="UncertainValue" >
                    <value type="float" >0.0014</value>
                    <uncertainty type="Uncertainty" >
                     <precision type="int" >4</precision>
                     <uncertainty type="int" >4</uncertainty>
                    </uncertainty>
                   </item>
                   <item type="UncertainValue" >
                    <value type="float" >0.0028999999999999998</value>
                    <uncertainty type="Uncertainty" >
                     <precision type="int" >4</precision>
                     <uncertainty type="int" >4</uncertainty>
                    </uncertainty>
                   </item>
                   <item type="UncertainValue" >
                    <value type="float" >-0.00040000000000000002</value>
                    <uncertainty type="Uncertainty" >
                     <precision type="int" >4</precision>
                     <uncertainty type="int" >4</uncertainty>
                    </uncertainty>
                   </item>
                  </uvalues>
                  <type type="AtomicDisplacementParameters::Type" >
                   <enumerator type="int" >0</enumerator>
                  </type>
                  <u_equivalent type="float" >0.020004703820089367</u_equivalent>
                 </value>
                </adps>
               </value>
              </site>
              <annotations type="Annotations" >
               <annotations type="Container" >
                <count type="int" >1</count>
                <item type="Handle" >
                 <serial_number type="int" >77</serial_number>
                 <value type="FileOrdering" >
                  <value type="Handle" >
                   <serial_number type="int" >78</serial_number>
                   <value type="FileOrdering" >
                    <file_order type="int" >11</file_order>
                   </value>
                  </value>
                 </value>
                </item>
               </annotations>
              </annotations>
             </value>
            </item>
            <item type="Handle" >
             <serial_number type="int" >79</serial_number>
             <value type="Atom3d" >
              <element type="Element" >
               <code type="char" >2</code>
              </element>
              <formal_charge type="int" >0</formal_charge>
              <radius type="float" >0.23000000000000001</radius>
              <label type="string" >H5A</label>
              <site type="Handle" >
               <serial_number type="int" >80</serial_number>
               <value type="Site" >
                <orthogonal type="Point" >
                 <coordinates type="Vector" >
                  <vector type="Container" >
                   <count type="int" >3</count>
                   <item type="float" >-2.1663950723663885</item>
                   <item type="float" >9.1451795499999999</item>
                   <item type="float" >3.0266158244398262</item>
                  </vector>
                 </coordinates>
                </orthogonal>
                <fractional type="Point" >
                 <coordinates type="Vector" >
                  <vector type="Container" >
                   <count type="int" >3</count>
                   <item type="float" >-0.19719999999999999</item>
                   <item type="float" >1.2544999999999999</item>
                   <item type="float" >0.12130000000000001</item>
                  </vector>
                 </coordinates>
                </fractional>
                <uncertain_value type="UncertainValue" >
                 <value type="float" >1</value>
                 <uncertainty type="Uncertainty" >
                  <precision type="int" >0</precision>
                  <uncertainty type="int" >0</uncertainty>
                 </uncertainty>
                </uncertain_value>
                <uncertainty type="Handle" >
                 <serial_number type="int" >81</serial_number>
                 <value type="Container" >
                  <count type="int" >3</count>
                  <item type="Uncertainty" >
                   <precision type="int" >4</precision>
                   <uncertainty type="int" >0</uncertainty>
                  </item>
                  <item type="Uncertainty" >
                   <precision type="int" >4</precision>
                   <uncertainty type="int" >0</uncertainty>
                  </item>
                  <item type="Uncertainty" >
                   <precision type="int" >4</precision>
                   <uncertainty type="int" >0</uncertainty>
                  </item>
                 </value>
                </uncertainty>
                <adps type="Handle" >
                 <serial_number type="int" >82</serial_number>
                 <value type="AtomicDisplacementParameters" >
                  <uvalues type="Container" >
                   <count type="int" >6</count>
                   <item type="UncertainValue" >
                    <value type="float" >0.029999999999999999</value>
                    <uncertainty type="Uncertainty" >
                     <precision type="int" >1000000</precision>
                     <uncertainty type="int" >0</uncertainty>
                    </uncertainty>
                   </item>
                   <item type="UncertainValue" >
                    <value type="float" >0.030000000000000006</value>
                    <uncertainty type="Uncertainty" >
                     <precision type="int" >1000000</precision>
                     <uncertainty type="int" >0</uncertainty>
                    </uncertainty>
                   </item>
                   <item type="UncertainValue" >
                    <value type="float" >0.030000000000000006</value>
                    <uncertainty type="Uncertainty" >
                     <precision type="int" >1000000</precision>
                     <uncertainty type="int" >0</uncertainty>
                    </uncertainty>
                   </item>
                   <item type="UncertainValue" >
                    <value type="float" >-1.9771613478563597e-18</value>
                    <uncertainty type="Uncertainty" >
                     <precision type="int" >1000000</precision>
                     <uncertainty type="int" >0</uncertainty>
                    </uncertainty>
                   </item>
                   <item type="UncertainValue" >
                    <value type="float" >0.0022023678067296</value>
                    <uncertainty type="Uncertainty" >
                     <precision type="int" >1000000</precision>
                     <uncertainty type="int" >0</uncertainty>
                    </uncertainty>
                   </item>
                   <item type="UncertainValue" >
                    <value type="float" >-1.9771613478563593e-18</value>
                    <uncertainty type="Uncertainty" >
                     <precision type="int" >1000000</precision>
                     <uncertainty type="int" >0</uncertainty>
                    </uncertainty>
                   </item>
                  </uvalues>
                  <type type="AtomicDisplacementParameters::Type" >
                   <enumerator type="int" >1</enumerator>
                  </type>
                  <u_equivalent type="float" >0.029999999999999999</u_equivalent>
                 </value>
                </adps>
               </value>
              </site>
              <annotations type="Annotations" >
               <annotations type="Container" >
                <count type="int" >1</count>
                <item type="Handle" >
                 <serial_number type="int" >83</serial_number>
                 <value type="FileOrdering" >
                  <value type="Handle" >
                   <serial_number type="int" >84</serial_number>
                   <value type="FileOrdering" >
                    <file_order type="int" >12</file_order>
                   </value>
                  </value>
                 </value>
                </item>
               </annotations>
              </annotations>
             </value>
            </item>
            <item type="Handle" >
             <serial_number type="int" >85</serial_number>
             <value type="Atom3d" >
              <element type="Element" >
               <code type="char" >2</code>
              </element>
              <formal_charge type="int" >0</formal_charge>
              <radius type="float" >0.23000000000000001</radius>
              <label type="string" >H5B</label>
              <site type="Handle" >
               <serial_number type="int" >86</serial_number>
               <value type="Site" >
                <orthogonal type="Point" >
                 <coordinates type="Vector" >
                  <vector type="Container" >
                   <count type="int" >3</count>
                   <item type="float" >-2.951314477942883</item>
                   <item type="float" >9.272752800000001</item>
                   <item type="float" >1.6393129403602353</item>
                  </vector>
                 </coordinates>
                </orthogonal>
                <fractional type="Point" >
                 <coordinates type="Vector" >
                  <vector type="Container" >
                   <count type="int" >3</count>
                   <item type="float" >-0.28720000000000001</item>
                   <item type="float" >1.272</item>
                   <item type="float" >0.065699999999999995</item>
                  </vector>
                 </coordinates>
                </fractional>
                <uncertain_value type="UncertainValue" >
                 <value type="float" >1</value>
                 <uncertainty type="Uncertainty" >
                  <precision type="int" >0</precision>
                  <uncertainty type="int" >0</uncertainty>
                 </uncertainty>
                </uncertain_value>
                <uncertainty type="Handle" >
                 <serial_number type="int" >87</serial_number>
                 <value type="Container" >
                  <count type="int" >3</count>
                  <item type="Uncertainty" >
                   <precision type="int" >4</precision>
                   <uncertainty type="int" >0</uncertainty>
                  </item>
                  <item type="Uncertainty" >
                   <precision type="int" >4</precision>
                   <uncertainty type="int" >0</uncertainty>
                  </item>
                  <item type="Uncertainty" >
                   <precision type="int" >4</precision>
                   <uncertainty type="int" >0</uncertainty>
                  </item>
                 </value>
                </uncertainty>
                <adps type="Handle" >
                 <serial_number type="int" >88</serial_number>
                 <value type="AtomicDisplacementParameters" >
                  <uvalues type="Container" >
                   <count type="int" >6</count>
                   <item type="UncertainValue" >
                    <value type="float" >0.029999999999999999</value>
                    <uncertainty type="Uncertainty" >
                     <precision type="int" >1000000</precision>
                     <uncertainty type="int" >0</uncertainty>
                    </uncertainty>
                   </item>
                   <item type="UncertainValue" >
                    <value type="float" >0.030000000000000006</value>
                    <uncertainty type="Uncertainty" >
                     <precision type="int" >1000000</precision>
                     <uncertainty type="int" >0</uncertainty>
                    </uncertainty>
                   </item>
                   <item type="UncertainValue" >
                    <value type="float" >0.030000000000000006</value>
                    <uncertainty type="Uncertainty" >
                     <precision type="int" >1000000</precision>
                     <uncertainty type="int" >0</uncertainty>
                    </uncertainty>
                   </item>
                   <item type="UncertainValue" >
                    <value type="float" >-1.9771613478563597e-18</value>
                    <uncertainty type="Uncertainty" >
                     <precision type="int" >1000000</precision>
                     <uncertainty type="int" >0</uncertainty>
                    </uncertainty>
                   </item>
                   <item type="UncertainValue" >
                    <value type="float" >0.0022023678067296</value>
                    <uncertainty type="Uncertainty" >
                     <precision type="int" >1000000</precision>
                     <uncertainty type="int" >0</uncertainty>
                    </uncertainty>
                   </item>
                   <item type="UncertainValue" >
                    <value type="float" >-1.9771613478563593e-18</value>
                    <uncertainty type="Uncertainty" >
                     <precision type="int" >1000000</precision>
                     <uncertainty type="int" >0</uncertainty>
                    </uncertainty>
                   </item>
                  </uvalues>
                  <type type="AtomicDisplacementParameters::Type" >
                   <enumerator type="int" >1</enumerator>
                  </type>
                  <u_equivalent type="float" >0.029999999999999999</u_equivalent>
                 </value>
                </adps>
               </value>
              </site>
              <annotations type="Annotations" >
               <annotations type="Container" >
                <count type="int" >1</count>
                <item type="Handle" >
                 <serial_number type="int" >89</serial_number>
                 <value type="FileOrdering" >
                  <value type="Handle" >
                   <serial_number type="int" >90</serial_number>
                   <value type="FileOrdering" >
                    <file_order type="int" >13</file_order>
                   </value>
                  </value>
                 </value>
                </item>
               </annotations>
              </annotations>
             </value>
            </item>
            <item type="Handle" >
             <serial_number type="int" >91</serial_number>
             <value type="Atom3d" >
              <element type="Element" >
               <code type="char" >2</code>
              </element>
              <formal_charge type="int" >0</formal_charge>
              <radius type="float" >0.23000000000000001</radius>
              <label type="string" >H5C</label>
              <site type="Handle" >
               <serial_number type="int" >92</serial_number>
               <value type="Site" >
                <orthogonal type="Point" >
                 <coordinates type="Vector" >
                  <vector type="Container" >
                   <count type="int" >3</count>
                   <item type="float" >-1.4046571584783041</item>
                   <item type="float" >8.8623314300000011</item>
                   <item type="float" >1.6492935366485779</item>
                  </vector>
                 </coordinates>
                </orthogonal>
                <fractional type="Point" >
                 <coordinates type="Vector" >
                  <vector type="Container" >
                   <count type="int" >3</count>
                   <item type="float" >-0.13020000000000001</item>
                   <item type="float" >1.2157</item>
                   <item type="float" >0.066100000000000006</item>
                  </vector>
                 </coordinates>
                </fractional>
                <uncertain_value type="UncertainValue" >
                 <value type="float" >1</value>
                 <uncertainty type="Uncertainty" >
                  <precision type="int" >0</precision>
                  <uncertainty type="int" >0</uncertainty>
                 </uncertainty>
                </uncertain_value>
                <uncertainty type="Handle" >
                 <serial_number type="int" >93</serial_number>
                 <value type="Container" >
                  <count type="int" >3</count>
                  <item type="Uncertainty" >
                   <precision type="int" >4</precision>
                   <uncertainty type="int" >0</uncertainty>
                  </item>
                  <item type="Uncertainty" >
                   <precision type="int" >4</precision>
                   <uncertainty type="int" >0</uncertainty>
                  </item>
                  <item type="Uncertainty" >
                   <precision type="int" >4</precision>
                   <uncertainty type="int" >0</uncertainty>
                  </item>
                 </value>
                </uncertainty>
                <adps type="Handle" >
                 <serial_number type="int" >94</serial_number>
                 <value type="AtomicDisplacementParameters" >
                  <uvalues type="Container" >
                   <count type="int" >6</count>
                   <item type="UncertainValue" >
                    <value type="float" >0.029999999999999999</value>
                    <uncertainty type="Uncertainty" >
                     <precision type="int" >1000000</precision>
                     <uncertainty type="int" >0</uncertainty>
                    </uncertainty>
                   </item>
                   <item type="UncertainValue" >
                    <value type="float" >0.030000000000000006</value>
                    <uncertainty type="Uncertainty" >
                     <precision type="int" >1000000</precision>
                     <uncertainty type="int" >0</uncertainty>
                    </uncertainty>
                   </item>
                   <item type="UncertainValue" >
                    <value type="float" >0.030000000000000006</value>
                    <uncertainty type="Uncertainty" >
                     <precision type="int" >1000000</precision>
                     <uncertainty type="int" >0</uncertainty>
                    </uncertainty>
                   </item>
                   <item type="UncertainValue" >
                    <value type="float" >-1.9771613478563597e-18</value>
                    <uncertainty type="Uncertainty" >
                     <precision type="int" >1000000</precision>
                     <uncertainty type="int" >0</uncertainty>
                    </uncertainty>
                   </item>
                   <item type="UncertainValue" >
                    <value type="float" >0.0022023678067296</value>
                    <uncertainty type="Uncertainty" >
                     <precision type="int" >1000000</precision>
                     <uncertainty type="int" >0</uncertainty>
                    </uncertainty>
                   </item>
                   <item type="UncertainValue" >
                    <value type="float" >-1.9771613478563593e-18</value>
                    <uncertainty type="Uncertainty" >
                     <precision type="int" >1000000</precision>
                     <uncertainty type="int" >0</uncertainty>
                    </uncertainty>
                   </item>
                  </uvalues>
                  <type type="AtomicDisplacementParameters::Type" >
                   <enumerator type="int" >1</enumerator>
                  </type>
                  <u_equivalent type="float" >0.029999999999999999</u_equivalent>
                 </value>
                </adps>
               </value>
              </site>
              <annotations type="Annotations" >
               <annotations type="Container" >
                <count type="int" >1</count>
                <item type="Handle" >
                 <serial_number type="int" >95</serial_number>
                 <value type="FileOrdering" >
                  <value type="Handle" >
                   <serial_number type="int" >96</serial_number>
                   <value type="FileOrdering" >
                    <file_order type="int" >14</file_order>
                   </value>
                  </value>
                 </value>
                </item>
               </annotations>
              </annotations>
             </value>
            </item>
            <item type="Handle" >
             <serial_number type="int" >97</serial_number>
             <value type="Atom3d" >
              <element type="Element" >
               <code type="char" >1</code>
              </element>
              <formal_charge type="int" >0</formal_charge>
              <radius type="float" >0.68000000000000005</radius>
              <label type="string" >C6</label>
              <site type="Handle" >
               <serial_number type="int" >98</serial_number>
               <value type="Site" >
                <orthogonal type="Point" >
                 <coordinates type="Vector" >
                  <vector type="Container" >
                   <count type="int" >3</count>
                   <item type="float" >-2.7755827978414027</item>
                   <item type="float" >7.3726403649999996</item>
                   <item type="float" >-0.37576945025609054</item>
                  </vector>
                 </coordinates>
                </orthogonal>
                <fractional type="Point" >
                 <coordinates type="Vector" >
                  <vector type="Container" >
                   <count type="int" >3</count>
                   <item type="float" >-0.28442000000000001</item>
                   <item type="float" >1.01135</item>
                   <item type="float" >-0.01506</item>
                  </vector>
                 </coordinates>
                </fractional>
                <uncertain_value type="UncertainValue" >
                 <value type="float" >1</value>
                 <uncertainty type="Uncertainty" >
                  <precision type="int" >0</precision>
                  <uncertainty type="int" >0</uncertainty>
                 </uncertainty>
                </uncertain_value>
                <uncertainty type="Handle" >
                 <serial_number type="int" >99</serial_number>
                 <value type="Container" >
                  <count type="int" >3</count>
                  <item type="Uncertainty" >
                   <precision type="int" >5</precision>
                   <uncertainty type="int" >11</uncertainty>
                  </item>
                  <item type="Uncertainty" >
                   <precision type="int" >5</precision>
                   <uncertainty type="int" >15</uncertainty>
                  </item>
                  <item type="Uncertainty" >
                   <precision type="int" >5</precision>
                   <uncertainty type="int" >4</uncertainty>
                  </item>
                 </value>
                </uncertainty>
                <adps type="Handle" >
                 <serial_number type="int" >100</serial_number>
                 <value type="AtomicDisplacementParameters" >
                  <uvalues type="Container" >
                   <count type="int" >6</count>
                   <item type="UncertainValue" >
                    <value type="float" >0.021100000000000001</value>
                    <uncertainty type="Uncertainty" >
                     <precision type="int" >4</precision>
                     <uncertainty type="int" >5</uncertainty>
                    </uncertainty>
                   </item>
                   <item type="UncertainValue" >
                    <value type="float" >0.023400000000000001</value>
                    <uncertainty type="Uncertainty" >
                     <precision type="int" >4</precision>
                     <uncertainty type="int" >5</uncertainty>
                    </uncertainty>
                   </item>
                   <item type="UncertainValue" >
                    <value type="float" >0.014999999999999999</value>
                    <uncertainty type="Uncertainty" >
                     <precision type="int" >4</precision>
                     <uncertainty type="int" >4</uncertainty>
                    </uncertainty>
                   </item>
                   <item type="UncertainValue" >
                    <value type="float" >0.0025000000000000001</value>
                    <uncertainty type="Uncertainty" >
                     <precision type="int" >4</precision>
                     <uncertainty type="int" >4</uncertainty>
                    </uncertainty>
                   </item>
                   <item type="UncertainValue" >
                    <value type="float" >0.00020000000000000001</value>
                    <uncertainty type="Uncertainty" >
                     <precision type="int" >4</precision>
                     <uncertainty type="int" >3</uncertainty>
                    </uncertainty>
                   </item>
                   <item type="UncertainValue" >
                    <value type="float" >0.002</value>
                    <uncertainty type="Uncertainty" >
                     <precision type="int" >4</precision>
                     <uncertainty type="int" >4</uncertainty>
                    </uncertainty>
                   </item>
                  </uvalues>
                  <type type="AtomicDisplacementParameters::Type" >
                   <enumerator type="int" >0</enumerator>
                  </type>
                  <u_equivalent type="float" >0.019888695362620182</u_equivalent>
                 </value>
                </adps>
               </value>
              </site>
              <annotations type="Annotations" >
               <annotations type="Container" >
                <count type="int" >1</count>
                <item type="Handle" >
                 <serial_number type="int" >101</serial_number>
                 <value type="FileOrdering" >
                  <value type="Handle" >
                   <serial_number type="int" >102</serial_number>
                   <value type="FileOrdering" >
                    <file_order type="int" >15</file_order>
                   </value>
                  </value>
                 </value>
                </item>
               </annotations>
              </annotations>
             </value>
            </item>
            <item type="Handle" >
             <serial_number type="int" >103</serial_number>
             <value type="Atom3d" >
              <element type="Element" >
               <code type="char" >2</code>
              </element>
              <formal_charge type="int" >0</formal_charge>
              <radius type="float" >0.23000000000000001</radius>
              <label type="string" >H6A</label>
              <site type="Handle" >
               <serial_number type="int" >104</serial_number>
               <value type="Site" >
                <orthogonal type="Point" >
                 <coordinates type="Vector" >
                  <vector type="Container" >
                   <count type="int" >3</count>
                   <item type="float" >-2.1438607785831634</item>
                   <item type="float" >8.1216775900000009</item>
                   <item type="float" >-0.39922385153369511</item>
                  </vector>
                 </coordinates>
                </orthogonal>
                <fractional type="Point" >
                 <coordinates type="Vector" >
                  <vector type="Container" >
                   <count type="int" >3</count>
                   <item type="float" >-0.2205</item>
                   <item type="float" >1.1141000000000001</item>
                   <item type="float" >-0.016</item>
                  </vector>
                 </coordinates>
                </fractional>
                <uncertain_value type="UncertainValue" >
                 <value type="float" >1</value>
                 <uncertainty type="Uncertainty" >
                  <precision type="int" >0</precision>
                  <uncertainty type="int" >0</uncertainty>
                 </uncertainty>
                </uncertain_value>
                <uncertainty type="Handle" >
                 <serial_number type="int" >105</serial_number>
                 <value type="Container" >
                  <count type="int" >3</count>
                  <item type="Uncertainty" >
                   <precision type="int" >4</precision>
                   <uncertainty type="int" >0</uncertainty>
                  </item>
                  <item type="Uncertainty" >
                   <precision type="int" >4</precision>
                   <uncertainty type="int" >0</uncertainty>
                  </item>
                  <item type="Uncertainty" >
                   <precision type="int" >4</precision>
                   <uncertainty type="int" >0</uncertainty>
                  </item>
                 </value>
                </uncertainty>
                <adps type="Handle" >
                 <serial_number type="int" >106</serial_number>
                 <value type="AtomicDisplacementParameters" >
                  <uvalues type="Container" >
                   <count type="int" >6</count>
                   <item type="UncertainValue" >
                    <value type="float" >0.029999999999999999</value>
                    <uncertainty type="Uncertainty" >
                     <precision type="int" >1000000</precision>
                     <uncertainty type="int" >0</uncertainty>
                    </uncertainty>
                   </item>
                   <item type="UncertainValue" >
                    <value type="float" >0.030000000000000006</value>
                    <uncertainty type="Uncertainty" >
                     <precision type="int" >1000000</precision>
                     <uncertainty type="int" >0</uncertainty>
                    </uncertainty>
                   </item>
                   <item type="UncertainValue" >
                    <value type="float" >0.030000000000000006</value>
                    <uncertainty type="Uncertainty" >
                     <precision type="int" >1000000</precision>
                     <uncertainty type="int" >0</uncertainty>
                    </uncertainty>
                   </item>
                   <item type="UncertainValue" >
                    <value type="float" >-1.9771613478563597e-18</value>
                    <uncertainty type="Uncertainty" >
                     <precision type="int" >1000000</precision>
                     <uncertainty type="int" >0</uncertainty>
                    </uncertainty>
                   </item>
                   <item type="UncertainValue" >
                    <value type="float" >0.0022023678067296</value>
                    <uncertainty type="Uncertainty" >
                     <precision type="int" >1000000</precision>
                     <uncertainty type="int" >0</uncertainty>
                    </uncertainty>
                   </item>
                   <item type="UncertainValue" >
                    <value type="float" >-1.9771613478563593e-18</value>
                    <uncertainty type="Uncertainty" >
                     <precision type="int" >1000000</precision>
                     <uncertainty type="int" >0</uncertainty>
                    </uncertainty>
                   </item>
                  </uvalues>
                  <type type="AtomicDisplacementParameters::Type" >
                   <enumerator type="int" >1</enumerator>
                  </type>
                  <u_equivalent type="float" >0.029999999999999999</u_equivalent>
                 </value>
                </adps>
               </value>
              </site>
              <annotations type="Annotations" >
               <annotations type="Container" >
                <count type="int" >1</count>
                <item type="Handle" >
                 <serial_number type="int" >107</serial_number>
                 <value type="FileOrdering" >
                  <value type="Handle" >
                   <serial_number type="int" >108</serial_number>
                   <value type="FileOrdering" >
                    <file_order type="int" >16</file_order>
                   </value>
                  </value>
                 </value>
                </item>
               </annotations>
              </annotations>
             </value>
            </item>
            <item type="Handle" >
             <serial_number type="int" >109</serial_number>
             <value type="Atom3d" >
              <element type="Element" >
               <code type="char" >2</code>
              </element>
              <formal_charge type="int" >0</formal_charge>
              <radius type="float" >0.23000000000000001</radius>
              <label type="string" >H6B</label>
              <site type="Handle" >
               <serial_number type="int" >110</serial_number>
               <value type="Site" >
                <orthogonal type="Point" >
                 <coordinates type="Vector" >
                  <vector type="Container" >
                   <count type="int" >3</count>
                   <item type="float" >-3.6917857111264123</item>
                   <item type="float" >7.7185461200000001</item>
                   <item type="float" >-0.35181601916406879</item>
                  </vector>
                 </coordinates>
                </orthogonal>
                <fractional type="Point" >
                 <coordinates type="Vector" >
                  <vector type="Container" >
                   <count type="int" >3</count>
                   <item type="float" >-0.37719999999999998</item>
                   <item type="float" >1.0588</item>
                   <item type="float" >-0.0141</item>
                  </vector>
                 </coordinates>
                </fractional>
                <uncertain_value type="UncertainValue" >
                 <value type="float" >1</value>
                 <uncertainty type="Uncertainty" >
                  <precision type="int" >0</precision>
                  <uncertainty type="int" >0</uncertainty>
                 </uncertainty>
                </uncertain_value>
                <uncertainty type="Handle" >
                 <serial_number type="int" >111</serial_number>
                 <value type="Container" >
                  <count type="int" >3</count>
                  <item type="Uncertainty" >
                   <precision type="int" >4</precision>
                   <uncertainty type="int" >0</uncertainty>
                  </item>
                  <item type="Uncertainty" >
                   <precision type="int" >4</precision>
                   <uncertainty type="int" >0</uncertainty>
                  </item>
                  <item type="Uncertainty" >
                   <precision type="int" >4</precision>
                   <uncertainty type="int" >0</uncertainty>
                  </item>
                 </value>
                </uncertainty>
                <adps type="Handle" >
                 <serial_number type="int" >112</serial_number>
                 <value type="AtomicDisplacementParameters" >
                  <uvalues type="Container" >
                   <count type="int" >6</count>
                   <item type="UncertainValue" >
                    <value type="float" >0.029999999999999999</value>
                    <uncertainty type="Uncertainty" >
                     <precision type="int" >1000000</precision>
                     <uncertainty type="int" >0</uncertainty>
                    </uncertainty>
                   </item>
                   <item type="UncertainValue" >
                    <value type="float" >0.030000000000000006</value>
                    <uncertainty type="Uncertainty" >
                     <precision type="int" >1000000</precision>
                     <uncertainty type="int" >0</uncertainty>
                    </uncertainty>
                   </item>
                   <item type="UncertainValue" >
                    <value type="float" >0.030000000000000006</value>
                    <uncertainty type="Uncertainty" >
                     <precision type="int" >1000000</precision>
                     <uncertainty type="int" >0</uncertainty>
                    </uncertainty>
                   </item>
                   <item type="UncertainValue" >
                    <value type="float" >-1.9771613478563597e-18</value>
                    <uncertainty type="Uncertainty" >
                     <precision type="int" >1000000</precision>
                     <uncertainty type="int" >0</uncertainty>
                    </uncertainty>
                   </item>
                   <item type="UncertainValue" >
                    <value type="float" >0.0022023678067296</value>
                    <uncertainty type="Uncertainty" >
                     <precision type="int" >1000000</precision>
                     <uncertainty type="int" >0</uncertainty>
                    </uncertainty>
                   </item>
                   <item type="UncertainValue" >
                    <value type="float" >-1.9771613478563593e-18</value>
                    <uncertainty type="Uncertainty" >
                     <precision type="int" >1000000</precision>
                     <uncertainty type="int" >0</uncertainty>
                    </uncertainty>
                   </item>
                  </uvalues>
                  <type type="AtomicDisplacementParameters::Type" >
                   <enumerator type="int" >1</enumerator>
                  </type>
                  <u_equivalent type="float" >0.029999999999999999</u_equivalent>
                 </value>
                </adps>
               </value>
              </site>
              <annotations type="Annotations" >
               <annotations type="Container" >
                <count type="int" >1</count>
                <item type="Handle" >
                 <serial_number type="int" >113</serial_number>
                 <value type="FileOrdering" >
                  <value type="Handle" >
                   <serial_number type="int" >114</serial_number>
                   <value type="FileOrdering" >
                    <file_order type="int" >17</file_order>
                   </value>
                  </value>
                 </value>
                </item>
               </annotations>
              </annotations>
             </value>
            </item>
            <item type="Handle" >
             <serial_number type="int" >115</serial_number>
             <value type="Atom3d" >
              <element type="Element" >
               <code type="char" >2</code>
              </element>
              <formal_charge type="int" >0</formal_charge>
              <radius type="float" >0.23000000000000001</radius>
              <label type="string" >H6C</label>
              <site type="Handle" >
               <serial_number type="int" >116</serial_number>
               <value type="Site" >
                <orthogonal type="Point" >
                 <coordinates type="Vector" >
                  <vector type="Container" >
                   <count type="int" >3</count>
                   <item type="float" >-2.655430566954188</item>
                   <item type="float" >6.8197014500000002</item>
                   <item type="float" >-1.175215212952315</item>
                  </vector>
                 </coordinates>
                </orthogonal>
                <fractional type="Point" >
                 <coordinates type="Vector" >
                  <vector type="Container" >
                   <count type="int" >3</count>
                   <item type="float" >-0.2782</item>
                   <item type="float" >0.9355</item>
                   <item type="float" >-0.047100000000000003</item>
                  </vector>
                 </coordinates>
                </fractional>
                <uncertain_value type="UncertainValue" >
                 <value type="float" >1</value>
                 <uncertainty type="Uncertainty" >
                  <precision type="int" >0</precision>
                  <uncertainty type="int" >0</uncertainty>
                 </uncertainty>
                </uncertain_value>
                <uncertainty type="Handle" >
                 <serial_number type="int" >117</serial_number>
                 <value type="Container" >
                  <count type="int" >3</count>
                  <item type="Uncertainty" >
                   <precision type="int" >4</precision>
                   <uncertainty type="int" >0</uncertainty>
                  </item>
                  <item type="Uncertainty" >
                   <precision type="int" >4</precision>
                   <uncertainty type="int" >0</uncertainty>
                  </item>
                  <item type="Uncertainty" >
                   <precision type="int" >4</precision>
                   <uncertainty type="int" >0</uncertainty>
                  </item>
                 </value>
                </uncertainty>
                <adps type="Handle" >
                 <serial_number type="int" >118</serial_number>
                 <value type="AtomicDisplacementParameters" >
                  <uvalues type="Container" >
                   <count type="int" >6</count>
                   <item type="UncertainValue" >
                    <value type="float" >0.029999999999999999</value>
                    <uncertainty type="Uncertainty" >
                     <precision type="int" >1000000</precision>
                     <uncertainty type="int" >0</uncertainty>
                    </uncertainty>
                   </item>
                   <item type="UncertainValue" >
                    <value type="float" >0.030000000000000006</value>
                    <uncertainty type="Uncertainty" >
                     <precision type="int" >1000000</precision>
                     <uncertainty type="int" >0</uncertainty>
                    </uncertainty>
                   </item>
                   <item type="UncertainValue" >
                    <value type="float" >0.030000000000000006</value>
                    <uncertainty type="Uncertainty" >
                     <precision type="int" >1000000</precision>
                     <uncertainty type="int" >0</uncertainty>
                    </uncertainty>
                   </item>
                   <item type="UncertainValue" >
                    <value type="float" >-1.9771613478563597e-18</value>
                    <uncertainty type="Uncertainty" >
                     <precision type="int" >1000000</precision>
                     <uncertainty type="int" >0</uncertainty>
                    </uncertainty>
                   </item>
                   <item type="UncertainValue" >
                    <value type="float" >0.0022023678067296</value>
                    <uncertainty type="Uncertainty" >
                     <precision type="int" >1000000</precision>
                     <uncertainty type="int" >0</uncertainty>
                    </uncertainty>
                   </item>
                   <item type="UncertainValue" >
                    <value type="float" >-1.9771613478563593e-18</value>
                    <uncertainty type="Uncertainty" >
                     <precision type="int" >1000000</precision>
                     <uncertainty type="int" >0</uncertainty>
                    </uncertainty>
                   </item>
                  </uvalues>
                  <type type="AtomicDisplacementParameters::Type" >
                   <enumerator type="int" >1</enumerator>
                  </type>
                  <u_equivalent type="float" >0.029999999999999999</u_equivalent>
                 </value>
                </adps>
               </value>
              </site>
              <annotations type="Annotations" >
               <annotations type="Container" >
                <count type="int" >1</count>
                <item type="Handle" >
                 <serial_number type="int" >119</serial_number>
                 <value type="FileOrdering" >
                  <value type="Handle" >
                   <serial_number type="int" >120</serial_number>
                   <value type="FileOrdering" >
                    <file_order type="int" >18</file_order>
                   </value>
                  </value>
                 </value>
                </item>
               </annotations>
              </annotations>
             </value>
            </item>
            <item type="Handle" >
             <serial_number type="int" >121</serial_number>
             <value type="Atom3d" >
              <element type="Element" >
               <code type="char" >1</code>
              </element>
              <formal_charge type="int" >0</formal_charge>
              <radius type="float" >0.68000000000000005</radius>
              <label type="string" >C7</label>
              <site type="Handle" >
               <serial_number type="int" >122</serial_number>
               <value type="Site" >
                <orthogonal type="Point" >
                 <coordinates type="Vector" >
                  <vector type="Container" >
                   <count type="int" >3</count>
                   <item type="float" >-3.3106069693730071</item>
                   <item type="float" >5.216871137</item>
                   <item type="float" >0.82714191739637455</item>
                  </vector>
                 </coordinates>
                </orthogonal>
                <fractional type="Point" >
                 <coordinates type="Vector" >
                  <vector type="Container" >
                   <count type="int" >3</count>
                   <item type="float" >-0.32972000000000001</item>
                   <item type="float" >0.71562999999999999</item>
                   <item type="float" >0.033149999999999999</item>
                  </vector>
                 </coordinates>
                </fractional>
                <uncertain_value type="UncertainValue" >
                 <value type="float" >1</value>
                 <uncertainty type="Uncertainty" >
                  <precision type="int" >0</precision>
                  <uncertainty type="int" >0</uncertainty>
                 </uncertainty>
                </uncertain_value>
                <uncertainty type="Handle" >
                 <serial_number type="int" >123</serial_number>
                 <value type="Container" >
                  <count type="int" >3</count>
                  <item type="Uncertainty" >
                   <precision type="int" >5</precision>
                   <uncertainty type="int" >11</uncertainty>
                  </item>
                  <item type="Uncertainty" >
                   <precision type="int" >5</precision>
                   <uncertainty type="int" >15</uncertainty>
                  </item>
                  <item type="Uncertainty" >
                   <precision type="int" >5</precision>
                   <uncertainty type="int" >4</uncertainty>
                  </item>
                 </value>
                </uncertainty>
                <adps type="Handle" >
                 <serial_number type="int" >124</serial_number>
                 <value type="AtomicDisplacementParameters" >
                  <uvalues type="Container" >
                   <count type="int" >6</count>
                   <item type="UncertainValue" >
                    <value type="float" >0.019199999999999998</value>
                    <uncertainty type="Uncertainty" >
                     <precision type="int" >4</precision>
                     <uncertainty type="int" >5</uncertainty>
                    </uncertainty>
                   </item>
                   <item type="UncertainValue" >
                    <value type="float" >0.02</value>
                    <uncertainty type="Uncertainty" >
                     <precision type="int" >4</precision>
                     <uncertainty type="int" >5</uncertainty>
                    </uncertainty>
                   </item>
                   <item type="UncertainValue" >
                    <value type="float" >0.023300000000000001</value>
                    <uncertainty type="Uncertainty" >
                     <precision type="int" >4</precision>
                     <uncertainty type="int" >5</uncertainty>
                    </uncertainty>
                   </item>
                   <item type="UncertainValue" >
                    <value type="float" >-0.0030000000000000001</value>
                    <uncertainty type="Uncertainty" >
                     <precision type="int" >4</precision>
                     <uncertainty type="int" >4</uncertainty>
                    </uncertainty>
                   </item>
                   <item type="UncertainValue" >
                    <value type="float" >0.00080000000000000004</value>
                    <uncertainty type="Uncertainty" >
                     <precision type="int" >4</precision>
                     <uncertainty type="int" >4</uncertainty>
                    </uncertainty>
                   </item>
                   <item type="UncertainValue" >
                    <value type="float" >-0.0011000000000000001</value>
                    <uncertainty type="Uncertainty" >
                     <precision type="int" >4</precision>
                     <uncertainty type="int" >4</uncertainty>
                    </uncertainty>
                   </item>
                  </uvalues>
                  <type type="AtomicDisplacementParameters::Type" >
                   <enumerator type="int" >0</enumerator>
                  </type>
                  <u_equivalent type="float" >0.02087073094303632</u_equivalent>
                 </value>
                </adps>
               </value>
              </site>
              <annotations type="Annotations" >
               <annotations type="Container" >
                <count type="int" >1</count>
                <item type="Handle" >
                 <serial_number type="int" >125</serial_number>
                 <value type="FileOrdering" >
                  <value type="Handle" >
                   <serial_number type="int" >126</serial_number>
                   <value type="FileOrdering" >
                    <file_order type="int" >19</file_order>
                   </value>
                  </value>
                 </value>
                </item>
               </annotations>
              </annotations>
             </value>
            </item>
            <item type="Handle" >
             <serial_number type="int" >127</serial_number>
             <value type="Atom3d" >
              <element type="Element" >
               <code type="char" >2</code>
              </element>
              <formal_charge type="int" >0</formal_charge>
              <radius type="float" >0.23000000000000001</radius>
              <label type="string" >H7A</label>
              <site type="Handle" >
               <serial_number type="int" >128</serial_number>
               <value type="Site" >
                <orthogonal type="Point" >
                 <coordinates type="Vector" >
                  <vector type="Container" >
                   <count type="int" >3</count>
                   <item type="float" >-3.0211460130786696</item>
                   <item type="float" >4.6830317599999995</item>
                   <item type="float" >0.057388428657968671</item>
                  </vector>
                 </coordinates>
                </orthogonal>
                <fractional type="Point" >
                 <coordinates type="Vector" >
                  <vector type="Container" >
                   <count type="int" >3</count>
                   <item type="float" >-0.30609999999999998</item>
                   <item type="float" >0.64239999999999997</item>
                   <item type="float" >0.0023</item>
                  </vector>
                 </coordinates>
                </fractional>
                <uncertain_value type="UncertainValue" >
                 <value type="float" >1</value>
                 <uncertainty type="Uncertainty" >
                  <precision type="int" >0</precision>
                  <uncertainty type="int" >0</uncertainty>
                 </uncertainty>
                </uncertain_value>
                <uncertainty type="Handle" >
                 <serial_number type="int" >129</serial_number>
                 <value type="Container" >
                  <count type="int" >3</count>
                  <item type="Uncertainty" >
                   <precision type="int" >4</precision>
                   <uncertainty type="int" >0</uncertainty>
                  </item>
                  <item type="Uncertainty" >
                   <precision type="int" >4</precision>
                   <uncertainty type="int" >0</uncertainty>
                  </item>
                  <item type="Uncertainty" >
                   <precision type="int" >4</precision>
                   <uncertainty type="int" >0</uncertainty>
                  </item>
                 </value>
                </uncertainty>
                <adps type="Handle" >
                 <serial_number type="int" >130</serial_number>
                 <value type="AtomicDisplacementParameters" >
                  <uvalues type="Container" >
                   <count type="int" >6</count>
                   <item type="UncertainValue" >
                    <value type="float" >0.030999999999999996</value>
                    <uncertainty type="Uncertainty" >
                     <precision type="int" >1000000</precision>
                     <uncertainty type="int" >0</uncertainty>
                    </uncertainty>
                   </item>
                   <item type="UncertainValue" >
                    <value type="float" >0.031</value>
                    <uncertainty type="Uncertainty" >
                     <precision type="int" >1000000</precision>
                     <uncertainty type="int" >0</uncertainty>
                    </uncertainty>
                   </item>
                   <item type="UncertainValue" >
                    <value type="float" >0.03100000000000001</value>
                    <uncertainty type="Uncertainty" >
                     <precision type="int" >1000000</precision>
                     <uncertainty type="int" >0</uncertainty>
                    </uncertainty>
                   </item>
                   <item type="UncertainValue" >
                    <value type="float" >-2.0430667261182383e-18</value>
                    <uncertainty type="Uncertainty" >
                     <precision type="int" >1000000</precision>
                     <uncertainty type="int" >0</uncertainty>
                    </uncertainty>
                   </item>
                   <item type="UncertainValue" >
                    <value type="float" >0.0022757800669539201</value>
                    <uncertainty type="Uncertainty" >
                     <precision type="int" >1000000</precision>
                     <uncertainty type="int" >0</uncertainty>
                    </uncertainty>
                   </item>
                   <item type="UncertainValue" >
                    <value type="float" >-2.043066726118238e-18</value>
                    <uncertainty type="Uncertainty" >
                     <precision type="int" >1000000</precision>
                     <uncertainty type="int" >0</uncertainty>
                    </uncertainty>
                   </item>
                  </uvalues>
                  <type type="AtomicDisplacementParameters::Type" >
                   <enumerator type="int" >1</enumerator>
                  </type>
                  <u_equivalent type="float" >0.031</u_equivalent>
                 </value>
                </adps>
               </value>
              </site>
              <annotations type="Annotations" >
               <annotations type="Container" >
                <count type="int" >1</count>
                <item type="Handle" >
                 <serial_number type="int" >131</serial_number>
                 <value type="FileOrdering" >
                  <value type="Handle" >
                   <serial_number type="int" >132</serial_number>
                   <value type="FileOrdering" >
                    <file_order type="int" >20</file_order>
                   </value>
                  </value>
                 </value>
                </item>
               </annotations>
              </annotations>
             </value>
            </item>
            <item type="Handle" >
             <serial_number type="int" >133</serial_number>
             <value type="Atom3d" >
              <element type="Element" >
               <code type="char" >2</code>
              </element>
              <formal_charge type="int" >0</formal_charge>
              <radius type="float" >0.23000000000000001</radius>
              <label type="string" >H7B</label>
              <site type="Handle" >
               <serial_number type="int" >134</serial_number>
               <value type="Site" >
                <orthogonal type="Point" >
                 <coordinates type="Vector" >
                  <vector type="Container" >
                   <count type="int" >3</count>
                   <item type="float" >-4.267371770022713</item>
                   <item type="float" >5.4134797400000005</item>
                   <item type="float" >0.74604957255359272</item>
                  </vector>
                 </coordinates>
                </orthogonal>
                <fractional type="Point" >
                 <coordinates type="Vector" >
                  <vector type="Container" >
                   <count type="int" >3</count>
                   <item type="float" >-0.4274</item>
                   <item type="float" >0.74260000000000004</item>
                   <item type="float" >0.029899999999999999</item>
                  </vector>
                 </coordinates>
                </fractional>
                <uncertain_value type="UncertainValue" >
                 <value type="float" >1</value>
                 <uncertainty type="Uncertainty" >
                  <precision type="int" >0</precision>
                  <uncertainty type="int" >0</uncertainty>
                 </uncertainty>
                </uncertain_value>
                <uncertainty type="Handle" >
                 <serial_number type="int" >135</serial_number>
                 <value type="Container" >
                  <count type="int" >3</count>
                  <item type="Uncertainty" >
                   <precision type="int" >4</precision>
                   <uncertainty type="int" >0</uncertainty>
                  </item>
                  <item type="Uncertainty" >
                   <precision type="int" >4</precision>
                   <uncertainty type="int" >0</uncertainty>
                  </item>
                  <item type="Uncertainty" >
                   <precision type="int" >4</precision>
                   <uncertainty type="int" >0</uncertainty>
                  </item>
                 </value>
                </uncertainty>
                <adps type="Handle" >
                 <serial_number type="int" >136</serial_number>
                 <value type="AtomicDisplacementParameters" >
                  <uvalues type="Container" >
                   <count type="int" >6</count>
                   <item type="UncertainValue" >
                    <value type="float" >0.030999999999999996</value>
                    <uncertainty type="Uncertainty" >
                     <precision type="int" >1000000</precision>
                     <uncertainty type="int" >0</uncertainty>
                    </uncertainty>
                   </item>
                   <item type="UncertainValue" >
                    <value type="float" >0.031</value>
                    <uncertainty type="Uncertainty" >
                     <precision type="int" >1000000</precision>
                     <uncertainty type="int" >0</uncertainty>
                    </uncertainty>
                   </item>
                   <item type="UncertainValue" >
                    <value type="float" >0.03100000000000001</value>
                    <uncertainty type="Uncertainty" >
                     <precision type="int" >1000000</precision>
                     <uncertainty type="int" >0</uncertainty>
                    </uncertainty>
                   </item>
                   <item type="UncertainValue" >
                    <value type="float" >-2.0430667261182383e-18</value>
                    <uncertainty type="Uncertainty" >
                     <precision type="int" >1000000</precision>
                     <uncertainty type="int" >0</uncertainty>
                    </uncertainty>
                   </item>
                   <item type="UncertainValue" >
                    <value type="float" >0.0022757800669539201</value>
                    <uncertainty type="Uncertainty" >
                     <precision type="int" >1000000</precision>
                     <uncertainty type="int" >0</uncertainty>
                    </uncertainty>
                   </item>
                   <item type="UncertainValue" >
                    <value type="float" >-2.043066726118238e-18</value>
                    <uncertainty type="Uncertainty" >
                     <precision type="int" >1000000</precision>
                     <uncertainty type="int" >0</uncertainty>
                    </uncertainty>
                   </item>
                  </uvalues>
                  <type type="AtomicDisplacementParameters::Type" >
                   <enumerator type="int" >1</enumerator>
                  </type>
                  <u_equivalent type="float" >0.031</u_equivalent>
                 </value>
                </adps>
               </value>
              </site>
              <annotations type="Annotations" >
               <annotations type="Container" >
                <count type="int" >1</count>
                <item type="Handle" >
                 <serial_number type="int" >137</serial_number>
                 <value type="FileOrdering" >
                  <value type="Handle" >
                   <serial_number type="int" >138</serial_number>
                   <value type="FileOrdering" >
                    <file_order type="int" >21</file_order>
                   </value>
                  </value>
                 </value>
                </item>
               </annotations>
              </annotations>
             </value>
            </item>
            <item type="Handle" >
             <serial_number type="int" >139</serial_number>
             <value type="Atom3d" >
              <element type="Element" >
               <code type="char" >2</code>
              </element>
              <formal_charge type="int" >0</formal_charge>
              <radius type="float" >0.23000000000000001</radius>
              <label type="string" >H7C</label>
              <site type="Handle" >
               <serial_number type="int" >140</serial_number>
               <value type="Site" >
                <orthogonal type="Point" >
                 <coordinates type="Vector" >
                  <vector type="Container" >
                   <count type="int" >3</count>
                   <item type="float" >-3.1485508987460147</item>
                   <item type="float" >4.7151073200000004</item>
                   <item type="float" >1.6542838347927491</item>
                  </vector>
                 </coordinates>
                </orthogonal>
                <fractional type="Point" >
                 <coordinates type="Vector" >
                  <vector type="Container" >
                   <count type="int" >3</count>
                   <item type="float" >-0.30709999999999998</item>
                   <item type="float" >0.64680000000000004</item>
                   <item type="float" >0.066299999999999998</item>
                  </vector>
                 </coordinates>
                </fractional>
                <uncertain_value type="UncertainValue" >
                 <value type="float" >1</value>
                 <uncertainty type="Uncertainty" >
                  <precision type="int" >0</precision>
                  <uncertainty type="int" >0</uncertainty>
                 </uncertainty>
                </uncertain_value>
                <uncertainty type="Handle" >
                 <serial_number type="int" >141</serial_number>
                 <value type="Container" >
                  <count type="int" >3</count>
                  <item type="Uncertainty" >
                   <precision type="int" >4</precision>
                   <uncertainty type="int" >0</uncertainty>
                  </item>
                  <item type="Uncertainty" >
                   <precision type="int" >4</precision>
                   <uncertainty type="int" >0</uncertainty>
                  </item>
                  <item type="Uncertainty" >
                   <precision type="int" >4</precision>
                   <uncertainty type="int" >0</uncertainty>
                  </item>
                 </value>
                </uncertainty>
                <adps type="Handle" >
                 <serial_number type="int" >142</serial_number>
                 <value type="AtomicDisplacementParameters" >
                  <uvalues type="Container" >
                   <count type="int" >6</count>
                   <item type="UncertainValue" >
                    <value type="float" >0.030999999999999996</value>
                    <uncertainty type="Uncertainty" >
                     <precision type="int" >1000000</precision>
                     <uncertainty type="int" >0</uncertainty>
                    </uncertainty>
                   </item>
                   <item type="UncertainValue" >
                    <value type="float" >0.031</value>
                    <uncertainty type="Uncertainty" >
                     <precision type="int" >1000000</precision>
                     <uncertainty type="int" >0</uncertainty>
                    </uncertainty>
                   </item>
                   <item type="UncertainValue" >
                    <value type="float" >0.03100000000000001</value>
                    <uncertainty type="Uncertainty" >
                     <precision type="int" >1000000</precision>
                     <uncertainty type="int" >0</uncertainty>
                    </uncertainty>
                   </item>
                   <item type="UncertainValue" >
                    <value type="float" >-2.0430667261182383e-18</value>
                    <uncertainty type="Uncertainty" >
                     <precision type="int" >1000000</precision>
                     <uncertainty type="int" >0</uncertainty>
                    </uncertainty>
                   </item>
                   <item type="UncertainValue" >
                    <value type="float" >0.0022757800669539201</value>
                    <uncertainty type="Uncertainty" >
                     <precision type="int" >1000000</precision>
                     <uncertainty type="int" >0</uncertainty>
                    </uncertainty>
                   </item>
                   <item type="UncertainValue" >
                    <value type="float" >-2.043066726118238e-18</value>
                    <uncertainty type="Uncertainty" >
                     <precision type="int" >1000000</precision>
                     <uncertainty type="int" >0</uncertainty>
                    </uncertainty>
                   </item>
                  </uvalues>
                  <type type="AtomicDisplacementParameters::Type" >
                   <enumerator type="int" >1</enumerator>
                  </type>
                  <u_equivalent type="float" >0.031</u_equivalent>
                 </value>
                </adps>
               </value>
              </site>
              <annotations type="Annotations" >
               <annotations type="Container" >
                <count type="int" >1</count>
                <item type="Handle" >
                 <serial_number type="int" >143</serial_number>
                 <value type="FileOrdering" >
                  <value type="Handle" >
                   <serial_number type="int" >144</serial_number>
                   <value type="FileOrdering" >
                    <file_order type="int" >22</file_order>
                   </value>
                  </value>
                 </value>
                </item>
               </annotations>
              </annotations>
             </value>
            </item>
            <item type="Handle" >
             <serial_number type="int" >145</serial_number>
             <value type="Atom3d" >
              <element type="Element" >
               <code type="char" >1</code>
              </element>
              <formal_charge type="int" >0</formal_charge>
              <radius type="float" >0.68000000000000005</radius>
              <label type="string" >C8</label>
              <site type="Handle" >
               <serial_number type="int" >146</serial_number>
               <value type="Site" >
                <orthogonal type="Point" >
                 <coordinates type="Vector" >
                  <vector type="Container" >
                   <count type="int" >3</count>
                   <item type="float" >0.62531670982289322</item>
                   <item type="float" >5.4665502120000005</item>
                   <item type="float" >2.6316337263286762</item>
                  </vector>
                 </coordinates>
                </orthogonal>
                <fractional type="Point" >
                 <coordinates type="Vector" >
                  <vector type="Container" >
                   <count type="int" >3</count>
                   <item type="float" >0.083099999999999993</item>
                   <item type="float" >0.74987999999999999</item>
                   <item type="float" >0.10546999999999999</item>
                  </vector>
                 </coordinates>
                </fractional>
                <uncertain_value type="UncertainValue" >
                 <value type="float" >1</value>
                 <uncertainty type="Uncertainty" >
                  <precision type="int" >0</precision>
                  <uncertainty type="int" >0</uncertainty>
                 </uncertainty>
                </uncertain_value>
                <uncertainty type="Handle" >
                 <serial_number type="int" >147</serial_number>
                 <value type="Container" >
                  <count type="int" >3</count>
                  <item type="Uncertainty" >
                   <precision type="int" >5</precision>
                   <uncertainty type="int" >10</uncertainty>
                  </item>
                  <item type="Uncertainty" >
                   <precision type="int" >5</precision>
                   <uncertainty type="int" >13</uncertainty>
                  </item>
                  <item type="Uncertainty" >
                   <precision type="int" >5</precision>
                   <uncertainty type="int" >4</uncertainty>
                  </item>
                 </value>
                </uncertainty>
                <adps type="Handle" >
                 <serial_number type="int" >148</serial_number>
                 <value type="AtomicDisplacementParameters" >
                  <uvalues type="Container" >
                   <count type="int" >6</count>
                   <item type="UncertainValue" >
                    <value type="float" >0.014200000000000001</value>
                    <uncertainty type="Uncertainty" >
                     <precision type="int" >4</precision>
                     <uncertainty type="int" >4</uncertainty>
                    </uncertainty>
                   </item>
                   <item type="UncertainValue" >
                    <value type="float" >0.0155</value>
                    <uncertainty type="Uncertainty" >
                     <precision type="int" >4</precision>
                     <uncertainty type="int" >4</uncertainty>
                    </uncertainty>
                   </item>
                   <item type="UncertainValue" >
                    <value type="float" >0.014800000000000001</value>
                    <uncertainty type="Uncertainty" >
                     <precision type="int" >4</precision>
                     <uncertainty type="int" >4</uncertainty>
                    </uncertainty>
                   </item>
                   <item type="UncertainValue" >
                    <value type="float" >0.00089999999999999998</value>
                    <uncertainty type="Uncertainty" >
                     <precision type="int" >4</precision>
                     <uncertainty type="int" >3</uncertainty>
                    </uncertainty>
                   </item>
                   <item type="UncertainValue" >
                    <value type="float" >0.0016999999999999999</value>
                    <uncertainty type="Uncertainty" >
                     <precision type="int" >4</precision>
                     <uncertainty type="int" >3</uncertainty>
                    </uncertainty>
                   </item>
                   <item type="UncertainValue" >
                    <value type="float" >0.00040000000000000002</value>
                    <uncertainty type="Uncertainty" >
                     <precision type="int" >4</precision>
                     <uncertainty type="int" >3</uncertainty>
                    </uncertainty>
                   </item>
                  </uvalues>
                  <type type="AtomicDisplacementParameters::Type" >
                   <enumerator type="int" >0</enumerator>
                  </type>
                  <u_equivalent type="float" >0.014802061382139768</u_equivalent>
                 </value>
                </adps>
               </value>
              </site>
              <annotations type="Annotations" >
               <annotations type="Container" >
                <count type="int" >1</count>
                <item type="Handle" >
                 <serial_number type="int" >149</serial_number>
                 <value type="FileOrdering" >
                  <value type="Handle" >
                   <serial_number type="int" >150</serial_number>
                   <value type="FileOrdering" >
                    <file_order type="int" >23</file_order>
                   </value>
                  </value>
                 </value>
                </item>
               </annotations>
              </annotations>
             </value>
            </item>
            <item type="Handle" >
             <serial_number type="int" >151</serial_number>
             <value type="Atom3d" >
              <element type="Element" >
               <code type="char" >1</code>
              </element>
              <formal_charge type="int" >0</formal_charge>
              <radius type="float" >0.68000000000000005</radius>
              <label type="string" >C9</label>
              <site type="Handle" >
               <serial_number type="int" >152</serial_number>
               <value type="Site" >
                <orthogonal type="Point" >
                 <coordinates type="Vector" >
                  <vector type="Container" >
                   <count type="int" >3</count>
                   <item type="float" >0.92262913136247049</item>
                   <item type="float" >4.1819240339999997</item>
                   <item type="float" >2.1555592833747448</item>
                  </vector>
                 </coordinates>
                </orthogonal>
                <fractional type="Point" >
                 <coordinates type="Vector" >
                  <vector type="Container" >
                   <count type="int" >3</count>
                   <item type="float" >0.10971</item>
                   <item type="float" >0.57365999999999995</item>
                   <item type="float" >0.086389999999999995</item>
                  </vector>
                 </coordinates>
                </fractional>
                <uncertain_value type="UncertainValue" >
                 <value type="float" >1</value>
                 <uncertainty type="Uncertainty" >
                  <precision type="int" >0</precision>
                  <uncertainty type="int" >0</uncertainty>
                 </uncertainty>
                </uncertain_value>
                <uncertainty type="Handle" >
                 <serial_number type="int" >153</serial_number>
                 <value type="Container" >
                  <count type="int" >3</count>
                  <item type="Uncertainty" >
                   <precision type="int" >5</precision>
                   <uncertainty type="int" >10</uncertainty>
                  </item>
                  <item type="Uncertainty" >
                   <precision type="int" >5</precision>
                   <uncertainty type="int" >13</uncertainty>
                  </item>
                  <item type="Uncertainty" >
                   <precision type="int" >5</precision>
                   <uncertainty type="int" >4</uncertainty>
                  </item>
                 </value>
                </uncertainty>
                <adps type="Handle" >
                 <serial_number type="int" >154</serial_number>
                 <value type="AtomicDisplacementParameters" >
                  <uvalues type="Container" >
                   <count type="int" >6</count>
                   <item type="UncertainValue" >
                    <value type="float" >0.0184</value>
                    <uncertainty type="Uncertainty" >
                     <precision type="int" >4</precision>
                     <uncertainty type="int" >5</uncertainty>
                    </uncertainty>
                   </item>
                   <item type="UncertainValue" >
                    <value type="float" >0.015800000000000002</value>
                    <uncertainty type="Uncertainty" >
                     <precision type="int" >4</precision>
                     <uncertainty type="int" >4</uncertainty>
                    </uncertainty>
                   </item>
                   <item type="UncertainValue" >
                    <value type="float" >0.017399999999999999</value>
                    <uncertainty type="Uncertainty" >
                     <precision type="int" >4</precision>
                     <uncertainty type="int" >4</uncertainty>
                    </uncertainty>
                   </item>
                   <item type="UncertainValue" >
                    <value type="float" >-0.001</value>
                    <uncertainty type="Uncertainty" >
                     <precision type="int" >4</precision>
                     <uncertainty type="int" >4</uncertainty>
                    </uncertainty>
                   </item>
                   <item type="UncertainValue" >
                    <value type="float" >0.0011999999999999999</value>
                    <uncertainty type="Uncertainty" >
                     <precision type="int" >4</precision>
                     <uncertainty type="int" >3</uncertainty>
                    </uncertainty>
                   </item>
                   <item type="UncertainValue" >
                    <value type="float" >-0.0014</value>
                    <uncertainty type="Uncertainty" >
                     <precision type="int" >4</precision>
                     <uncertainty type="int" >3</uncertainty>
                    </uncertainty>
                   </item>
                  </uvalues>
                  <type type="AtomicDisplacementParameters::Type" >
                   <enumerator type="int" >0</enumerator>
                  </type>
                  <u_equivalent type="float" >0.017205613473601864</u_equivalent>
                 </value>
                </adps>
               </value>
              </site>
              <annotations type="Annotations" >
               <annotations type="Container" >
                <count type="int" >1</count>
                <item type="Handle" >
                 <serial_number type="int" >155</serial_number>
                 <value type="FileOrdering" >
                  <value type="Handle" >
                   <serial_number type="int" >156</serial_number>
                   <value type="FileOrdering" >
                    <file_order type="int" >24</file_order>
                   </value>
                  </value>
                 </value>
                </item>
               </annotations>
              </annotations>
             </value>
            </item>
            <item type="Handle" >
             <serial_number type="int" >157</serial_number>
             <value type="Atom3d" >
              <element type="Element" >
               <code type="char" >2</code>
              </element>
              <formal_charge type="int" >0</formal_charge>
              <radius type="float" >0.23000000000000001</radius>
              <label type="string" >H9</label>
              <site type="Handle" >
               <serial_number type="int" >158</serial_number>
               <value type="Site" >
                <orthogonal type="Point" >
                 <coordinates type="Vector" >
                  <vector type="Container" >
                   <count type="int" >3</count>
                   <item type="float" >0.34823641834831226</item>
                   <item type="float" >3.7688783000000003</item>
                   <item type="float" >1.5220409339722125</item>
                  </vector>
                 </coordinates>
                </orthogonal>
                <fractional type="Point" >
                 <coordinates type="Vector" >
                  <vector type="Container" >
                   <count type="int" >3</count>
                   <item type="float" >0.046699999999999998</item>
                   <item type="float" >0.51700000000000002</item>
                   <item type="float" >0.060999999999999999</item>
                  </vector>
                 </coordinates>
                </fractional>
                <uncertain_value type="UncertainValue" >
                 <value type="float" >1</value>
                 <uncertainty type="Uncertainty" >
                  <precision type="int" >0</precision>
                  <uncertainty type="int" >0</uncertainty>
                 </uncertainty>
                </uncertain_value>
                <uncertainty type="Handle" >
                 <serial_number type="int" >159</serial_number>
                 <value type="Container" >
                  <count type="int" >3</count>
                  <item type="Uncertainty" >
                   <precision type="int" >4</precision>
                   <uncertainty type="int" >0</uncertainty>
                  </item>
                  <item type="Uncertainty" >
                   <precision type="int" >4</precision>
                   <uncertainty type="int" >0</uncertainty>
                  </item>
                  <item type="Uncertainty" >
                   <precision type="int" >4</precision>
                   <uncertainty type="int" >0</uncertainty>
                  </item>
                 </value>
                </uncertainty>
                <adps type="Handle" >
                 <serial_number type="int" >160</serial_number>
                 <value type="AtomicDisplacementParameters" >
                  <uvalues type="Container" >
                   <count type="int" >6</count>
                   <item type="UncertainValue" >
                    <value type="float" >0.021000000000000005</value>
                    <uncertainty type="Uncertainty" >
                     <precision type="int" >1000000</precision>
                     <uncertainty type="int" >0</uncertainty>
                    </uncertainty>
                   </item>
                   <item type="UncertainValue" >
                    <value type="float" >0.021000000000000008</value>
                    <uncertainty type="Uncertainty" >
                     <precision type="int" >1000000</precision>
                     <uncertainty type="int" >0</uncertainty>
                    </uncertainty>
                   </item>
                   <item type="UncertainValue" >
                    <value type="float" >0.021000000000000005</value>
                    <uncertainty type="Uncertainty" >
                     <precision type="int" >1000000</precision>
                     <uncertainty type="int" >0</uncertainty>
                    </uncertainty>
                   </item>
                   <item type="UncertainValue" >
                    <value type="float" >-1.3840129434994521e-18</value>
                    <uncertainty type="Uncertainty" >
                     <precision type="int" >1000000</precision>
                     <uncertainty type="int" >0</uncertainty>
                    </uncertainty>
                   </item>
                   <item type="UncertainValue" >
                    <value type="float" >0.0015416574647107203</value>
                    <uncertainty type="Uncertainty" >
                     <precision type="int" >1000000</precision>
                     <uncertainty type="int" >0</uncertainty>
                    </uncertainty>
                   </item>
                   <item type="UncertainValue" >
                    <value type="float" >-1.3840129434994517e-18</value>
                    <uncertainty type="Uncertainty" >
                     <precision type="int" >1000000</precision>
                     <uncertainty type="int" >0</uncertainty>
                    </uncertainty>
                   </item>
                  </uvalues>
                  <type type="AtomicDisplacementParameters::Type" >
                   <enumerator type="int" >1</enumerator>
                  </type>
                  <u_equivalent type="float" >0.021000000000000001</u_equivalent>
                 </value>
                </adps>
               </value>
              </site>
              <annotations type="Annotations" >
               <annotations type="Container" >
                <count type="int" >1</count>
                <item type="Handle" >
                 <serial_number type="int" >161</serial_number>
                 <value type="FileOrdering" >
                  <value type="Handle" >
                   <serial_number type="int" >162</serial_number>
                   <value type="FileOrdering" >
                    <file_order type="int" >25</file_order>
                   </value>
                  </value>
                 </value>
                </item>
               </annotations>
              </annotations>
             </value>
            </item>
            <item type="Handle" >
             <serial_number type="int" >163</serial_number>
             <value type="Atom3d" >
              <element type="Element" >
               <code type="char" >1</code>
              </element>
              <formal_charge type="int" >0</formal_charge>
              <radius type="float" >0.68000000000000005</radius>
              <label type="string" >C10</label>
              <site type="Handle" >
               <serial_number type="int" >164</serial_number>
               <value type="Site" >
                <orthogonal type="Point" >
                 <coordinates type="Vector" >
                  <vector type="Container" >
                   <count type="int" >3</count>
                   <item type="float" >2.0485104553220714</item>
                   <item type="float" >3.5116906280000002</item>
                   <item type="float" >2.6036880567213179</item>
                  </vector>
                 </coordinates>
                </orthogonal>
                <fractional type="Point" >
                 <coordinates type="Vector" >
                  <vector type="Container" >
                   <count type="int" >3</count>
                   <item type="float" >0.22728999999999999</item>
                   <item type="float" >0.48171999999999998</item>
                   <item type="float" >0.10435</item>
                  </vector>
                 </coordinates>
                </fractional>
                <uncertain_value type="UncertainValue" >
                 <value type="float" >1</value>
                 <uncertainty type="Uncertainty" >
                  <precision type="int" >0</precision>
                  <uncertainty type="int" >0</uncertainty>
                 </uncertainty>
                </uncertain_value>
                <uncertainty type="Handle" >
                 <serial_number type="int" >165</serial_number>
                 <value type="Container" >
                  <count type="int" >3</count>
                  <item type="Uncertainty" >
                   <precision type="int" >5</precision>
                   <uncertainty type="int" >11</uncertainty>
                  </item>
                  <item type="Uncertainty" >
                   <precision type="int" >5</precision>
                   <uncertainty type="int" >13</uncertainty>
                  </item>
                  <item type="Uncertainty" >
                   <precision type="int" >5</precision>
                   <uncertainty type="int" >4</uncertainty>
                  </item>
                 </value>
                </uncertainty>
                <adps type="Handle" >
                 <serial_number type="int" >166</serial_number>
                 <value type="AtomicDisplacementParameters" >
                  <uvalues type="Container" >
                   <count type="int" >6</count>
                   <item type="UncertainValue" >
                    <value type="float" >0.020799999999999999</value>
                    <uncertainty type="Uncertainty" >
                     <precision type="int" >4</precision>
                     <uncertainty type="int" >5</uncertainty>
                    </uncertainty>
                   </item>
                   <item type="UncertainValue" >
                    <value type="float" >0.0135</value>
                    <uncertainty type="Uncertainty" >
                     <precision type="int" >4</precision>
                     <uncertainty type="int" >4</uncertainty>
                    </uncertainty>
                   </item>
                   <item type="UncertainValue" >
                    <value type="float" >0.0201</value>
                    <uncertainty type="Uncertainty" >
                     <precision type="int" >4</precision>
                     <uncertainty type="int" >5</uncertainty>
                    </uncertainty>
                   </item>
                   <item type="UncertainValue" >
                    <value type="float" >0.0018</value>
                    <uncertainty type="Uncertainty" >
                     <precision type="int" >4</precision>
                     <uncertainty type="int" >4</uncertainty>
                    </uncertainty>
                   </item>
                   <item type="UncertainValue" >
                    <value type="float" >0.0033</value>
                    <uncertainty type="Uncertainty" >
                     <precision type="int" >4</precision>
                     <uncertainty type="int" >4</uncertainty>
                    </uncertainty>
                   </item>
                   <item type="UncertainValue" >
                    <value type="float" >-0.0016000000000000001</value>
                    <uncertainty type="Uncertainty" >
                     <precision type="int" >4</precision>
                     <uncertainty type="int" >3</uncertainty>
                    </uncertainty>
                   </item>
                  </uvalues>
                  <type type="AtomicDisplacementParameters::Type" >
                   <enumerator type="int" >0</enumerator>
                  </type>
                  <u_equivalent type="float" >0.018044824294438908</u_equivalent>
                 </value>
                </adps>
               </value>
              </site>
              <annotations type="Annotations" >
               <annotations type="Container" >
                <count type="int" >1</count>
                <item type="Handle" >
                 <serial_number type="int" >167</serial_number>
                 <value type="FileOrdering" >
                  <value type="Handle" >
                   <serial_number type="int" >168</serial_number>
                   <value type="FileOrdering" >
                    <file_order type="int" >26</file_order>
                   </value>
                  </value>
                 </value>
                </item>
               </annotations>
              </annotations>
             </value>
            </item>
            <item type="Handle" >
             <serial_number type="int" >169</serial_number>
             <value type="Atom3d" >
              <element type="Element" >
               <code type="char" >2</code>
              </element>
              <formal_charge type="int" >0</formal_charge>
              <radius type="float" >0.23000000000000001</radius>
              <label type="string" >H10</label>
              <site type="Handle" >
               <serial_number type="int" >170</serial_number>
               <value type="Site" >
                <orthogonal type="Point" >
                 <coordinates type="Vector" >
                  <vector type="Container" >
                   <count type="int" >3</count>
                   <item type="float" >2.2375405080578887</item>
                   <item type="float" >2.64185976</item>
                   <item type="float" >2.2730808046699766</item>
                  </vector>
                 </coordinates>
                </orthogonal>
                <fractional type="Point" >
                 <coordinates type="Vector" >
                  <vector type="Container" >
                   <count type="int" >3</count>
                   <item type="float" >0.24399999999999999</item>
                   <item type="float" >0.3624</item>
                   <item type="float" >0.0911</item>
                  </vector>
                 </coordinates>
                </fractional>
                <uncertain_value type="UncertainValue" >
                 <value type="float" >1</value>
                 <uncertainty type="Uncertainty" >
                  <precision type="int" >0</precision>
                  <uncertainty type="int" >0</uncertainty>
                 </uncertainty>
                </uncertain_value>
                <uncertainty type="Handle" >
                 <serial_number type="int" >171</serial_number>
                 <value type="Container" >
                  <count type="int" >3</count>
                  <item type="Uncertainty" >
                   <precision type="int" >4</precision>
                   <uncertainty type="int" >0</uncertainty>
                  </item>
                  <item type="Uncertainty" >
                   <precision type="int" >4</precision>
                   <uncertainty type="int" >0</uncertainty>
                  </item>
                  <item type="Uncertainty" >
                   <precision type="int" >4</precision>
                   <uncertainty type="int" >0</uncertainty>
                  </item>
                 </value>
                </uncertainty>
                <adps type="Handle" >
                 <serial_number type="int" >172</serial_number>
                 <value type="AtomicDisplacementParameters" >
                  <uvalues type="Container" >
                   <count type="int" >6</count>
                   <item type="UncertainValue" >
                    <value type="float" >0.021999999999999999</value>
                    <uncertainty type="Uncertainty" >
                     <precision type="int" >1000000</precision>
                     <uncertainty type="int" >0</uncertainty>
                    </uncertainty>
                   </item>
                   <item type="UncertainValue" >
                    <value type="float" >0.022000000000000006</value>
                    <uncertainty type="Uncertainty" >
                     <precision type="int" >1000000</precision>
                     <uncertainty type="int" >0</uncertainty>
                    </uncertainty>
                   </item>
                   <item type="UncertainValue" >
                    <value type="float" >0.022000000000000002</value>
                    <uncertainty type="Uncertainty" >
                     <precision type="int" >1000000</precision>
                     <uncertainty type="int" >0</uncertainty>
                    </uncertainty>
                   </item>
                   <item type="UncertainValue" >
                    <value type="float" >-1.4499183217613302e-18</value>
                    <uncertainty type="Uncertainty" >
                     <precision type="int" >1000000</precision>
                     <uncertainty type="int" >0</uncertainty>
                    </uncertainty>
                   </item>
                   <item type="UncertainValue" >
                    <value type="float" >0.0016150697249350402</value>
                    <uncertainty type="Uncertainty" >
                     <precision type="int" >1000000</precision>
                     <uncertainty type="int" >0</uncertainty>
                    </uncertainty>
                   </item>
                   <item type="UncertainValue" >
                    <value type="float" >-1.4499183217613302e-18</value>
                    <uncertainty type="Uncertainty" >
                     <precision type="int" >1000000</precision>
                     <uncertainty type="int" >0</uncertainty>
                    </uncertainty>
                   </item>
                  </uvalues>
                  <type type="AtomicDisplacementParameters::Type" >
                   <enumerator type="int" >1</enumerator>
                  </type>
                  <u_equivalent type="float" >0.021999999999999999</u_equivalent>
                 </value>
                </adps>
               </value>
              </site>
              <annotations type="Annotations" >
               <annotations type="Container" >
                <count type="int" >1</count>
                <item type="Handle" >
                 <serial_number type="int" >173</serial_number>
                 <value type="FileOrdering" >
                  <value type="Handle" >
                   <serial_number type="int" >174</serial_number>
                   <value type="FileOrdering" >
                    <file_order type="int" >27</file_order>
                   </value>
                  </value>
                 </value>
                </item>
               </annotations>
              </annotations>
             </value>
            </item>
            <item type="Handle" >
             <serial_number type="int" >175</serial_number>
             <value type="Atom3d" >
              <element type="Element" >
               <code type="char" >1</code>
              </element>
              <formal_charge type="int" >0</formal_charge>
              <radius type="float" >0.68000000000000005</radius>
              <label type="string" >C11</label>
              <site type="Handle" >
               <serial_number type="int" >176</serial_number>
               <value type="Site" >
                <orthogonal type="Point" >
                 <coordinates type="Vector" >
                  <vector type="Container" >
                   <count type="int" >3</count>
                   <item type="float" >2.9139394961665186</item>
                   <item type="float" >4.0977256889999998</item>
                   <item type="float" >3.5386204140317901</item>
                  </vector>
                 </coordinates>
                </orthogonal>
                <fractional type="Point" >
                 <coordinates type="Vector" >
                  <vector type="Container" >
                   <count type="int" >3</count>
                   <item type="float" >0.32207999999999998</item>
                   <item type="float" >0.56211</item>
                   <item type="float" >0.14182</item>
                  </vector>
                 </coordinates>
                </fractional>
                <uncertain_value type="UncertainValue" >
                 <value type="float" >1</value>
                 <uncertainty type="Uncertainty" >
                  <precision type="int" >0</precision>
                  <uncertainty type="int" >0</uncertainty>
                 </uncertainty>
                </uncertain_value>
                <uncertainty type="Handle" >
                 <serial_number type="int" >177</serial_number>
                 <value type="Container" >
                  <count type="int" >3</count>
                  <item type="Uncertainty" >
                   <precision type="int" >5</precision>
                   <uncertainty type="int" >10</uncertainty>
                  </item>
                  <item type="Uncertainty" >
                   <precision type="int" >5</precision>
                   <uncertainty type="int" >13</uncertainty>
                  </item>
                  <item type="Uncertainty" >
                   <precision type="int" >5</precision>
                   <uncertainty type="int" >4</uncertainty>
                  </item>
                 </value>
                </uncertainty>
                <adps type="Handle" >
                 <serial_number type="int" >178</serial_number>
                 <value type="AtomicDisplacementParameters" >
                  <uvalues type="Container" >
                   <count type="int" >6</count>
                   <item type="UncertainValue" >
                    <value type="float" >0.015900000000000001</value>
                    <uncertainty type="Uncertainty" >
                     <precision type="int" >4</precision>
                     <uncertainty type="int" >5</uncertainty>
                    </uncertainty>
                   </item>
                   <item type="UncertainValue" >
                    <value type="float" >0.0147</value>
                    <uncertainty type="Uncertainty" >
                     <precision type="int" >4</precision>
                     <uncertainty type="int" >4</uncertainty>
                    </uncertainty>
                   </item>
                   <item type="UncertainValue" >
                    <value type="float" >0.0178</value>
                    <uncertainty type="Uncertainty" >
                     <precision type="int" >4</precision>
                     <uncertainty type="int" >4</uncertainty>
                    </uncertainty>
                   </item>
                   <item type="UncertainValue" >
                    <value type="float" >0.0016999999999999999</value>
                    <uncertainty type="Uncertainty" >
                     <precision type="int" >4</precision>
                     <uncertainty type="int" >3</uncertainty>
                    </uncertainty>
                   </item>
                   <item type="UncertainValue" >
                    <value type="float" >0.0037000000000000002</value>
                    <uncertainty type="Uncertainty" >
                     <precision type="int" >4</precision>
                     <uncertainty type="int" >3</uncertainty>
                    </uncertainty>
                   </item>
                   <item type="UncertainValue" >
                    <value type="float" >0.0015</value>
                    <uncertainty type="Uncertainty" >
                     <precision type="int" >4</precision>
                     <uncertainty type="int" >3</uncertainty>
                    </uncertainty>
                   </item>
                  </uvalues>
                  <type type="AtomicDisplacementParameters::Type" >
                   <enumerator type="int" >0</enumerator>
                  </type>
                  <u_equivalent type="float" >0.016012137064581929</u_equivalent>
                 </value>
                </adps>
               </value>
              </site>
              <annotations type="Annotations" >
               <annotations type="Container" >
                <count type="int" >1</count>
                <item type="Handle" >
                 <serial_number type="int" >179</serial_number>
                 <value type="FileOrdering" >
                  <value type="Handle" >
                   <serial_number type="int" >180</serial_number>
                   <value type="FileOrdering" >
                    <file_order type="int" >28</file_order>
                   </value>
                  </value>
                 </value>
                </item>
               </annotations>
              </annotations>
             </value>
            </item>
            <item type="Handle" >
             <serial_number type="int" >181</serial_number>
             <value type="Atom3d" >
              <element type="Element" >
               <code type="char" >1</code>
              </element>
              <formal_charge type="int" >0</formal_charge>
              <radius type="float" >0.68000000000000005</radius>
              <label type="string" >C12</label>
              <site type="Handle" >
               <serial_number type="int" >182</serial_number>
               <value type="Site" >
                <orthogonal type="Point" >
                 <coordinates type="Vector" >
                  <vector type="Container" >
                   <count type="int" >3</count>
                   <item type="float" >4.0611306781907759</item>
                   <item type="float" >3.4021963300000007</item>
                   <item type="float" >4.0601065700976795</item>
                  </vector>
                 </coordinates>
                </orthogonal>
                <fractional type="Point" >
                 <coordinates type="Vector" >
                  <vector type="Container" >
                   <count type="int" >3</count>
                   <item type="float" >0.44236999999999999</item>
                   <item type="float" >0.4667</item>
                   <item type="float" >0.16272</item>
                  </vector>
                 </coordinates>
                </fractional>
                <uncertain_value type="UncertainValue" >
                 <value type="float" >1</value>
                 <uncertainty type="Uncertainty" >
                  <precision type="int" >0</precision>
                  <uncertainty type="int" >0</uncertainty>
                 </uncertainty>
                </uncertain_value>
                <uncertainty type="Handle" >
                 <serial_number type="int" >183</serial_number>
                 <value type="Container" >
                  <count type="int" >3</count>
                  <item type="Uncertainty" >
                   <precision type="int" >5</precision>
                   <uncertainty type="int" >11</uncertainty>
                  </item>
                  <item type="Uncertainty" >
                   <precision type="int" >5</precision>
                   <uncertainty type="int" >14</uncertainty>
                  </item>
                  <item type="Uncertainty" >
                   <precision type="int" >5</precision>
                   <uncertainty type="int" >4</uncertainty>
                  </item>
                 </value>
                </uncertainty>
                <adps type="Handle" >
                 <serial_number type="int" >184</serial_number>
                 <value type="AtomicDisplacementParameters" >
                  <uvalues type="Container" >
                   <count type="int" >6</count>
                   <item type="UncertainValue" >
                    <value type="float" >0.018599999999999998</value>
                    <uncertainty type="Uncertainty" >
                     <precision type="int" >4</precision>
                     <uncertainty type="int" >5</uncertainty>
                    </uncertainty>
                   </item>
                   <item type="UncertainValue" >
                    <value type="float" >0.015599999999999999</value>
                    <uncertainty type="Uncertainty" >
                     <precision type="int" >4</precision>
                     <uncertainty type="int" >4</uncertainty>
                    </uncertainty>
                   </item>
                   <item type="UncertainValue" >
                    <value type="float" >0.026200000000000001</value>
                    <uncertainty type="Uncertainty" >
                     <precision type="int" >4</precision>
                     <uncertainty type="int" >5</uncertainty>
                    </uncertainty>
                   </item>
                   <item type="UncertainValue" >
                    <value type="float" >0.0037000000000000002</value>
                    <uncertainty type="Uncertainty" >
                     <precision type="int" >4</precision>
                     <uncertainty type="int" >4</uncertainty>
                    </uncertainty>
                   </item>
                   <item type="UncertainValue" >
                    <value type="float" >0.0045999999999999999</value>
                    <uncertainty type="Uncertainty" >
                     <precision type="int" >4</precision>
                     <uncertainty type="int" >4</uncertainty>
                    </uncertainty>
                   </item>
                   <item type="UncertainValue" >
                    <value type="float" >0.0025000000000000001</value>
                    <uncertainty type="Uncertainty" >
                     <precision type="int" >4</precision>
                     <uncertainty type="int" >4</uncertainty>
                    </uncertainty>
                   </item>
                  </uvalues>
                  <type type="AtomicDisplacementParameters::Type" >
                   <enumerator type="int" >0</enumerator>
                  </type>
                  <u_equivalent type="float" >0.019987899716473721</u_equivalent>
                 </value>
                </adps>
               </value>
              </site>
              <annotations type="Annotations" >
               <annotations type="Container" >
                <count type="int" >1</count>
                <item type="Handle" >
                 <serial_number type="int" >185</serial_number>
                 <value type="FileOrdering" >
                  <value type="Handle" >
                   <serial_number type="int" >186</serial_number>
                   <value type="FileOrdering" >
                    <file_order type="int" >29</file_order>
                   </value>
                  </value>
                 </value>
                </item>
               </annotations>
              </annotations>
             </value>
            </item>
            <item type="Handle" >
             <serial_number type="int" >187</serial_number>
             <value type="Atom3d" >
              <element type="Element" >
               <code type="char" >2</code>
              </element>
              <formal_charge type="int" >0</formal_charge>
              <radius type="float" >0.23000000000000001</radius>
              <label type="string" >H12</label>
              <site type="Handle" >
               <serial_number type="int" >188</serial_number>
               <value type="Site" >
                <orthogonal type="Point" >
                 <coordinates type="Vector" >
                  <vector type="Container" >
                   <count type="int" >3</count>
                   <item type="float" >4.2668742797525816</item>
                   <item type="float" >2.5339692400000007</item>
                   <item type="float" >3.7327430118400495</item>
                  </vector>
                 </coordinates>
                </orthogonal>
                <fractional type="Point" >
                 <coordinates type="Vector" >
                  <vector type="Container" >
                   <count type="int" >3</count>
                   <item type="float" >0.46079999999999999</item>
                   <item type="float" >0.34760000000000002</item>
                   <item type="float" >0.14960000000000001</item>
                  </vector>
                 </coordinates>
                </fractional>
                <uncertain_value type="UncertainValue" >
                 <value type="float" >1</value>
                 <uncertainty type="Uncertainty" >
                  <precision type="int" >0</precision>
                  <uncertainty type="int" >0</uncertainty>
                 </uncertainty>
                </uncertain_value>
                <uncertainty type="Handle" >
                 <serial_number type="int" >189</serial_number>
                 <value type="Container" >
                  <count type="int" >3</count>
                  <item type="Uncertainty" >
                   <precision type="int" >4</precision>
                   <uncertainty type="int" >0</uncertainty>
                  </item>
                  <item type="Uncertainty" >
                   <precision type="int" >4</precision>
                   <uncertainty type="int" >0</uncertainty>
                  </item>
                  <item type="Uncertainty" >
                   <precision type="int" >4</precision>
                   <uncertainty type="int" >0</uncertainty>
                  </item>
                 </value>
                </uncertainty>
                <adps type="Handle" >
                 <serial_number type="int" >190</serial_number>
                 <value type="AtomicDisplacementParameters" >
                  <uvalues type="Container" >
                   <count type="int" >6</count>
                   <item type="UncertainValue" >
                    <value type="float" >0.024</value>
                    <uncertainty type="Uncertainty" >
                     <precision type="int" >1000000</precision>
                     <uncertainty type="int" >0</uncertainty>
                    </uncertainty>
                   </item>
                   <item type="UncertainValue" >
                    <value type="float" >0.024000000000000007</value>
                    <uncertainty type="Uncertainty" >
                     <precision type="int" >1000000</precision>
                     <uncertainty type="int" >0</uncertainty>
                    </uncertainty>
                   </item>
                   <item type="UncertainValue" >
                    <value type="float" >0.024000000000000004</value>
                    <uncertainty type="Uncertainty" >
                     <precision type="int" >1000000</precision>
                     <uncertainty type="int" >0</uncertainty>
                    </uncertainty>
                   </item>
                   <item type="UncertainValue" >
                    <value type="float" >-1.581729078285088e-18</value>
                    <uncertainty type="Uncertainty" >
                     <precision type="int" >1000000</precision>
                     <uncertainty type="int" >0</uncertainty>
                    </uncertainty>
                   </item>
                   <item type="UncertainValue" >
                    <value type="float" >0.0017618942453836801</value>
                    <uncertainty type="Uncertainty" >
                     <precision type="int" >1000000</precision>
                     <uncertainty type="int" >0</uncertainty>
                    </uncertainty>
                   </item>
                   <item type="UncertainValue" >
                    <value type="float" >-1.5817290782850876e-18</value>
                    <uncertainty type="Uncertainty" >
                     <precision type="int" >1000000</precision>
                     <uncertainty type="int" >0</uncertainty>
                    </uncertainty>
                   </item>
                  </uvalues>
                  <type type="AtomicDisplacementParameters::Type" >
                   <enumerator type="int" >1</enumerator>
                  </type>
                  <u_equivalent type="float" >0.024</u_equivalent>
                 </value>
                </adps>
               </value>
              </site>
              <annotations type="Annotations" >
               <annotations type="Container" >
                <count type="int" >1</count>
                <item type="Handle" >
                 <serial_number type="int" >191</serial_number>
                 <value type="FileOrdering" >
                  <value type="Handle" >
                   <serial_number type="int" >192</serial_number>
                   <value type="FileOrdering" >
                    <file_order type="int" >30</file_order>
                   </value>
                  </value>
                 </value>
                </item>
               </annotations>
              </annotations>
             </value>
            </item>
            <item type="Handle" >
             <serial_number type="int" >193</serial_number>
             <value type="Atom3d" >
              <element type="Element" >
               <code type="char" >1</code>
              </element>
              <formal_charge type="int" >0</formal_charge>
              <radius type="float" >0.68000000000000005</radius>
              <label type="string" >C13</label>
              <site type="Handle" >
               <serial_number type="int" >194</serial_number>
               <value type="Site" >
                <orthogonal type="Point" >
                 <coordinates type="Vector" >
                  <vector type="Container" >
                   <count type="int" >3</count>
                   <item type="float" >4.8536858434328742</item>
                   <item type="float" >3.9577596090000005</item>
                   <item type="float" >5.006267098232537</item>
                  </vector>
                 </coordinates>
                </orthogonal>
                <fractional type="Point" >
                 <coordinates type="Vector" >
                  <vector type="Container" >
                   <count type="int" >3</count>
                   <item type="float" >0.52985000000000004</item>
                   <item type="float" >0.54291</item>
                   <item type="float" >0.20064000000000001</item>
                  </vector>
                 </coordinates>
                </fractional>
                <uncertain_value type="UncertainValue" >
                 <value type="float" >1</value>
                 <uncertainty type="Uncertainty" >
                  <precision type="int" >0</precision>
                  <uncertainty type="int" >0</uncertainty>
                 </uncertainty>
                </uncertain_value>
                <uncertainty type="Handle" >
                 <serial_number type="int" >195</serial_number>
                 <value type="Container" >
                  <count type="int" >3</count>
                  <item type="Uncertainty" >
                   <precision type="int" >5</precision>
                   <uncertainty type="int" >11</uncertainty>
                  </item>
                  <item type="Uncertainty" >
                   <precision type="int" >5</precision>
                   <uncertainty type="int" >14</uncertainty>
                  </item>
                  <item type="Uncertainty" >
                   <precision type="int" >5</precision>
                   <uncertainty type="int" >4</uncertainty>
                  </item>
                 </value>
                </uncertainty>
                <adps type="Handle" >
                 <serial_number type="int" >196</serial_number>
                 <value type="AtomicDisplacementParameters" >
                  <uvalues type="Container" >
                   <count type="int" >6</count>
                   <item type="UncertainValue" >
                    <value type="float" >0.016</value>
                    <uncertainty type="Uncertainty" >
                     <precision type="int" >4</precision>
                     <uncertainty type="int" >5</uncertainty>
                    </uncertainty>
                   </item>
                   <item type="UncertainValue" >
                    <value type="float" >0.018599999999999998</value>
                    <uncertainty type="Uncertainty" >
                     <precision type="int" >4</precision>
                     <uncertainty type="int" >5</uncertainty>
                    </uncertainty>
                   </item>
                   <item type="UncertainValue" >
                    <value type="float" >0.025499999999999998</value>
                    <uncertainty type="Uncertainty" >
                     <precision type="int" >4</precision>
                     <uncertainty type="int" >5</uncertainty>
                    </uncertainty>
                   </item>
                   <item type="UncertainValue" >
                    <value type="float" >0.0035999999999999999</value>
                    <uncertainty type="Uncertainty" >
                     <precision type="int" >4</precision>
                     <uncertainty type="int" >4</uncertainty>
                    </uncertainty>
                   </item>
                   <item type="UncertainValue" >
                    <value type="float" >0.0028999999999999998</value>
                    <uncertainty type="Uncertainty" >
                     <precision type="int" >4</precision>
                     <uncertainty type="int" >4</uncertainty>
                    </uncertainty>
                   </item>
                   <item type="UncertainValue" >
                    <value type="float" >0.0060000000000000001</value>
                    <uncertainty type="Uncertainty" >
                     <precision type="int" >4</precision>
                     <uncertainty type="int" >4</uncertainty>
                    </uncertainty>
                   </item>
                  </uvalues>
                  <type type="AtomicDisplacementParameters::Type" >
                   <enumerator type="int" >0</enumerator>
                  </type>
                  <u_equivalent type="float" >0.019965590686718524</u_equivalent>
                 </value>
                </adps>
               </value>
              </site>
              <annotations type="Annotations" >
               <annotations type="Container" >
                <count type="int" >1</count>
                <item type="Handle" >
                 <serial_number type="int" >197</serial_number>
                 <value type="FileOrdering" >
                  <value type="Handle" >
                   <serial_number type="int" >198</serial_number>
                   <value type="FileOrdering" >
                    <file_order type="int" >31</file_order>
                   </value>
                  </value>
                 </value>
                </item>
               </annotations>
              </annotations>
             </value>
            </item>
            <item type="Handle" >
             <serial_number type="int" >199</serial_number>
             <value type="Atom3d" >
              <element type="Element" >
               <code type="char" >2</code>
              </element>
              <formal_charge type="int" >0</formal_charge>
              <radius type="float" >0.23000000000000001</radius>
              <label type="string" >H13</label>
              <site type="Handle" >
               <serial_number type="int" >200</serial_number>
               <value type="Site" >
                <orthogonal type="Point" >
                 <coordinates type="Vector" >
                  <vector type="Container" >
                   <count type="int" >3</count>
                   <item type="float" >5.5878176330143949</item>
                   <item type="float" >3.4619735100000004</item>
                   <item type="float" >5.3495996105515147</item>
                  </vector>
                 </coordinates>
                </orthogonal>
                <fractional type="Point" >
                 <coordinates type="Vector" >
                  <vector type="Container" >
                   <count type="int" >3</count>
                   <item type="float" >0.6069</item>
                   <item type="float" >0.47489999999999999</item>
                   <item type="float" >0.21440000000000001</item>
                  </vector>
                 </coordinates>
                </fractional>
                <uncertain_value type="UncertainValue" >
                 <value type="float" >1</value>
                 <uncertainty type="Uncertainty" >
                  <precision type="int" >0</precision>
                  <uncertainty type="int" >0</uncertainty>
                 </uncertainty>
                </uncertain_value>
                <uncertainty type="Handle" >
                 <serial_number type="int" >201</serial_number>
                 <value type="Container" >
                  <count type="int" >3</count>
                  <item type="Uncertainty" >
                   <precision type="int" >4</precision>
                   <uncertainty type="int" >0</uncertainty>
                  </item>
                  <item type="Uncertainty" >
                   <precision type="int" >4</precision>
                   <uncertainty type="int" >0</uncertainty>
                  </item>
                  <item type="Uncertainty" >
                   <precision type="int" >4</precision>
                   <uncertainty type="int" >0</uncertainty>
                  </item>
                 </value>
                </uncertainty>
                <adps type="Handle" >
                 <serial_number type="int" >202</serial_number>
                 <value type="AtomicDisplacementParameters" >
                  <uvalues type="Container" >
                   <count type="int" >6</count>
                   <item type="UncertainValue" >
                    <value type="float" >0.024</value>
                    <uncertainty type="Uncertainty" >
                     <precision type="int" >1000000</precision>
                     <uncertainty type="int" >0</uncertainty>
                    </uncertainty>
                   </item>
                   <item type="UncertainValue" >
                    <value type="float" >0.024000000000000007</value>
                    <uncertainty type="Uncertainty" >
                     <precision type="int" >1000000</precision>
                     <uncertainty type="int" >0</uncertainty>
                    </uncertainty>
                   </item>
                   <item type="UncertainValue" >
                    <value type="float" >0.024000000000000004</value>
                    <uncertainty type="Uncertainty" >
                     <precision type="int" >1000000</precision>
                     <uncertainty type="int" >0</uncertainty>
                    </uncertainty>
                   </item>
                   <item type="UncertainValue" >
                    <value type="float" >-1.581729078285088e-18</value>
                    <uncertainty type="Uncertainty" >
                     <precision type="int" >1000000</precision>
                     <uncertainty type="int" >0</uncertainty>
                    </uncertainty>
                   </item>
                   <item type="UncertainValue" >
                    <value type="float" >0.0017618942453836801</value>
                    <uncertainty type="Uncertainty" >
                     <precision type="int" >1000000</precision>
                     <uncertainty type="int" >0</uncertainty>
                    </uncertainty>
                   </item>
                   <item type="UncertainValue" >
                    <value type="float" >-1.5817290782850876e-18</value>
                    <uncertainty type="Uncertainty" >
                     <precision type="int" >1000000</precision>
                     <uncertainty type="int" >0</uncertainty>
                    </uncertainty>
                   </item>
                  </uvalues>
                  <type type="AtomicDisplacementParameters::Type" >
                   <enumerator type="int" >1</enumerator>
                  </type>
                  <u_equivalent type="float" >0.024</u_equivalent>
                 </value>
                </adps>
               </value>
              </site>
              <annotations type="Annotations" >
               <annotations type="Container" >
                <count type="int" >1</count>
                <item type="Handle" >
                 <serial_number type="int" >203</serial_number>
                 <value type="FileOrdering" >
                  <value type="Handle" >
                   <serial_number type="int" >204</serial_number>
                   <value type="FileOrdering" >
                    <file_order type="int" >32</file_order>
                   </value>
                  </value>
                 </value>
                </item>
               </annotations>
              </annotations>
             </value>
            </item>
            <item type="Handle" >
             <serial_number type="int" >205</serial_number>
             <value type="Atom3d" >
              <element type="Element" >
               <code type="char" >1</code>
              </element>
              <formal_charge type="int" >0</formal_charge>
              <radius type="float" >0.68000000000000005</radius>
              <label type="string" >C14</label>
              <site type="Handle" >
               <serial_number type="int" >206</serial_number>
               <value type="Site" >
                <orthogonal type="Point" >
                 <coordinates type="Vector" >
                  <vector type="Container" >
                   <count type="int" >3</count>
                   <item type="float" >4.604127151996467</item>
                   <item type="float" >5.2851046010000005</item>
                   <item type="float" >5.4990590399694419</item>
                  </vector>
                 </coordinates>
                </orthogonal>
                <fractional type="Point" >
                 <coordinates type="Vector" >
                  <vector type="Container" >
                   <count type="int" >3</count>
                   <item type="float" >0.50821000000000005</item>
                   <item type="float" >0.72499000000000002</item>
                   <item type="float" >0.22039</item>
                  </vector>
                 </coordinates>
                </fractional>
                <uncertain_value type="UncertainValue" >
                 <value type="float" >1</value>
                 <uncertainty type="Uncertainty" >
                  <precision type="int" >0</precision>
                  <uncertainty type="int" >0</uncertainty>
                 </uncertainty>
                </uncertain_value>
                <uncertainty type="Handle" >
                 <serial_number type="int" >207</serial_number>
                 <value type="Container" >
                  <count type="int" >3</count>
                  <item type="Uncertainty" >
                   <precision type="int" >5</precision>
                   <uncertainty type="int" >10</uncertainty>
                  </item>
                  <item type="Uncertainty" >
                   <precision type="int" >5</precision>
                   <uncertainty type="int" >14</uncertainty>
                  </item>
                  <item type="Uncertainty" >
                   <precision type="int" >5</precision>
                   <uncertainty type="int" >4</uncertainty>
                  </item>
                 </value>
                </uncertainty>
                <adps type="Handle" >
                 <serial_number type="int" >208</serial_number>
                 <value type="AtomicDisplacementParameters" >
                  <uvalues type="Container" >
                   <count type="int" >6</count>
                   <item type="UncertainValue" >
                    <value type="float" >0.0146</value>
                    <uncertainty type="Uncertainty" >
                     <precision type="int" >4</precision>
                     <uncertainty type="int" >4</uncertainty>
                    </uncertainty>
                   </item>
                   <item type="UncertainValue" >
                    <value type="float" >0.018599999999999998</value>
                    <uncertainty type="Uncertainty" >
                     <precision type="int" >4</precision>
                     <uncertainty type="int" >5</uncertainty>
                    </uncertainty>
                   </item>
                   <item type="UncertainValue" >
                    <value type="float" >0.0166</value>
                    <uncertainty type="Uncertainty" >
                     <precision type="int" >4</precision>
                     <uncertainty type="int" >4</uncertainty>
                    </uncertainty>
                   </item>
                   <item type="UncertainValue" >
                    <value type="float" >-0.00040000000000000002</value>
                    <uncertainty type="Uncertainty" >
                     <precision type="int" >4</precision>
                     <uncertainty type="int" >3</uncertainty>
                    </uncertainty>
                   </item>
                   <item type="UncertainValue" >
                    <value type="float" >0.0030999999999999999</value>
                    <uncertainty type="Uncertainty" >
                     <precision type="int" >4</precision>
                     <uncertainty type="int" >3</uncertainty>
                    </uncertainty>
                   </item>
                   <item type="UncertainValue" >
                    <value type="float" >0.0040000000000000001</value>
                    <uncertainty type="Uncertainty" >
                     <precision type="int" >4</precision>
                     <uncertainty type="int" >3</uncertainty>
                    </uncertainty>
                   </item>
                  </uvalues>
                  <type type="AtomicDisplacementParameters::Type" >
                   <enumerator type="int" >0</enumerator>
                  </type>
                  <u_equivalent type="float" >0.016503812282128171</u_equivalent>
                 </value>
                </adps>
               </value>
              </site>
              <annotations type="Annotations" >
               <annotations type="Container" >
                <count type="int" >1</count>
                <item type="Handle" >
                 <serial_number type="int" >209</serial_number>
                 <value type="FileOrdering" >
                  <value type="Handle" >
                   <serial_number type="int" >210</serial_number>
                   <value type="FileOrdering" >
                    <file_order type="int" >33</file_order>
                   </value>
                  </value>
                 </value>
                </item>
               </annotations>
              </annotations>
             </value>
            </item>
            <item type="Handle" >
             <serial_number type="int" >211</serial_number>
             <value type="Atom3d" >
              <element type="Element" >
               <code type="char" >1</code>
              </element>
              <formal_charge type="int" >0</formal_charge>
              <radius type="float" >0.68000000000000005</radius>
              <label type="string" >C15</label>
              <site type="Handle" >
               <serial_number type="int" >212</serial_number>
               <value type="Site" >
                <orthogonal type="Point" >
                 <coordinates type="Vector" >
                  <vector type="Container" >
                   <count type="int" >3</count>
                   <item type="float" >5.4277543153952772</item>
                   <item type="float" >5.8880522300000004</item>
                   <item type="float" >6.4609390072584381</item>
                  </vector>
                 </coordinates>
                </orthogonal>
                <fractional type="Point" >
                 <coordinates type="Vector" >
                  <vector type="Container" >
                   <count type="int" >3</count>
                   <item type="float" >0.59896000000000005</item>
                   <item type="float" >0.80769999999999997</item>
                   <item type="float" >0.25894</item>
                  </vector>
                 </coordinates>
                </fractional>
                <uncertain_value type="UncertainValue" >
                 <value type="float" >1</value>
                 <uncertainty type="Uncertainty" >
                  <precision type="int" >0</precision>
                  <uncertainty type="int" >0</uncertainty>
                 </uncertainty>
                </uncertain_value>
                <uncertainty type="Handle" >
                 <serial_number type="int" >213</serial_number>
                 <value type="Container" >
                  <count type="int" >3</count>
                  <item type="Uncertainty" >
                   <precision type="int" >5</precision>
                   <uncertainty type="int" >11</uncertainty>
                  </item>
                  <item type="Uncertainty" >
                   <precision type="int" >5</precision>
                   <uncertainty type="int" >15</uncertainty>
                  </item>
                  <item type="Uncertainty" >
                   <precision type="int" >5</precision>
                   <uncertainty type="int" >4</uncertainty>
                  </item>
                 </value>
                </uncertainty>
                <adps type="Handle" >
                 <serial_number type="int" >214</serial_number>
                 <value type="AtomicDisplacementParameters" >
                  <uvalues type="Container" >
                   <count type="int" >6</count>
                   <item type="UncertainValue" >
                    <value type="float" >0.016199999999999999</value>
                    <uncertainty type="Uncertainty" >
                     <precision type="int" >4</precision>
                     <uncertainty type="int" >5</uncertainty>
                    </uncertainty>
                   </item>
                   <item type="UncertainValue" >
                    <value type="float" >0.025999999999999999</value>
                    <uncertainty type="Uncertainty" >
                     <precision type="int" >4</precision>
                     <uncertainty type="int" >5</uncertainty>
                    </uncertainty>
                   </item>
                   <item type="UncertainValue" >
                    <value type="float" >0.019599999999999999</value>
                    <uncertainty type="Uncertainty" >
                     <precision type="int" >4</precision>
                     <uncertainty type="int" >5</uncertainty>
                    </uncertainty>
                   </item>
                   <item type="UncertainValue" >
                    <value type="float" >0</value>
                    <uncertainty type="Uncertainty" >
                     <precision type="int" >4</precision>
                     <uncertainty type="int" >4</uncertainty>
                    </uncertainty>
                   </item>
                   <item type="UncertainValue" >
                    <value type="float" >-0.00050000000000000001</value>
                    <uncertainty type="Uncertainty" >
                     <precision type="int" >4</precision>
                     <uncertainty type="int" >4</uncertainty>
                    </uncertainty>
                   </item>
                   <item type="UncertainValue" >
                    <value type="float" >0.0051999999999999998</value>
                    <uncertainty type="Uncertainty" >
                     <precision type="int" >4</precision>
                     <uncertainty type="int" >4</uncertainty>
                    </uncertainty>
                   </item>
                  </uvalues>
                  <type type="AtomicDisplacementParameters::Type" >
                   <enumerator type="int" >0</enumerator>
                  </type>
                  <u_equivalent type="float" >0.020689264862635354</u_equivalent>
                 </value>
                </adps>
               </value>
              </site>
              <annotations type="Annotations" >
               <annotations type="Container" >
                <count type="int" >1</count>
                <item type="Handle" >
                 <serial_number type="int" >215</serial_number>
                 <value type="FileOrdering" >
                  <value type="Handle" >
                   <serial_number type="int" >216</serial_number>
                   <value type="FileOrdering" >
                    <file_order type="int" >34</file_order>
                   </value>
                  </value>
                 </value>
                </item>
               </annotations>
              </annotations>
             </value>
            </item>
            <item type="Handle" >
             <serial_number type="int" >217</serial_number>
             <value type="Atom3d" >
              <element type="Element" >
               <code type="char" >2</code>
              </element>
              <formal_charge type="int" >0</formal_charge>
              <radius type="float" >0.23000000000000001</radius>
              <label type="string" >H15</label>
              <site type="Handle" >
               <serial_number type="int" >218</serial_number>
               <value type="Site" >
                <orthogonal type="Point" >
                 <coordinates type="Vector" >
                  <vector type="Container" >
                   <count type="int" >3</count>
                   <item type="float" >6.1657971943075216</item>
                   <item type="float" >5.4069188300000013</item>
                   <item type="float" >6.8167472649378436</item>
                  </vector>
                 </coordinates>
                </orthogonal>
                <fractional type="Point" >
                 <coordinates type="Vector" >
                  <vector type="Container" >
                   <count type="int" >3</count>
                   <item type="float" >0.67649999999999999</item>
                   <item type="float" >0.74170000000000003</item>
                   <item type="float" >0.2732</item>
                  </vector>
                 </coordinates>
                </fractional>
                <uncertain_value type="UncertainValue" >
                 <value type="float" >1</value>
                 <uncertainty type="Uncertainty" >
                  <precision type="int" >0</precision>
                  <uncertainty type="int" >0</uncertainty>
                 </uncertainty>
                </uncertain_value>
                <uncertainty type="Handle" >
                 <serial_number type="int" >219</serial_number>
                 <value type="Container" >
                  <count type="int" >3</count>
                  <item type="Uncertainty" >
                   <precision type="int" >4</precision>
                   <uncertainty type="int" >0</uncertainty>
                  </item>
                  <item type="Uncertainty" >
                   <precision type="int" >4</precision>
                   <uncertainty type="int" >0</uncertainty>
                  </item>
                  <item type="Uncertainty" >
                   <precision type="int" >4</precision>
                   <uncertainty type="int" >0</uncertainty>
                  </item>
                 </value>
                </uncertainty>
                <adps type="Handle" >
                 <serial_number type="int" >220</serial_number>
                 <value type="AtomicDisplacementParameters" >
                  <uvalues type="Container" >
                   <count type="int" >6</count>
                   <item type="UncertainValue" >
                    <value type="float" >0.024999999999999998</value>
                    <uncertainty type="Uncertainty" >
                     <precision type="int" >1000000</precision>
                     <uncertainty type="int" >0</uncertainty>
                    </uncertainty>
                   </item>
                   <item type="UncertainValue" >
                    <value type="float" >0.025000000000000005</value>
                    <uncertainty type="Uncertainty" >
                     <precision type="int" >1000000</precision>
                     <uncertainty type="int" >0</uncertainty>
                    </uncertainty>
                   </item>
                   <item type="UncertainValue" >
                    <value type="float" >0.025000000000000008</value>
                    <uncertainty type="Uncertainty" >
                     <precision type="int" >1000000</precision>
                     <uncertainty type="int" >0</uncertainty>
                    </uncertainty>
                   </item>
                   <item type="UncertainValue" >
                    <value type="float" >-1.6476344565469667e-18</value>
                    <uncertainty type="Uncertainty" >
                     <precision type="int" >1000000</precision>
                     <uncertainty type="int" >0</uncertainty>
                    </uncertainty>
                   </item>
                   <item type="UncertainValue" >
                    <value type="float" >0.001835306505608</value>
                    <uncertainty type="Uncertainty" >
                     <precision type="int" >1000000</precision>
                     <uncertainty type="int" >0</uncertainty>
                    </uncertainty>
                   </item>
                   <item type="UncertainValue" >
                    <value type="float" >-1.6476344565469659e-18</value>
                    <uncertainty type="Uncertainty" >
                     <precision type="int" >1000000</precision>
                     <uncertainty type="int" >0</uncertainty>
                    </uncertainty>
                   </item>
                  </uvalues>
                  <type type="AtomicDisplacementParameters::Type" >
                   <enumerator type="int" >1</enumerator>
                  </type>
                  <u_equivalent type="float" >0.025000000000000001</u_equivalent>
                 </value>
                </adps>
               </value>
              </site>
              <annotations type="Annotations" >
               <annotations type="Container" >
                <count type="int" >1</count>
                <item type="Handle" >
                 <serial_number type="int" >221</serial_number>
                 <value type="FileOrdering" >
                  <value type="Handle" >
                   <serial_number type="int" >222</serial_number>
                   <value type="FileOrdering" >
                    <file_order type="int" >35</file_order>
                   </value>
                  </value>
                 </value>
                </item>
               </annotations>
              </annotations>
             </value>
            </item>
            <item type="Handle" >
             <serial_number type="int" >223</serial_number>
             <value type="Atom3d" >
              <element type="Element" >
               <code type="char" >1</code>
              </element>
              <formal_charge type="int" >0</formal_charge>
              <radius type="float" >0.68000000000000005</radius>
              <label type="string" >C16</label>
              <site type="Handle" >
               <serial_number type="int" >224</serial_number>
               <value type="Site" >
                <orthogonal type="Point" >
                 <coordinates type="Vector" >
                  <vector type="Container" >
                   <count type="int" >3</count>
                   <item type="float" >5.1745119528769141</item>
                   <item type="float" >7.1837590560000013</item>
                   <item type="float" >6.899336699223876</item>
                  </vector>
                 </coordinates>
                </orthogonal>
                <fractional type="Point" >
                 <coordinates type="Vector" >
                  <vector type="Container" >
                   <count type="int" >3</count>
                   <item type="float" >0.57654000000000005</item>
                   <item type="float" >0.98543999999999998</item>
                   <item type="float" >0.27650999999999998</item>
                  </vector>
                 </coordinates>
                </fractional>
                <uncertain_value type="UncertainValue" >
                 <value type="float" >1</value>
                 <uncertainty type="Uncertainty" >
                  <precision type="int" >0</precision>
                  <uncertainty type="int" >0</uncertainty>
                 </uncertainty>
                </uncertain_value>
                <uncertainty type="Handle" >
                 <serial_number type="int" >225</serial_number>
                 <value type="Container" >
                  <count type="int" >3</count>
                  <item type="Uncertainty" >
                   <precision type="int" >5</precision>
                   <uncertainty type="int" >11</uncertainty>
                  </item>
                  <item type="Uncertainty" >
                   <precision type="int" >5</precision>
                   <uncertainty type="int" >16</uncertainty>
                  </item>
                  <item type="Uncertainty" >
                   <precision type="int" >5</precision>
                   <uncertainty type="int" >4</uncertainty>
                  </item>
                 </value>
                </uncertainty>
                <adps type="Handle" >
                 <serial_number type="int" >226</serial_number>
                 <value type="AtomicDisplacementParameters" >
                  <uvalues type="Container" >
                   <count type="int" >6</count>
                   <item type="UncertainValue" >
                    <value type="float" >0.019300000000000001</value>
                    <uncertainty type="Uncertainty" >
                     <precision type="int" >4</precision>
                     <uncertainty type="int" >5</uncertainty>
                    </uncertainty>
                   </item>
                   <item type="UncertainValue" >
                    <value type="float" >0.027799999999999998</value>
                    <uncertainty type="Uncertainty" >
                     <precision type="int" >4</precision>
                     <uncertainty type="int" >5</uncertainty>
                    </uncertainty>
                   </item>
                   <item type="UncertainValue" >
                    <value type="float" >0.0161</value>
                    <uncertainty type="Uncertainty" >
                     <precision type="int" >4</precision>
                     <uncertainty type="int" >5</uncertainty>
                    </uncertainty>
                   </item>
                   <item type="UncertainValue" >
                    <value type="float" >-0.0037000000000000002</value>
                    <uncertainty type="Uncertainty" >
                     <precision type="int" >4</precision>
                     <uncertainty type="int" >4</uncertainty>
                    </uncertainty>
                   </item>
                   <item type="UncertainValue" >
                    <value type="float" >-0.00089999999999999998</value>
                    <uncertainty type="Uncertainty" >
                     <precision type="int" >4</precision>
                     <uncertainty type="int" >4</uncertainty>
                    </uncertainty>
                   </item>
                   <item type="UncertainValue" >
                    <value type="float" >0</value>
                    <uncertainty type="Uncertainty" >
                     <precision type="int" >4</precision>
                     <uncertainty type="int" >4</uncertainty>
                    </uncertainty>
                   </item>
                  </uvalues>
                  <type type="AtomicDisplacementParameters::Type" >
                   <enumerator type="int" >0</enumerator>
                  </type>
                  <u_equivalent type="float" >0.021174891734069914</u_equivalent>
                 </value>
                </adps>
               </value>
              </site>
              <annotations type="Annotations" >
               <annotations type="Container" >
                <count type="int" >1</count>
                <item type="Handle" >
                 <serial_number type="int" >227</serial_number>
                 <value type="FileOrdering" >
                  <value type="Handle" >
                   <serial_number type="int" >228</serial_number>
                   <value type="FileOrdering" >
                    <file_order type="int" >36</file_order>
                   </value>
                  </value>
                 </value>
                </item>
               </annotations>
              </annotations>
             </value>
            </item>
            <item type="Handle" >
             <serial_number type="int" >229</serial_number>
             <value type="Atom3d" >
              <element type="Element" >
               <code type="char" >2</code>
              </element>
              <formal_charge type="int" >0</formal_charge>
              <radius type="float" >0.23000000000000001</radius>
              <label type="string" >H16</label>
              <site type="Handle" >
               <serial_number type="int" >230</serial_number>
               <value type="Site" >
                <orthogonal type="Point" >
                 <coordinates type="Vector" >
                  <vector type="Container" >
                   <count type="int" >3</count>
                   <item type="float" >5.7421981749540869</item>
                   <item type="float" >7.5793090300000019</item>
                   <item type="float" >7.550321092131008</item>
                  </vector>
                 </coordinates>
                </orthogonal>
                <fractional type="Point" >
                 <coordinates type="Vector" >
                  <vector type="Container" >
                   <count type="int" >3</count>
                   <item type="float" >0.63900000000000001</item>
                   <item type="float" >1.0397000000000001</item>
                   <item type="float" >0.30259999999999998</item>
                  </vector>
                 </coordinates>
                </fractional>
                <uncertain_value type="UncertainValue" >
                 <value type="float" >1</value>
                 <uncertainty type="Uncertainty" >
                  <precision type="int" >0</precision>
                  <uncertainty type="int" >0</uncertainty>
                 </uncertainty>
                </uncertain_value>
                <uncertainty type="Handle" >
                 <serial_number type="int" >231</serial_number>
                 <value type="Container" >
                  <count type="int" >3</count>
                  <item type="Uncertainty" >
                   <precision type="int" >4</precision>
                   <uncertainty type="int" >0</uncertainty>
                  </item>
                  <item type="Uncertainty" >
                   <precision type="int" >4</precision>
                   <uncertainty type="int" >0</uncertainty>
                  </item>
                  <item type="Uncertainty" >
                   <precision type="int" >4</precision>
                   <uncertainty type="int" >0</uncertainty>
                  </item>
                 </value>
                </uncertainty>
                <adps type="Handle" >
                 <serial_number type="int" >232</serial_number>
                 <value type="AtomicDisplacementParameters" >
                  <uvalues type="Container" >
                   <count type="int" >6</count>
                   <item type="UncertainValue" >
                    <value type="float" >0.024999999999999998</value>
                    <uncertainty type="Uncertainty" >
                     <precision type="int" >1000000</precision>
                     <uncertainty type="int" >0</uncertainty>
                    </uncertainty>
                   </item>
                   <item type="UncertainValue" >
                    <value type="float" >0.025000000000000005</value>
                    <uncertainty type="Uncertainty" >
                     <precision type="int" >1000000</precision>
                     <uncertainty type="int" >0</uncertainty>
                    </uncertainty>
                   </item>
                   <item type="UncertainValue" >
                    <value type="float" >0.025000000000000008</value>
                    <uncertainty type="Uncertainty" >
                     <precision type="int" >1000000</precision>
                     <uncertainty type="int" >0</uncertainty>
                    </uncertainty>
                   </item>
                   <item type="UncertainValue" >
                    <value type="float" >-1.6476344565469667e-18</value>
                    <uncertainty type="Uncertainty" >
                     <precision type="int" >1000000</precision>
                     <uncertainty type="int" >0</uncertainty>
                    </uncertainty>
                   </item>
                   <item type="UncertainValue" >
                    <value type="float" >0.001835306505608</value>
                    <uncertainty type="Uncertainty" >
                     <precision type="int" >1000000</precision>
                     <uncertainty type="int" >0</uncertainty>
                    </uncertainty>
                   </item>
                   <item type="UncertainValue" >
                    <value type="float" >-1.6476344565469659e-18</value>
                    <uncertainty type="Uncertainty" >
                     <precision type="int" >1000000</precision>
                     <uncertainty type="int" >0</uncertainty>
                    </uncertainty>
                   </item>
                  </uvalues>
                  <type type="AtomicDisplacementParameters::Type" >
                   <enumerator type="int" >1</enumerator>
                  </type>
                  <u_equivalent type="float" >0.025000000000000001</u_equivalent>
                 </value>
                </adps>
               </value>
              </site>
              <annotations type="Annotations" >
               <annotations type="Container" >
                <count type="int" >1</count>
                <item type="Handle" >
                 <serial_number type="int" >233</serial_number>
                 <value type="FileOrdering" >
                  <value type="Handle" >
                   <serial_number type="int" >234</serial_number>
                   <value type="FileOrdering" >
                    <file_order type="int" >37</file_order>
                   </value>
                  </value>
                 </value>
                </item>
               </annotations>
              </annotations>
             </value>
            </item>
            <item type="Handle" >
             <serial_number type="int" >235</serial_number>
             <value type="Atom3d" >
              <element type="Element" >
               <code type="char" >1</code>
              </element>
              <formal_charge type="int" >0</formal_charge>
              <radius type="float" >0.68000000000000005</radius>
              <label type="string" >C17</label>
              <site type="Handle" >
               <serial_number type="int" >236</serial_number>
               <value type="Site" >
                <orthogonal type="Point" >
                 <coordinates type="Vector" >
                  <vector type="Container" >
                   <count type="int" >3</count>
                   <item type="float" >4.0961161570629105</item>
                   <item type="float" >7.9066984390000012</item>
                   <item type="float" >6.3925719226832927</item>
                  </vector>
                 </coordinates>
                </orthogonal>
                <fractional type="Point" >
                 <coordinates type="Vector" >
                  <vector type="Container" >
                   <count type="int" >3</count>
                   <item type="float" >0.46333999999999997</item>
                   <item type="float" >1.0846100000000001</item>
                   <item type="float" >0.25619999999999998</item>
                  </vector>
                 </coordinates>
                </fractional>
                <uncertain_value type="UncertainValue" >
                 <value type="float" >1</value>
                 <uncertainty type="Uncertainty" >
                  <precision type="int" >0</precision>
                  <uncertainty type="int" >0</uncertainty>
                 </uncertainty>
                </uncertain_value>
                <uncertainty type="Handle" >
                 <serial_number type="int" >237</serial_number>
                 <value type="Container" >
                  <count type="int" >3</count>
                  <item type="Uncertainty" >
                   <precision type="int" >5</precision>
                   <uncertainty type="int" >10</uncertainty>
                  </item>
                  <item type="Uncertainty" >
                   <precision type="int" >5</precision>
                   <uncertainty type="int" >14</uncertainty>
                  </item>
                  <item type="Uncertainty" >
                   <precision type="int" >5</precision>
                   <uncertainty type="int" >4</uncertainty>
                  </item>
                 </value>
                </uncertainty>
                <adps type="Handle" >
                 <serial_number type="int" >238</serial_number>
                 <value type="AtomicDisplacementParameters" >
                  <uvalues type="Container" >
                   <count type="int" >6</count>
                   <item type="UncertainValue" >
                    <value type="float" >0.018700000000000001</value>
                    <uncertainty type="Uncertainty" >
                     <precision type="int" >4</precision>
                     <uncertainty type="int" >5</uncertainty>
                    </uncertainty>
                   </item>
                   <item type="UncertainValue" >
                    <value type="float" >0.021000000000000001</value>
                    <uncertainty type="Uncertainty" >
                     <precision type="int" >4</precision>
                     <uncertainty type="int" >5</uncertainty>
                    </uncertainty>
                   </item>
                   <item type="UncertainValue" >
                    <value type="float" >0.016</value>
                    <uncertainty type="Uncertainty" >
                     <precision type="int" >4</precision>
                     <uncertainty type="int" >4</uncertainty>
                    </uncertainty>
                   </item>
                   <item type="UncertainValue" >
                    <value type="float" >-0.0025999999999999999</value>
                    <uncertainty type="Uncertainty" >
                     <precision type="int" >4</precision>
                     <uncertainty type="int" >4</uncertainty>
                    </uncertainty>
                   </item>
                   <item type="UncertainValue" >
                    <value type="float" >0.0030999999999999999</value>
                    <uncertainty type="Uncertainty" >
                     <precision type="int" >4</precision>
                     <uncertainty type="int" >4</uncertainty>
                    </uncertainty>
                   </item>
                   <item type="UncertainValue" >
                    <value type="float" >-0.0019</value>
                    <uncertainty type="Uncertainty" >
                     <precision type="int" >4</precision>
                     <uncertainty type="int" >4</uncertainty>
                    </uncertainty>
                   </item>
                  </uvalues>
                  <type type="AtomicDisplacementParameters::Type" >
                   <enumerator type="int" >0</enumerator>
                  </type>
                  <u_equivalent type="float" >0.018476800605085861</u_equivalent>
                 </value>
                </adps>
               </value>
              </site>
              <annotations type="Annotations" >
               <annotations type="Container" >
                <count type="int" >1</count>
                <item type="Handle" >
                 <serial_number type="int" >239</serial_number>
                 <value type="FileOrdering" >
                  <value type="Handle" >
                   <serial_number type="int" >240</serial_number>
                   <value type="FileOrdering" >
                    <file_order type="int" >38</file_order>
                   </value>
                  </value>
                 </value>
                </item>
               </annotations>
              </annotations>
             </value>
            </item>
            <item type="Handle" >
             <serial_number type="int" >241</serial_number>
             <value type="Atom3d" >
              <element type="Element" >
               <code type="char" >2</code>
              </element>
              <formal_charge type="int" >0</formal_charge>
              <radius type="float" >0.23000000000000001</radius>
              <label type="string" >H17</label>
              <site type="Handle" >
               <serial_number type="int" >242</serial_number>
               <value type="Site" >
                <orthogonal type="Point" >
                 <coordinates type="Vector" >
                  <vector type="Container" >
                   <count type="int" >3</count>
                   <item type="float" >3.9384706308664295</item>
                   <item type="float" >8.7930773799999997</item>
                   <item type="float" >6.6944849604056493</item>
                  </vector>
                 </coordinates>
                </orthogonal>
                <fractional type="Point" >
                 <coordinates type="Vector" >
                  <vector type="Container" >
                   <count type="int" >3</count>
                   <item type="float" >0.4496</item>
                   <item type="float" >1.2061999999999999</item>
                   <item type="float" >0.26829999999999998</item>
                  </vector>
                 </coordinates>
                </fractional>
                <uncertain_value type="UncertainValue" >
                 <value type="float" >1</value>
                 <uncertainty type="Uncertainty" >
                  <precision type="int" >0</precision>
                  <uncertainty type="int" >0</uncertainty>
                 </uncertainty>
                </uncertain_value>
                <uncertainty type="Handle" >
                 <serial_number type="int" >243</serial_number>
                 <value type="Container" >
                  <count type="int" >3</count>
                  <item type="Uncertainty" >
                   <precision type="int" >4</precision>
                   <uncertainty type="int" >0</uncertainty>
                  </item>
                  <item type="Uncertainty" >
                   <precision type="int" >4</precision>
                   <uncertainty type="int" >0</uncertainty>
                  </item>
                  <item type="Uncertainty" >
                   <precision type="int" >4</precision>
                   <uncertainty type="int" >0</uncertainty>
                  </item>
                 </value>
                </uncertainty>
                <adps type="Handle" >
                 <serial_number type="int" >244</serial_number>
                 <value type="AtomicDisplacementParameters" >
                  <uvalues type="Container" >
                   <count type="int" >6</count>
                   <item type="UncertainValue" >
                    <value type="float" >0.021999999999999999</value>
                    <uncertainty type="Uncertainty" >
                     <precision type="int" >1000000</precision>
                     <uncertainty type="int" >0</uncertainty>
                    </uncertainty>
                   </item>
                   <item type="UncertainValue" >
                    <value type="float" >0.022000000000000006</value>
                    <uncertainty type="Uncertainty" >
                     <precision type="int" >1000000</precision>
                     <uncertainty type="int" >0</uncertainty>
                    </uncertainty>
                   </item>
                   <item type="UncertainValue" >
                    <value type="float" >0.022000000000000002</value>
                    <uncertainty type="Uncertainty" >
                     <precision type="int" >1000000</precision>
                     <uncertainty type="int" >0</uncertainty>
                    </uncertainty>
                   </item>
                   <item type="UncertainValue" >
                    <value type="float" >-1.4499183217613302e-18</value>
                    <uncertainty type="Uncertainty" >
                     <precision type="int" >1000000</precision>
                     <uncertainty type="int" >0</uncertainty>
                    </uncertainty>
                   </item>
                   <item type="UncertainValue" >
                    <value type="float" >0.0016150697249350402</value>
                    <uncertainty type="Uncertainty" >
                     <precision type="int" >1000000</precision>
                     <uncertainty type="int" >0</uncertainty>
                    </uncertainty>
                   </item>
                   <item type="UncertainValue" >
                    <value type="float" >-1.4499183217613302e-18</value>
                    <uncertainty type="Uncertainty" >
                     <precision type="int" >1000000</precision>
                     <uncertainty type="int" >0</uncertainty>
                    </uncertainty>
                   </item>
                  </uvalues>
                  <type type="AtomicDisplacementParameters::Type" >
                   <enumerator type="int" >1</enumerator>
                  </type>
                  <u_equivalent type="float" >0.021999999999999999</u_equivalent>
                 </value>
                </adps>
               </value>
              </site>
              <annotations type="Annotations" >
               <annotations type="Container" >
                <count type="int" >1</count>
                <item type="Handle" >
                 <serial_number type="int" >245</serial_number>
                 <value type="FileOrdering" >
                  <value type="Handle" >
                   <serial_number type="int" >246</serial_number>
                   <value type="FileOrdering" >
                    <file_order type="int" >39</file_order>
                   </value>
                  </value>
                 </value>
                </item>
               </annotations>
              </annotations>
             </value>
            </item>
            <item type="Handle" >
             <serial_number type="int" >247</serial_number>
             <value type="Atom3d" >
              <element type="Element" >
               <code type="char" >1</code>
              </element>
              <formal_charge type="int" >0</formal_charge>
              <radius type="float" >0.68000000000000005</radius>
              <label type="string" >C18</label>
              <site type="Handle" >
               <serial_number type="int" >248</serial_number>
               <value type="Site" >
                <orthogonal type="Point" >
                 <coordinates type="Vector" >
                  <vector type="Container" >
                   <count type="int" >3</count>
                   <item type="float" >3.2424134422223778</item>
                   <item type="float" >7.3348057840000003</item>
                   <item type="float" >5.4389259473321792</item>
                  </vector>
                 </coordinates>
                </orthogonal>
                <fractional type="Point" >
                 <coordinates type="Vector" >
                  <vector type="Container" >
                   <count type="int" >3</count>
                   <item type="float" >0.36959999999999998</item>
                   <item type="float" >1.0061599999999999</item>
                   <item type="float" >0.21798000000000001</item>
                  </vector>
                 </coordinates>
                </fractional>
                <uncertain_value type="UncertainValue" >
                 <value type="float" >1</value>
                 <uncertainty type="Uncertainty" >
                  <precision type="int" >0</precision>
                  <uncertainty type="int" >0</uncertainty>
                 </uncertainty>
                </uncertain_value>
                <uncertainty type="Handle" >
                 <serial_number type="int" >249</serial_number>
                 <value type="Container" >
                  <count type="int" >3</count>
                  <item type="Uncertainty" >
                   <precision type="int" >5</precision>
                   <uncertainty type="int" >10</uncertainty>
                  </item>
                  <item type="Uncertainty" >
                   <precision type="int" >5</precision>
                   <uncertainty type="int" >13</uncertainty>
                  </item>
                  <item type="Uncertainty" >
                   <precision type="int" >5</precision>
                   <uncertainty type="int" >4</uncertainty>
                  </item>
                 </value>
                </uncertainty>
                <adps type="Handle" >
                 <serial_number type="int" >250</serial_number>
                 <value type="AtomicDisplacementParameters" >
                  <uvalues type="Container" >
                   <count type="int" >6</count>
                   <item type="UncertainValue" >
                    <value type="float" >0.0152</value>
                    <uncertainty type="Uncertainty" >
                     <precision type="int" >4</precision>
                     <uncertainty type="int" >4</uncertainty>
                    </uncertainty>
                   </item>
                   <item type="UncertainValue" >
                    <value type="float" >0.0172</value>
                    <uncertainty type="Uncertainty" >
                     <precision type="int" >4</precision>
                     <uncertainty type="int" >4</uncertainty>
                    </uncertainty>
                   </item>
                   <item type="UncertainValue" >
                    <value type="float" >0.0141</value>
                    <uncertainty type="Uncertainty" >
                     <precision type="int" >4</precision>
                     <uncertainty type="int" >4</uncertainty>
                    </uncertainty>
                   </item>
                   <item type="UncertainValue" >
                    <value type="float" >-0.0011000000000000001</value>
                    <uncertainty type="Uncertainty" >
                     <precision type="int" >4</precision>
                     <uncertainty type="int" >3</uncertainty>
                    </uncertainty>
                   </item>
                   <item type="UncertainValue" >
                    <value type="float" >0.0033</value>
                    <uncertainty type="Uncertainty" >
                     <precision type="int" >4</precision>
                     <uncertainty type="int" >3</uncertainty>
                    </uncertainty>
                   </item>
                   <item type="UncertainValue" >
                    <value type="float" >0.00029999999999999997</value>
                    <uncertainty type="Uncertainty" >
                     <precision type="int" >4</precision>
                     <uncertainty type="int" >3</uncertainty>
                    </uncertainty>
                   </item>
                  </uvalues>
                  <type type="AtomicDisplacementParameters::Type" >
                   <enumerator type="int" >0</enumerator>
                  </type>
                  <u_equivalent type="float" >0.015390539185969609</u_equivalent>
                 </value>
                </adps>
               </value>
              </site>
              <annotations type="Annotations" >
               <annotations type="Container" >
                <count type="int" >1</count>
                <item type="Handle" >
                 <serial_number type="int" >251</serial_number>
                 <value type="FileOrdering" >
                  <value type="Handle" >
                   <serial_number type="int" >252</serial_number>
                   <value type="FileOrdering" >
                    <file_order type="int" >40</file_order>
                   </value>
                  </value>
                 </value>
                </item>
               </annotations>
              </annotations>
             </value>
            </item>
            <item type="Handle" >
             <serial_number type="int" >253</serial_number>
             <value type="Atom3d" >
              <element type="Element" >
               <code type="char" >1</code>
              </element>
              <formal_charge type="int" >0</formal_charge>
              <radius type="float" >0.68000000000000005</radius>
              <label type="string" >C19</label>
              <site type="Handle" >
               <serial_number type="int" >254</serial_number>
               <value type="Site" >
                <orthogonal type="Point" >
                 <coordinates type="Vector" >
                  <vector type="Container" >
                   <count type="int" >3</count>
                   <item type="float" >2.1169447973760471</item>
                   <item type="float" >8.0430195690000001</item>
                   <item type="float" >4.8954824794319363</item>
                  </vector>
                 </coordinates>
                </orthogonal>
                <fractional type="Point" >
                 <coordinates type="Vector" >
                  <vector type="Container" >
                   <count type="int" >3</count>
                   <item type="float" >0.25135000000000002</item>
                   <item type="float" >1.10331</item>
                   <item type="float" >0.19620000000000001</item>
                  </vector>
                 </coordinates>
                </fractional>
                <uncertain_value type="UncertainValue" >
                 <value type="float" >1</value>
                 <uncertainty type="Uncertainty" >
                  <precision type="int" >0</precision>
                  <uncertainty type="int" >0</uncertainty>
                 </uncertainty>
                </uncertain_value>
                <uncertainty type="Handle" >
                 <serial_number type="int" >255</serial_number>
                 <value type="Container" >
                  <count type="int" >3</count>
                  <item type="Uncertainty" >
                   <precision type="int" >5</precision>
                   <uncertainty type="int" >10</uncertainty>
                  </item>
                  <item type="Uncertainty" >
                   <precision type="int" >5</precision>
                   <uncertainty type="int" >13</uncertainty>
                  </item>
                  <item type="Uncertainty" >
                   <precision type="int" >5</precision>
                   <uncertainty type="int" >4</uncertainty>
                  </item>
                 </value>
                </uncertainty>
                <adps type="Handle" >
                 <serial_number type="int" >256</serial_number>
                 <value type="AtomicDisplacementParameters" >
                  <uvalues type="Container" >
                   <count type="int" >6</count>
                   <item type="UncertainValue" >
                    <value type="float" >0.016199999999999999</value>
                    <uncertainty type="Uncertainty" >
                     <precision type="int" >4</precision>
                     <uncertainty type="int" >5</uncertainty>
                    </uncertainty>
                   </item>
                   <item type="UncertainValue" >
                    <value type="float" >0.015100000000000001</value>
                    <uncertainty type="Uncertainty" >
                     <precision type="int" >4</precision>
                     <uncertainty type="int" >4</uncertainty>
                    </uncertainty>
                   </item>
                   <item type="UncertainValue" >
                    <value type="float" >0.017600000000000001</value>
                    <uncertainty type="Uncertainty" >
                     <precision type="int" >4</precision>
                     <uncertainty type="int" >4</uncertainty>
                    </uncertainty>
                   </item>
                   <item type="UncertainValue" >
                    <value type="float" >0.00040000000000000002</value>
                    <uncertainty type="Uncertainty" >
                     <precision type="int" >4</precision>
                     <uncertainty type="int" >3</uncertainty>
                    </uncertainty>
                   </item>
                   <item type="UncertainValue" >
                    <value type="float" >0.0044999999999999997</value>
                    <uncertainty type="Uncertainty" >
                     <precision type="int" >4</precision>
                     <uncertainty type="int" >3</uncertainty>
                    </uncertainty>
                   </item>
                   <item type="UncertainValue" >
                    <value type="float" >-0.0022000000000000001</value>
                    <uncertainty type="Uncertainty" >
                     <precision type="int" >4</precision>
                     <uncertainty type="int" >3</uncertainty>
                    </uncertainty>
                   </item>
                  </uvalues>
                  <type type="AtomicDisplacementParameters::Type" >
                   <enumerator type="int" >0</enumerator>
                  </type>
                  <u_equivalent type="float" >0.016139618990454598</u_equivalent>
                 </value>
                </adps>
               </value>
              </site>
              <annotations type="Annotations" >
               <annotations type="Container" >
                <count type="int" >1</count>
                <item type="Handle" >
                 <serial_number type="int" >257</serial_number>
                 <value type="FileOrdering" >
                  <value type="Handle" >
                   <serial_number type="int" >258</serial_number>
                   <value type="FileOrdering" >
                    <file_order type="int" >41</file_order>
                   </value>
                  </value>
                 </value>
                </item>
               </annotations>
              </annotations>
             </value>
            </item>
            <item type="Handle" >
             <serial_number type="int" >259</serial_number>
             <value type="Atom3d" >
              <element type="Element" >
               <code type="char" >2</code>
              </element>
              <formal_charge type="int" >0</formal_charge>
              <radius type="float" >0.23000000000000001</radius>
              <label type="string" >H19</label>
              <site type="Handle" >
               <serial_number type="int" >260</serial_number>
               <value type="Site" >
                <orthogonal type="Point" >
                 <coordinates type="Vector" >
                  <vector type="Container" >
                   <count type="int" >3</count>
                   <item type="float" >1.9539545423842613</item>
                   <item type="float" >8.9366884100000004</item>
                   <item type="float" >5.1749391755055223</item>
                  </vector>
                 </coordinates>
                </orthogonal>
                <fractional type="Point" >
                 <coordinates type="Vector" >
                  <vector type="Container" >
                   <count type="int" >3</count>
                   <item type="float" >0.2369</item>
                   <item type="float" >1.2259</item>
                   <item type="float" >0.2074</item>
                  </vector>
                 </coordinates>
                </fractional>
                <uncertain_value type="UncertainValue" >
                 <value type="float" >1</value>
                 <uncertainty type="Uncertainty" >
                  <precision type="int" >0</precision>
                  <uncertainty type="int" >0</uncertainty>
                 </uncertainty>
                </uncertain_value>
                <uncertainty type="Handle" >
                 <serial_number type="int" >261</serial_number>
                 <value type="Container" >
                  <count type="int" >3</count>
                  <item type="Uncertainty" >
                   <precision type="int" >4</precision>
                   <uncertainty type="int" >0</uncertainty>
                  </item>
                  <item type="Uncertainty" >
                   <precision type="int" >4</precision>
                   <uncertainty type="int" >0</uncertainty>
                  </item>
                  <item type="Uncertainty" >
                   <precision type="int" >4</precision>
                   <uncertainty type="int" >0</uncertainty>
                  </item>
                 </value>
                </uncertainty>
                <adps type="Handle" >
                 <serial_number type="int" >262</serial_number>
                 <value type="AtomicDisplacementParameters" >
                  <uvalues type="Container" >
                   <count type="int" >6</count>
                   <item type="UncertainValue" >
                    <value type="float" >0.019</value>
                    <uncertainty type="Uncertainty" >
                     <precision type="int" >1000000</precision>
                     <uncertainty type="int" >0</uncertainty>
                    </uncertainty>
                   </item>
                   <item type="UncertainValue" >
                    <value type="float" >0.019000000000000003</value>
                    <uncertainty type="Uncertainty" >
                     <precision type="int" >1000000</precision>
                     <uncertainty type="int" >0</uncertainty>
                    </uncertainty>
                   </item>
                   <item type="UncertainValue" >
                    <value type="float" >0.019000000000000003</value>
                    <uncertainty type="Uncertainty" >
                     <precision type="int" >1000000</precision>
                     <uncertainty type="int" >0</uncertainty>
                    </uncertainty>
                   </item>
                   <item type="UncertainValue" >
                    <value type="float" >-1.2522021869756944e-18</value>
                    <uncertainty type="Uncertainty" >
                     <precision type="int" >1000000</precision>
                     <uncertainty type="int" >0</uncertainty>
                    </uncertainty>
                   </item>
                   <item type="UncertainValue" >
                    <value type="float" >0.0013948329442620801</value>
                    <uncertainty type="Uncertainty" >
                     <precision type="int" >1000000</precision>
                     <uncertainty type="int" >0</uncertainty>
                    </uncertainty>
                   </item>
                   <item type="UncertainValue" >
                    <value type="float" >-1.2522021869756942e-18</value>
                    <uncertainty type="Uncertainty" >
                     <precision type="int" >1000000</precision>
                     <uncertainty type="int" >0</uncertainty>
                    </uncertainty>
                   </item>
                  </uvalues>
                  <type type="AtomicDisplacementParameters::Type" >
                   <enumerator type="int" >1</enumerator>
                  </type>
                  <u_equivalent type="float" >0.019</u_equivalent>
                 </value>
                </adps>
               </value>
              </site>
              <annotations type="Annotations" >
               <annotations type="Container" >
                <count type="int" >1</count>
                <item type="Handle" >
                 <serial_number type="int" >263</serial_number>
                 <value type="FileOrdering" >
                  <value type="Handle" >
                   <serial_number type="int" >264</serial_number>
                   <value type="FileOrdering" >
                    <file_order type="int" >42</file_order>
                   </value>
                  </value>
                 </value>
                </item>
               </annotations>
              </annotations>
             </value>
            </item>
            <item type="Handle" >
             <serial_number type="int" >265</serial_number>
             <value type="Atom3d" >
              <element type="Element" >
               <code type="char" >1</code>
              </element>
              <formal_charge type="int" >0</formal_charge>
              <radius type="float" >0.68000000000000005</radius>
              <label type="string" >C20</label>
              <site type="Handle" >
               <serial_number type="int" >266</serial_number>
               <value type="Site" >
                <orthogonal type="Point" >
                 <coordinates type="Vector" >
                  <vector type="Container" >
                   <count type="int" >3</count>
                   <item type="float" >1.2805937767379401</item>
                   <item type="float" >7.4687941460000005</item>
                   <item type="float" >3.9939851196874105</item>
                  </vector>
                 </coordinates>
                </orthogonal>
                <fractional type="Point" >
                 <coordinates type="Vector" >
                  <vector type="Container" >
                   <count type="int" >3</count>
                   <item type="float" >0.15976000000000001</item>
                   <item type="float" >1.02454</item>
                   <item type="float" >0.16006999999999999</item>
                  </vector>
                 </coordinates>
                </fractional>
                <uncertain_value type="UncertainValue" >
                 <value type="float" >1</value>
                 <uncertainty type="Uncertainty" >
                  <precision type="int" >0</precision>
                  <uncertainty type="int" >0</uncertainty>
                 </uncertainty>
                </uncertain_value>
                <uncertainty type="Handle" >
                 <serial_number type="int" >267</serial_number>
                 <value type="Container" >
                  <count type="int" >3</count>
                  <item type="Uncertainty" >
                   <precision type="int" >5</precision>
                   <uncertainty type="int" >10</uncertainty>
                  </item>
                  <item type="Uncertainty" >
                   <precision type="int" >5</precision>
                   <uncertainty type="int" >13</uncertainty>
                  </item>
                  <item type="Uncertainty" >
                   <precision type="int" >5</precision>
                   <uncertainty type="int" >4</uncertainty>
                  </item>
                 </value>
                </uncertainty>
                <adps type="Handle" >
                 <serial_number type="int" >268</serial_number>
                 <value type="AtomicDisplacementParameters" >
                  <uvalues type="Container" >
                   <count type="int" >6</count>
                   <item type="UncertainValue" >
                    <value type="float" >0.0143</value>
                    <uncertainty type="Uncertainty" >
                     <precision type="int" >4</precision>
                     <uncertainty type="int" >4</uncertainty>
                    </uncertainty>
                   </item>
                   <item type="UncertainValue" >
                    <value type="float" >0.0147</value>
                    <uncertainty type="Uncertainty" >
                     <precision type="int" >4</precision>
                     <uncertainty type="int" >4</uncertainty>
                    </uncertainty>
                   </item>
                   <item type="UncertainValue" >
                    <value type="float" >0.017999999999999999</value>
                    <uncertainty type="Uncertainty" >
                     <precision type="int" >4</precision>
                     <uncertainty type="int" >5</uncertainty>
                    </uncertainty>
                   </item>
                   <item type="UncertainValue" >
                    <value type="float" >0.0016999999999999999</value>
                    <uncertainty type="Uncertainty" >
                     <precision type="int" >4</precision>
                     <uncertainty type="int" >3</uncertainty>
                    </uncertainty>
                   </item>
                   <item type="UncertainValue" >
                    <value type="float" >0.0025000000000000001</value>
                    <uncertainty type="Uncertainty" >
                     <precision type="int" >4</precision>
                     <uncertainty type="int" >3</uncertainty>
                    </uncertainty>
                   </item>
                   <item type="UncertainValue" >
                    <value type="float" >-0.0001</value>
                    <uncertainty type="Uncertainty" >
                     <precision type="int" >4</precision>
                     <uncertainty type="int" >3</uncertainty>
                    </uncertainty>
                   </item>
                  </uvalues>
                  <type type="AtomicDisplacementParameters::Type" >
                   <enumerator type="int" >0</enumerator>
                  </type>
                  <u_equivalent type="float" >0.015601989774716609</u_equivalent>
                 </value>
                </adps>
               </value>
              </site>
              <annotations type="Annotations" >
               <annotations type="Container" >
                <count type="int" >1</count>
                <item type="Handle" >
                 <serial_number type="int" >269</serial_number>
                 <value type="FileOrdering" >
                  <value type="Handle" >
                   <serial_number type="int" >270</serial_number>
                   <value type="FileOrdering" >
                    <file_order type="int" >43</file_order>
                   </value>
                  </value>
                 </value>
                </item>
               </annotations>
              </annotations>
             </value>
            </item>
            <item type="Handle" >
             <serial_number type="int" >271</serial_number>
             <value type="Atom3d" >
              <element type="Element" >
               <code type="char" >2</code>
              </element>
              <formal_charge type="int" >0</formal_charge>
              <radius type="float" >0.23000000000000001</radius>
              <label type="string" >H20</label>
              <site type="Handle" >
               <serial_number type="int" >272</serial_number>
               <value type="Site" >
                <orthogonal type="Point" >
                 <coordinates type="Vector" >
                  <vector type="Container" >
                   <count type="int" >3</count>
                   <item type="float" >0.54385958376823895</item>
                   <item type="float" >7.9656737300000007</item>
                   <item type="float" >3.6578885396774816</item>
                  </vector>
                 </coordinates>
                </orthogonal>
                <fractional type="Point" >
                 <coordinates type="Vector" >
                  <vector type="Container" >
                   <count type="int" >3</count>
                   <item type="float" >0.082500000000000004</item>
                   <item type="float" >1.0927</item>
                   <item type="float" >0.14660000000000001</item>
                  </vector>
                 </coordinates>
                </fractional>
                <uncertain_value type="UncertainValue" >
                 <value type="float" >1</value>
                 <uncertainty type="Uncertainty" >
                  <precision type="int" >0</precision>
                  <uncertainty type="int" >0</uncertainty>
                 </uncertainty>
                </uncertain_value>
                <uncertainty type="Handle" >
                 <serial_number type="int" >273</serial_number>
                 <value type="Container" >
                  <count type="int" >3</count>
                  <item type="Uncertainty" >
                   <precision type="int" >4</precision>
                   <uncertainty type="int" >0</uncertainty>
                  </item>
                  <item type="Uncertainty" >
                   <precision type="int" >4</precision>
                   <uncertainty type="int" >0</uncertainty>
                  </item>
                  <item type="Uncertainty" >
                   <precision type="int" >4</precision>
                   <uncertainty type="int" >0</uncertainty>
                  </item>
                 </value>
                </uncertainty>
                <adps type="Handle" >
                 <serial_number type="int" >274</serial_number>
                 <value type="AtomicDisplacementParameters" >
                  <uvalues type="Container" >
                   <count type="int" >6</count>
                   <item type="UncertainValue" >
                    <value type="float" >0.019</value>
                    <uncertainty type="Uncertainty" >
                     <precision type="int" >1000000</precision>
                     <uncertainty type="int" >0</uncertainty>
                    </uncertainty>
                   </item>
                   <item type="UncertainValue" >
                    <value type="float" >0.019000000000000003</value>
                    <uncertainty type="Uncertainty" >
                     <precision type="int" >1000000</precision>
                     <uncertainty type="int" >0</uncertainty>
                    </uncertainty>
                   </item>
                   <item type="UncertainValue" >
                    <value type="float" >0.019000000000000003</value>
                    <uncertainty type="Uncertainty" >
                     <precision type="int" >1000000</precision>
                     <uncertainty type="int" >0</uncertainty>
                    </uncertainty>
                   </item>
                   <item type="UncertainValue" >
                    <value type="float" >-1.2522021869756944e-18</value>
                    <uncertainty type="Uncertainty" >
                     <precision type="int" >1000000</precision>
                     <uncertainty type="int" >0</uncertainty>
                    </uncertainty>
                   </item>
                   <item type="UncertainValue" >
                    <value type="float" >0.0013948329442620801</value>
                    <uncertainty type="Uncertainty" >
                     <precision type="int" >1000000</precision>
                     <uncertainty type="int" >0</uncertainty>
                    </uncertainty>
                   </item>
                   <item type="UncertainValue" >
                    <value type="float" >-1.2522021869756942e-18</value>
                    <uncertainty type="Uncertainty" >
                     <precision type="int" >1000000</precision>
                     <uncertainty type="int" >0</uncertainty>
                    </uncertainty>
                   </item>
                  </uvalues>
                  <type type="AtomicDisplacementParameters::Type" >
                   <enumerator type="int" >1</enumerator>
                  </type>
                  <u_equivalent type="float" >0.019</u_equivalent>
                 </value>
                </adps>
               </value>
              </site>
              <annotations type="Annotations" >
               <annotations type="Container" >
                <count type="int" >1</count>
                <item type="Handle" >
                 <serial_number type="int" >275</serial_number>
                 <value type="FileOrdering" >
                  <value type="Handle" >
                   <serial_number type="int" >276</serial_number>
                   <value type="FileOrdering" >
                    <file_order type="int" >44</file_order>
                   </value>
                  </value>
                 </value>
                </item>
               </annotations>
              </annotations>
             </value>
            </item>
            <item type="Handle" >
             <serial_number type="int" >277</serial_number>
             <value type="Atom3d" >
              <element type="Element" >
               <code type="char" >1</code>
              </element>
              <formal_charge type="int" >0</formal_charge>
              <radius type="float" >0.68000000000000005</radius>
              <label type="string" >C21</label>
              <site type="Handle" >
               <serial_number type="int" >278</serial_number>
               <value type="Site" >
                <orthogonal type="Point" >
                 <coordinates type="Vector" >
                  <vector type="Container" >
                   <count type="int" >3</count>
                   <item type="float" >1.4913244561665187</item>
                   <item type="float" >6.1182672720000006</item>
                   <item type="float" >3.5386204140317901</item>
                  </vector>
                 </coordinates>
                </orthogonal>
                <fractional type="Point" >
                 <coordinates type="Vector" >
                  <vector type="Container" >
                   <count type="int" >3</count>
                   <item type="float" >0.17774000000000001</item>
                   <item type="float" >0.83928000000000003</item>
                   <item type="float" >0.14182</item>
                  </vector>
                 </coordinates>
                </fractional>
                <uncertain_value type="UncertainValue" >
                 <value type="float" >1</value>
                 <uncertainty type="Uncertainty" >
                  <precision type="int" >0</precision>
                  <uncertainty type="int" >0</uncertainty>
                 </uncertainty>
                </uncertain_value>
                <uncertainty type="Handle" >
                 <serial_number type="int" >279</serial_number>
                 <value type="Container" >
                  <count type="int" >3</count>
                  <item type="Uncertainty" >
                   <precision type="int" >5</precision>
                   <uncertainty type="int" >9</uncertainty>
                  </item>
                  <item type="Uncertainty" >
                   <precision type="int" >5</precision>
                   <uncertainty type="int" >13</uncertainty>
                  </item>
                  <item type="Uncertainty" >
                   <precision type="int" >5</precision>
                   <uncertainty type="int" >4</uncertainty>
                  </item>
                 </value>
                </uncertainty>
                <adps type="Handle" >
                 <serial_number type="int" >280</serial_number>
                 <value type="AtomicDisplacementParameters" >
                  <uvalues type="Container" >
                   <count type="int" >6</count>
                   <item type="UncertainValue" >
                    <value type="float" >0.014</value>
                    <uncertainty type="Uncertainty" >
                     <precision type="int" >4</precision>
                     <uncertainty type="int" >4</uncertainty>
                    </uncertainty>
                   </item>
                   <item type="UncertainValue" >
                    <value type="float" >0.0141</value>
                    <uncertainty type="Uncertainty" >
                     <precision type="int" >4</precision>
                     <uncertainty type="int" >4</uncertainty>
                    </uncertainty>
                   </item>
                   <item type="UncertainValue" >
                    <value type="float" >0.0141</value>
                    <uncertainty type="Uncertainty" >
                     <precision type="int" >4</precision>
                     <uncertainty type="int" >4</uncertainty>
                    </uncertainty>
                   </item>
                   <item type="UncertainValue" >
                    <value type="float" >0.00050000000000000001</value>
                    <uncertainty type="Uncertainty" >
                     <precision type="int" >4</precision>
                     <uncertainty type="int" >3</uncertainty>
                    </uncertainty>
                   </item>
                   <item type="UncertainValue" >
                    <value type="float" >0.0028999999999999998</value>
                    <uncertainty type="Uncertainty" >
                     <precision type="int" >4</precision>
                     <uncertainty type="int" >3</uncertainty>
                    </uncertainty>
                   </item>
                   <item type="UncertainValue" >
                    <value type="float" >0.00089999999999999998</value>
                    <uncertainty type="Uncertainty" >
                     <precision type="int" >4</precision>
                     <uncertainty type="int" >3</uncertainty>
                    </uncertainty>
                   </item>
                  </uvalues>
                  <type type="AtomicDisplacementParameters::Type" >
                   <enumerator type="int" >0</enumerator>
                  </type>
                  <u_equivalent type="float" >0.013974721107394795</u_equivalent>
                 </value>
                </adps>
               </value>
              </site>
              <annotations type="Annotations" >
               <annotations type="Container" >
                <count type="int" >1</count>
                <item type="Handle" >
                 <serial_number type="int" >281</serial_number>
                 <value type="FileOrdering" >
                  <value type="Handle" >
                   <serial_number type="int" >282</serial_number>
                   <value type="FileOrdering" >
                    <file_order type="int" >45</file_order>
                   </value>
                  </value>
                 </value>
                </item>
               </annotations>
              </annotations>
             </value>
            </item>
            <item type="Handle" >
             <serial_number type="int" >283</serial_number>
             <value type="Atom3d" >
              <element type="Element" >
               <code type="char" >1</code>
              </element>
              <formal_charge type="int" >0</formal_charge>
              <radius type="float" >0.68000000000000005</radius>
              <label type="string" >C22</label>
              <site type="Handle" >
               <serial_number type="int" >284</serial_number>
               <value type="Site" >
                <orthogonal type="Point" >
                 <coordinates type="Vector" >
                  <vector type="Container" >
                   <count type="int" >3</count>
                   <item type="float" >2.6333571826804834</item>
                   <item type="float" >5.41202176</item>
                   <item type="float" >4.0136967973568876</item>
                  </vector>
                 </coordinates>
                </orthogonal>
                <fractional type="Point" >
                 <coordinates type="Vector" >
                  <vector type="Container" >
                   <count type="int" >3</count>
                   <item type="float" >0.29715999999999998</item>
                   <item type="float" >0.74239999999999995</item>
                   <item type="float" >0.16086</item>
                  </vector>
                 </coordinates>
                </fractional>
                <uncertain_value type="UncertainValue" >
                 <value type="float" >1</value>
                 <uncertainty type="Uncertainty" >
                  <precision type="int" >0</precision>
                  <uncertainty type="int" >0</uncertainty>
                 </uncertainty>
                </uncertain_value>
                <uncertainty type="Handle" >
                 <serial_number type="int" >285</serial_number>
                 <value type="Container" >
                  <count type="int" >3</count>
                  <item type="Uncertainty" >
                   <precision type="int" >5</precision>
                   <uncertainty type="int" >9</uncertainty>
                  </item>
                  <item type="Uncertainty" >
                   <precision type="int" >5</precision>
                   <uncertainty type="int" >13</uncertainty>
                  </item>
                  <item type="Uncertainty" >
                   <precision type="int" >5</precision>
                   <uncertainty type="int" >4</uncertainty>
                  </item>
                 </value>
                </uncertainty>
                <adps type="Handle" >
                 <serial_number type="int" >286</serial_number>
                 <value type="AtomicDisplacementParameters" >
                  <uvalues type="Container" >
                   <count type="int" >6</count>
                   <item type="UncertainValue" >
                    <value type="float" >0.0137</value>
                    <uncertainty type="Uncertainty" >
                     <precision type="int" >4</precision>
                     <uncertainty type="int" >4</uncertainty>
                    </uncertainty>
                   </item>
                   <item type="UncertainValue" >
                    <value type="float" >0.0141</value>
                    <uncertainty type="Uncertainty" >
                     <precision type="int" >4</precision>
                     <uncertainty type="int" >4</uncertainty>
                    </uncertainty>
                   </item>
                   <item type="UncertainValue" >
                    <value type="float" >0.014</value>
                    <uncertainty type="Uncertainty" >
                     <precision type="int" >4</precision>
                     <uncertainty type="int" >4</uncertainty>
                    </uncertainty>
                   </item>
                   <item type="UncertainValue" >
                    <value type="float" >0.00020000000000000001</value>
                    <uncertainty type="Uncertainty" >
                     <precision type="int" >4</precision>
                     <uncertainty type="int" >3</uncertainty>
                    </uncertainty>
                   </item>
                   <item type="UncertainValue" >
                    <value type="float" >0.0033999999999999998</value>
                    <uncertainty type="Uncertainty" >
                     <precision type="int" >4</precision>
                     <uncertainty type="int" >3</uncertainty>
                    </uncertainty>
                   </item>
                   <item type="UncertainValue" >
                    <value type="float" >0.0016000000000000001</value>
                    <uncertainty type="Uncertainty" >
                     <precision type="int" >4</precision>
                     <uncertainty type="int" >3</uncertainty>
                    </uncertainty>
                   </item>
                  </uvalues>
                  <type type="AtomicDisplacementParameters::Type" >
                   <enumerator type="int" >0</enumerator>
                  </type>
                  <u_equivalent type="float" >0.013816061949341041</u_equivalent>
                 </value>
                </adps>
               </value>
              </site>
              <annotations type="Annotations" >
               <annotations type="Container" >
                <count type="int" >1</count>
                <item type="Handle" >
                 <serial_number type="int" >287</serial_number>
                 <value type="FileOrdering" >
                  <value type="Handle" >
                   <serial_number type="int" >288</serial_number>
                   <value type="FileOrdering" >
                    <file_order type="int" >46</file_order>
                   </value>
                  </value>
                 </value>
                </item>
               </annotations>
              </annotations>
             </value>
            </item>
            <item type="Handle" >
             <serial_number type="int" >289</serial_number>
             <value type="Atom3d" >
              <element type="Element" >
               <code type="char" >1</code>
              </element>
              <formal_charge type="int" >0</formal_charge>
              <radius type="float" >0.68000000000000005</radius>
              <label type="string" >C23</label>
              <site type="Handle" >
               <serial_number type="int" >290</serial_number>
               <value type="Site" >
                <orthogonal type="Point" >
                 <coordinates type="Vector" >
                  <vector type="Container" >
                   <count type="int" >3</count>
                   <item type="float" >3.4966758247714265</item>
                   <item type="float" >6.0116889339999995</item>
                   <item type="float" >4.9813156075116805</item>
                  </vector>
                 </coordinates>
                </orthogonal>
                <fractional type="Point" >
                 <coordinates type="Vector" >
                  <vector type="Container" >
                   <count type="int" >3</count>
                   <item type="float" >0.39198</item>
                   <item type="float" >0.82465999999999995</item>
                   <item type="float" >0.19964000000000001</item>
                  </vector>
                 </coordinates>
                </fractional>
                <uncertain_value type="UncertainValue" >
                 <value type="float" >1</value>
                 <uncertainty type="Uncertainty" >
                  <precision type="int" >0</precision>
                  <uncertainty type="int" >0</uncertainty>
                 </uncertainty>
                </uncertain_value>
                <uncertainty type="Handle" >
                 <serial_number type="int" >291</serial_number>
                 <value type="Container" >
                  <count type="int" >3</count>
                  <item type="Uncertainty" >
                   <precision type="int" >5</precision>
                   <uncertainty type="int" >9</uncertainty>
                  </item>
                  <item type="Uncertainty" >
                   <precision type="int" >5</precision>
                   <uncertainty type="int" >13</uncertainty>
                  </item>
                  <item type="Uncertainty" >
                   <precision type="int" >5</precision>
                   <uncertainty type="int" >4</uncertainty>
                  </item>
                 </value>
                </uncertainty>
                <adps type="Handle" >
                 <serial_number type="int" >292</serial_number>
                 <value type="AtomicDisplacementParameters" >
                  <uvalues type="Container" >
                   <count type="int" >6</count>
                   <item type="UncertainValue" >
                    <value type="float" >0.0135</value>
                    <uncertainty type="Uncertainty" >
                     <precision type="int" >4</precision>
                     <uncertainty type="int" >4</uncertainty>
                    </uncertainty>
                   </item>
                   <item type="UncertainValue" >
                    <value type="float" >0.015900000000000001</value>
                    <uncertainty type="Uncertainty" >
                     <precision type="int" >4</precision>
                     <uncertainty type="int" >4</uncertainty>
                    </uncertainty>
                   </item>
                   <item type="UncertainValue" >
                    <value type="float" >0.013899999999999999</value>
                    <uncertainty type="Uncertainty" >
                     <precision type="int" >4</precision>
                     <uncertainty type="int" >4</uncertainty>
                    </uncertainty>
                   </item>
                   <item type="UncertainValue" >
                    <value type="float" >-0.00080000000000000004</value>
                    <uncertainty type="Uncertainty" >
                     <precision type="int" >4</precision>
                     <uncertainty type="int" >3</uncertainty>
                    </uncertainty>
                   </item>
                   <item type="UncertainValue" >
                    <value type="float" >0.0038</value>
                    <uncertainty type="Uncertainty" >
                     <precision type="int" >4</precision>
                     <uncertainty type="int" >3</uncertainty>
                    </uncertainty>
                   </item>
                   <item type="UncertainValue" >
                    <value type="float" >0.0019</value>
                    <uncertainty type="Uncertainty" >
                     <precision type="int" >4</precision>
                     <uncertainty type="int" >3</uncertainty>
                    </uncertainty>
                   </item>
                  </uvalues>
                  <type type="AtomicDisplacementParameters::Type" >
                   <enumerator type="int" >0</enumerator>
                  </type>
                  <u_equivalent type="float" >0.014295837413314942</u_equivalent>
                 </value>
                </adps>
               </value>
              </site>
              <annotations type="Annotations" >
               <annotations type="Container" >
                <count type="int" >1</count>
                <item type="Handle" >
                 <serial_number type="int" >293</serial_number>
                 <value type="FileOrdering" >
                  <value type="Handle" >
                   <serial_number type="int" >294</serial_number>
                   <value type="FileOrdering" >
                    <file_order type="int" >47</file_order>
                   </value>
                  </value>
                 </value>
                </item>
               </annotations>
              </annotations>
             </value>
            </item>
           </atoms>
           <bonds type="Container" >
            <count type="int" >52</count>
            <item type="PersistenceGraphEdge" >
             <edge type="Handle" >
              <serial_number type="int" >295</serial_number>
              <value type="Bond3d" >
               <bond_type type="BondType" >
                <enumerator type="int" >0</enumerator>
               </bond_type>
               <polymeric type="bool" >false</polymeric>
               <annotations type="Annotations" >
                <annotations type="Container" >
                 <count type="int" >0</count>
                </annotations>
               </annotations>
              </value>
             </edge>
             <node1 type="int" >0</node1>
             <node2 type="int" >2</node2>
            </item>
            <item type="PersistenceGraphEdge" >
             <edge type="Handle" >
              <serial_number type="int" >296</serial_number>
              <value type="Bond3d" >
               <bond_type type="BondType" >
                <enumerator type="int" >0</enumerator>
               </bond_type>
               <polymeric type="bool" >false</polymeric>
               <annotations type="Annotations" >
                <annotations type="Container" >
                 <count type="int" >0</count>
                </annotations>
               </annotations>
              </value>
             </edge>
             <node1 type="int" >1</node1>
             <node2 type="int" >3</node2>
            </item>
            <item type="PersistenceGraphEdge" >
             <edge type="Handle" >
              <serial_number type="int" >297</serial_number>
              <value type="Bond3d" >
               <bond_type type="BondType" >
                <enumerator type="int" >0</enumerator>
               </bond_type>
               <polymeric type="bool" >false</polymeric>
               <annotations type="Annotations" >
                <annotations type="Container" >
                 <count type="int" >0</count>
                </annotations>
               </annotations>
              </value>
             </edge>
             <node1 type="int" >2</node1>
             <node2 type="int" >4</node2>
            </item>
            <item type="PersistenceGraphEdge" >
             <edge type="Handle" >
              <serial_number type="int" >298</serial_number>
              <value type="Bond3d" >
               <bond_type type="BondType" >
                <enumerator type="int" >0</enumerator>
               </bond_type>
               <polymeric type="bool" >false</polymeric>
               <annotations type="Annotations" >
                <annotations type="Container" >
                 <count type="int" >0</count>
                </annotations>
               </annotations>
              </value>
             </edge>
             <node1 type="int" >2</node1>
             <node2 type="int" >5</node2>
            </item>
            <item type="PersistenceGraphEdge" >
             <edge type="Handle" >
              <serial_number type="int" >299</serial_number>
              <value type="Bond3d" >
               <bond_type type="BondType" >
                <enumerator type="int" >0</enumerator>
               </bond_type>
               <polymeric type="bool" >false</polymeric>
               <annotations type="Annotations" >
                <annotations type="Container" >
                 <count type="int" >0</count>
                </annotations>
               </annotations>
              </value>
             </edge>
             <node1 type="int" >3</node1>
             <node2 type="int" >4</node2>
            </item>
            <item type="PersistenceGraphEdge" >
             <edge type="Handle" >
              <serial_number type="int" >300</serial_number>
              <value type="Bond3d" >
               <bond_type type="BondType" >
                <enumerator type="int" >0</enumerator>
               </bond_type>
               <polymeric type="bool" >false</polymeric>
               <annotations type="Annotations" >
                <annotations type="Container" >
                 <count type="int" >0</count>
                </annotations>
               </annotations>
              </value>
             </edge>
             <node1 type="int" >3</node1>
             <node2 type="int" >6</node2>
            </item>
            <item type="PersistenceGraphEdge" >
             <edge type="Handle" >
              <serial_number type="int" >301</serial_number>
              <value type="Bond3d" >
               <bond_type type="BondType" >
                <enumerator type="int" >0</enumerator>
               </bond_type>
               <polymeric type="bool" >false</polymeric>
               <annotations type="Annotations" >
                <annotations type="Container" >
                 <count type="int" >0</count>
                </annotations>
               </annotations>
              </value>
             </edge>
             <node1 type="int" >4</node1>
             <node2 type="int" >23</node2>
            </item>
            <item type="PersistenceGraphEdge" >
             <edge type="Handle" >
              <serial_number type="int" >302</serial_number>
              <value type="Bond3d" >
               <bond_type type="BondType" >
                <enumerator type="int" >0</enumerator>
               </bond_type>
               <polymeric type="bool" >false</polymeric>
               <annotations type="Annotations" >
                <annotations type="Container" >
                 <count type="int" >0</count>
                </annotations>
               </annotations>
              </value>
             </edge>
             <node1 type="int" >5</node1>
             <node2 type="int" >6</node2>
            </item>
            <item type="PersistenceGraphEdge" >
             <edge type="Handle" >
              <serial_number type="int" >303</serial_number>
              <value type="Bond3d" >
               <bond_type type="BondType" >
                <enumerator type="int" >0</enumerator>
               </bond_type>
               <polymeric type="bool" >false</polymeric>
               <annotations type="Annotations" >
                <annotations type="Container" >
                 <count type="int" >0</count>
                </annotations>
               </annotations>
              </value>
             </edge>
             <node1 type="int" >5</node1>
             <node2 type="int" >7</node2>
            </item>
            <item type="PersistenceGraphEdge" >
             <edge type="Handle" >
              <serial_number type="int" >304</serial_number>
              <value type="Bond3d" >
               <bond_type type="BondType" >
                <enumerator type="int" >0</enumerator>
               </bond_type>
               <polymeric type="bool" >false</polymeric>
               <annotations type="Annotations" >
                <annotations type="Container" >
                 <count type="int" >0</count>
                </annotations>
               </annotations>
              </value>
             </edge>
             <node1 type="int" >5</node1>
             <node2 type="int" >11</node2>
            </item>
            <item type="PersistenceGraphEdge" >
             <edge type="Handle" >
              <serial_number type="int" >305</serial_number>
              <value type="Bond3d" >
               <bond_type type="BondType" >
                <enumerator type="int" >0</enumerator>
               </bond_type>
               <polymeric type="bool" >false</polymeric>
               <annotations type="Annotations" >
                <annotations type="Container" >
                 <count type="int" >0</count>
                </annotations>
               </annotations>
              </value>
             </edge>
             <node1 type="int" >6</node1>
             <node2 type="int" >15</node2>
            </item>
            <item type="PersistenceGraphEdge" >
             <edge type="Handle" >
              <serial_number type="int" >306</serial_number>
              <value type="Bond3d" >
               <bond_type type="BondType" >
                <enumerator type="int" >0</enumerator>
               </bond_type>
               <polymeric type="bool" >false</polymeric>
               <annotations type="Annotations" >
                <annotations type="Container" >
                 <count type="int" >0</count>
                </annotations>
               </annotations>
              </value>
             </edge>
             <node1 type="int" >6</node1>
             <node2 type="int" >19</node2>
            </item>
            <item type="PersistenceGraphEdge" >
             <edge type="Handle" >
              <serial_number type="int" >307</serial_number>
              <value type="Bond3d" >
               <bond_type type="BondType" >
                <enumerator type="int" >0</enumerator>
               </bond_type>
               <polymeric type="bool" >false</polymeric>
               <annotations type="Annotations" >
                <annotations type="Container" >
                 <count type="int" >0</count>
                </annotations>
               </annotations>
              </value>
             </edge>
             <node1 type="int" >7</node1>
             <node2 type="int" >8</node2>
            </item>
            <item type="PersistenceGraphEdge" >
             <edge type="Handle" >
              <serial_number type="int" >308</serial_number>
              <value type="Bond3d" >
               <bond_type type="BondType" >
                <enumerator type="int" >0</enumerator>
               </bond_type>
               <polymeric type="bool" >false</polymeric>
               <annotations type="Annotations" >
                <annotations type="Container" >
                 <count type="int" >0</count>
                </annotations>
               </annotations>
              </value>
             </edge>
             <node1 type="int" >7</node1>
             <node2 type="int" >9</node2>
            </item>
            <item type="PersistenceGraphEdge" >
             <edge type="Handle" >
              <serial_number type="int" >309</serial_number>
              <value type="Bond3d" >
               <bond_type type="BondType" >
                <enumerator type="int" >0</enumerator>
               </bond_type>
               <polymeric type="bool" >false</polymeric>
               <annotations type="Annotations" >
                <annotations type="Container" >
                 <count type="int" >0</count>
                </annotations>
               </annotations>
              </value>
             </edge>
             <node1 type="int" >7</node1>
             <node2 type="int" >10</node2>
            </item>
            <item type="PersistenceGraphEdge" >
             <edge type="Handle" >
              <serial_number type="int" >310</serial_number>
              <value type="Bond3d" >
               <bond_type type="BondType" >
                <enumerator type="int" >0</enumerator>
               </bond_type>
               <polymeric type="bool" >false</polymeric>
               <annotations type="Annotations" >
                <annotations type="Container" >
                 <count type="int" >0</count>
                </annotations>
               </annotations>
              </value>
             </edge>
             <node1 type="int" >11</node1>
             <node2 type="int" >12</node2>
            </item>
            <item type="PersistenceGraphEdge" >
             <edge type="Handle" >
              <serial_number type="int" >311</serial_number>
              <value type="Bond3d" >
               <bond_type type="BondType" >
                <enumerator type="int" >0</enumerator>
               </bond_type>
               <polymeric type="bool" >false</polymeric>
               <annotations type="Annotations" >
                <annotations type="Container" >
                 <count type="int" >0</count>
                </annotations>
               </annotations>
              </value>
             </edge>
             <node1 type="int" >11</node1>
             <node2 type="int" >13</node2>
            </item>
            <item type="PersistenceGraphEdge" >
             <edge type="Handle" >
              <serial_number type="int" >312</serial_number>
              <value type="Bond3d" >
               <bond_type type="BondType" >
                <enumerator type="int" >0</enumerator>
               </bond_type>
               <polymeric type="bool" >false</polymeric>
               <annotations type="Annotations" >
                <annotations type="Container" >
                 <count type="int" >0</count>
                </annotations>
               </annotations>
              </value>
             </edge>
             <node1 type="int" >11</node1>
             <node2 type="int" >14</node2>
            </item>
            <item type="PersistenceGraphEdge" >
             <edge type="Handle" >
              <serial_number type="int" >313</serial_number>
              <value type="Bond3d" >
               <bond_type type="BondType" >
                <enumerator type="int" >0</enumerator>
               </bond_type>
               <polymeric type="bool" >false</polymeric>
               <annotations type="Annotations" >
                <annotations type="Container" >
                 <count type="int" >0</count>
                </annotations>
               </annotations>
              </value>
             </edge>
             <node1 type="int" >15</node1>
             <node2 type="int" >16</node2>
            </item>
            <item type="PersistenceGraphEdge" >
             <edge type="Handle" >
              <serial_number type="int" >314</serial_number>
              <value type="Bond3d" >
               <bond_type type="BondType" >
                <enumerator type="int" >0</enumerator>
               </bond_type>
               <polymeric type="bool" >false</polymeric>
               <annotations type="Annotations" >
                <annotations type="Container" >
                 <count type="int" >0</count>
                </annotations>
               </annotations>
              </value>
             </edge>
             <node1 type="int" >15</node1>
             <node2 type="int" >17</node2>
            </item>
            <item type="PersistenceGraphEdge" >
             <edge type="Handle" >
              <serial_number type="int" >315</serial_number>
              <value type="Bond3d" >
               <bond_type type="BondType" >
                <enumerator type="int" >0</enumerator>
               </bond_type>
               <polymeric type="bool" >false</polymeric>
               <annotations type="Annotations" >
                <annotations type="Container" >
                 <count type="int" >0</count>
                </annotations>
               </annotations>
              </value>
             </edge>
             <node1 type="int" >15</node1>
             <node2 type="int" >18</node2>
            </item>
            <item type="PersistenceGraphEdge" >
             <edge type="Handle" >
              <serial_number type="int" >316</serial_number>
              <value type="Bond3d" >
               <bond_type type="BondType" >
                <enumerator type="int" >0</enumerator>
               </bond_type>
               <polymeric type="bool" >false</polymeric>
               <annotations type="Annotations" >
                <annotations type="Container" >
                 <count type="int" >0</count>
                </annotations>
               </annotations>
              </value>
             </edge>
             <node1 type="int" >19</node1>
             <node2 type="int" >20</node2>
            </item>
            <item type="PersistenceGraphEdge" >
             <edge type="Handle" >
              <serial_number type="int" >317</serial_number>
              <value type="Bond3d" >
               <bond_type type="BondType" >
                <enumerator type="int" >0</enumerator>
               </bond_type>
               <polymeric type="bool" >false</polymeric>
               <annotations type="Annotations" >
                <annotations type="Container" >
                 <count type="int" >0</count>
                </annotations>
               </annotations>
              </value>
             </edge>
             <node1 type="int" >19</node1>
             <node2 type="int" >21</node2>
            </item>
            <item type="PersistenceGraphEdge" >
             <edge type="Handle" >
              <serial_number type="int" >318</serial_number>
              <value type="Bond3d" >
               <bond_type type="BondType" >
                <enumerator type="int" >0</enumerator>
               </bond_type>
               <polymeric type="bool" >false</polymeric>
               <annotations type="Annotations" >
                <annotations type="Container" >
                 <count type="int" >0</count>
                </annotations>
               </annotations>
              </value>
             </edge>
             <node1 type="int" >19</node1>
             <node2 type="int" >22</node2>
            </item>
            <item type="PersistenceGraphEdge" >
             <edge type="Handle" >
              <serial_number type="int" >319</serial_number>
              <value type="Bond3d" >
               <bond_type type="BondType" >
                <enumerator type="int" >0</enumerator>
               </bond_type>
               <polymeric type="bool" >false</polymeric>
               <annotations type="Annotations" >
                <annotations type="Container" >
                 <count type="int" >0</count>
                </annotations>
               </annotations>
              </value>
             </edge>
             <node1 type="int" >23</node1>
             <node2 type="int" >24</node2>
            </item>
            <item type="PersistenceGraphEdge" >
             <edge type="Handle" >
              <serial_number type="int" >320</serial_number>
              <value type="Bond3d" >
               <bond_type type="BondType" >
                <enumerator type="int" >0</enumerator>
               </bond_type>
               <polymeric type="bool" >false</polymeric>
               <annotations type="Annotations" >
                <annotations type="Container" >
                 <count type="int" >0</count>
                </annotations>
               </annotations>
              </value>
             </edge>
             <node1 type="int" >23</node1>
             <node2 type="int" >45</node2>
            </item>
            <item type="PersistenceGraphEdge" >
             <edge type="Handle" >
              <serial_number type="int" >321</serial_number>
              <value type="Bond3d" >
               <bond_type type="BondType" >
                <enumerator type="int" >0</enumerator>
               </bond_type>
               <polymeric type="bool" >false</polymeric>
               <annotations type="Annotations" >
                <annotations type="Container" >
                 <count type="int" >0</count>
                </annotations>
               </annotations>
              </value>
             </edge>
             <node1 type="int" >24</node1>
             <node2 type="int" >25</node2>
            </item>
            <item type="PersistenceGraphEdge" >
             <edge type="Handle" >
              <serial_number type="int" >322</serial_number>
              <value type="Bond3d" >
               <bond_type type="BondType" >
                <enumerator type="int" >0</enumerator>
               </bond_type>
               <polymeric type="bool" >false</polymeric>
               <annotations type="Annotations" >
                <annotations type="Container" >
                 <count type="int" >0</count>
                </annotations>
               </annotations>
              </value>
             </edge>
             <node1 type="int" >24</node1>
             <node2 type="int" >26</node2>
            </item>
            <item type="PersistenceGraphEdge" >
             <edge type="Handle" >
              <serial_number type="int" >323</serial_number>
              <value type="Bond3d" >
               <bond_type type="BondType" >
                <enumerator type="int" >0</enumerator>
               </bond_type>
               <polymeric type="bool" >false</polymeric>
               <annotations type="Annotations" >
                <annotations type="Container" >
                 <count type="int" >0</count>
                </annotations>
               </annotations>
              </value>
             </edge>
             <node1 type="int" >26</node1>
             <node2 type="int" >27</node2>
            </item>
            <item type="PersistenceGraphEdge" >
             <edge type="Handle" >
              <serial_number type="int" >324</serial_number>
              <value type="Bond3d" >
               <bond_type type="BondType" >
                <enumerator type="int" >0</enumerator>
               </bond_type>
               <polymeric type="bool" >false</polymeric>
               <annotations type="Annotations" >
                <annotations type="Container" >
                 <count type="int" >0</count>
                </annotations>
               </annotations>
              </value>
             </edge>
             <node1 type="int" >26</node1>
             <node2 type="int" >28</node2>
            </item>
            <item type="PersistenceGraphEdge" >
             <edge type="Handle" >
              <serial_number type="int" >325</serial_number>
              <value type="Bond3d" >
               <bond_type type="BondType" >
                <enumerator type="int" >0</enumerator>
               </bond_type>
               <polymeric type="bool" >false</polymeric>
               <annotations type="Annotations" >
                <annotations type="Container" >
                 <count type="int" >0</count>
                </annotations>
               </annotations>
              </value>
             </edge>
             <node1 type="int" >28</node1>
             <node2 type="int" >29</node2>
            </item>
            <item type="PersistenceGraphEdge" >
             <edge type="Handle" >
              <serial_number type="int" >326</serial_number>
              <value type="Bond3d" >
               <bond_type type="BondType" >
                <enumerator type="int" >0</enumerator>
               </bond_type>
               <polymeric type="bool" >false</polymeric>
               <annotations type="Annotations" >
                <annotations type="Container" >
                 <count type="int" >0</count>
                </annotations>
               </annotations>
              </value>
             </edge>
             <node1 type="int" >28</node1>
             <node2 type="int" >46</node2>
            </item>
            <item type="PersistenceGraphEdge" >
             <edge type="Handle" >
              <serial_number type="int" >327</serial_number>
              <value type="Bond3d" >
               <bond_type type="BondType" >
                <enumerator type="int" >0</enumerator>
               </bond_type>
               <polymeric type="bool" >false</polymeric>
               <annotations type="Annotations" >
                <annotations type="Container" >
                 <count type="int" >0</count>
                </annotations>
               </annotations>
              </value>
             </edge>
             <node1 type="int" >29</node1>
             <node2 type="int" >30</node2>
            </item>
            <item type="PersistenceGraphEdge" >
             <edge type="Handle" >
              <serial_number type="int" >328</serial_number>
              <value type="Bond3d" >
               <bond_type type="BondType" >
                <enumerator type="int" >0</enumerator>
               </bond_type>
               <polymeric type="bool" >false</polymeric>
               <annotations type="Annotations" >
                <annotations type="Container" >
                 <count type="int" >0</count>
                </annotations>
               </annotations>
              </value>
             </edge>
             <node1 type="int" >29</node1>
             <node2 type="int" >31</node2>
            </item>
            <item type="PersistenceGraphEdge" >
             <edge type="Handle" >
              <serial_number type="int" >329</serial_number>
              <value type="Bond3d" >
               <bond_type type="BondType" >
                <enumerator type="int" >0</enumerator>
               </bond_type>
               <polymeric type="bool" >false</polymeric>
               <annotations type="Annotations" >
                <annotations type="Container" >
                 <count type="int" >0</count>
                </annotations>
               </annotations>
              </value>
             </edge>
             <node1 type="int" >31</node1>
             <node2 type="int" >32</node2>
            </item>
            <item type="PersistenceGraphEdge" >
             <edge type="Handle" >
              <serial_number type="int" >330</serial_number>
              <value type="Bond3d" >
               <bond_type type="BondType" >
                <enumerator type="int" >0</enumerator>
               </bond_type>
               <polymeric type="bool" >false</polymeric>
               <annotations type="Annotations" >
                <annotations type="Container" >
                 <count type="int" >0</count>
                </annotations>
               </annotations>
              </value>
             </edge>
             <node1 type="int" >31</node1>
             <node2 type="int" >33</node2>
            </item>
            <item type="PersistenceGraphEdge" >
             <edge type="Handle" >
              <serial_number type="int" >331</serial_number>
              <value type="Bond3d" >
               <bond_type type="BondType" >
                <enumerator type="int" >0</enumerator>
               </bond_type>
               <polymeric type="bool" >false</polymeric>
               <annotations type="Annotations" >
                <annotations type="Container" >
                 <count type="int" >0</count>
                </annotations>
               </annotations>
              </value>
             </edge>
             <node1 type="int" >33</node1>
             <node2 type="int" >34</node2>
            </item>
            <item type="PersistenceGraphEdge" >
             <edge type="Handle" >
              <serial_number type="int" >332</serial_number>
              <value type="Bond3d" >
               <bond_type type="BondType" >
                <enumerator type="int" >0</enumerator>
               </bond_type>
               <polymeric type="bool" >false</polymeric>
               <annotations type="Annotations" >
                <annotations type="Container" >
                 <count type="int" >0</count>
                </annotations>
               </annotations>
              </value>
             </edge>
             <node1 type="int" >33</node1>
             <node2 type="int" >47</node2>
            </item>
            <item type="PersistenceGraphEdge" >
             <edge type="Handle" >
              <serial_number type="int" >333</serial_number>
              <value type="Bond3d" >
               <bond_type type="BondType" >
                <enumerator type="int" >0</enumerator>
               </bond_type>
               <polymeric type="bool" >false</polymeric>
               <annotations type="Annotations" >
                <annotations type="Container" >
                 <count type="int" >0</count>
                </annotations>
               </annotations>
              </value>
             </edge>
             <node1 type="int" >34</node1>
             <node2 type="int" >35</node2>
            </item>
            <item type="PersistenceGraphEdge" >
             <edge type="Handle" >
              <serial_number type="int" >334</serial_number>
              <value type="Bond3d" >
               <bond_type type="BondType" >
                <enumerator type="int" >0</enumerator>
               </bond_type>
               <polymeric type="bool" >false</polymeric>
               <annotations type="Annotations" >
                <annotations type="Container" >
                 <count type="int" >0</count>
                </annotations>
               </annotations>
              </value>
             </edge>
             <node1 type="int" >34</node1>
             <node2 type="int" >36</node2>
            </item>
            <item type="PersistenceGraphEdge" >
             <edge type="Handle" >
              <serial_number type="int" >335</serial_number>
              <value type="Bond3d" >
               <bond_type type="BondType" >
                <enumerator type="int" >0</enumerator>
               </bond_type>
               <polymeric type="bool" >false</polymeric>
               <annotations type="Annotations" >
                <annotations type="Container" >
                 <count type="int" >0</count>
                </annotations>
               </annotations>
              </value>
             </edge>
             <node1 type="int" >36</node1>
             <node2 type="int" >37</node2>
            </item>
            <item type="PersistenceGraphEdge" >
             <edge type="Handle" >
              <serial_number type="int" >336</serial_number>
              <value type="Bond3d" >
               <bond_type type="BondType" >
                <enumerator type="int" >0</enumerator>
               </bond_type>
               <polymeric type="bool" >false</polymeric>
               <annotations type="Annotations" >
                <annotations type="Container" >
                 <count type="int" >0</count>
                </annotations>
               </annotations>
              </value>
             </edge>
             <node1 type="int" >36</node1>
             <node2 type="int" >38</node2>
            </item>
            <item type="PersistenceGraphEdge" >
             <edge type="Handle" >
              <serial_number type="int" >337</serial_number>
              <value type="Bond3d" >
               <bond_type type="BondType" >
                <enumerator type="int" >0</enumerator>
               </bond_type>
               <polymeric type="bool" >false</polymeric>
               <annotations type="Annotations" >
                <annotations type="Container" >
                 <count type="int" >0</count>
                </annotations>
               </annotations>
              </value>
             </edge>
             <node1 type="int" >38</node1>
             <node2 type="int" >39</node2>
            </item>
            <item type="PersistenceGraphEdge" >
             <edge type="Handle" >
              <serial_number type="int" >338</serial_number>
              <value type="Bond3d" >
               <bond_type type="BondType" >
                <enumerator type="int" >0</enumerator>
               </bond_type>
               <polymeric type="bool" >false</polymeric>
               <annotations type="Annotations" >
                <annotations type="Container" >
                 <count type="int" >0</count>
                </annotations>
               </annotations>
              </value>
             </edge>
             <node1 type="int" >38</node1>
             <node2 type="int" >40</node2>
            </item>
            <item type="PersistenceGraphEdge" >
             <edge type="Handle" >
              <serial_number type="int" >339</serial_number>
              <value type="Bond3d" >
               <bond_type type="BondType" >
                <enumerator type="int" >0</enumerator>
               </bond_type>
               <polymeric type="bool" >false</polymeric>
               <annotations type="Annotations" >
                <annotations type="Container" >
                 <count type="int" >0</count>
                </annotations>
               </annotations>
              </value>
             </edge>
             <node1 type="int" >40</node1>
             <node2 type="int" >41</node2>
            </item>
            <item type="PersistenceGraphEdge" >
             <edge type="Handle" >
              <serial_number type="int" >340</serial_number>
              <value type="Bond3d" >
               <bond_type type="BondType" >
                <enumerator type="int" >0</enumerator>
               </bond_type>
               <polymeric type="bool" >false</polymeric>
               <annotations type="Annotations" >
                <annotations type="Container" >
                 <count type="int" >0</count>
                </annotations>
               </annotations>
              </value>
             </edge>
             <node1 type="int" >40</node1>
             <node2 type="int" >47</node2>
            </item>
            <item type="PersistenceGraphEdge" >
             <edge type="Handle" >
              <serial_number type="int" >341</serial_number>
              <value type="Bond3d" >
               <bond_type type="BondType" >
                <enumerator type="int" >0</enumerator>
               </bond_type>
               <polymeric type="bool" >false</polymeric>
               <annotations type="Annotations" >
                <annotations type="Container" >
                 <count type="int" >0</count>
                </annotations>
               </annotations>
              </value>
             </edge>
             <node1 type="int" >41</node1>
             <node2 type="int" >42</node2>
            </item>
            <item type="PersistenceGraphEdge" >
             <edge type="Handle" >
              <serial_number type="int" >342</serial_number>
              <value type="Bond3d" >
               <bond_type type="BondType" >
                <enumerator type="int" >0</enumerator>
               </bond_type>
               <polymeric type="bool" >false</polymeric>
               <annotations type="Annotations" >
                <annotations type="Container" >
                 <count type="int" >0</count>
                </annotations>
               </annotations>
              </value>
             </edge>
             <node1 type="int" >41</node1>
             <node2 type="int" >43</node2>
            </item>
            <item type="PersistenceGraphEdge" >
             <edge type="Handle" >
              <serial_number type="int" >343</serial_number>
              <value type="Bond3d" >
               <bond_type type="BondType" >
                <enumerator type="int" >0</enumerator>
               </bond_type>
               <polymeric type="bool" >false</polymeric>
               <annotations type="Annotations" >
                <annotations type="Container" >
                 <count type="int" >0</count>
                </annotations>
               </annotations>
              </value>
             </edge>
             <node1 type="int" >43</node1>
             <node2 type="int" >44</node2>
            </item>
            <item type="PersistenceGraphEdge" >
             <edge type="Handle" >
              <serial_number type="int" >344</serial_number>
              <value type="Bond3d" >
               <bond_type type="BondType" >
                <enumerator type="int" >0</enumerator>
               </bond_type>
               <polymeric type="bool" >false</polymeric>
               <annotations type="Annotations" >
                <annotations type="Container" >
                 <count type="int" >0</count>
                </annotations>
               </annotations>
              </value>
             </edge>
             <node1 type="int" >43</node1>
             <node2 type="int" >45</node2>
            </item>
            <item type="PersistenceGraphEdge" >
             <edge type="Handle" >
              <serial_number type="int" >345</serial_number>
              <value type="Bond3d" >
               <bond_type type="BondType" >
                <enumerator type="int" >0</enumerator>
               </bond_type>
               <polymeric type="bool" >false</polymeric>
               <annotations type="Annotations" >
                <annotations type="Container" >
                 <count type="int" >0</count>
                </annotations>
               </annotations>
              </value>
             </edge>
             <node1 type="int" >45</node1>
             <node2 type="int" >46</node2>
            </item>
            <item type="PersistenceGraphEdge" >
             <edge type="Handle" >
              <serial_number type="int" >346</serial_number>
              <value type="Bond3d" >
               <bond_type type="BondType" >
                <enumerator type="int" >0</enumerator>
               </bond_type>
               <polymeric type="bool" >false</polymeric>
               <annotations type="Annotations" >
                <annotations type="Container" >
                 <count type="int" >0</count>
                </annotations>
               </annotations>
              </value>
             </edge>
             <node1 type="int" >46</node1>
             <node2 type="int" >47</node2>
            </item>
           </bonds>
          </value>
         </molecule>
         <disorder_assemblies type="Container" >
          <count type="int" >0</count>
         </disorder_assemblies>
         <crystal_symmetry_match type="Handle" >
          <serial_number type="int" >347</serial_number>
          <value type="CrystalSymmetryMatch" >
           <crystal_symmetry_match_data type="Container" >
            <count type="int" >48</count>
            <item type="Pair" >
             <first type="Handle" >
              <serial_number type="int" >7</serial_number>
             </first>
             <second type="CrystalSymmetryMatchData" >
              <base type="Handle" >
               <serial_number type="int" >7</serial_number>
              </base>
              <transformation type="Handle" >
               <serial_number type="int" >348</serial_number>
               <value type="CrystalSymmetryTransformation" >
                <symmetry_operator type="CrystalSymmetryOperator" >
                 <rotation type="Matrix" >
                  <matrix type="Vector" >
                   <vector type="Container" >
                    <count type="int" >9</count>
                    <item type="int" >1</item>
                    <item type="int" >0</item>
                    <item type="int" >0</item>
                    <item type="int" >0</item>
                    <item type="int" >1</item>
                    <item type="int" >0</item>
                    <item type="int" >0</item>
                    <item type="int" >0</item>
                    <item type="int" >1</item>
                   </vector>
                  </matrix>
                 </rotation>
                 <translation type="Vector" >
                  <vector type="Container" >
                   <count type="int" >3</count>
                   <item type="float" >0</item>
                   <item type="float" >0</item>
                   <item type="float" >0</item>
                  </vector>
                 </translation>
                </symmetry_operator>
                <unit_cell_translation type="Vector" >
                 <vector type="Container" >
                  <count type="int" >3</count>
                  <item type="int" >0</item>
                  <item type="int" >0</item>
                  <item type="int" >0</item>
                 </vector>
                </unit_cell_translation>
               </value>
              </transformation>
              <site_order type="int" >1</site_order>
             </second>
            </item>
            <item type="Pair" >
             <first type="Handle" >
              <serial_number type="int" >13</serial_number>
             </first>
             <second type="CrystalSymmetryMatchData" >
              <base type="Handle" >
               <serial_number type="int" >13</serial_number>
              </base>
              <transformation type="Handle" >
               <serial_number type="int" >348</serial_number>
              </transformation>
              <site_order type="int" >1</site_order>
             </second>
            </item>
            <item type="Pair" >
             <first type="Handle" >
              <serial_number type="int" >19</serial_number>
             </first>
             <second type="CrystalSymmetryMatchData" >
              <base type="Handle" >
               <serial_number type="int" >19</serial_number>
              </base>
              <transformation type="Handle" >
               <serial_number type="int" >348</serial_number>
              </transformation>
              <site_order type="int" >1</site_order>
             </second>
            </item>
            <item type="Pair" >
             <first type="Handle" >
              <serial_number type="int" >25</serial_number>
             </first>
             <second type="CrystalSymmetryMatchData" >
              <base type="Handle" >
               <serial_number type="int" >25</serial_number>
              </base>
              <transformation type="Handle" >
               <serial_number type="int" >348</serial_number>
              </transformation>
              <site_order type="int" >1</site_order>
             </second>
            </item>
            <item type="Pair" >
             <first type="Handle" >
              <serial_number type="int" >31</serial_number>
             </first>
             <second type="CrystalSymmetryMatchData" >
              <base type="Handle" >
               <serial_number type="int" >31</serial_number>
              </base>
              <transformation type="Handle" >
               <serial_number type="int" >348</serial_number>
              </transformation>
              <site_order type="int" >1</site_order>
             </second>
            </item>
            <item type="Pair" >
             <first type="Handle" >
              <serial_number type="int" >37</serial_number>
             </first>
             <second type="CrystalSymmetryMatchData" >
              <base type="Handle" >
               <serial_number type="int" >37</serial_number>
              </base>
              <transformation type="Handle" >
               <serial_number type="int" >348</serial_number>
              </transformation>
              <site_order type="int" >1</site_order>
             </second>
            </item>
            <item type="Pair" >
             <first type="Handle" >
              <serial_number type="int" >43</serial_number>
             </first>
             <second type="CrystalSymmetryMatchData" >
              <base type="Handle" >
               <serial_number type="int" >43</serial_number>
              </base>
              <transformation type="Handle" >
               <serial_number type="int" >348</serial_number>
              </transformation>
              <site_order type="int" >1</site_order>
             </second>
            </item>
            <item type="Pair" >
             <first type="Handle" >
              <serial_number type="int" >49</serial_number>
             </first>
             <second type="CrystalSymmetryMatchData" >
              <base type="Handle" >
               <serial_number type="int" >49</serial_number>
              </base>
              <transformation type="Handle" >
               <serial_number type="int" >348</serial_number>
              </transformation>
              <site_order type="int" >1</site_order>
             </second>
            </item>
            <item type="Pair" >
             <first type="Handle" >
              <serial_number type="int" >55</serial_number>
             </first>
             <second type="CrystalSymmetryMatchData" >
              <base type="Handle" >
               <serial_number type="int" >55</serial_number>
              </base>
              <transformation type="Handle" >
               <serial_number type="int" >348</serial_number>
              </transformation>
              <site_order type="int" >1</site_order>
             </second>
            </item>
            <item type="Pair" >
             <first type="Handle" >
              <serial_number type="int" >61</serial_number>
             </first>
             <second type="CrystalSymmetryMatchData" >
              <base type="Handle" >
               <serial_number type="int" >61</serial_number>
              </base>
              <transformation type="Handle" >
               <serial_number type="int" >348</serial_number>
              </transformation>
              <site_order type="int" >1</site_order>
             </second>
            </item>
            <item type="Pair" >
             <first type="Handle" >
              <serial_number type="int" >67</serial_number>
             </first>
             <second type="CrystalSymmetryMatchData" >
              <base type="Handle" >
               <serial_number type="int" >67</serial_number>
              </base>
              <transformation type="Handle" >
               <serial_number type="int" >348</serial_number>
              </transformation>
              <site_order type="int" >1</site_order>
             </second>
            </item>
            <item type="Pair" >
             <first type="Handle" >
              <serial_number type="int" >73</serial_number>
             </first>
             <second type="CrystalSymmetryMatchData" >
              <base type="Handle" >
               <serial_number type="int" >73</serial_number>
              </base>
              <transformation type="Handle" >
               <serial_number type="int" >348</serial_number>
              </transformation>
              <site_order type="int" >1</site_order>
             </second>
            </item>
            <item type="Pair" >
             <first type="Handle" >
              <serial_number type="int" >79</serial_number>
             </first>
             <second type="CrystalSymmetryMatchData" >
              <base type="Handle" >
               <serial_number type="int" >79</serial_number>
              </base>
              <transformation type="Handle" >
               <serial_number type="int" >348</serial_number>
              </transformation>
              <site_order type="int" >1</site_order>
             </second>
            </item>
            <item type="Pair" >
             <first type="Handle" >
              <serial_number type="int" >85</serial_number>
             </first>
             <second type="CrystalSymmetryMatchData" >
              <base type="Handle" >
               <serial_number type="int" >85</serial_number>
              </base>
              <transformation type="Handle" >
               <serial_number type="int" >348</serial_number>
              </transformation>
              <site_order type="int" >1</site_order>
             </second>
            </item>
            <item type="Pair" >
             <first type="Handle" >
              <serial_number type="int" >91</serial_number>
             </first>
             <second type="CrystalSymmetryMatchData" >
              <base type="Handle" >
               <serial_number type="int" >91</serial_number>
              </base>
              <transformation type="Handle" >
               <serial_number type="int" >348</serial_number>
              </transformation>
              <site_order type="int" >1</site_order>
             </second>
            </item>
            <item type="Pair" >
             <first type="Handle" >
              <serial_number type="int" >97</serial_number>
             </first>
             <second type="CrystalSymmetryMatchData" >
              <base type="Handle" >
               <serial_number type="int" >97</serial_number>
              </base>
              <transformation type="Handle" >
               <serial_number type="int" >348</serial_number>
              </transformation>
              <site_order type="int" >1</site_order>
             </second>
            </item>
            <item type="Pair" >
             <first type="Handle" >
              <serial_number type="int" >103</serial_number>
             </first>
             <second type="CrystalSymmetryMatchData" >
              <base type="Handle" >
               <serial_number type="int" >103</serial_number>
              </base>
              <transformation type="Handle" >
               <serial_number type="int" >348</serial_number>
              </transformation>
              <site_order type="int" >1</site_order>
             </second>
            </item>
            <item type="Pair" >
             <first type="Handle" >
              <serial_number type="int" >109</serial_number>
             </first>
             <second type="CrystalSymmetryMatchData" >
              <base type="Handle" >
               <serial_number type="int" >109</serial_number>
              </base>
              <transformation type="Handle" >
               <serial_number type="int" >348</serial_number>
              </transformation>
              <site_order type="int" >1</site_order>
             </second>
            </item>
            <item type="Pair" >
             <first type="Handle" >
              <serial_number type="int" >115</serial_number>
             </first>
             <second type="CrystalSymmetryMatchData" >
              <base type="Handle" >
               <serial_number type="int" >115</serial_number>
              </base>
              <transformation type="Handle" >
               <serial_number type="int" >348</serial_number>
              </transformation>
              <site_order type="int" >1</site_order>
             </second>
            </item>
            <item type="Pair" >
             <first type="Handle" >
              <serial_number type="int" >121</serial_number>
             </first>
             <second type="CrystalSymmetryMatchData" >
              <base type="Handle" >
               <serial_number type="int" >121</serial_number>
              </base>
              <transformation type="Handle" >
               <serial_number type="int" >348</serial_number>
              </transformation>
              <site_order type="int" >1</site_order>
             </second>
            </item>
            <item type="Pair" >
             <first type="Handle" >
              <serial_number type="int" >127</serial_number>
             </first>
             <second type="CrystalSymmetryMatchData" >
              <base type="Handle" >
               <serial_number type="int" >127</serial_number>
              </base>
              <transformation type="Handle" >
               <serial_number type="int" >348</serial_number>
              </transformation>
              <site_order type="int" >1</site_order>
             </second>
            </item>
            <item type="Pair" >
             <first type="Handle" >
              <serial_number type="int" >133</serial_number>
             </first>
             <second type="CrystalSymmetryMatchData" >
              <base type="Handle" >
               <serial_number type="int" >133</serial_number>
              </base>
              <transformation type="Handle" >
               <serial_number type="int" >348</serial_number>
              </transformation>
              <site_order type="int" >1</site_order>
             </second>
            </item>
            <item type="Pair" >
             <first type="Handle" >
              <serial_number type="int" >139</serial_number>
             </first>
             <second type="CrystalSymmetryMatchData" >
              <base type="Handle" >
               <serial_number type="int" >139</serial_number>
              </base>
              <transformation type="Handle" >
               <serial_number type="int" >348</serial_number>
              </transformation>
              <site_order type="int" >1</site_order>
             </second>
            </item>
            <item type="Pair" >
             <first type="Handle" >
              <serial_number type="int" >145</serial_number>
             </first>
             <second type="CrystalSymmetryMatchData" >
              <base type="Handle" >
               <serial_number type="int" >145</serial_number>
              </base>
              <transformation type="Handle" >
               <serial_number type="int" >348</serial_number>
              </transformation>
              <site_order type="int" >1</site_order>
             </second>
            </item>
            <item type="Pair" >
             <first type="Handle" >
              <serial_number type="int" >151</serial_number>
             </first>
             <second type="CrystalSymmetryMatchData" >
              <base type="Handle" >
               <serial_number type="int" >151</serial_number>
              </base>
              <transformation type="Handle" >
               <serial_number type="int" >348</serial_number>
              </transformation>
              <site_order type="int" >1</site_order>
             </second>
            </item>
            <item type="Pair" >
             <first type="Handle" >
              <serial_number type="int" >157</serial_number>
             </first>
             <second type="CrystalSymmetryMatchData" >
              <base type="Handle" >
               <serial_number type="int" >157</serial_number>
              </base>
              <transformation type="Handle" >
               <serial_number type="int" >348</serial_number>
              </transformation>
              <site_order type="int" >1</site_order>
             </second>
            </item>
            <item type="Pair" >
             <first type="Handle" >
              <serial_number type="int" >163</serial_number>
             </first>
             <second type="CrystalSymmetryMatchData" >
              <base type="Handle" >
               <serial_number type="int" >163</serial_number>
              </base>
              <transformation type="Handle" >
               <serial_number type="int" >348</serial_number>
              </transformation>
              <site_order type="int" >1</site_order>
             </second>
            </item>
            <item type="Pair" >
             <first type="Handle" >
              <serial_number type="int" >169</serial_number>
             </first>
             <second type="CrystalSymmetryMatchData" >
              <base type="Handle" >
               <serial_number type="int" >169</serial_number>
              </base>
              <transformation type="Handle" >
               <serial_number type="int" >348</serial_number>
              </transformation>
              <site_order type="int" >1</site_order>
             </second>
            </item>
            <item type="Pair" >
             <first type="Handle" >
              <serial_number type="int" >175</serial_number>
             </first>
             <second type="CrystalSymmetryMatchData" >
              <base type="Handle" >
               <serial_number type="int" >175</serial_number>
              </base>
              <transformation type="Handle" >
               <serial_number type="int" >348</serial_number>
              </transformation>
              <site_order type="int" >1</site_order>
             </second>
            </item>
            <item type="Pair" >
             <first type="Handle" >
              <serial_number type="int" >181</serial_number>
             </first>
             <second type="CrystalSymmetryMatchData" >
              <base type="Handle" >
               <serial_number type="int" >181</serial_number>
              </base>
              <transformation type="Handle" >
               <serial_number type="int" >348</serial_number>
              </transformation>
              <site_order type="int" >1</site_order>
             </second>
            </item>
            <item type="Pair" >
             <first type="Handle" >
              <serial_number type="int" >187</serial_number>
             </first>
             <second type="CrystalSymmetryMatchData" >
              <base type="Handle" >
               <serial_number type="int" >187</serial_number>
              </base>
              <transformation type="Handle" >
               <serial_number type="int" >348</serial_number>
              </transformation>
              <site_order type="int" >1</site_order>
             </second>
            </item>
            <item type="Pair" >
             <first type="Handle" >
              <serial_number type="int" >193</serial_number>
             </first>
             <second type="CrystalSymmetryMatchData" >
              <base type="Handle" >
               <serial_number type="int" >193</serial_number>
              </base>
              <transformation type="Handle" >
               <serial_number type="int" >348</serial_number>
              </transformation>
              <site_order type="int" >1</site_order>
             </second>
            </item>
            <item type="Pair" >
             <first type="Handle" >
              <serial_number type="int" >199</serial_number>
             </first>
             <second type="CrystalSymmetryMatchData" >
              <base type="Handle" >
               <serial_number type="int" >199</serial_number>
              </base>
              <transformation type="Handle" >
               <serial_number type="int" >348</serial_number>
              </transformation>
              <site_order type="int" >1</site_order>
             </second>
            </item>
            <item type="Pair" >
             <first type="Handle" >
              <serial_number type="int" >205</serial_number>
             </first>
             <second type="CrystalSymmetryMatchData" >
              <base type="Handle" >
               <serial_number type="int" >205</serial_number>
              </base>
              <transformation type="Handle" >
               <serial_number type="int" >348</serial_number>
              </transformation>
              <site_order type="int" >1</site_order>
             </second>
            </item>
            <item type="Pair" >
             <first type="Handle" >
              <serial_number type="int" >211</serial_number>
             </first>
             <second type="CrystalSymmetryMatchData" >
              <base type="Handle" >
               <serial_number type="int" >211</serial_number>
              </base>
              <transformation type="Handle" >
               <serial_number type="int" >348</serial_number>
              </transformation>
              <site_order type="int" >1</site_order>
             </second>
            </item>
            <item type="Pair" >
             <first type="Handle" >
              <serial_number type="int" >217</serial_number>
             </first>
             <second type="CrystalSymmetryMatchData" >
              <base type="Handle" >
               <serial_number type="int" >217</serial_number>
              </base>
              <transformation type="Handle" >
               <serial_number type="int" >348</serial_number>
              </transformation>
              <site_order type="int" >1</site_order>
             </second>
            </item>
            <item type="Pair" >
             <first type="Handle" >
              <serial_number type="int" >223</serial_number>
             </first>
             <second type="CrystalSymmetryMatchData" >
              <base type="Handle" >
               <serial_number type="int" >223</serial_number>
              </base>
              <transformation type="Handle" >
               <serial_number type="int" >348</serial_number>
              </transformation>
              <site_order type="int" >1</site_order>
             </second>
            </item>
            <item type="Pair" >
             <first type="Handle" >
              <serial_number type="int" >229</serial_number>
             </first>
             <second type="CrystalSymmetryMatchData" >
              <base type="Handle" >
               <serial_number type="int" >229</serial_number>
              </base>
              <transformation type="Handle" >
               <serial_number type="int" >348</serial_number>
              </transformation>
              <site_order type="int" >1</site_order>
             </second>
            </item>
            <item type="Pair" >
             <first type="Handle" >
              <serial_number type="int" >235</serial_number>
             </first>
             <second type="CrystalSymmetryMatchData" >
              <base type="Handle" >
               <serial_number type="int" >235</serial_number>
              </base>
              <transformation type="Handle" >
               <serial_number type="int" >348</serial_number>
              </transformation>
              <site_order type="int" >1</site_order>
             </second>
            </item>
            <item type="Pair" >
             <first type="Handle" >
              <serial_number type="int" >241</serial_number>
             </first>
             <second type="CrystalSymmetryMatchData" >
              <base type="Handle" >
               <serial_number type="int" >241</serial_number>
              </base>
              <transformation type="Handle" >
               <serial_number type="int" >348</serial_number>
              </transformation>
              <site_order type="int" >1</site_order>
             </second>
            </item>
            <item type="Pair" >
             <first type="Handle" >
              <serial_number type="int" >247</serial_number>
             </first>
             <second type="CrystalSymmetryMatchData" >
              <base type="Handle" >
               <serial_number type="int" >247</serial_number>
              </base>
              <transformation type="Handle" >
               <serial_number type="int" >348</serial_number>
              </transformation>
              <site_order type="int" >1</site_order>
             </second>
            </item>
            <item type="Pair" >
             <first type="Handle" >
              <serial_number type="int" >253</serial_number>
             </first>
             <second type="CrystalSymmetryMatchData" >
              <base type="Handle" >
               <serial_number type="int" >253</serial_number>
              </base>
              <transformation type="Handle" >
               <serial_number type="int" >348</serial_number>
              </transformation>
              <site_order type="int" >1</site_order>
             </second>
            </item>
            <item type="Pair" >
             <first type="Handle" >
              <serial_number type="int" >259</serial_number>
             </first>
             <second type="CrystalSymmetryMatchData" >
              <base type="Handle" >
               <serial_number type="int" >259</serial_number>
              </base>
              <transformation type="Handle" >
               <serial_number type="int" >348</serial_number>
              </transformation>
              <site_order type="int" >1</site_order>
             </second>
            </item>
            <item type="Pair" >
             <first type="Handle" >
              <serial_number type="int" >265</serial_number>
             </first>
             <second type="CrystalSymmetryMatchData" >
              <base type="Handle" >
               <serial_number type="int" >265</serial_number>
              </base>
              <transformation type="Handle" >
               <serial_number type="int" >348</serial_number>
              </transformation>
              <site_order type="int" >1</site_order>
             </second>
            </item>
            <item type="Pair" >
             <first type="Handle" >
              <serial_number type="int" >271</serial_number>
             </first>
             <second type="CrystalSymmetryMatchData" >
              <base type="Handle" >
               <serial_number type="int" >271</serial_number>
              </base>
              <transformation type="Handle" >
               <serial_number type="int" >348</serial_number>
              </transformation>
              <site_order type="int" >1</site_order>
             </second>
            </item>
            <item type="Pair" >
             <first type="Handle" >
              <serial_number type="int" >277</serial_number>
             </first>
             <second type="CrystalSymmetryMatchData" >
              <base type="Handle" >
               <serial_number type="int" >277</serial_number>
              </base>
              <transformation type="Handle" >
               <serial_number type="int" >348</serial_number>
              </transformation>
              <site_order type="int" >1</site_order>
             </second>
            </item>
            <item type="Pair" >
             <first type="Handle" >
              <serial_number type="int" >283</serial_number>
             </first>
             <second type="CrystalSymmetryMatchData" >
              <base type="Handle" >
               <serial_number type="int" >283</serial_number>
              </base>
              <transformation type="Handle" >
               <serial_number type="int" >348</serial_number>
              </transformation>
              <site_order type="int" >1</site_order>
             </second>
            </item>
            <item type="Pair" >
             <first type="Handle" >
              <serial_number type="int" >289</serial_number>
             </first>
             <second type="CrystalSymmetryMatchData" >
              <base type="Handle" >
               <serial_number type="int" >289</serial_number>
              </base>
              <transformation type="Handle" >
               <serial_number type="int" >348</serial_number>
              </transformation>
              <site_order type="int" >1</site_order>
             </second>
            </item>
           </crystal_symmetry_match_data>
          </value>
         </crystal_symmetry_match>
        </value>
       </crystal_structure>
       <crystal_snapshot type="Handle" >
        <serial_number type="int" >349</serial_number>
        <value type="Container" >
         <count type="int" >10</count>
         <item type="Handle" >
          <serial_number type="int" >350</serial_number>
          <value type="MoleculeSubset" >
           <parent_molecule type="Handle" >
            <serial_number type="int" >6</serial_number>
           </parent_molecule>
           <atoms type="Container" >
            <count type="int" >48</count>
            <item type="Handle" >
             <serial_number type="int" >351</serial_number>
             <value type="CrystalStructureViewAtom" >
              <value type="ProxyAtom" >
               <parent_atom type="Handle" >
                <serial_number type="int" >7</serial_number>
               </parent_atom>
              </value>
              <site type="Handle" >
               <serial_number type="int" >352</serial_number>
               <value type="Site" >
                <orthogonal type="Point" >
                 <coordinates type="Vector" >
                  <vector type="Container" >
                   <count type="int" >3</count>
                   <item type="float" >-1.5459701377491097</item>
                   <item type="float" >6.6486803959999996</item>
                   <item type="float" >4.2826738673277136</item>
                  </vector>
                 </coordinates>
                </orthogonal>
                <fractional type="Point" >
                 <coordinates type="Vector" >
                  <vector type="Container" >
                   <count type="int" >3</count>
                   <item type="float" >-0.12486999999999999</item>
                   <item type="float" >0.91203999999999996</item>
                   <item type="float" >0.17163999999999999</item>
                  </vector>
                 </coordinates>
                </fractional>
                <uncertain_value type="UncertainValue" >
                 <value type="float" >1</value>
                 <uncertainty type="Uncertainty" >
                  <precision type="int" >0</precision>
                  <uncertainty type="int" >0</uncertainty>
                 </uncertainty>
                </uncertain_value>
                <uncertainty type="Handle" >
                 <serial_number type="int" >353</serial_number>
                 <value type="Container" >
                  <count type="int" >3</count>
                  <item type="Uncertainty" >
                   <precision type="int" >5</precision>
                   <uncertainty type="int" >8</uncertainty>
                  </item>
                  <item type="Uncertainty" >
                   <precision type="int" >5</precision>
                   <uncertainty type="int" >11</uncertainty>
                  </item>
                  <item type="Uncertainty" >
                   <precision type="int" >5</precision>
                   <uncertainty type="int" >3</uncertainty>
                  </item>
                 </value>
                </uncertainty>
                <adps type="Handle" >
                 <serial_number type="int" >354</serial_number>
                 <value type="AtomicDisplacementParameters" >
                  <uvalues type="Container" >
                   <count type="int" >6</count>
                   <item type="UncertainValue" >
                    <value type="float" >0.021499999999999998</value>
                    <uncertainty type="Uncertainty" >
                     <precision type="int" >4</precision>
                     <uncertainty type="int" >4</uncertainty>
                    </uncertainty>
                   </item>
                   <item type="UncertainValue" >
                    <value type="float" >0.024899999999999999</value>
                    <uncertainty type="Uncertainty" >
                     <precision type="int" >4</precision>
                     <uncertainty type="int" >4</uncertainty>
                    </uncertainty>
                   </item>
                   <item type="UncertainValue" >
                    <value type="float" >0.011599999999999999</value>
                    <uncertainty type="Uncertainty" >
                     <precision type="int" >4</precision>
                     <uncertainty type="int" >3</uncertainty>
                    </uncertainty>
                   </item>
                   <item type="UncertainValue" >
                    <value type="float" >0.0027000000000000001</value>
                    <uncertainty type="Uncertainty" >
                     <precision type="int" >4</precision>
                     <uncertainty type="int" >3</uncertainty>
                    </uncertainty>
                   </item>
                   <item type="UncertainValue" >
                    <value type="float" >0.0014</value>
                    <uncertainty type="Uncertainty" >
                     <precision type="int" >4</precision>
                     <uncertainty type="int" >3</uncertainty>
                    </uncertainty>
                   </item>
                   <item type="UncertainValue" >
                    <value type="float" >0.00050000000000000001</value>
                    <uncertainty type="Uncertainty" >
                     <precision type="int" >4</precision>
                     <uncertainty type="int" >3</uncertainty>
                    </uncertainty>
                   </item>
                  </uvalues>
                  <type type="AtomicDisplacementParameters::Type" >
                   <enumerator type="int" >0</enumerator>
                  </type>
                  <u_equivalent type="float" >0.019324228760767261</u_equivalent>
                 </value>
                </adps>
               </value>
              </site>
             </value>
            </item>
            <item type="Handle" >
             <serial_number type="int" >355</serial_number>
             <value type="CrystalStructureViewAtom" >
              <value type="ProxyAtom" >
               <parent_atom type="Handle" >
                <serial_number type="int" >13</serial_number>
               </parent_atom>
              </value>
              <site type="Handle" >
               <serial_number type="int" >356</serial_number>
               <value type="Site" >
                <orthogonal type="Point" >
                 <coordinates type="Vector" >
                  <vector type="Container" >
                   <count type="int" >3</count>
                   <item type="float" >-0.45308617746786456</item>
                   <item type="float" >5.7127301350000002</item>
                   <item type="float" >-0.121763274717777</item>
                  </vector>
                 </coordinates>
                </orthogonal>
                <fractional type="Point" >
                 <coordinates type="Vector" >
                  <vector type="Container" >
                   <count type="int" >3</count>
                   <item type="float" >-0.046879999999999998</item>
                   <item type="float" >0.78364999999999996</item>
                   <item type="float" >-0.0048799999999999998</item>
                  </vector>
                 </coordinates>
                </fractional>
                <uncertain_value type="UncertainValue" >
                 <value type="float" >1</value>
                 <uncertainty type="Uncertainty" >
                  <precision type="int" >0</precision>
                  <uncertainty type="int" >0</uncertainty>
                 </uncertainty>
                </uncertain_value>
                <uncertainty type="Handle" >
                 <serial_number type="int" >357</serial_number>
                 <value type="Container" >
                  <count type="int" >3</count>
                  <item type="Uncertainty" >
                   <precision type="int" >5</precision>
                   <uncertainty type="int" >7</uncertainty>
                  </item>
                  <item type="Uncertainty" >
                   <precision type="int" >5</precision>
                   <uncertainty type="int" >10</uncertainty>
                  </item>
                  <item type="Uncertainty" >
                   <precision type="int" >5</precision>
                   <uncertainty type="int" >3</uncertainty>
                  </item>
                 </value>
                </uncertainty>
                <adps type="Handle" >
                 <serial_number type="int" >358</serial_number>
                 <value type="AtomicDisplacementParameters" >
                  <uvalues type="Container" >
                   <count type="int" >6</count>
                   <item type="UncertainValue" >
                    <value type="float" >0.020199999999999999</value>
                    <uncertainty type="Uncertainty" >
                     <precision type="int" >4</precision>
                     <uncertainty type="int" >4</uncertainty>
                    </uncertainty>
                   </item>
                   <item type="UncertainValue" >
                    <value type="float" >0.0229</value>
                    <uncertainty type="Uncertainty" >
                     <precision type="int" >4</precision>
                     <uncertainty type="int" >4</uncertainty>
                    </uncertainty>
                   </item>
                   <item type="UncertainValue" >
                    <value type="float" >0.014800000000000001</value>
                    <uncertainty type="Uncertainty" >
                     <precision type="int" >4</precision>
                     <uncertainty type="int" >3</uncertainty>
                    </uncertainty>
                   </item>
                   <item type="UncertainValue" >
                    <value type="float" >0.0014</value>
                    <uncertainty type="Uncertainty" >
                     <precision type="int" >4</precision>
                     <uncertainty type="int" >3</uncertainty>
                    </uncertainty>
                   </item>
                   <item type="UncertainValue" >
                    <value type="float" >0.0044999999999999997</value>
                    <uncertainty type="Uncertainty" >
                     <precision type="int" >4</precision>
                     <uncertainty type="int" >3</uncertainty>
                    </uncertainty>
                   </item>
                   <item type="UncertainValue" >
                    <value type="float" >-0.0043</value>
                    <uncertainty type="Uncertainty" >
                     <precision type="int" >4</precision>
                     <uncertainty type="int" >3</uncertainty>
                    </uncertainty>
                   </item>
                  </uvalues>
                  <type type="AtomicDisplacementParameters::Type" >
                   <enumerator type="int" >0</enumerator>
                  </type>
                  <u_equivalent type="float" >0.019141786415468671</u_equivalent>
                 </value>
                </adps>
               </value>
              </site>
             </value>
            </item>
            <item type="Handle" >
             <serial_number type="int" >359</serial_number>
             <value type="CrystalStructureViewAtom" >
              <value type="ProxyAtom" >
               <parent_atom type="Handle" >
                <serial_number type="int" >19</serial_number>
               </parent_atom>
              </value>
              <site type="Handle" >
               <serial_number type="int" >360</serial_number>
               <value type="Site" >
                <orthogonal type="Point" >
                 <coordinates type="Vector" >
                  <vector type="Container" >
                   <count type="int" >3</count>
                   <item type="float" >-1.5720940362286195</item>
                   <item type="float" >6.6147094619999995</item>
                   <item type="float" >3.0054070573270986</item>
                  </vector>
                 </coordinates>
                </orthogonal>
                <fractional type="Point" >
                 <coordinates type="Vector" >
                  <vector type="Container" >
                   <count type="int" >3</count>
                   <item type="float" >-0.13705999999999999</item>
                   <item type="float" >0.90737999999999996</item>
                   <item type="float" >0.12045</item>
                  </vector>
                 </coordinates>
                </fractional>
                <uncertain_value type="UncertainValue" >
                 <value type="float" >1</value>
                 <uncertainty type="Uncertainty" >
                  <precision type="int" >0</precision>
                  <uncertainty type="int" >0</uncertainty>
                 </uncertainty>
                </uncertain_value>
                <uncertainty type="Handle" >
                 <serial_number type="int" >361</serial_number>
                 <value type="Container" >
                  <count type="int" >3</count>
                  <item type="Uncertainty" >
                   <precision type="int" >5</precision>
                   <uncertainty type="int" >8</uncertainty>
                  </item>
                  <item type="Uncertainty" >
                   <precision type="int" >5</precision>
                   <uncertainty type="int" >11</uncertainty>
                  </item>
                  <item type="Uncertainty" >
                   <precision type="int" >5</precision>
                   <uncertainty type="int" >3</uncertainty>
                  </item>
                 </value>
                </uncertainty>
                <adps type="Handle" >
                 <serial_number type="int" >362</serial_number>
                 <value type="AtomicDisplacementParameters" >
                  <uvalues type="Container" >
                   <count type="int" >6</count>
                   <item type="UncertainValue" >
                    <value type="float" >0.014500000000000001</value>
                    <uncertainty type="Uncertainty" >
                     <precision type="int" >4</precision>
                     <uncertainty type="int" >4</uncertainty>
                    </uncertainty>
                   </item>
                   <item type="UncertainValue" >
                    <value type="float" >0.016799999999999999</value>
                    <uncertainty type="Uncertainty" >
                     <precision type="int" >4</precision>
                     <uncertainty type="int" >4</uncertainty>
                    </uncertainty>
                   </item>
                   <item type="UncertainValue" >
                    <value type="float" >0.0137</value>
                    <uncertainty type="Uncertainty" >
                     <precision type="int" >4</precision>
                     <uncertainty type="int" >4</uncertainty>
                    </uncertainty>
                   </item>
                   <item type="UncertainValue" >
                    <value type="float" >0.00080000000000000004</value>
                    <uncertainty type="Uncertainty" >
                     <precision type="int" >4</precision>
                     <uncertainty type="int" >3</uncertainty>
                    </uncertainty>
                   </item>
                   <item type="UncertainValue" >
                    <value type="float" >0.00050000000000000001</value>
                    <uncertainty type="Uncertainty" >
                     <precision type="int" >4</precision>
                     <uncertainty type="int" >3</uncertainty>
                    </uncertainty>
                   </item>
                   <item type="UncertainValue" >
                    <value type="float" >0.00040000000000000002</value>
                    <uncertainty type="Uncertainty" >
                     <precision type="int" >4</precision>
                     <uncertainty type="int" >3</uncertainty>
                    </uncertainty>
                   </item>
                  </uvalues>
                  <type type="AtomicDisplacementParameters::Type" >
                   <enumerator type="int" >0</enumerator>
                  </type>
                  <u_equivalent type="float" >0.01502633113811481</u_equivalent>
                 </value>
                </adps>
               </value>
              </site>
             </value>
            </item>
            <item type="Handle" >
             <serial_number type="int" >363</serial_number>
             <value type="CrystalStructureViewAtom" >
              <value type="ProxyAtom" >
               <parent_atom type="Handle" >
                <serial_number type="int" >25</serial_number>
               </parent_atom>
              </value>
              <site type="Handle" >
               <serial_number type="int" >364</serial_number>
               <value type="Site" >
                <orthogonal type="Point" >
                 <coordinates type="Vector" >
                  <vector type="Container" >
                   <count type="int" >3</count>
                   <item type="float" >-1.0727673152319517</item>
                   <item type="float" >6.1255571720000006</item>
                   <item type="float" >0.91771582871308166</item>
                  </vector>
                 </coordinates>
                </orthogonal>
                <fractional type="Point" >
                 <coordinates type="Vector" >
                  <vector type="Container" >
                   <count type="int" >3</count>
                   <item type="float" >-0.10199</item>
                   <item type="float" >0.84028000000000003</item>
                   <item type="float" >0.03678</item>
                  </vector>
                 </coordinates>
                </fractional>
                <uncertain_value type="UncertainValue" >
                 <value type="float" >1</value>
                 <uncertainty type="Uncertainty" >
                  <precision type="int" >0</precision>
                  <uncertainty type="int" >0</uncertainty>
                 </uncertainty>
                </uncertain_value>
                <uncertainty type="Handle" >
                 <serial_number type="int" >365</serial_number>
                 <value type="Container" >
                  <count type="int" >3</count>
                  <item type="Uncertainty" >
                   <precision type="int" >5</precision>
                   <uncertainty type="int" >8</uncertainty>
                  </item>
                  <item type="Uncertainty" >
                   <precision type="int" >5</precision>
                   <uncertainty type="int" >12</uncertainty>
                  </item>
                  <item type="Uncertainty" >
                   <precision type="int" >5</precision>
                   <uncertainty type="int" >3</uncertainty>
                  </item>
                 </value>
                </uncertainty>
                <adps type="Handle" >
                 <serial_number type="int" >366</serial_number>
                 <value type="AtomicDisplacementParameters" >
                  <uvalues type="Container" >
                   <count type="int" >6</count>
                   <item type="UncertainValue" >
                    <value type="float" >0.0144</value>
                    <uncertainty type="Uncertainty" >
                     <precision type="int" >4</precision>
                     <uncertainty type="int" >4</uncertainty>
                    </uncertainty>
                   </item>
                   <item type="UncertainValue" >
                    <value type="float" >0.016500000000000001</value>
                    <uncertainty type="Uncertainty" >
                     <precision type="int" >4</precision>
                     <uncertainty type="int" >4</uncertainty>
                    </uncertainty>
                   </item>
                   <item type="UncertainValue" >
                    <value type="float" >0.0144</value>
                    <uncertainty type="Uncertainty" >
                     <precision type="int" >4</precision>
                     <uncertainty type="int" >4</uncertainty>
                    </uncertainty>
                   </item>
                   <item type="UncertainValue" >
                    <value type="float" >0.0001</value>
                    <uncertainty type="Uncertainty" >
                     <precision type="int" >4</precision>
                     <uncertainty type="int" >3</uncertainty>
                    </uncertainty>
                   </item>
                   <item type="UncertainValue" >
                    <value type="float" >0.0015</value>
                    <uncertainty type="Uncertainty" >
                     <precision type="int" >4</precision>
                     <uncertainty type="int" >3</uncertainty>
                    </uncertainty>
                   </item>
                   <item type="UncertainValue" >
                    <value type="float" >-0.0011000000000000001</value>
                    <uncertainty type="Uncertainty" >
                     <precision type="int" >4</precision>
                     <uncertainty type="int" >3</uncertainty>
                    </uncertainty>
                   </item>
                  </uvalues>
                  <type type="AtomicDisplacementParameters::Type" >
                   <enumerator type="int" >0</enumerator>
                  </type>
                  <u_equivalent type="float" >0.015078208151190381</u_equivalent>
                 </value>
                </adps>
               </value>
              </site>
             </value>
            </item>
            <item type="Handle" >
             <serial_number type="int" >367</serial_number>
             <value type="CrystalStructureViewAtom" >
              <value type="ProxyAtom" >
               <parent_atom type="Handle" >
                <serial_number type="int" >31</serial_number>
               </parent_atom>
              </value>
              <site type="Handle" >
               <serial_number type="int" >368</serial_number>
               <value type="Site" >
                <orthogonal type="Point" >
                 <coordinates type="Vector" >
                  <vector type="Container" >
                   <count type="int" >3</count>
                   <item type="float" >-0.62363062168551453</item>
                   <item type="float" >6.0901282580000009</item>
                   <item type="float" >2.1937350641776545</item>
                  </vector>
                 </coordinates>
                </orthogonal>
                <fractional type="Point" >
                 <coordinates type="Vector" >
                  <vector type="Container" >
                   <count type="int" >3</count>
                   <item type="float" >-0.046890000000000001</item>
                   <item type="float" >0.83542000000000005</item>
                   <item type="float" >0.087919999999999998</item>
                  </vector>
                 </coordinates>
                </fractional>
                <uncertain_value type="UncertainValue" >
                 <value type="float" >1</value>
                 <uncertainty type="Uncertainty" >
                  <precision type="int" >0</precision>
                  <uncertainty type="int" >0</uncertainty>
                 </uncertainty>
                </uncertain_value>
                <uncertainty type="Handle" >
                 <serial_number type="int" >369</serial_number>
                 <value type="Container" >
                  <count type="int" >3</count>
                  <item type="Uncertainty" >
                   <precision type="int" >5</precision>
                   <uncertainty type="int" >10</uncertainty>
                  </item>
                  <item type="Uncertainty" >
                   <precision type="int" >5</precision>
                   <uncertainty type="int" >13</uncertainty>
                  </item>
                  <item type="Uncertainty" >
                   <precision type="int" >5</precision>
                   <uncertainty type="int" >4</uncertainty>
                  </item>
                 </value>
                </uncertainty>
                <adps type="Handle" >
                 <serial_number type="int" >370</serial_number>
                 <value type="AtomicDisplacementParameters" >
                  <uvalues type="Container" >
                   <count type="int" >6</count>
                   <item type="UncertainValue" >
                    <value type="float" >0.015100000000000001</value>
                    <uncertainty type="Uncertainty" >
                     <precision type="int" >4</precision>
                     <uncertainty type="int" >4</uncertainty>
                    </uncertainty>
                   </item>
                   <item type="UncertainValue" >
                    <value type="float" >0.014500000000000001</value>
                    <uncertainty type="Uncertainty" >
                     <precision type="int" >4</precision>
                     <uncertainty type="int" >4</uncertainty>
                    </uncertainty>
                   </item>
                   <item type="UncertainValue" >
                    <value type="float" >0.014500000000000001</value>
                    <uncertainty type="Uncertainty" >
                     <precision type="int" >4</precision>
                     <uncertainty type="int" >4</uncertainty>
                    </uncertainty>
                   </item>
                   <item type="UncertainValue" >
                    <value type="float" >-0.00020000000000000001</value>
                    <uncertainty type="Uncertainty" >
                     <precision type="int" >4</precision>
                     <uncertainty type="int" >3</uncertainty>
                    </uncertainty>
                   </item>
                   <item type="UncertainValue" >
                    <value type="float" >0.001</value>
                    <uncertainty type="Uncertainty" >
                     <precision type="int" >4</precision>
                     <uncertainty type="int" >3</uncertainty>
                    </uncertainty>
                   </item>
                   <item type="UncertainValue" >
                    <value type="float" >-0.00020000000000000001</value>
                    <uncertainty type="Uncertainty" >
                     <precision type="int" >4</precision>
                     <uncertainty type="int" >3</uncertainty>
                    </uncertainty>
                   </item>
                  </uvalues>
                  <type type="AtomicDisplacementParameters::Type" >
                   <enumerator type="int" >0</enumerator>
                  </type>
                  <u_equivalent type="float" >0.01470425645091549</u_equivalent>
                 </value>
                </adps>
               </value>
              </site>
             </value>
            </item>
            <item type="Handle" >
             <serial_number type="int" >371</serial_number>
             <value type="CrystalStructureViewAtom" >
              <value type="ProxyAtom" >
               <parent_atom type="Handle" >
                <serial_number type="int" >37</serial_number>
               </parent_atom>
              </value>
              <site type="Handle" >
               <serial_number type="int" >372</serial_number>
               <value type="Site" >
                <orthogonal type="Point" >
                 <coordinates type="Vector" >
                  <vector type="Container" >
                   <count type="int" >3</count>
                   <item type="float" >-2.6513784635288027</item>
                   <item type="float" >7.2978459910000009</item>
                   <item type="float" >2.2094545033317941</item>
                  </vector>
                 </coordinates>
                </orthogonal>
                <fractional type="Point" >
                 <coordinates type="Vector" >
                  <vector type="Container" >
                   <count type="int" >3</count>
                   <item type="float" >-0.25251000000000001</item>
                   <item type="float" >1.00109</item>
                   <item type="float" >0.088550000000000004</item>
                  </vector>
                 </coordinates>
                </fractional>
                <uncertain_value type="UncertainValue" >
                 <value type="float" >1</value>
                 <uncertainty type="Uncertainty" >
                  <precision type="int" >0</precision>
                  <uncertainty type="int" >0</uncertainty>
                 </uncertainty>
                </uncertain_value>
                <uncertainty type="Handle" >
                 <serial_number type="int" >373</serial_number>
                 <value type="Container" >
                  <count type="int" >3</count>
                  <item type="Uncertainty" >
                   <precision type="int" >5</precision>
                   <uncertainty type="int" >10</uncertainty>
                  </item>
                  <item type="Uncertainty" >
                   <precision type="int" >5</precision>
                   <uncertainty type="int" >13</uncertainty>
                  </item>
                  <item type="Uncertainty" >
                   <precision type="int" >5</precision>
                   <uncertainty type="int" >4</uncertainty>
                  </item>
                 </value>
                </uncertainty>
                <adps type="Handle" >
                 <serial_number type="int" >374</serial_number>
                 <value type="AtomicDisplacementParameters" >
                  <uvalues type="Container" >
                   <count type="int" >6</count>
                   <item type="UncertainValue" >
                    <value type="float" >0.014500000000000001</value>
                    <uncertainty type="Uncertainty" >
                     <precision type="int" >4</precision>
                     <uncertainty type="int" >4</uncertainty>
                    </uncertainty>
                   </item>
                   <item type="UncertainValue" >
                    <value type="float" >0.016400000000000001</value>
                    <uncertainty type="Uncertainty" >
                     <precision type="int" >4</precision>
                     <uncertainty type="int" >4</uncertainty>
                    </uncertainty>
                   </item>
                   <item type="UncertainValue" >
                    <value type="float" >0.0138</value>
                    <uncertainty type="Uncertainty" >
                     <precision type="int" >4</precision>
                     <uncertainty type="int" >4</uncertainty>
                    </uncertainty>
                   </item>
                   <item type="UncertainValue" >
                    <value type="float" >0.0019</value>
                    <uncertainty type="Uncertainty" >
                     <precision type="int" >4</precision>
                     <uncertainty type="int" >3</uncertainty>
                    </uncertainty>
                   </item>
                   <item type="UncertainValue" >
                    <value type="float" >0.00080000000000000004</value>
                    <uncertainty type="Uncertainty" >
                     <precision type="int" >4</precision>
                     <uncertainty type="int" >3</uncertainty>
                    </uncertainty>
                   </item>
                   <item type="UncertainValue" >
                    <value type="float" >0.00080000000000000004</value>
                    <uncertainty type="Uncertainty" >
                     <precision type="int" >4</precision>
                     <uncertainty type="int" >3</uncertainty>
                    </uncertainty>
                   </item>
                  </uvalues>
                  <type type="AtomicDisplacementParameters::Type" >
[truncated: 2,282,497 more chars]
