# Supplementary material for: Radicals organized by disk shaped aromatics – polymorphism and co-crystals that tune inter-electron exchange
Source: Royal Society of Chemistry journal article supplement (doi:10.1039/c1ce06096a), 2011-12-17
Supplement: c1ce06096a_4.mryx [file c1ce06096a_4.mryx › c1ce06096a_4.mryx.out]

<!DOCTYPE CCDC_XML>
<All>
 <graphics_crystal type="Container" >
  <count type="int" >1</count>
  <item type="Handle" >
   <serial_number type="int" >1</serial_number>
   <value type="GraphicsCrystal" >
    <graphics_crystal_memento type="GraphicsCrystalMemento" >
     <graphics_object type="GraphicsObject" >
      <color type="RGBA" >
       <red type="float" >1</red>
       <green type="float" >1</green>
       <blue type="float" >1</blue>
       <alpha type="float" >1</alpha>
      </color>
      <style type="GraphicsObject::RenderingStyle" >
       <enumerator type="int" >1</enumerator>
      </style>
      <label type="string" >phl004a_0m</label>
      <options type="int" >851971</options>
     </graphics_object>
     <crystal type="Handle" >
      <serial_number type="int" >2</serial_number>
      <value type="CrystalStructureViewMemento" >
       <crystal_structure type="Handle" >
        <serial_number type="int" >3</serial_number>
        <value type="ConcreteCrystalStructure" >
         <cell type="Handle" >
          <serial_number type="int" >4</serial_number>
          <value type="Cell" >
           <a type="UncertainValue" >
            <value type="float" >10.321999999999999</value>
            <uncertainty type="Uncertainty" >
             <precision type="int" >3</precision>
             <uncertainty type="int" >5</uncertainty>
            </uncertainty>
           </a>
           <b type="UncertainValue" >
            <value type="float" >7.181</value>
            <uncertainty type="Uncertainty" >
             <precision type="int" >3</precision>
             <uncertainty type="int" >3</uncertainty>
            </uncertainty>
           </b>
           <c type="UncertainValue" >
            <value type="float" >24.036999999999999</value>
            <uncertainty type="Uncertainty" >
             <precision type="int" >3</precision>
             <uncertainty type="int" >11</uncertainty>
            </uncertainty>
           </c>
           <alpha type="UncertainValue" >
            <value type="float" >1.5707963267948966</value>
            <uncertainty type="Uncertainty" >
             <precision type="int" >2</precision>
             <uncertainty type="int" >0</uncertainty>
            </uncertainty>
           </alpha>
           <beta type="UncertainValue" >
            <value type="float" >1.7107368262198019</value>
            <uncertainty type="Uncertainty" >
             <precision type="int" >3</precision>
             <uncertainty type="int" >6</uncertainty>
            </uncertainty>
           </beta>
           <gamma type="UncertainValue" >
            <value type="float" >1.5707963267948966</value>
            <uncertainty type="Uncertainty" >
             <precision type="int" >2</precision>
             <uncertainty type="int" >0</uncertainty>
            </uncertainty>
           </gamma>
           <spacegroup type="Spacegroup" >
            <number type="int" >14</number>
            <name type="string" >P21/n</name>
            <setting type="int" >6</setting>
            <system type="Spacegroup::System" >
             <enumerator type="int" >0</enumerator>
            </system>
            <crystal_symmetry_operators type="Handle" >
             <serial_number type="int" >5</serial_number>
             <value type="Container" >
              <count type="int" >4</count>
              <item type="CrystalSymmetryOperator" >
               <rotation type="Matrix" >
                <matrix type="Vector" >
                 <vector type="Container" >
                  <count type="int" >9</count>
                  <item type="int" >1</item>
                  <item type="int" >0</item>
                  <item type="int" >0</item>
                  <item type="int" >0</item>
                  <item type="int" >1</item>
                  <item type="int" >0</item>
                  <item type="int" >0</item>
                  <item type="int" >0</item>
                  <item type="int" >1</item>
                 </vector>
                </matrix>
               </rotation>
               <translation type="Vector" >
                <vector type="Container" >
                 <count type="int" >3</count>
                 <item type="float" >0</item>
                 <item type="float" >0</item>
                 <item type="float" >0</item>
                </vector>
               </translation>
              </item>
              <item type="CrystalSymmetryOperator" >
               <rotation type="Matrix" >
                <matrix type="Vector" >
                 <vector type="Container" >
                  <count type="int" >9</count>
                  <item type="int" >-1</item>
                  <item type="int" >0</item>
                  <item type="int" >0</item>
                  <item type="int" >0</item>
                  <item type="int" >1</item>
                  <item type="int" >0</item>
                  <item type="int" >0</item>
                  <item type="int" >0</item>
                  <item type="int" >-1</item>
                 </vector>
                </matrix>
               </rotation>
               <translation type="Vector" >
                <vector type="Container" >
                 <count type="int" >3</count>
                 <item type="float" >0.5</item>
                 <item type="float" >0.5</item>
                 <item type="float" >0.5</item>
                </vector>
               </translation>
              </item>
              <item type="CrystalSymmetryOperator" >
               <rotation type="Matrix" >
                <matrix type="Vector" >
                 <vector type="Container" >
                  <count type="int" >9</count>
                  <item type="int" >-1</item>
                  <item type="int" >0</item>
                  <item type="int" >0</item>
                  <item type="int" >0</item>
                  <item type="int" >-1</item>
                  <item type="int" >0</item>
                  <item type="int" >0</item>
                  <item type="int" >0</item>
                  <item type="int" >-1</item>
                 </vector>
                </matrix>
               </rotation>
               <translation type="Vector" >
                <vector type="Container" >
                 <count type="int" >3</count>
                 <item type="float" >0</item>
                 <item type="float" >0</item>
                 <item type="float" >0</item>
                </vector>
               </translation>
              </item>
              <item type="CrystalSymmetryOperator" >
               <rotation type="Matrix" >
                <matrix type="Vector" >
                 <vector type="Container" >
                  <count type="int" >9</count>
                  <item type="int" >1</item>
                  <item type="int" >0</item>
                  <item type="int" >0</item>
                  <item type="int" >0</item>
                  <item type="int" >-1</item>
                  <item type="int" >0</item>
                  <item type="int" >0</item>
                  <item type="int" >0</item>
                  <item type="int" >1</item>
                 </vector>
                </matrix>
               </rotation>
               <translation type="Vector" >
                <vector type="Container" >
                 <count type="int" >3</count>
                 <item type="float" >0.5</item>
                 <item type="float" >0.5</item>
                 <item type="float" >0.5</item>
                </vector>
               </translation>
              </item>
             </value>
            </crystal_symmetry_operators>
           </spacegroup>
           <frac_to_orth type="Matrix" >
            <matrix type="Vector" >
             <vector type="Container" >
              <count type="int" >9</count>
              <item type="float" >10.321999999999999</item>
              <item type="float" >4.3970943323385719e-16</item>
              <item type="float" >-3.3527816186754755</item>
              <item type="float" >0</item>
              <item type="float" >7.181</item>
              <item type="float" >1.6771404194327966e-15</item>
              <item type="float" >0</item>
              <item type="float" >0</item>
              <item type="float" >23.802021435530886</item>
             </vector>
            </matrix>
           </frac_to_orth>
           <orth_to_frac type="Matrix" >
            <matrix type="Vector" >
             <vector type="Container" >
              <count type="int" >9</count>
              <item type="float" >0.096880449525285794</item>
              <item type="float" >-5.9322166205548987e-18</item>
              <item type="float" >0.013646697666296366</item>
              <item type="float" >0</item>
              <item type="float" >0.13925637097897228</item>
              <item type="float" >-9.812296365876013e-18</item>
              <item type="float" >0</item>
              <item type="float" >0</item>
              <item type="float" >0.042013238359126605</item>
             </vector>
            </matrix>
           </orth_to_frac>
           <valid type="bool" >true</valid>
          </value>
         </cell>
         <molecule type="Handle" >
          <serial_number type="int" >6</serial_number>
          <value type="Molecule3d" >
           <atoms type="Container" >
            <count type="int" >48</count>
            <item type="Handle" >
             <serial_number type="int" >7</serial_number>
             <value type="Atom3d" >
              <element type="Element" >
               <code type="char" >64</code>
              </element>
              <formal_charge type="int" >0</formal_charge>
              <radius type="float" >0.68000000000000005</radius>
              <label type="string" >O1</label>
              <site type="Handle" >
               <serial_number type="int" >8</serial_number>
               <value type="Site" >
                <orthogonal type="Point" >
                 <coordinates type="Vector" >
                  <vector type="Container" >
                   <count type="int" >3</count>
                   <item type="float" >-0.61005266221106491</item>
                   <item type="float" >1.43914421</item>
                   <item type="float" >-0.22040671849301599</item>
                  </vector>
                 </coordinates>
                </orthogonal>
                <fractional type="Point" >
                 <coordinates type="Vector" >
                  <vector type="Container" >
                   <count type="int" >3</count>
                   <item type="float" >-0.062109999999999999</item>
                   <item type="float" >0.20041</item>
                   <item type="float" >-0.0092599999999999991</item>
                  </vector>
                 </coordinates>
                </fractional>
                <uncertain_value type="UncertainValue" >
                 <value type="float" >1</value>
                 <uncertainty type="Uncertainty" >
                  <precision type="int" >0</precision>
                  <uncertainty type="int" >0</uncertainty>
                 </uncertainty>
                </uncertain_value>
                <uncertainty type="Handle" >
                 <serial_number type="int" >9</serial_number>
                 <value type="Container" >
                  <count type="int" >3</count>
                  <item type="Uncertainty" >
                   <precision type="int" >5</precision>
                   <uncertainty type="int" >11</uncertainty>
                  </item>
                  <item type="Uncertainty" >
                   <precision type="int" >5</precision>
                   <uncertainty type="int" >15</uncertainty>
                  </item>
                  <item type="Uncertainty" >
                   <precision type="int" >5</precision>
                   <uncertainty type="int" >4</uncertainty>
                  </item>
                 </value>
                </uncertainty>
                <adps type="Handle" >
                 <serial_number type="int" >10</serial_number>
                 <value type="AtomicDisplacementParameters" >
                  <uvalues type="Container" >
                   <count type="int" >6</count>
                   <item type="UncertainValue" >
                    <value type="float" >0.038899999999999997</value>
                    <uncertainty type="Uncertainty" >
                     <precision type="int" >4</precision>
                     <uncertainty type="int" >6</uncertainty>
                    </uncertainty>
                   </item>
                   <item type="UncertainValue" >
                    <value type="float" >0.031399999999999997</value>
                    <uncertainty type="Uncertainty" >
                     <precision type="int" >4</precision>
                     <uncertainty type="int" >6</uncertainty>
                    </uncertainty>
                   </item>
                   <item type="UncertainValue" >
                    <value type="float" >0.027199999999999998</value>
                    <uncertainty type="Uncertainty" >
                     <precision type="int" >4</precision>
                     <uncertainty type="int" >5</uncertainty>
                    </uncertainty>
                   </item>
                   <item type="UncertainValue" >
                    <value type="float" >-0.0038999999999999998</value>
                    <uncertainty type="Uncertainty" >
                     <precision type="int" >4</precision>
                     <uncertainty type="int" >5</uncertainty>
                    </uncertainty>
                   </item>
                   <item type="UncertainValue" >
                    <value type="float" >0.0080000000000000002</value>
                    <uncertainty type="Uncertainty" >
                     <precision type="int" >4</precision>
                     <uncertainty type="int" >5</uncertainty>
                    </uncertainty>
                   </item>
                   <item type="UncertainValue" >
                    <value type="float" >0.0044000000000000003</value>
                    <uncertainty type="Uncertainty" >
                     <precision type="int" >4</precision>
                     <uncertainty type="int" >4</uncertainty>
                    </uncertainty>
                   </item>
                  </uvalues>
                  <type type="AtomicDisplacementParameters::Type" >
                   <enumerator type="int" >0</enumerator>
                  </type>
                  <u_equivalent type="float" >0.032178506387979942</u_equivalent>
                 </value>
                </adps>
               </value>
              </site>
              <annotations type="Annotations" >
               <annotations type="Container" >
                <count type="int" >1</count>
                <item type="Handle" >
                 <serial_number type="int" >11</serial_number>
                 <value type="FileOrdering" >
                  <value type="Handle" >
                   <serial_number type="int" >12</serial_number>
                   <value type="FileOrdering" >
                    <file_order type="int" >0</file_order>
                   </value>
                  </value>
                 </value>
                </item>
               </annotations>
              </annotations>
             </value>
            </item>
            <item type="Handle" >
             <serial_number type="int" >13</serial_number>
             <value type="Atom3d" >
              <element type="Element" >
               <code type="char" >64</code>
              </element>
              <formal_charge type="int" >0</formal_charge>
              <radius type="float" >0.68000000000000005</radius>
              <label type="string" >O1A</label>
              <site type="Handle" >
               <serial_number type="int" >14</serial_number>
               <value type="Site" >
                <orthogonal type="Point" >
                 <coordinates type="Vector" >
                  <vector type="Container" >
                   <count type="int" >3</count>
                   <item type="float" >-1.7811262945329551</item>
                   <item type="float" >0.39926360000000027</item>
                   <item type="float" >4.1663058320753263</item>
                  </vector>
                 </coordinates>
                </orthogonal>
                <fractional type="Point" >
                 <coordinates type="Vector" >
                  <vector type="Container" >
                   <count type="int" >3</count>
                   <item type="float" >-0.1157</item>
                   <item type="float" >0.055599999999999997</item>
                   <item type="float" >0.17504</item>
                  </vector>
                 </coordinates>
                </fractional>
                <uncertain_value type="UncertainValue" >
                 <value type="float" >0.097000000000000003</value>
                 <uncertainty type="Uncertainty" >
                  <precision type="int" >3</precision>
                  <uncertainty type="int" >4</uncertainty>
                 </uncertainty>
                </uncertain_value>
                <uncertainty type="Handle" >
                 <serial_number type="int" >15</serial_number>
                 <value type="Container" >
                  <count type="int" >3</count>
                  <item type="Uncertainty" >
                   <precision type="int" >4</precision>
                   <uncertainty type="int" >12</uncertainty>
                  </item>
                  <item type="Uncertainty" >
                   <precision type="int" >4</precision>
                   <uncertainty type="int" >16</uncertainty>
                  </item>
                  <item type="Uncertainty" >
                   <precision type="int" >5</precision>
                   <uncertainty type="int" >12</uncertainty>
                  </item>
                 </value>
                </uncertainty>
                <adps type="Handle" >
                 <serial_number type="int" >16</serial_number>
                 <value type="AtomicDisplacementParameters" >
                  <uvalues type="Container" >
                   <count type="int" >6</count>
                   <item type="UncertainValue" >
                    <value type="float" >0.039</value>
                    <uncertainty type="Uncertainty" >
                     <precision type="int" >3</precision>
                     <uncertainty type="int" >8</uncertainty>
                    </uncertainty>
                   </item>
                   <item type="UncertainValue" >
                    <value type="float" >0.037999999999999999</value>
                    <uncertainty type="Uncertainty" >
                     <precision type="int" >3</precision>
                     <uncertainty type="int" >7</uncertainty>
                    </uncertainty>
                   </item>
                   <item type="UncertainValue" >
                    <value type="float" >0.032000000000000001</value>
                    <uncertainty type="Uncertainty" >
                     <precision type="int" >3</precision>
                     <uncertainty type="int" >7</uncertainty>
                    </uncertainty>
                   </item>
                   <item type="UncertainValue" >
                    <value type="float" >-0.014</value>
                    <uncertainty type="Uncertainty" >
                     <precision type="int" >3</precision>
                     <uncertainty type="int" >5</uncertainty>
                    </uncertainty>
                   </item>
                   <item type="UncertainValue" >
                    <value type="float" >-0.0040000000000000001</value>
                    <uncertainty type="Uncertainty" >
                     <precision type="int" >3</precision>
                     <uncertainty type="int" >5</uncertainty>
                    </uncertainty>
                   </item>
                   <item type="UncertainValue" >
                    <value type="float" >0.0050000000000000001</value>
                    <uncertainty type="Uncertainty" >
                     <precision type="int" >3</precision>
                     <uncertainty type="int" >5</uncertainty>
                    </uncertainty>
                   </item>
                  </uvalues>
                  <type type="AtomicDisplacementParameters::Type" >
                   <enumerator type="int" >0</enumerator>
                  </type>
                  <u_equivalent type="float" >0.037182262726440769</u_equivalent>
                 </value>
                </adps>
               </value>
              </site>
              <annotations type="Annotations" >
               <annotations type="Container" >
                <count type="int" >1</count>
                <item type="Handle" >
                 <serial_number type="int" >17</serial_number>
                 <value type="FileOrdering" >
                  <value type="Handle" >
                   <serial_number type="int" >18</serial_number>
                   <value type="FileOrdering" >
                    <file_order type="int" >1</file_order>
                   </value>
                  </value>
                 </value>
                </item>
               </annotations>
              </annotations>
             </value>
            </item>
            <item type="Handle" >
             <serial_number type="int" >19</serial_number>
             <value type="Atom3d" >
              <element type="Element" >
               <code type="char" >56</code>
              </element>
              <formal_charge type="int" >0</formal_charge>
              <radius type="float" >0.68000000000000005</radius>
              <label type="string" >N1</label>
              <site type="Handle" >
               <serial_number type="int" >20</serial_number>
               <value type="Site" >
                <orthogonal type="Point" >
                 <coordinates type="Vector" >
                  <vector type="Container" >
                   <count type="int" >3</count>
                   <item type="float" >-1.2258615646810376</item>
                   <item type="float" >0.95248784000000009</item>
                   <item type="float" >0.78641878822994049</item>
                  </vector>
                 </coordinates>
                </orthogonal>
                <fractional type="Point" >
                 <coordinates type="Vector" >
                  <vector type="Container" >
                   <count type="int" >3</count>
                   <item type="float" >-0.10803</item>
                   <item type="float" >0.13264000000000001</item>
                   <item type="float" >0.03304</item>
                  </vector>
                 </coordinates>
                </fractional>
                <uncertain_value type="UncertainValue" >
                 <value type="float" >1</value>
                 <uncertainty type="Uncertainty" >
                  <precision type="int" >0</precision>
                  <uncertainty type="int" >0</uncertainty>
                 </uncertainty>
                </uncertain_value>
                <uncertainty type="Handle" >
                 <serial_number type="int" >21</serial_number>
                 <value type="Container" >
                  <count type="int" >3</count>
                  <item type="Uncertainty" >
                   <precision type="int" >5</precision>
                   <uncertainty type="int" >12</uncertainty>
                  </item>
                  <item type="Uncertainty" >
                   <precision type="int" >5</precision>
                   <uncertainty type="int" >17</uncertainty>
                  </item>
                  <item type="Uncertainty" >
                   <precision type="int" >5</precision>
                   <uncertainty type="int" >5</uncertainty>
                  </item>
                 </value>
                </uncertainty>
                <adps type="Handle" >
                 <serial_number type="int" >22</serial_number>
                 <value type="AtomicDisplacementParameters" >
                  <uvalues type="Container" >
                   <count type="int" >6</count>
                   <item type="UncertainValue" >
                    <value type="float" >0.029399999999999999</value>
                    <uncertainty type="Uncertainty" >
                     <precision type="int" >4</precision>
                     <uncertainty type="int" >7</uncertainty>
                    </uncertainty>
                   </item>
                   <item type="UncertainValue" >
                    <value type="float" >0.0264</value>
                    <uncertainty type="Uncertainty" >
                     <precision type="int" >4</precision>
                     <uncertainty type="int" >6</uncertainty>
                    </uncertainty>
                   </item>
                   <item type="UncertainValue" >
                    <value type="float" >0.0241</value>
                    <uncertainty type="Uncertainty" >
                     <precision type="int" >4</precision>
                     <uncertainty type="int" >6</uncertainty>
                    </uncertainty>
                   </item>
                   <item type="UncertainValue" >
                    <value type="float" >-0.0038999999999999998</value>
                    <uncertainty type="Uncertainty" >
                     <precision type="int" >4</precision>
                     <uncertainty type="int" >5</uncertainty>
                    </uncertainty>
                   </item>
                   <item type="UncertainValue" >
                    <value type="float" >0.0047999999999999996</value>
                    <uncertainty type="Uncertainty" >
                     <precision type="int" >4</precision>
                     <uncertainty type="int" >5</uncertainty>
                    </uncertainty>
                   </item>
                   <item type="UncertainValue" >
                    <value type="float" >0</value>
                    <uncertainty type="Uncertainty" >
                     <precision type="int" >4</precision>
                     <uncertainty type="int" >5</uncertainty>
                    </uncertainty>
                   </item>
                  </uvalues>
                  <type type="AtomicDisplacementParameters::Type" >
                   <enumerator type="int" >0</enumerator>
                  </type>
                  <u_equivalent type="float" >0.02653197437905189</u_equivalent>
                 </value>
                </adps>
               </value>
              </site>
              <annotations type="Annotations" >
               <annotations type="Container" >
                <count type="int" >1</count>
                <item type="Handle" >
                 <serial_number type="int" >23</serial_number>
                 <value type="FileOrdering" >
                  <value type="Handle" >
                   <serial_number type="int" >24</serial_number>
                   <value type="FileOrdering" >
                    <file_order type="int" >2</file_order>
                   </value>
                  </value>
                 </value>
                </item>
               </annotations>
              </annotations>
             </value>
            </item>
            <item type="Handle" >
             <serial_number type="int" >25</serial_number>
             <value type="Atom3d" >
              <element type="Element" >
               <code type="char" >56</code>
              </element>
              <formal_charge type="int" >0</formal_charge>
              <radius type="float" >0.68000000000000005</radius>
              <label type="string" >N2</label>
              <site type="Handle" >
               <serial_number type="int" >26</serial_number>
               <value type="Site" >
                <orthogonal type="Point" >
                 <coordinates type="Vector" >
                  <vector type="Container" >
                   <count type="int" >3</count>
                   <item type="float" >-1.6139546721917151</item>
                   <item type="float" >0.32070346000000022</item>
                   <item type="float" >2.9055127566352552</item>
                  </vector>
                 </coordinates>
                </orthogonal>
                <fractional type="Point" >
                 <coordinates type="Vector" >
                  <vector type="Container" >
                   <count type="int" >3</count>
                   <item type="float" >-0.11670999999999999</item>
                   <item type="float" >0.044659999999999998</item>
                   <item type="float" >0.12207</item>
                  </vector>
                 </coordinates>
                </fractional>
                <uncertain_value type="UncertainValue" >
                 <value type="float" >1</value>
                 <uncertainty type="Uncertainty" >
                  <precision type="int" >0</precision>
                  <uncertainty type="int" >0</uncertainty>
                 </uncertainty>
                </uncertain_value>
                <uncertainty type="Handle" >
                 <serial_number type="int" >27</serial_number>
                 <value type="Container" >
                  <count type="int" >3</count>
                  <item type="Uncertainty" >
                   <precision type="int" >5</precision>
                   <uncertainty type="int" >13</uncertainty>
                  </item>
                  <item type="Uncertainty" >
                   <precision type="int" >5</precision>
                   <uncertainty type="int" >18</uncertainty>
                  </item>
                  <item type="Uncertainty" >
                   <precision type="int" >5</precision>
                   <uncertainty type="int" >5</uncertainty>
                  </item>
                 </value>
                </uncertainty>
                <adps type="Handle" >
                 <serial_number type="int" >28</serial_number>
                 <value type="AtomicDisplacementParameters" >
                  <uvalues type="Container" >
                   <count type="int" >6</count>
                   <item type="UncertainValue" >
                    <value type="float" >0.030099999999999998</value>
                    <uncertainty type="Uncertainty" >
                     <precision type="int" >4</precision>
                     <uncertainty type="int" >7</uncertainty>
                    </uncertainty>
                   </item>
                   <item type="UncertainValue" >
                    <value type="float" >0.0292</value>
                    <uncertainty type="Uncertainty" >
                     <precision type="int" >4</precision>
                     <uncertainty type="int" >7</uncertainty>
                    </uncertainty>
                   </item>
                   <item type="UncertainValue" >
                    <value type="float" >0.026200000000000001</value>
                    <uncertainty type="Uncertainty" >
                     <precision type="int" >4</precision>
                     <uncertainty type="int" >6</uncertainty>
                    </uncertainty>
                   </item>
                   <item type="UncertainValue" >
                    <value type="float" >-0.0044999999999999997</value>
                    <uncertainty type="Uncertainty" >
                     <precision type="int" >4</precision>
                     <uncertainty type="int" >5</uncertainty>
                    </uncertainty>
                   </item>
                   <item type="UncertainValue" >
                    <value type="float" >0.0030000000000000001</value>
                    <uncertainty type="Uncertainty" >
                     <precision type="int" >4</precision>
                     <uncertainty type="int" >5</uncertainty>
                    </uncertainty>
                   </item>
                   <item type="UncertainValue" >
                    <value type="float" >-0.0023</value>
                    <uncertainty type="Uncertainty" >
                     <precision type="int" >4</precision>
                     <uncertainty type="int" >5</uncertainty>
                    </uncertainty>
                   </item>
                  </uvalues>
                  <type type="AtomicDisplacementParameters::Type" >
                   <enumerator type="int" >0</enumerator>
                  </type>
                  <u_equivalent type="float" >0.028587862324862084</u_equivalent>
                 </value>
                </adps>
               </value>
              </site>
              <annotations type="Annotations" >
               <annotations type="Container" >
                <count type="int" >1</count>
                <item type="Handle" >
                 <serial_number type="int" >29</serial_number>
                 <value type="FileOrdering" >
                  <value type="Handle" >
                   <serial_number type="int" >30</serial_number>
                   <value type="FileOrdering" >
                    <file_order type="int" >3</file_order>
                   </value>
                  </value>
                 </value>
                </item>
               </annotations>
              </annotations>
             </value>
            </item>
            <item type="Handle" >
             <serial_number type="int" >31</serial_number>
             <value type="Atom3d" >
              <element type="Element" >
               <code type="char" >1</code>
              </element>
              <formal_charge type="int" >0</formal_charge>
              <radius type="float" >0.68000000000000005</radius>
              <label type="string" >C1</label>
              <site type="Handle" >
               <serial_number type="int" >32</serial_number>
               <value type="Site" >
                <orthogonal type="Point" >
                 <coordinates type="Vector" >
                  <vector type="Container" >
                   <count type="int" >3</count>
                   <item type="float" >-2.6836824460555135</item>
                   <item type="float" >0.6168479</item>
                   <item type="float" >0.77427975729781984</item>
                  </vector>
                 </coordinates>
                </orthogonal>
                <fractional type="Point" >
                 <coordinates type="Vector" >
                  <vector type="Container" >
                   <count type="int" >3</count>
                   <item type="float" >-0.24943000000000001</item>
                   <item type="float" >0.085900000000000004</item>
                   <item type="float" >0.032530000000000003</item>
                  </vector>
                 </coordinates>
                </fractional>
                <uncertain_value type="UncertainValue" >
                 <value type="float" >1</value>
                 <uncertainty type="Uncertainty" >
                  <precision type="int" >0</precision>
                  <uncertainty type="int" >0</uncertainty>
                 </uncertainty>
                </uncertain_value>
                <uncertainty type="Handle" >
                 <serial_number type="int" >33</serial_number>
                 <value type="Container" >
                  <count type="int" >3</count>
                  <item type="Uncertainty" >
                   <precision type="int" >5</precision>
                   <uncertainty type="int" >14</uncertainty>
                  </item>
                  <item type="Uncertainty" >
                   <precision type="int" >4</precision>
                   <uncertainty type="int" >2</uncertainty>
                  </item>
                  <item type="Uncertainty" >
                   <precision type="int" >5</precision>
                   <uncertainty type="int" >6</uncertainty>
                  </item>
                 </value>
                </uncertainty>
                <adps type="Handle" >
                 <serial_number type="int" >34</serial_number>
                 <value type="AtomicDisplacementParameters" >
                  <uvalues type="Container" >
                   <count type="int" >6</count>
                   <item type="UncertainValue" >
                    <value type="float" >0.026200000000000001</value>
                    <uncertainty type="Uncertainty" >
                     <precision type="int" >4</precision>
                     <uncertainty type="int" >8</uncertainty>
                    </uncertainty>
                   </item>
                   <item type="UncertainValue" >
                    <value type="float" >0.025499999999999998</value>
                    <uncertainty type="Uncertainty" >
                     <precision type="int" >4</precision>
                     <uncertainty type="int" >7</uncertainty>
                    </uncertainty>
                   </item>
                   <item type="UncertainValue" >
                    <value type="float" >0.025600000000000001</value>
                    <uncertainty type="Uncertainty" >
                     <precision type="int" >4</precision>
                     <uncertainty type="int" >7</uncertainty>
                    </uncertainty>
                   </item>
                   <item type="UncertainValue" >
                    <value type="float" >-0.0018</value>
                    <uncertainty type="Uncertainty" >
                     <precision type="int" >4</precision>
                     <uncertainty type="int" >6</uncertainty>
                    </uncertainty>
                   </item>
                   <item type="UncertainValue" >
                    <value type="float" >0.0038999999999999998</value>
                    <uncertainty type="Uncertainty" >
                     <precision type="int" >4</precision>
                     <uncertainty type="int" >6</uncertainty>
                    </uncertainty>
                   </item>
                   <item type="UncertainValue" >
                    <value type="float" >-0.0001</value>
                    <uncertainty type="Uncertainty" >
                     <precision type="int" >4</precision>
                     <uncertainty type="int" >6</uncertainty>
                    </uncertainty>
                   </item>
                  </uvalues>
                  <type type="AtomicDisplacementParameters::Type" >
                   <enumerator type="int" >0</enumerator>
                  </type>
                  <u_equivalent type="float" >0.025739415074494214</u_equivalent>
                 </value>
                </adps>
               </value>
              </site>
              <annotations type="Annotations" >
               <annotations type="Container" >
                <count type="int" >1</count>
                <item type="Handle" >
                 <serial_number type="int" >35</serial_number>
                 <value type="FileOrdering" >
                  <value type="Handle" >
                   <serial_number type="int" >36</serial_number>
                   <value type="FileOrdering" >
                    <file_order type="int" >4</file_order>
                   </value>
                  </value>
                 </value>
                </item>
               </annotations>
              </annotations>
             </value>
            </item>
            <item type="Handle" >
             <serial_number type="int" >37</serial_number>
             <value type="Atom3d" >
              <element type="Element" >
               <code type="char" >1</code>
              </element>
              <formal_charge type="int" >0</formal_charge>
              <radius type="float" >0.68000000000000005</radius>
              <label type="string" >C2</label>
              <site type="Handle" >
               <serial_number type="int" >38</serial_number>
               <value type="Site" >
                <orthogonal type="Point" >
                 <coordinates type="Vector" >
                  <vector type="Container" >
                   <count type="int" >3</count>
                   <item type="float" >-3.4255517821927817</item>
                   <item type="float" >1.9553863</item>
                   <item type="float" >0.88805341975965746</item>
                  </vector>
                 </coordinates>
                </orthogonal>
                <fractional type="Point" >
                 <coordinates type="Vector" >
                  <vector type="Container" >
                   <count type="int" >3</count>
                   <item type="float" >-0.31974999999999998</item>
                   <item type="float" >0.27229999999999999</item>
                   <item type="float" >0.037310000000000003</item>
                  </vector>
                 </coordinates>
                </fractional>
                <uncertain_value type="UncertainValue" >
                 <value type="float" >1</value>
                 <uncertainty type="Uncertainty" >
                  <precision type="int" >0</precision>
                  <uncertainty type="int" >0</uncertainty>
                 </uncertainty>
                </uncertain_value>
                <uncertainty type="Handle" >
                 <serial_number type="int" >39</serial_number>
                 <value type="Container" >
                  <count type="int" >3</count>
                  <item type="Uncertainty" >
                   <precision type="int" >5</precision>
                   <uncertainty type="int" >16</uncertainty>
                  </item>
                  <item type="Uncertainty" >
                   <precision type="int" >4</precision>
                   <uncertainty type="int" >2</uncertainty>
                  </item>
                  <item type="Uncertainty" >
                   <precision type="int" >5</precision>
                   <uncertainty type="int" >7</uncertainty>
                  </item>
                 </value>
                </uncertainty>
                <adps type="Handle" >
                 <serial_number type="int" >40</serial_number>
                 <value type="AtomicDisplacementParameters" >
                  <uvalues type="Container" >
                   <count type="int" >6</count>
                   <item type="UncertainValue" >
                    <value type="float" >0.037100000000000001</value>
                    <uncertainty type="Uncertainty" >
                     <precision type="int" >4</precision>
                     <uncertainty type="int" >9</uncertainty>
                    </uncertainty>
                   </item>
                   <item type="UncertainValue" >
                    <value type="float" >0.025999999999999999</value>
                    <uncertainty type="Uncertainty" >
                     <precision type="int" >4</precision>
                     <uncertainty type="int" >8</uncertainty>
                    </uncertainty>
                   </item>
                   <item type="UncertainValue" >
                    <value type="float" >0.037400000000000003</value>
                    <uncertainty type="Uncertainty" >
                     <precision type="int" >4</precision>
                     <uncertainty type="int" >8</uncertainty>
                    </uncertainty>
                   </item>
                   <item type="UncertainValue" >
                    <value type="float" >0.0025000000000000001</value>
                    <uncertainty type="Uncertainty" >
                     <precision type="int" >4</precision>
                     <uncertainty type="int" >7</uncertainty>
                    </uncertainty>
                   </item>
                   <item type="UncertainValue" >
                    <value type="float" >0.0047999999999999996</value>
                    <uncertainty type="Uncertainty" >
                     <precision type="int" >4</precision>
                     <uncertainty type="int" >7</uncertainty>
                    </uncertainty>
                   </item>
                   <item type="UncertainValue" >
                    <value type="float" >0.00020000000000000001</value>
                    <uncertainty type="Uncertainty" >
                     <precision type="int" >4</precision>
                     <uncertainty type="int" >7</uncertainty>
                    </uncertainty>
                   </item>
                  </uvalues>
                  <type type="AtomicDisplacementParameters::Type" >
                   <enumerator type="int" >0</enumerator>
                  </type>
                  <u_equivalent type="float" >0.03353753421562769</u_equivalent>
                 </value>
                </adps>
               </value>
              </site>
              <annotations type="Annotations" >
               <annotations type="Container" >
                <count type="int" >1</count>
                <item type="Handle" >
                 <serial_number type="int" >41</serial_number>
                 <value type="FileOrdering" >
                  <value type="Handle" >
                   <serial_number type="int" >42</serial_number>
                   <value type="FileOrdering" >
                    <file_order type="int" >5</file_order>
                   </value>
                  </value>
                 </value>
                </item>
               </annotations>
              </annotations>
             </value>
            </item>
            <item type="Handle" >
             <serial_number type="int" >43</serial_number>
             <value type="Atom3d" >
              <element type="Element" >
               <code type="char" >2</code>
              </element>
              <formal_charge type="int" >0</formal_charge>
              <radius type="float" >0.23000000000000001</radius>
              <label type="string" >H2A</label>
              <site type="Handle" >
               <serial_number type="int" >44</serial_number>
               <value type="Site" >
                <orthogonal type="Point" >
                 <coordinates type="Vector" >
                  <vector type="Container" >
                   <count type="int" >3</count>
                   <item type="float" >-3.1710880115501849</item>
                   <item type="float" >2.5341749</item>
                   <item type="float" >0.14043192646963223</item>
                  </vector>
                 </coordinates>
                </orthogonal>
                <fractional type="Point" >
                 <coordinates type="Vector" >
                  <vector type="Container" >
                   <count type="int" >3</count>
                   <item type="float" >-0.30530000000000002</item>
                   <item type="float" >0.35289999999999999</item>
                   <item type="float" >0.0058999999999999999</item>
                  </vector>
                 </coordinates>
                </fractional>
                <uncertain_value type="UncertainValue" >
                 <value type="float" >1</value>
                 <uncertainty type="Uncertainty" >
                  <precision type="int" >0</precision>
                  <uncertainty type="int" >0</uncertainty>
                 </uncertainty>
                </uncertain_value>
                <uncertainty type="Handle" >
                 <serial_number type="int" >45</serial_number>
                 <value type="Container" >
                  <count type="int" >3</count>
                  <item type="Uncertainty" >
                   <precision type="int" >4</precision>
                   <uncertainty type="int" >0</uncertainty>
                  </item>
                  <item type="Uncertainty" >
                   <precision type="int" >4</precision>
                   <uncertainty type="int" >0</uncertainty>
                  </item>
                  <item type="Uncertainty" >
                   <precision type="int" >4</precision>
                   <uncertainty type="int" >0</uncertainty>
                  </item>
                 </value>
                </uncertainty>
                <adps type="Handle" >
                 <serial_number type="int" >46</serial_number>
                 <value type="AtomicDisplacementParameters" >
                  <uvalues type="Container" >
                   <count type="int" >6</count>
                   <item type="UncertainValue" >
                    <value type="float" >0.049999999999999996</value>
                    <uncertainty type="Uncertainty" >
                     <precision type="int" >1000000</precision>
                     <uncertainty type="int" >0</uncertainty>
                    </uncertainty>
                   </item>
                   <item type="UncertainValue" >
                    <value type="float" >0.050000000000000017</value>
                    <uncertainty type="Uncertainty" >
                     <precision type="int" >1000000</precision>
                     <uncertainty type="int" >0</uncertainty>
                    </uncertainty>
                   </item>
                   <item type="UncertainValue" >
                    <value type="float" >0.05000000000000001</value>
                    <uncertainty type="Uncertainty" >
                     <precision type="int" >1000000</precision>
                     <uncertainty type="int" >0</uncertainty>
                    </uncertainty>
                   </item>
                   <item type="UncertainValue" >
                    <value type="float" >-3.5231050101677831e-18</value>
                    <uncertainty type="Uncertainty" >
                     <precision type="int" >1000000</precision>
                     <uncertainty type="int" >0</uncertainty>
                    </uncertainty>
                   </item>
                   <item type="UncertainValue" >
                    <value type="float" >0.0069742097988007568</value>
                    <uncertainty type="Uncertainty" >
                     <precision type="int" >1000000</precision>
                     <uncertainty type="int" >0</uncertainty>
                    </uncertainty>
                   </item>
                   <item type="UncertainValue" >
                    <value type="float" >-3.5231050101677831e-18</value>
                    <uncertainty type="Uncertainty" >
                     <precision type="int" >1000000</precision>
                     <uncertainty type="int" >0</uncertainty>
                    </uncertainty>
                   </item>
                  </uvalues>
                  <type type="AtomicDisplacementParameters::Type" >
                   <enumerator type="int" >1</enumerator>
                  </type>
                  <u_equivalent type="float" >0.050000000000000003</u_equivalent>
                 </value>
                </adps>
               </value>
              </site>
              <annotations type="Annotations" >
               <annotations type="Container" >
                <count type="int" >1</count>
                <item type="Handle" >
                 <serial_number type="int" >47</serial_number>
                 <value type="FileOrdering" >
                  <value type="Handle" >
                   <serial_number type="int" >48</serial_number>
                   <value type="FileOrdering" >
                    <file_order type="int" >6</file_order>
                   </value>
                  </value>
                 </value>
                </item>
               </annotations>
              </annotations>
             </value>
            </item>
            <item type="Handle" >
             <serial_number type="int" >49</serial_number>
             <value type="Atom3d" >
              <element type="Element" >
               <code type="char" >2</code>
              </element>
              <formal_charge type="int" >0</formal_charge>
              <radius type="float" >0.23000000000000001</radius>
              <label type="string" >H2B</label>
              <site type="Handle" >
               <serial_number type="int" >50</serial_number>
               <value type="Site" >
                <orthogonal type="Point" >
                 <coordinates type="Vector" >
                  <vector type="Container" >
                   <count type="int" >3</count>
                   <item type="float" >-3.1868847018395745</item>
                   <item type="float" >2.3898367999999999</item>
                   <item type="float" >1.7327871605066485</item>
                  </vector>
                 </coordinates>
                </orthogonal>
                <fractional type="Point" >
                 <coordinates type="Vector" >
                  <vector type="Container" >
                   <count type="int" >3</count>
                   <item type="float" >-0.28510000000000002</item>
                   <item type="float" >0.33279999999999998</item>
                   <item type="float" >0.072800000000000004</item>
                  </vector>
                 </coordinates>
                </fractional>
                <uncertain_value type="UncertainValue" >
                 <value type="float" >1</value>
                 <uncertainty type="Uncertainty" >
                  <precision type="int" >0</precision>
                  <uncertainty type="int" >0</uncertainty>
                 </uncertainty>
                </uncertain_value>
                <uncertainty type="Handle" >
                 <serial_number type="int" >51</serial_number>
                 <value type="Container" >
                  <count type="int" >3</count>
                  <item type="Uncertainty" >
                   <precision type="int" >4</precision>
                   <uncertainty type="int" >0</uncertainty>
                  </item>
                  <item type="Uncertainty" >
                   <precision type="int" >4</precision>
                   <uncertainty type="int" >0</uncertainty>
                  </item>
                  <item type="Uncertainty" >
                   <precision type="int" >4</precision>
                   <uncertainty type="int" >0</uncertainty>
                  </item>
                 </value>
                </uncertainty>
                <adps type="Handle" >
                 <serial_number type="int" >52</serial_number>
                 <value type="AtomicDisplacementParameters" >
                  <uvalues type="Container" >
                   <count type="int" >6</count>
                   <item type="UncertainValue" >
                    <value type="float" >0.049999999999999996</value>
                    <uncertainty type="Uncertainty" >
                     <precision type="int" >1000000</precision>
                     <uncertainty type="int" >0</uncertainty>
                    </uncertainty>
                   </item>
                   <item type="UncertainValue" >
                    <value type="float" >0.050000000000000017</value>
                    <uncertainty type="Uncertainty" >
                     <precision type="int" >1000000</precision>
                     <uncertainty type="int" >0</uncertainty>
                    </uncertainty>
                   </item>
                   <item type="UncertainValue" >
                    <value type="float" >0.05000000000000001</value>
                    <uncertainty type="Uncertainty" >
                     <precision type="int" >1000000</precision>
                     <uncertainty type="int" >0</uncertainty>
                    </uncertainty>
                   </item>
                   <item type="UncertainValue" >
                    <value type="float" >-3.5231050101677831e-18</value>
                    <uncertainty type="Uncertainty" >
                     <precision type="int" >1000000</precision>
                     <uncertainty type="int" >0</uncertainty>
                    </uncertainty>
                   </item>
                   <item type="UncertainValue" >
                    <value type="float" >0.0069742097988007568</value>
                    <uncertainty type="Uncertainty" >
                     <precision type="int" >1000000</precision>
                     <uncertainty type="int" >0</uncertainty>
                    </uncertainty>
                   </item>
                   <item type="UncertainValue" >
                    <value type="float" >-3.5231050101677831e-18</value>
                    <uncertainty type="Uncertainty" >
                     <precision type="int" >1000000</precision>
                     <uncertainty type="int" >0</uncertainty>
                    </uncertainty>
                   </item>
                  </uvalues>
                  <type type="AtomicDisplacementParameters::Type" >
                   <enumerator type="int" >1</enumerator>
                  </type>
                  <u_equivalent type="float" >0.050000000000000003</u_equivalent>
                 </value>
                </adps>
               </value>
              </site>
              <annotations type="Annotations" >
               <annotations type="Container" >
                <count type="int" >1</count>
                <item type="Handle" >
                 <serial_number type="int" >53</serial_number>
                 <value type="FileOrdering" >
                  <value type="Handle" >
                   <serial_number type="int" >54</serial_number>
                   <value type="FileOrdering" >
                    <file_order type="int" >7</file_order>
                   </value>
                  </value>
                 </value>
                </item>
               </annotations>
              </annotations>
             </value>
            </item>
            <item type="Handle" >
             <serial_number type="int" >55</serial_number>
             <value type="Atom3d" >
              <element type="Element" >
               <code type="char" >2</code>
              </element>
              <formal_charge type="int" >0</formal_charge>
              <radius type="float" >0.23000000000000001</radius>
              <label type="string" >H2C</label>
              <site type="Handle" >
               <serial_number type="int" >56</serial_number>
               <value type="Site" >
                <orthogonal type="Point" >
                 <coordinates type="Vector" >
                  <vector type="Container" >
                   <count type="int" >3</count>
                   <item type="float" >-4.3919173727579199</item>
                   <item type="float" >1.7959680999999998</item>
                   <item type="float" >0.86401337810977108</item>
                  </vector>
                 </coordinates>
                </orthogonal>
                <fractional type="Point" >
                 <coordinates type="Vector" >
                  <vector type="Container" >
                   <count type="int" >3</count>
                   <item type="float" >-0.41370000000000001</item>
                   <item type="float" >0.25009999999999999</item>
                   <item type="float" >0.036299999999999999</item>
                  </vector>
                 </coordinates>
                </fractional>
                <uncertain_value type="UncertainValue" >
                 <value type="float" >1</value>
                 <uncertainty type="Uncertainty" >
                  <precision type="int" >0</precision>
                  <uncertainty type="int" >0</uncertainty>
                 </uncertainty>
                </uncertain_value>
                <uncertainty type="Handle" >
                 <serial_number type="int" >57</serial_number>
                 <value type="Container" >
                  <count type="int" >3</count>
                  <item type="Uncertainty" >
                   <precision type="int" >4</precision>
                   <uncertainty type="int" >0</uncertainty>
                  </item>
                  <item type="Uncertainty" >
                   <precision type="int" >4</precision>
                   <uncertainty type="int" >0</uncertainty>
                  </item>
                  <item type="Uncertainty" >
                   <precision type="int" >4</precision>
                   <uncertainty type="int" >0</uncertainty>
                  </item>
                 </value>
                </uncertainty>
                <adps type="Handle" >
                 <serial_number type="int" >58</serial_number>
                 <value type="AtomicDisplacementParameters" >
                  <uvalues type="Container" >
                   <count type="int" >6</count>
                   <item type="UncertainValue" >
                    <value type="float" >0.049999999999999996</value>
                    <uncertainty type="Uncertainty" >
                     <precision type="int" >1000000</precision>
                     <uncertainty type="int" >0</uncertainty>
                    </uncertainty>
                   </item>
                   <item type="UncertainValue" >
                    <value type="float" >0.050000000000000017</value>
                    <uncertainty type="Uncertainty" >
                     <precision type="int" >1000000</precision>
                     <uncertainty type="int" >0</uncertainty>
                    </uncertainty>
                   </item>
                   <item type="UncertainValue" >
                    <value type="float" >0.05000000000000001</value>
                    <uncertainty type="Uncertainty" >
                     <precision type="int" >1000000</precision>
                     <uncertainty type="int" >0</uncertainty>
                    </uncertainty>
                   </item>
                   <item type="UncertainValue" >
                    <value type="float" >-3.5231050101677831e-18</value>
                    <uncertainty type="Uncertainty" >
                     <precision type="int" >1000000</precision>
                     <uncertainty type="int" >0</uncertainty>
                    </uncertainty>
                   </item>
                   <item type="UncertainValue" >
                    <value type="float" >0.0069742097988007568</value>
                    <uncertainty type="Uncertainty" >
                     <precision type="int" >1000000</precision>
                     <uncertainty type="int" >0</uncertainty>
                    </uncertainty>
                   </item>
                   <item type="UncertainValue" >
                    <value type="float" >-3.5231050101677831e-18</value>
                    <uncertainty type="Uncertainty" >
                     <precision type="int" >1000000</precision>
                     <uncertainty type="int" >0</uncertainty>
                    </uncertainty>
                   </item>
                  </uvalues>
                  <type type="AtomicDisplacementParameters::Type" >
                   <enumerator type="int" >1</enumerator>
                  </type>
                  <u_equivalent type="float" >0.050000000000000003</u_equivalent>
                 </value>
                </adps>
               </value>
              </site>
              <annotations type="Annotations" >
               <annotations type="Container" >
                <count type="int" >1</count>
                <item type="Handle" >
                 <serial_number type="int" >59</serial_number>
                 <value type="FileOrdering" >
                  <value type="Handle" >
                   <serial_number type="int" >60</serial_number>
                   <value type="FileOrdering" >
                    <file_order type="int" >8</file_order>
                   </value>
                  </value>
                 </value>
                </item>
               </annotations>
              </annotations>
             </value>
            </item>
            <item type="Handle" >
             <serial_number type="int" >61</serial_number>
             <value type="Atom3d" >
              <element type="Element" >
               <code type="char" >1</code>
              </element>
              <formal_charge type="int" >0</formal_charge>
              <radius type="float" >0.68000000000000005</radius>
              <label type="string" >C3</label>
              <site type="Handle" >
               <serial_number type="int" >62</serial_number>
               <value type="Site" >
                <orthogonal type="Point" >
                 <coordinates type="Vector" >
                  <vector type="Container" >
                   <count type="int" >3</count>
                   <item type="float" >-3.0606105565812003</item>
                   <item type="float" >-0.096943500000000044</item>
                   <item type="float" >-0.50317473314712291</item>
                  </vector>
                 </coordinates>
                </orthogonal>
                <fractional type="Point" >
                 <coordinates type="Vector" >
                  <vector type="Container" >
                   <count type="int" >3</count>
                   <item type="float" >-0.30337999999999998</item>
                   <item type="float" >-0.0135</item>
                   <item type="float" >-0.021139999999999999</item>
                  </vector>
                 </coordinates>
                </fractional>
                <uncertain_value type="UncertainValue" >
                 <value type="float" >1</value>
                 <uncertainty type="Uncertainty" >
                  <precision type="int" >0</precision>
                  <uncertainty type="int" >0</uncertainty>
                 </uncertainty>
                </uncertain_value>
                <uncertainty type="Handle" >
                 <serial_number type="int" >63</serial_number>
                 <value type="Container" >
                  <count type="int" >3</count>
                  <item type="Uncertainty" >
                   <precision type="int" >5</precision>
                   <uncertainty type="int" >15</uncertainty>
                  </item>
                  <item type="Uncertainty" >
                   <precision type="int" >4</precision>
                   <uncertainty type="int" >2</uncertainty>
                  </item>
                  <item type="Uncertainty" >
                   <precision type="int" >5</precision>
                   <uncertainty type="int" >6</uncertainty>
                  </item>
                 </value>
                </uncertainty>
                <adps type="Handle" >
                 <serial_number type="int" >64</serial_number>
                 <value type="AtomicDisplacementParameters" >
                  <uvalues type="Container" >
                   <count type="int" >6</count>
                   <item type="UncertainValue" >
                    <value type="float" >0.0315</value>
                    <uncertainty type="Uncertainty" >
                     <precision type="int" >4</precision>
                     <uncertainty type="int" >8</uncertainty>
                    </uncertainty>
                   </item>
                   <item type="UncertainValue" >
                    <value type="float" >0.030099999999999998</value>
                    <uncertainty type="Uncertainty" >
                     <precision type="int" >4</precision>
                     <uncertainty type="int" >8</uncertainty>
                    </uncertainty>
                   </item>
                   <item type="UncertainValue" >
                    <value type="float" >0.025899999999999999</value>
                    <uncertainty type="Uncertainty" >
                     <precision type="int" >4</precision>
                     <uncertainty type="int" >7</uncertainty>
                    </uncertainty>
                   </item>
                   <item type="UncertainValue" >
                    <value type="float" >-0.002</value>
                    <uncertainty type="Uncertainty" >
                     <precision type="int" >4</precision>
                     <uncertainty type="int" >6</uncertainty>
                    </uncertainty>
                   </item>
                   <item type="UncertainValue" >
                    <value type="float" >0.0023999999999999998</value>
                    <uncertainty type="Uncertainty" >
                     <precision type="int" >4</precision>
                     <uncertainty type="int" >6</uncertainty>
                    </uncertainty>
                   </item>
                   <item type="UncertainValue" >
                    <value type="float" >-0.00080000000000000004</value>
                    <uncertainty type="Uncertainty" >
                     <precision type="int" >4</precision>
                     <uncertainty type="int" >6</uncertainty>
                    </uncertainty>
                   </item>
                  </uvalues>
                  <type type="AtomicDisplacementParameters::Type" >
                   <enumerator type="int" >0</enumerator>
                  </type>
                  <u_equivalent type="float" >0.029318705077988571</u_equivalent>
                 </value>
                </adps>
               </value>
              </site>
              <annotations type="Annotations" >
               <annotations type="Container" >
                <count type="int" >1</count>
                <item type="Handle" >
                 <serial_number type="int" >65</serial_number>
                 <value type="FileOrdering" >
                  <value type="Handle" >
                   <serial_number type="int" >66</serial_number>
                   <value type="FileOrdering" >
                    <file_order type="int" >9</file_order>
                   </value>
                  </value>
                 </value>
                </item>
               </annotations>
              </annotations>
             </value>
            </item>
            <item type="Handle" >
             <serial_number type="int" >67</serial_number>
             <value type="Atom3d" >
              <element type="Element" >
               <code type="char" >2</code>
              </element>
              <formal_charge type="int" >0</formal_charge>
              <radius type="float" >0.23000000000000001</radius>
              <label type="string" >H3A</label>
              <site type="Handle" >
               <serial_number type="int" >68</serial_number>
               <value type="Site" >
                <orthogonal type="Point" >
                 <coordinates type="Vector" >
                  <vector type="Container" >
                   <count type="int" >3</count>
                   <item type="float" >-3.9976688710832988</item>
                   <item type="float" >-0.37915680000000007</item>
                   <item type="float" >-0.45461860941863991</item>
                  </vector>
                 </coordinates>
                </orthogonal>
                <fractional type="Point" >
                 <coordinates type="Vector" >
                  <vector type="Container" >
                   <count type="int" >3</count>
                   <item type="float" >-0.39350000000000002</item>
                   <item type="float" >-0.0528</item>
                   <item type="float" >-0.019099999999999999</item>
                  </vector>
                 </coordinates>
                </fractional>
                <uncertain_value type="UncertainValue" >
                 <value type="float" >1</value>
                 <uncertainty type="Uncertainty" >
                  <precision type="int" >0</precision>
                  <uncertainty type="int" >0</uncertainty>
                 </uncertainty>
                </uncertain_value>
                <uncertainty type="Handle" >
                 <serial_number type="int" >69</serial_number>
                 <value type="Container" >
                  <count type="int" >3</count>
                  <item type="Uncertainty" >
                   <precision type="int" >4</precision>
                   <uncertainty type="int" >0</uncertainty>
                  </item>
                  <item type="Uncertainty" >
                   <precision type="int" >4</precision>
                   <uncertainty type="int" >0</uncertainty>
                  </item>
                  <item type="Uncertainty" >
                   <precision type="int" >4</precision>
                   <uncertainty type="int" >0</uncertainty>
                  </item>
                 </value>
                </uncertainty>
                <adps type="Handle" >
                 <serial_number type="int" >70</serial_number>
                 <value type="AtomicDisplacementParameters" >
                  <uvalues type="Container" >
                   <count type="int" >6</count>
                   <item type="UncertainValue" >
                    <value type="float" >0.043999999999999991</value>
                    <uncertainty type="Uncertainty" >
                     <precision type="int" >1000000</precision>
                     <uncertainty type="int" >0</uncertainty>
                    </uncertainty>
                   </item>
                   <item type="UncertainValue" >
                    <value type="float" >0.044000000000000011</value>
                    <uncertainty type="Uncertainty" >
                     <precision type="int" >1000000</precision>
                     <uncertainty type="int" >0</uncertainty>
                    </uncertainty>
                   </item>
                   <item type="UncertainValue" >
                    <value type="float" >0.043999999999999997</value>
                    <uncertainty type="Uncertainty" >
                     <precision type="int" >1000000</precision>
                     <uncertainty type="int" >0</uncertainty>
                    </uncertainty>
                   </item>
                   <item type="UncertainValue" >
                    <value type="float" >-3.1003324089476489e-18</value>
                    <uncertainty type="Uncertainty" >
                     <precision type="int" >1000000</precision>
                     <uncertainty type="int" >0</uncertainty>
                    </uncertainty>
                   </item>
                   <item type="UncertainValue" >
                    <value type="float" >0.006137304622944666</value>
                    <uncertainty type="Uncertainty" >
                     <precision type="int" >1000000</precision>
                     <uncertainty type="int" >0</uncertainty>
                    </uncertainty>
                   </item>
                   <item type="UncertainValue" >
                    <value type="float" >-3.1003324089476493e-18</value>
                    <uncertainty type="Uncertainty" >
                     <precision type="int" >1000000</precision>
                     <uncertainty type="int" >0</uncertainty>
                    </uncertainty>
                   </item>
                  </uvalues>
                  <type type="AtomicDisplacementParameters::Type" >
                   <enumerator type="int" >1</enumerator>
                  </type>
                  <u_equivalent type="float" >0.043999999999999997</u_equivalent>
                 </value>
                </adps>
               </value>
              </site>
              <annotations type="Annotations" >
               <annotations type="Container" >
                <count type="int" >1</count>
                <item type="Handle" >
                 <serial_number type="int" >71</serial_number>
                 <value type="FileOrdering" >
                  <value type="Handle" >
                   <serial_number type="int" >72</serial_number>
                   <value type="FileOrdering" >
                    <file_order type="int" >10</file_order>
                   </value>
                  </value>
                 </value>
                </item>
               </annotations>
              </annotations>
             </value>
            </item>
            <item type="Handle" >
             <serial_number type="int" >73</serial_number>
             <value type="Atom3d" >
              <element type="Element" >
               <code type="char" >2</code>
              </element>
              <formal_charge type="int" >0</formal_charge>
              <radius type="float" >0.23000000000000001</radius>
              <label type="string" >H3B</label>
              <site type="Handle" >
               <serial_number type="int" >74</serial_number>
               <value type="Site" >
                <orthogonal type="Point" >
                 <coordinates type="Vector" >
                  <vector type="Container" >
                   <count type="int" >3</count>
                   <item type="float" >-2.4881666779144371</item>
                   <item type="float" >-0.88398109999999996</item>
                   <item type="float" >-0.61885255732380295</item>
                  </vector>
                 </coordinates>
                </orthogonal>
                <fractional type="Point" >
                 <coordinates type="Vector" >
                  <vector type="Container" >
                   <count type="int" >3</count>
                   <item type="float" >-0.2495</item>
                   <item type="float" >-0.1231</item>
                   <item type="float" >-0.025999999999999999</item>
                  </vector>
                 </coordinates>
                </fractional>
                <uncertain_value type="UncertainValue" >
                 <value type="float" >1</value>
                 <uncertainty type="Uncertainty" >
                  <precision type="int" >0</precision>
                  <uncertainty type="int" >0</uncertainty>
                 </uncertainty>
                </uncertain_value>
                <uncertainty type="Handle" >
                 <serial_number type="int" >75</serial_number>
                 <value type="Container" >
                  <count type="int" >3</count>
                  <item type="Uncertainty" >
                   <precision type="int" >4</precision>
                   <uncertainty type="int" >0</uncertainty>
                  </item>
                  <item type="Uncertainty" >
                   <precision type="int" >4</precision>
                   <uncertainty type="int" >0</uncertainty>
                  </item>
                  <item type="Uncertainty" >
                   <precision type="int" >4</precision>
                   <uncertainty type="int" >0</uncertainty>
                  </item>
                 </value>
                </uncertainty>
                <adps type="Handle" >
                 <serial_number type="int" >76</serial_number>
                 <value type="AtomicDisplacementParameters" >
                  <uvalues type="Container" >
                   <count type="int" >6</count>
                   <item type="UncertainValue" >
                    <value type="float" >0.043999999999999991</value>
                    <uncertainty type="Uncertainty" >
                     <precision type="int" >1000000</precision>
                     <uncertainty type="int" >0</uncertainty>
                    </uncertainty>
                   </item>
                   <item type="UncertainValue" >
                    <value type="float" >0.044000000000000011</value>
                    <uncertainty type="Uncertainty" >
                     <precision type="int" >1000000</precision>
                     <uncertainty type="int" >0</uncertainty>
                    </uncertainty>
                   </item>
                   <item type="UncertainValue" >
                    <value type="float" >0.043999999999999997</value>
                    <uncertainty type="Uncertainty" >
                     <precision type="int" >1000000</precision>
                     <uncertainty type="int" >0</uncertainty>
                    </uncertainty>
                   </item>
                   <item type="UncertainValue" >
                    <value type="float" >-3.1003324089476489e-18</value>
                    <uncertainty type="Uncertainty" >
                     <precision type="int" >1000000</precision>
                     <uncertainty type="int" >0</uncertainty>
                    </uncertainty>
                   </item>
                   <item type="UncertainValue" >
                    <value type="float" >0.006137304622944666</value>
                    <uncertainty type="Uncertainty" >
                     <precision type="int" >1000000</precision>
                     <uncertainty type="int" >0</uncertainty>
                    </uncertainty>
                   </item>
                   <item type="UncertainValue" >
                    <value type="float" >-3.1003324089476493e-18</value>
                    <uncertainty type="Uncertainty" >
                     <precision type="int" >1000000</precision>
                     <uncertainty type="int" >0</uncertainty>
                    </uncertainty>
                   </item>
                  </uvalues>
                  <type type="AtomicDisplacementParameters::Type" >
                   <enumerator type="int" >1</enumerator>
                  </type>
                  <u_equivalent type="float" >0.043999999999999997</u_equivalent>
                 </value>
                </adps>
               </value>
              </site>
              <annotations type="Annotations" >
               <annotations type="Container" >
                <count type="int" >1</count>
                <item type="Handle" >
                 <serial_number type="int" >77</serial_number>
                 <value type="FileOrdering" >
                  <value type="Handle" >
                   <serial_number type="int" >78</serial_number>
                   <value type="FileOrdering" >
                    <file_order type="int" >11</file_order>
                   </value>
                  </value>
                 </value>
                </item>
               </annotations>
              </annotations>
             </value>
            </item>
            <item type="Handle" >
             <serial_number type="int" >79</serial_number>
             <value type="Atom3d" >
              <element type="Element" >
               <code type="char" >2</code>
              </element>
              <formal_charge type="int" >0</formal_charge>
              <radius type="float" >0.23000000000000001</radius>
              <label type="string" >H3C</label>
              <site type="Handle" >
               <serial_number type="int" >80</serial_number>
               <value type="Site" >
                <orthogonal type="Point" >
                 <coordinates type="Vector" >
                  <vector type="Container" >
                   <count type="int" >3</count>
                   <item type="float" >-2.9402434960483319</item>
                   <item type="float" >0.50841479999999994</item>
                   <item type="float" >-1.26388733822669</item>
                  </vector>
                 </coordinates>
                </orthogonal>
                <fractional type="Point" >
                 <coordinates type="Vector" >
                  <vector type="Container" >
                   <count type="int" >3</count>
                   <item type="float" >-0.30209999999999998</item>
                   <item type="float" >0.070800000000000002</item>
                   <item type="float" >-0.053100000000000001</item>
                  </vector>
                 </coordinates>
                </fractional>
                <uncertain_value type="UncertainValue" >
                 <value type="float" >1</value>
                 <uncertainty type="Uncertainty" >
                  <precision type="int" >0</precision>
                  <uncertainty type="int" >0</uncertainty>
                 </uncertainty>
                </uncertain_value>
                <uncertainty type="Handle" >
                 <serial_number type="int" >81</serial_number>
                 <value type="Container" >
                  <count type="int" >3</count>
                  <item type="Uncertainty" >
                   <precision type="int" >4</precision>
                   <uncertainty type="int" >0</uncertainty>
                  </item>
                  <item type="Uncertainty" >
                   <precision type="int" >4</precision>
                   <uncertainty type="int" >0</uncertainty>
                  </item>
                  <item type="Uncertainty" >
                   <precision type="int" >4</precision>
                   <uncertainty type="int" >0</uncertainty>
                  </item>
                 </value>
                </uncertainty>
                <adps type="Handle" >
                 <serial_number type="int" >82</serial_number>
                 <value type="AtomicDisplacementParameters" >
                  <uvalues type="Container" >
                   <count type="int" >6</count>
                   <item type="UncertainValue" >
                    <value type="float" >0.043999999999999991</value>
                    <uncertainty type="Uncertainty" >
                     <precision type="int" >1000000</precision>
                     <uncertainty type="int" >0</uncertainty>
                    </uncertainty>
                   </item>
                   <item type="UncertainValue" >
                    <value type="float" >0.044000000000000011</value>
                    <uncertainty type="Uncertainty" >
                     <precision type="int" >1000000</precision>
                     <uncertainty type="int" >0</uncertainty>
                    </uncertainty>
                   </item>
                   <item type="UncertainValue" >
                    <value type="float" >0.043999999999999997</value>
                    <uncertainty type="Uncertainty" >
                     <precision type="int" >1000000</precision>
                     <uncertainty type="int" >0</uncertainty>
                    </uncertainty>
                   </item>
                   <item type="UncertainValue" >
                    <value type="float" >-3.1003324089476489e-18</value>
                    <uncertainty type="Uncertainty" >
                     <precision type="int" >1000000</precision>
                     <uncertainty type="int" >0</uncertainty>
                    </uncertainty>
                   </item>
                   <item type="UncertainValue" >
                    <value type="float" >0.006137304622944666</value>
                    <uncertainty type="Uncertainty" >
                     <precision type="int" >1000000</precision>
                     <uncertainty type="int" >0</uncertainty>
                    </uncertainty>
                   </item>
                   <item type="UncertainValue" >
                    <value type="float" >-3.1003324089476493e-18</value>
                    <uncertainty type="Uncertainty" >
                     <precision type="int" >1000000</precision>
                     <uncertainty type="int" >0</uncertainty>
                    </uncertainty>
                   </item>
                  </uvalues>
                  <type type="AtomicDisplacementParameters::Type" >
                   <enumerator type="int" >1</enumerator>
                  </type>
                  <u_equivalent type="float" >0.043999999999999997</u_equivalent>
                 </value>
                </adps>
               </value>
              </site>
              <annotations type="Annotations" >
               <annotations type="Container" >
                <count type="int" >1</count>
                <item type="Handle" >
                 <serial_number type="int" >83</serial_number>
                 <value type="FileOrdering" >
                  <value type="Handle" >
                   <serial_number type="int" >84</serial_number>
                   <value type="FileOrdering" >
                    <file_order type="int" >12</file_order>
                   </value>
                  </value>
                 </value>
                </item>
               </annotations>
              </annotations>
             </value>
            </item>
            <item type="Handle" >
             <serial_number type="int" >85</serial_number>
             <value type="Atom3d" >
              <element type="Element" >
               <code type="char" >1</code>
              </element>
              <formal_charge type="int" >0</formal_charge>
              <radius type="float" >0.68000000000000005</radius>
              <label type="string" >C4</label>
              <site type="Handle" >
               <serial_number type="int" >86</serial_number>
               <value type="Site" >
                <orthogonal type="Point" >
                 <coordinates type="Vector" >
                  <vector type="Container" >
                   <count type="int" >3</count>
                   <item type="float" >-2.7408460663474115</item>
                   <item type="float" >-0.22404719999999986</item>
                   <item type="float" >2.0843430171094397</item>
                  </vector>
                 </coordinates>
                </orthogonal>
                <fractional type="Point" >
                 <coordinates type="Vector" >
                  <vector type="Container" >
                   <count type="int" >3</count>
                   <item type="float" >-0.23709</item>
                   <item type="float" >-0.031199999999999999</item>
                   <item type="float" >0.087569999999999995</item>
                  </vector>
                 </coordinates>
                </fractional>
                <uncertain_value type="UncertainValue" >
                 <value type="float" >1</value>
                 <uncertainty type="Uncertainty" >
                  <precision type="int" >0</precision>
                  <uncertainty type="int" >0</uncertainty>
                 </uncertainty>
                </uncertain_value>
                <uncertainty type="Handle" >
                 <serial_number type="int" >87</serial_number>
                 <value type="Container" >
                  <count type="int" >3</count>
                  <item type="Uncertainty" >
                   <precision type="int" >5</precision>
                   <uncertainty type="int" >14</uncertainty>
                  </item>
                  <item type="Uncertainty" >
                   <precision type="int" >4</precision>
                   <uncertainty type="int" >2</uncertainty>
                  </item>
                  <item type="Uncertainty" >
                   <precision type="int" >5</precision>
                   <uncertainty type="int" >6</uncertainty>
                  </item>
                 </value>
                </uncertainty>
                <adps type="Handle" >
                 <serial_number type="int" >88</serial_number>
                 <value type="AtomicDisplacementParameters" >
                  <uvalues type="Container" >
                   <count type="int" >6</count>
                   <item type="UncertainValue" >
                    <value type="float" >0.027699999999999999</value>
                    <uncertainty type="Uncertainty" >
                     <precision type="int" >4</precision>
                     <uncertainty type="int" >8</uncertainty>
                    </uncertainty>
                   </item>
                   <item type="UncertainValue" >
                    <value type="float" >0.026599999999999999</value>
                    <uncertainty type="Uncertainty" >
                     <precision type="int" >4</precision>
                     <uncertainty type="int" >7</uncertainty>
                    </uncertainty>
                   </item>
                   <item type="UncertainValue" >
                    <value type="float" >0.024500000000000001</value>
                    <uncertainty type="Uncertainty" >
                     <precision type="int" >4</precision>
                     <uncertainty type="int" >7</uncertainty>
                    </uncertainty>
                   </item>
                   <item type="UncertainValue" >
                    <value type="float" >-0.0028999999999999998</value>
                    <uncertainty type="Uncertainty" >
                     <precision type="int" >4</precision>
                     <uncertainty type="int" >6</uncertainty>
                    </uncertainty>
                   </item>
                   <item type="UncertainValue" >
                    <value type="float" >0.0035000000000000001</value>
                    <uncertainty type="Uncertainty" >
                     <precision type="int" >4</precision>
                     <uncertainty type="int" >6</uncertainty>
                    </uncertainty>
                   </item>
                   <item type="UncertainValue" >
                    <value type="float" >0</value>
                    <uncertainty type="Uncertainty" >
                     <precision type="int" >4</precision>
                     <uncertainty type="int" >6</uncertainty>
                    </uncertainty>
                   </item>
                  </uvalues>
                  <type type="AtomicDisplacementParameters::Type" >
                   <enumerator type="int" >0</enumerator>
                  </type>
                  <u_equivalent type="float" >0.02627999447864347</u_equivalent>
                 </value>
                </adps>
               </value>
              </site>
              <annotations type="Annotations" >
               <annotations type="Container" >
                <count type="int" >1</count>
                <item type="Handle" >
                 <serial_number type="int" >89</serial_number>
                 <value type="FileOrdering" >
                  <value type="Handle" >
                   <serial_number type="int" >90</serial_number>
                   <value type="FileOrdering" >
                    <file_order type="int" >13</file_order>
                   </value>
                  </value>
                 </value>
                </item>
               </annotations>
              </annotations>
             </value>
            </item>
            <item type="Handle" >
             <serial_number type="int" >91</serial_number>
             <value type="Atom3d" >
              <element type="Element" >
               <code type="char" >1</code>
              </element>
              <formal_charge type="int" >0</formal_charge>
              <radius type="float" >0.68000000000000005</radius>
              <label type="string" >C5</label>
              <site type="Handle" >
               <serial_number type="int" >92</serial_number>
               <value type="Site" >
                <orthogonal type="Point" >
                 <coordinates type="Vector" >
                  <vector type="Container" >
                   <count type="int" >3</count>
                   <item type="float" >-2.4250793531455597</item>
                   <item type="float" >-1.7026150999999998</item>
                   <item type="float" >1.837278034608629</item>
                  </vector>
                 </coordinates>
                </orthogonal>
                <fractional type="Point" >
                 <coordinates type="Vector" >
                  <vector type="Container" >
                   <count type="int" >3</count>
                   <item type="float" >-0.20987</item>
                   <item type="float" >-0.23710000000000001</item>
                   <item type="float" >0.077189999999999995</item>
                  </vector>
                 </coordinates>
                </fractional>
                <uncertain_value type="UncertainValue" >
                 <value type="float" >1</value>
                 <uncertainty type="Uncertainty" >
                  <precision type="int" >0</precision>
                  <uncertainty type="int" >0</uncertainty>
                 </uncertainty>
                </uncertain_value>
                <uncertainty type="Handle" >
                 <serial_number type="int" >93</serial_number>
                 <value type="Container" >
                  <count type="int" >3</count>
                  <item type="Uncertainty" >
                   <precision type="int" >5</precision>
                   <uncertainty type="int" >16</uncertainty>
                  </item>
                  <item type="Uncertainty" >
                   <precision type="int" >4</precision>
                   <uncertainty type="int" >2</uncertainty>
                  </item>
                  <item type="Uncertainty" >
                   <precision type="int" >5</precision>
                   <uncertainty type="int" >7</uncertainty>
                  </item>
                 </value>
                </uncertainty>
                <adps type="Handle" >
                 <serial_number type="int" >94</serial_number>
                 <value type="AtomicDisplacementParameters" >
                  <uvalues type="Container" >
                   <count type="int" >6</count>
                   <item type="UncertainValue" >
                    <value type="float" >0.0373</value>
                    <uncertainty type="Uncertainty" >
                     <precision type="int" >4</precision>
                     <uncertainty type="int" >9</uncertainty>
                    </uncertainty>
                   </item>
                   <item type="UncertainValue" >
                    <value type="float" >0.025499999999999998</value>
                    <uncertainty type="Uncertainty" >
                     <precision type="int" >4</precision>
                     <uncertainty type="int" >8</uncertainty>
                    </uncertainty>
                   </item>
                   <item type="UncertainValue" >
                    <value type="float" >0.033300000000000003</value>
                    <uncertainty type="Uncertainty" >
                     <precision type="int" >4</precision>
                     <uncertainty type="int" >8</uncertainty>
                    </uncertainty>
                   </item>
                   <item type="UncertainValue" >
                    <value type="float" >-0.002</value>
                    <uncertainty type="Uncertainty" >
                     <precision type="int" >4</precision>
                     <uncertainty type="int" >6</uncertainty>
                    </uncertainty>
                   </item>
                   <item type="UncertainValue" >
                    <value type="float" >0.0033999999999999998</value>
                    <uncertainty type="Uncertainty" >
                     <precision type="int" >4</precision>
                     <uncertainty type="int" >7</uncertainty>
                    </uncertainty>
                   </item>
                   <item type="UncertainValue" >
                    <value type="float" >0.0030000000000000001</value>
                    <uncertainty type="Uncertainty" >
                     <precision type="int" >4</precision>
                     <uncertainty type="int" >6</uncertainty>
                    </uncertainty>
                   </item>
                  </uvalues>
                  <type type="AtomicDisplacementParameters::Type" >
                   <enumerator type="int" >0</enumerator>
                  </type>
                  <u_equivalent type="float" >0.032177841472982555</u_equivalent>
                 </value>
                </adps>
               </value>
              </site>
              <annotations type="Annotations" >
               <annotations type="Container" >
                <count type="int" >1</count>
                <item type="Handle" >
                 <serial_number type="int" >95</serial_number>
                 <value type="FileOrdering" >
                  <value type="Handle" >
                   <serial_number type="int" >96</serial_number>
                   <value type="FileOrdering" >
                    <file_order type="int" >14</file_order>
                   </value>
                  </value>
                 </value>
                </item>
               </annotations>
              </annotations>
             </value>
            </item>
            <item type="Handle" >
             <serial_number type="int" >97</serial_number>
             <value type="Atom3d" >
              <element type="Element" >
               <code type="char" >2</code>
              </element>
              <formal_charge type="int" >0</formal_charge>
              <radius type="float" >0.23000000000000001</radius>
              <label type="string" >H5A</label>
              <site type="Handle" >
               <serial_number type="int" >98</serial_number>
               <value type="Site" >
                <orthogonal type="Point" >
                 <coordinates type="Vector" >
                  <vector type="Container" >
                   <count type="int" >3</count>
                   <item type="float" >-1.6164787637322107</item>
                   <item type="float" >-1.7765794000000001</item>
                   <item type="float" >1.290069561805774</item>
                  </vector>
                 </coordinates>
                </orthogonal>
                <fractional type="Point" >
                 <coordinates type="Vector" >
                  <vector type="Container" >
                   <count type="int" >3</count>
                   <item type="float" >-0.13900000000000001</item>
                   <item type="float" >-0.24740000000000001</item>
                   <item type="float" >0.054199999999999998</item>
                  </vector>
                 </coordinates>
                </fractional>
                <uncertain_value type="UncertainValue" >
                 <value type="float" >1</value>
                 <uncertainty type="Uncertainty" >
                  <precision type="int" >0</precision>
                  <uncertainty type="int" >0</uncertainty>
                 </uncertainty>
                </uncertain_value>
                <uncertainty type="Handle" >
                 <serial_number type="int" >99</serial_number>
                 <value type="Container" >
                  <count type="int" >3</count>
                  <item type="Uncertainty" >
                   <precision type="int" >4</precision>
                   <uncertainty type="int" >0</uncertainty>
                  </item>
                  <item type="Uncertainty" >
                   <precision type="int" >4</precision>
                   <uncertainty type="int" >0</uncertainty>
                  </item>
                  <item type="Uncertainty" >
                   <precision type="int" >4</precision>
                   <uncertainty type="int" >0</uncertainty>
                  </item>
                 </value>
                </uncertainty>
                <adps type="Handle" >
                 <serial_number type="int" >100</serial_number>
                 <value type="AtomicDisplacementParameters" >
                  <uvalues type="Container" >
                   <count type="int" >6</count>
                   <item type="UncertainValue" >
                    <value type="float" >0.047999999999999987</value>
                    <uncertainty type="Uncertainty" >
                     <precision type="int" >1000000</precision>
                     <uncertainty type="int" >0</uncertainty>
                    </uncertainty>
                   </item>
                   <item type="UncertainValue" >
                    <value type="float" >0.048000000000000001</value>
                    <uncertainty type="Uncertainty" >
                     <precision type="int" >1000000</precision>
                     <uncertainty type="int" >0</uncertainty>
                    </uncertainty>
                   </item>
                   <item type="UncertainValue" >
                    <value type="float" >0.048000000000000001</value>
                    <uncertainty type="Uncertainty" >
                     <precision type="int" >1000000</precision>
                     <uncertainty type="int" >0</uncertainty>
                    </uncertainty>
                   </item>
                   <item type="UncertainValue" >
                    <value type="float" >-3.3821808097610717e-18</value>
                    <uncertainty type="Uncertainty" >
                     <precision type="int" >1000000</precision>
                     <uncertainty type="int" >0</uncertainty>
                    </uncertainty>
                   </item>
                   <item type="UncertainValue" >
                    <value type="float" >0.0066952414068487259</value>
                    <uncertainty type="Uncertainty" >
                     <precision type="int" >1000000</precision>
                     <uncertainty type="int" >0</uncertainty>
                    </uncertainty>
                   </item>
                   <item type="UncertainValue" >
                    <value type="float" >-3.3821808097610721e-18</value>
                    <uncertainty type="Uncertainty" >
                     <precision type="int" >1000000</precision>
                     <uncertainty type="int" >0</uncertainty>
                    </uncertainty>
                   </item>
                  </uvalues>
                  <type type="AtomicDisplacementParameters::Type" >
                   <enumerator type="int" >1</enumerator>
                  </type>
                  <u_equivalent type="float" >0.048000000000000001</u_equivalent>
                 </value>
                </adps>
               </value>
              </site>
              <annotations type="Annotations" >
               <annotations type="Container" >
                <count type="int" >1</count>
                <item type="Handle" >
                 <serial_number type="int" >101</serial_number>
                 <value type="FileOrdering" >
                  <value type="Handle" >
                   <serial_number type="int" >102</serial_number>
                   <value type="FileOrdering" >
                    <file_order type="int" >15</file_order>
                   </value>
                  </value>
                 </value>
                </item>
               </annotations>
              </annotations>
             </value>
            </item>
            <item type="Handle" >
             <serial_number type="int" >103</serial_number>
             <value type="Atom3d" >
              <element type="Element" >
               <code type="char" >2</code>
              </element>
              <formal_charge type="int" >0</formal_charge>
              <radius type="float" >0.23000000000000001</radius>
              <label type="string" >H5B</label>
              <site type="Handle" >
               <serial_number type="int" >104</serial_number>
               <value type="Site" >
                <orthogonal type="Point" >
                 <coordinates type="Vector" >
                  <vector type="Container" >
                   <count type="int" >3</count>
                   <item type="float" >-3.1758429430738397</item>
                   <item type="float" >-2.1234217000000002</item>
                   <item type="float" >1.368616232543026</item>
                  </vector>
                 </coordinates>
                </orthogonal>
                <fractional type="Point" >
                 <coordinates type="Vector" >
                  <vector type="Container" >
                   <count type="int" >3</count>
                   <item type="float" >-0.28899999999999998</item>
                   <item type="float" >-0.29570000000000002</item>
                   <item type="float" >0.057500000000000002</item>
                  </vector>
                 </coordinates>
                </fractional>
                <uncertain_value type="UncertainValue" >
                 <value type="float" >1</value>
                 <uncertainty type="Uncertainty" >
                  <precision type="int" >0</precision>
                  <uncertainty type="int" >0</uncertainty>
                 </uncertainty>
                </uncertain_value>
                <uncertainty type="Handle" >
                 <serial_number type="int" >105</serial_number>
                 <value type="Container" >
                  <count type="int" >3</count>
                  <item type="Uncertainty" >
                   <precision type="int" >4</precision>
                   <uncertainty type="int" >0</uncertainty>
                  </item>
                  <item type="Uncertainty" >
                   <precision type="int" >4</precision>
                   <uncertainty type="int" >0</uncertainty>
                  </item>
                  <item type="Uncertainty" >
                   <precision type="int" >4</precision>
                   <uncertainty type="int" >0</uncertainty>
                  </item>
                 </value>
                </uncertainty>
                <adps type="Handle" >
                 <serial_number type="int" >106</serial_number>
                 <value type="AtomicDisplacementParameters" >
                  <uvalues type="Container" >
                   <count type="int" >6</count>
                   <item type="UncertainValue" >
                    <value type="float" >0.047999999999999987</value>
                    <uncertainty type="Uncertainty" >
                     <precision type="int" >1000000</precision>
                     <uncertainty type="int" >0</uncertainty>
                    </uncertainty>
                   </item>
                   <item type="UncertainValue" >
                    <value type="float" >0.048000000000000001</value>
                    <uncertainty type="Uncertainty" >
                     <precision type="int" >1000000</precision>
                     <uncertainty type="int" >0</uncertainty>
                    </uncertainty>
                   </item>
                   <item type="UncertainValue" >
                    <value type="float" >0.048000000000000001</value>
                    <uncertainty type="Uncertainty" >
                     <precision type="int" >1000000</precision>
                     <uncertainty type="int" >0</uncertainty>
                    </uncertainty>
                   </item>
                   <item type="UncertainValue" >
                    <value type="float" >-3.3821808097610717e-18</value>
                    <uncertainty type="Uncertainty" >
                     <precision type="int" >1000000</precision>
                     <uncertainty type="int" >0</uncertainty>
                    </uncertainty>
                   </item>
                   <item type="UncertainValue" >
                    <value type="float" >0.0066952414068487259</value>
                    <uncertainty type="Uncertainty" >
                     <precision type="int" >1000000</precision>
                     <uncertainty type="int" >0</uncertainty>
                    </uncertainty>
                   </item>
                   <item type="UncertainValue" >
                    <value type="float" >-3.3821808097610721e-18</value>
                    <uncertainty type="Uncertainty" >
                     <precision type="int" >1000000</precision>
                     <uncertainty type="int" >0</uncertainty>
                    </uncertainty>
                   </item>
                  </uvalues>
                  <type type="AtomicDisplacementParameters::Type" >
                   <enumerator type="int" >1</enumerator>
                  </type>
                  <u_equivalent type="float" >0.048000000000000001</u_equivalent>
                 </value>
                </adps>
               </value>
              </site>
              <annotations type="Annotations" >
               <annotations type="Container" >
                <count type="int" >1</count>
                <item type="Handle" >
                 <serial_number type="int" >107</serial_number>
                 <value type="FileOrdering" >
                  <value type="Handle" >
                   <serial_number type="int" >108</serial_number>
                   <value type="FileOrdering" >
                    <file_order type="int" >16</file_order>
                   </value>
                  </value>
                 </value>
                </item>
               </annotations>
              </annotations>
             </value>
            </item>
            <item type="Handle" >
             <serial_number type="int" >109</serial_number>
             <value type="Atom3d" >
              <element type="Element" >
               <code type="char" >2</code>
              </element>
              <formal_charge type="int" >0</formal_charge>
              <radius type="float" >0.23000000000000001</radius>
              <label type="string" >H5C</label>
              <site type="Handle" >
               <serial_number type="int" >110</serial_number>
               <value type="Site" >
                <orthogonal type="Point" >
                 <coordinates type="Vector" >
                  <vector type="Container" >
                   <count type="int" >3</count>
                   <item type="float" >-2.2808472792340639</item>
                   <item type="float" >-2.1535818999999998</item>
                   <item type="float" >2.6943888265020961</item>
                  </vector>
                 </coordinates>
                </orthogonal>
                <fractional type="Point" >
                 <coordinates type="Vector" >
                  <vector type="Container" >
                   <count type="int" >3</count>
                   <item type="float" >-0.1842</item>
                   <item type="float" >-0.2999</item>
                   <item type="float" >0.1132</item>
                  </vector>
                 </coordinates>
                </fractional>
                <uncertain_value type="UncertainValue" >
                 <value type="float" >1</value>
                 <uncertainty type="Uncertainty" >
                  <precision type="int" >0</precision>
                  <uncertainty type="int" >0</uncertainty>
                 </uncertainty>
                </uncertain_value>
                <uncertainty type="Handle" >
                 <serial_number type="int" >111</serial_number>
                 <value type="Container" >
                  <count type="int" >3</count>
                  <item type="Uncertainty" >
                   <precision type="int" >4</precision>
                   <uncertainty type="int" >0</uncertainty>
                  </item>
                  <item type="Uncertainty" >
                   <precision type="int" >4</precision>
                   <uncertainty type="int" >0</uncertainty>
                  </item>
                  <item type="Uncertainty" >
                   <precision type="int" >4</precision>
                   <uncertainty type="int" >0</uncertainty>
                  </item>
                 </value>
                </uncertainty>
                <adps type="Handle" >
                 <serial_number type="int" >112</serial_number>
                 <value type="AtomicDisplacementParameters" >
                  <uvalues type="Container" >
                   <count type="int" >6</count>
                   <item type="UncertainValue" >
                    <value type="float" >0.047999999999999987</value>
                    <uncertainty type="Uncertainty" >
                     <precision type="int" >1000000</precision>
                     <uncertainty type="int" >0</uncertainty>
                    </uncertainty>
                   </item>
                   <item type="UncertainValue" >
                    <value type="float" >0.048000000000000001</value>
                    <uncertainty type="Uncertainty" >
                     <precision type="int" >1000000</precision>
                     <uncertainty type="int" >0</uncertainty>
                    </uncertainty>
                   </item>
                   <item type="UncertainValue" >
                    <value type="float" >0.048000000000000001</value>
                    <uncertainty type="Uncertainty" >
                     <precision type="int" >1000000</precision>
                     <uncertainty type="int" >0</uncertainty>
                    </uncertainty>
                   </item>
                   <item type="UncertainValue" >
                    <value type="float" >-3.3821808097610717e-18</value>
                    <uncertainty type="Uncertainty" >
                     <precision type="int" >1000000</precision>
                     <uncertainty type="int" >0</uncertainty>
                    </uncertainty>
                   </item>
                   <item type="UncertainValue" >
                    <value type="float" >0.0066952414068487259</value>
                    <uncertainty type="Uncertainty" >
                     <precision type="int" >1000000</precision>
                     <uncertainty type="int" >0</uncertainty>
                    </uncertainty>
                   </item>
                   <item type="UncertainValue" >
                    <value type="float" >-3.3821808097610721e-18</value>
                    <uncertainty type="Uncertainty" >
                     <precision type="int" >1000000</precision>
                     <uncertainty type="int" >0</uncertainty>
                    </uncertainty>
                   </item>
                  </uvalues>
                  <type type="AtomicDisplacementParameters::Type" >
                   <enumerator type="int" >1</enumerator>
                  </type>
                  <u_equivalent type="float" >0.048000000000000001</u_equivalent>
                 </value>
                </adps>
               </value>
              </site>
              <annotations type="Annotations" >
               <annotations type="Container" >
                <count type="int" >1</count>
                <item type="Handle" >
                 <serial_number type="int" >113</serial_number>
                 <value type="FileOrdering" >
                  <value type="Handle" >
                   <serial_number type="int" >114</serial_number>
                   <value type="FileOrdering" >
                    <file_order type="int" >17</file_order>
                   </value>
                  </value>
                 </value>
                </item>
               </annotations>
              </annotations>
             </value>
            </item>
            <item type="Handle" >
             <serial_number type="int" >115</serial_number>
             <value type="Atom3d" >
              <element type="Element" >
               <code type="char" >1</code>
              </element>
              <formal_charge type="int" >0</formal_charge>
              <radius type="float" >0.68000000000000005</radius>
              <label type="string" >C6</label>
              <site type="Handle" >
               <serial_number type="int" >116</serial_number>
               <value type="Site" >
                <orthogonal type="Point" >
                 <coordinates type="Vector" >
                  <vector type="Container" >
                   <count type="int" >3</count>
                   <item type="float" >-4.0428749395277492</item>
                   <item type="float" >-0.09478919999999981</item>
                   <item type="float" >2.8545764307632191</item>
                  </vector>
                 </coordinates>
                </orthogonal>
                <fractional type="Point" >
                 <coordinates type="Vector" >
                  <vector type="Container" >
                   <count type="int" >3</count>
                   <item type="float" >-0.35271999999999998</item>
                   <item type="float" >-0.0132</item>
                   <item type="float" >0.11992999999999999</item>
                  </vector>
                 </coordinates>
                </fractional>
                <uncertain_value type="UncertainValue" >
                 <value type="float" >1</value>
                 <uncertainty type="Uncertainty" >
                  <precision type="int" >0</precision>
                  <uncertainty type="int" >0</uncertainty>
                 </uncertainty>
                </uncertain_value>
                <uncertainty type="Handle" >
                 <serial_number type="int" >117</serial_number>
                 <value type="Container" >
                  <count type="int" >3</count>
                  <item type="Uncertainty" >
                   <precision type="int" >5</precision>
                   <uncertainty type="int" >15</uncertainty>
                  </item>
                  <item type="Uncertainty" >
                   <precision type="int" >4</precision>
                   <uncertainty type="int" >2</uncertainty>
                  </item>
                  <item type="Uncertainty" >
                   <precision type="int" >5</precision>
                   <uncertainty type="int" >6</uncertainty>
                  </item>
                 </value>
                </uncertainty>
                <adps type="Handle" >
                 <serial_number type="int" >118</serial_number>
                 <value type="AtomicDisplacementParameters" >
                  <uvalues type="Container" >
                   <count type="int" >6</count>
                   <item type="UncertainValue" >
                    <value type="float" >0.0315</value>
                    <uncertainty type="Uncertainty" >
                     <precision type="int" >4</precision>
                     <uncertainty type="int" >9</uncertainty>
                    </uncertainty>
                   </item>
                   <item type="UncertainValue" >
                    <value type="float" >0.041000000000000002</value>
                    <uncertainty type="Uncertainty" >
                     <precision type="int" >4</precision>
                     <uncertainty type="int" >9</uncertainty>
                    </uncertainty>
                   </item>
                   <item type="UncertainValue" >
                    <value type="float" >0.0287</value>
                    <uncertainty type="Uncertainty" >
                     <precision type="int" >4</precision>
                     <uncertainty type="int" >8</uncertainty>
                    </uncertainty>
                   </item>
                   <item type="UncertainValue" >
                    <value type="float" >-0.0023</value>
                    <uncertainty type="Uncertainty" >
                     <precision type="int" >4</precision>
                     <uncertainty type="int" >7</uncertainty>
                    </uncertainty>
                   </item>
                   <item type="UncertainValue" >
                    <value type="float" >0.0067000000000000002</value>
                    <uncertainty type="Uncertainty" >
                     <precision type="int" >4</precision>
                     <uncertainty type="int" >7</uncertainty>
                    </uncertainty>
                   </item>
                   <item type="UncertainValue" >
                    <value type="float" >0.0023999999999999998</value>
                    <uncertainty type="Uncertainty" >
                     <precision type="int" >4</precision>
                     <uncertainty type="int" >7</uncertainty>
                    </uncertainty>
                   </item>
                  </uvalues>
                  <type type="AtomicDisplacementParameters::Type" >
                   <enumerator type="int" >0</enumerator>
                  </type>
                  <u_equivalent type="float" >0.033496102269400946</u_equivalent>
                 </value>
                </adps>
               </value>
              </site>
              <annotations type="Annotations" >
               <annotations type="Container" >
                <count type="int" >1</count>
                <item type="Handle" >
                 <serial_number type="int" >119</serial_number>
                 <value type="FileOrdering" >
                  <value type="Handle" >
                   <serial_number type="int" >120</serial_number>
                   <value type="FileOrdering" >
                    <file_order type="int" >18</file_order>
                   </value>
                  </value>
                 </value>
                </item>
               </annotations>
              </annotations>
             </value>
            </item>
            <item type="Handle" >
             <serial_number type="int" >121</serial_number>
             <value type="Atom3d" >
              <element type="Element" >
               <code type="char" >2</code>
              </element>
              <formal_charge type="int" >0</formal_charge>
              <radius type="float" >0.23000000000000001</radius>
              <label type="string" >H6A</label>
              <site type="Handle" >
               <serial_number type="int" >122</serial_number>
               <value type="Site" >
                <orthogonal type="Point" >
                 <coordinates type="Vector" >
                  <vector type="Container" >
                   <count type="int" >3</count>
                   <item type="float" >-3.9892933600853606</item>
                   <item type="float" >-0.62474699999999972</item>
                   <item type="float" >3.6774123117895217</item>
                  </vector>
                 </coordinates>
                </orthogonal>
                <fractional type="Point" >
                 <coordinates type="Vector" >
                  <vector type="Container" >
                   <count type="int" >3</count>
                   <item type="float" >-0.33629999999999999</item>
                   <item type="float" >-0.086999999999999994</item>
                   <item type="float" >0.1545</item>
                  </vector>
                 </coordinates>
                </fractional>
                <uncertain_value type="UncertainValue" >
                 <value type="float" >1</value>
                 <uncertainty type="Uncertainty" >
                  <precision type="int" >0</precision>
                  <uncertainty type="int" >0</uncertainty>
                 </uncertainty>
                </uncertain_value>
                <uncertainty type="Handle" >
                 <serial_number type="int" >123</serial_number>
                 <value type="Container" >
                  <count type="int" >3</count>
                  <item type="Uncertainty" >
                   <precision type="int" >4</precision>
                   <uncertainty type="int" >0</uncertainty>
                  </item>
                  <item type="Uncertainty" >
                   <precision type="int" >4</precision>
                   <uncertainty type="int" >0</uncertainty>
                  </item>
                  <item type="Uncertainty" >
                   <precision type="int" >4</precision>
                   <uncertainty type="int" >0</uncertainty>
                  </item>
                 </value>
                </uncertainty>
                <adps type="Handle" >
                 <serial_number type="int" >124</serial_number>
                 <value type="AtomicDisplacementParameters" >
                  <uvalues type="Container" >
                   <count type="int" >6</count>
                   <item type="UncertainValue" >
                    <value type="float" >0.049999999999999996</value>
                    <uncertainty type="Uncertainty" >
                     <precision type="int" >1000000</precision>
                     <uncertainty type="int" >0</uncertainty>
                    </uncertainty>
                   </item>
                   <item type="UncertainValue" >
                    <value type="float" >0.050000000000000017</value>
                    <uncertainty type="Uncertainty" >
                     <precision type="int" >1000000</precision>
                     <uncertainty type="int" >0</uncertainty>
                    </uncertainty>
                   </item>
                   <item type="UncertainValue" >
                    <value type="float" >0.05000000000000001</value>
                    <uncertainty type="Uncertainty" >
                     <precision type="int" >1000000</precision>
                     <uncertainty type="int" >0</uncertainty>
                    </uncertainty>
                   </item>
                   <item type="UncertainValue" >
                    <value type="float" >-3.5231050101677831e-18</value>
                    <uncertainty type="Uncertainty" >
                     <precision type="int" >1000000</precision>
                     <uncertainty type="int" >0</uncertainty>
                    </uncertainty>
                   </item>
                   <item type="UncertainValue" >
                    <value type="float" >0.0069742097988007568</value>
                    <uncertainty type="Uncertainty" >
                     <precision type="int" >1000000</precision>
                     <uncertainty type="int" >0</uncertainty>
                    </uncertainty>
                   </item>
                   <item type="UncertainValue" >
                    <value type="float" >-3.5231050101677831e-18</value>
                    <uncertainty type="Uncertainty" >
                     <precision type="int" >1000000</precision>
                     <uncertainty type="int" >0</uncertainty>
                    </uncertainty>
                   </item>
                  </uvalues>
                  <type type="AtomicDisplacementParameters::Type" >
                   <enumerator type="int" >1</enumerator>
                  </type>
                  <u_equivalent type="float" >0.050000000000000003</u_equivalent>
                 </value>
                </adps>
               </value>
              </site>
              <annotations type="Annotations" >
               <annotations type="Container" >
                <count type="int" >1</count>
                <item type="Handle" >
                 <serial_number type="int" >125</serial_number>
                 <value type="FileOrdering" >
                  <value type="Handle" >
                   <serial_number type="int" >126</serial_number>
                   <value type="FileOrdering" >
                    <file_order type="int" >19</file_order>
                   </value>
                  </value>
                 </value>
                </item>
               </annotations>
              </annotations>
             </value>
            </item>
            <item type="Handle" >
             <serial_number type="int" >127</serial_number>
             <value type="Atom3d" >
              <element type="Element" >
               <code type="char" >2</code>
              </element>
              <formal_charge type="int" >0</formal_charge>
              <radius type="float" >0.23000000000000001</radius>
              <label type="string" >H6B</label>
              <site type="Handle" >
               <serial_number type="int" >128</serial_number>
               <value type="Site" >
                <orthogonal type="Point" >
                 <coordinates type="Vector" >
                  <vector type="Container" >
                   <count type="int" >3</count>
                   <item type="float" >-4.7833179825259187</item>
                   <item type="float" >-0.42367899999999981</item>
                   <item type="float" >2.3016554728158365</item>
                  </vector>
                 </coordinates>
                </orthogonal>
                <fractional type="Point" >
                 <coordinates type="Vector" >
                  <vector type="Container" >
                   <count type="int" >3</count>
                   <item type="float" >-0.432</item>
                   <item type="float" >-0.058999999999999997</item>
                   <item type="float" >0.096699999999999994</item>
                  </vector>
                 </coordinates>
                </fractional>
                <uncertain_value type="UncertainValue" >
                 <value type="float" >1</value>
                 <uncertainty type="Uncertainty" >
                  <precision type="int" >0</precision>
                  <uncertainty type="int" >0</uncertainty>
                 </uncertainty>
                </uncertain_value>
                <uncertainty type="Handle" >
                 <serial_number type="int" >129</serial_number>
                 <value type="Container" >
                  <count type="int" >3</count>
                  <item type="Uncertainty" >
                   <precision type="int" >4</precision>
                   <uncertainty type="int" >0</uncertainty>
                  </item>
                  <item type="Uncertainty" >
                   <precision type="int" >4</precision>
                   <uncertainty type="int" >0</uncertainty>
                  </item>
                  <item type="Uncertainty" >
                   <precision type="int" >4</precision>
                   <uncertainty type="int" >0</uncertainty>
                  </item>
                 </value>
                </uncertainty>
                <adps type="Handle" >
                 <serial_number type="int" >130</serial_number>
                 <value type="AtomicDisplacementParameters" >
                  <uvalues type="Container" >
                   <count type="int" >6</count>
                   <item type="UncertainValue" >
                    <value type="float" >0.049999999999999996</value>
                    <uncertainty type="Uncertainty" >
                     <precision type="int" >1000000</precision>
                     <uncertainty type="int" >0</uncertainty>
                    </uncertainty>
                   </item>
                   <item type="UncertainValue" >
                    <value type="float" >0.050000000000000017</value>
                    <uncertainty type="Uncertainty" >
                     <precision type="int" >1000000</precision>
                     <uncertainty type="int" >0</uncertainty>
                    </uncertainty>
                   </item>
                   <item type="UncertainValue" >
                    <value type="float" >0.05000000000000001</value>
                    <uncertainty type="Uncertainty" >
                     <precision type="int" >1000000</precision>
                     <uncertainty type="int" >0</uncertainty>
                    </uncertainty>
                   </item>
                   <item type="UncertainValue" >
                    <value type="float" >-3.5231050101677831e-18</value>
                    <uncertainty type="Uncertainty" >
                     <precision type="int" >1000000</precision>
                     <uncertainty type="int" >0</uncertainty>
                    </uncertainty>
                   </item>
                   <item type="UncertainValue" >
                    <value type="float" >0.0069742097988007568</value>
                    <uncertainty type="Uncertainty" >
                     <precision type="int" >1000000</precision>
                     <uncertainty type="int" >0</uncertainty>
                    </uncertainty>
                   </item>
                   <item type="UncertainValue" >
                    <value type="float" >-3.5231050101677831e-18</value>
                    <uncertainty type="Uncertainty" >
                     <precision type="int" >1000000</precision>
                     <uncertainty type="int" >0</uncertainty>
                    </uncertainty>
                   </item>
                  </uvalues>
                  <type type="AtomicDisplacementParameters::Type" >
                   <enumerator type="int" >1</enumerator>
                  </type>
                  <u_equivalent type="float" >0.050000000000000003</u_equivalent>
                 </value>
                </adps>
               </value>
              </site>
              <annotations type="Annotations" >
               <annotations type="Container" >
                <count type="int" >1</count>
                <item type="Handle" >
                 <serial_number type="int" >131</serial_number>
                 <value type="FileOrdering" >
                  <value type="Handle" >
                   <serial_number type="int" >132</serial_number>
                   <value type="FileOrdering" >
                    <file_order type="int" >20</file_order>
                   </value>
                  </value>
                 </value>
                </item>
               </annotations>
              </annotations>
             </value>
            </item>
            <item type="Handle" >
             <serial_number type="int" >133</serial_number>
             <value type="Atom3d" >
              <element type="Element" >
               <code type="char" >2</code>
              </element>
              <formal_charge type="int" >0</formal_charge>
              <radius type="float" >0.23000000000000001</radius>
              <label type="string" >H6C</label>
              <site type="Handle" >
               <serial_number type="int" >134</serial_number>
               <value type="Site" >
                <orthogonal type="Point" >
                 <coordinates type="Vector" >
                  <vector type="Container" >
                   <count type="int" >3</count>
                   <item type="float" >-4.196218941456606</item>
                   <item type="float" >0.84592180000000028</item>
                   <item type="float" >3.0799815737576965</item>
                  </vector>
                 </coordinates>
                </orthogonal>
                <fractional type="Point" >
                 <coordinates type="Vector" >
                  <vector type="Container" >
                   <count type="int" >3</count>
                   <item type="float" >-0.36449999999999999</item>
                   <item type="float" >0.1178</item>
                   <item type="float" >0.12939999999999999</item>
                  </vector>
                 </coordinates>
                </fractional>
                <uncertain_value type="UncertainValue" >
                 <value type="float" >1</value>
                 <uncertainty type="Uncertainty" >
                  <precision type="int" >0</precision>
                  <uncertainty type="int" >0</uncertainty>
                 </uncertainty>
                </uncertain_value>
                <uncertainty type="Handle" >
                 <serial_number type="int" >135</serial_number>
                 <value type="Container" >
                  <count type="int" >3</count>
                  <item type="Uncertainty" >
                   <precision type="int" >4</precision>
                   <uncertainty type="int" >0</uncertainty>
                  </item>
                  <item type="Uncertainty" >
                   <precision type="int" >4</precision>
                   <uncertainty type="int" >0</uncertainty>
                  </item>
                  <item type="Uncertainty" >
                   <precision type="int" >4</precision>
                   <uncertainty type="int" >0</uncertainty>
                  </item>
                 </value>
                </uncertainty>
                <adps type="Handle" >
                 <serial_number type="int" >136</serial_number>
                 <value type="AtomicDisplacementParameters" >
                  <uvalues type="Container" >
                   <count type="int" >6</count>
                   <item type="UncertainValue" >
                    <value type="float" >0.049999999999999996</value>
                    <uncertainty type="Uncertainty" >
                     <precision type="int" >1000000</precision>
                     <uncertainty type="int" >0</uncertainty>
                    </uncertainty>
                   </item>
                   <item type="UncertainValue" >
                    <value type="float" >0.050000000000000017</value>
                    <uncertainty type="Uncertainty" >
                     <precision type="int" >1000000</precision>
                     <uncertainty type="int" >0</uncertainty>
                    </uncertainty>
                   </item>
                   <item type="UncertainValue" >
                    <value type="float" >0.05000000000000001</value>
                    <uncertainty type="Uncertainty" >
                     <precision type="int" >1000000</precision>
                     <uncertainty type="int" >0</uncertainty>
                    </uncertainty>
                   </item>
                   <item type="UncertainValue" >
                    <value type="float" >-3.5231050101677831e-18</value>
                    <uncertainty type="Uncertainty" >
                     <precision type="int" >1000000</precision>
                     <uncertainty type="int" >0</uncertainty>
                    </uncertainty>
                   </item>
                   <item type="UncertainValue" >
                    <value type="float" >0.0069742097988007568</value>
                    <uncertainty type="Uncertainty" >
                     <precision type="int" >1000000</precision>
                     <uncertainty type="int" >0</uncertainty>
                    </uncertainty>
                   </item>
                   <item type="UncertainValue" >
                    <value type="float" >-3.5231050101677831e-18</value>
                    <uncertainty type="Uncertainty" >
                     <precision type="int" >1000000</precision>
                     <uncertainty type="int" >0</uncertainty>
                    </uncertainty>
                   </item>
                  </uvalues>
                  <type type="AtomicDisplacementParameters::Type" >
                   <enumerator type="int" >1</enumerator>
                  </type>
                  <u_equivalent type="float" >0.050000000000000003</u_equivalent>
                 </value>
                </adps>
               </value>
              </site>
              <annotations type="Annotations" >
               <annotations type="Container" >
                <count type="int" >1</count>
                <item type="Handle" >
                 <serial_number type="int" >137</serial_number>
                 <value type="FileOrdering" >
                  <value type="Handle" >
                   <serial_number type="int" >138</serial_number>
                   <value type="FileOrdering" >
                    <file_order type="int" >21</file_order>
                   </value>
                  </value>
                 </value>
                </item>
               </annotations>
              </annotations>
             </value>
            </item>
            <item type="Handle" >
             <serial_number type="int" >139</serial_number>
             <value type="Atom3d" >
              <element type="Element" >
               <code type="char" >1</code>
              </element>
              <formal_charge type="int" >0</formal_charge>
              <radius type="float" >0.68000000000000005</radius>
              <label type="string" >C7</label>
              <site type="Handle" >
               <serial_number type="int" >140</serial_number>
               <value type="Site" >
                <orthogonal type="Point" >
                 <coordinates type="Vector" >
                  <vector type="Container" >
                   <count type="int" >3</count>
                   <item type="float" >-0.76700129210600854</item>
                   <item type="float" >0.89547070000000017</item>
                   <item type="float" >2.1131434630464319</item>
                  </vector>
                 </coordinates>
                </orthogonal>
                <fractional type="Point" >
                 <coordinates type="Vector" >
                  <vector type="Container" >
                   <count type="int" >3</count>
                   <item type="float" >-0.045469999999999997</item>
                   <item type="float" >0.12470000000000001</item>
                   <item type="float" >0.088779999999999998</item>
                  </vector>
                 </coordinates>
                </fractional>
                <uncertain_value type="UncertainValue" >
                 <value type="float" >1</value>
                 <uncertainty type="Uncertainty" >
                  <precision type="int" >0</precision>
                  <uncertainty type="int" >0</uncertainty>
                 </uncertainty>
                </uncertain_value>
                <uncertainty type="Handle" >
                 <serial_number type="int" >141</serial_number>
                 <value type="Container" >
                  <count type="int" >3</count>
                  <item type="Uncertainty" >
                   <precision type="int" >5</precision>
                   <uncertainty type="int" >14</uncertainty>
                  </item>
                  <item type="Uncertainty" >
                   <precision type="int" >4</precision>
                   <uncertainty type="int" >2</uncertainty>
                  </item>
                  <item type="Uncertainty" >
                   <precision type="int" >5</precision>
                   <uncertainty type="int" >6</uncertainty>
                  </item>
                 </value>
                </uncertainty>
                <adps type="Handle" >
                 <serial_number type="int" >142</serial_number>
                 <value type="AtomicDisplacementParameters" >
                  <uvalues type="Container" >
                   <count type="int" >6</count>
                   <item type="UncertainValue" >
                    <value type="float" >0.028899999999999999</value>
                    <uncertainty type="Uncertainty" >
                     <precision type="int" >4</precision>
                     <uncertainty type="int" >8</uncertainty>
                    </uncertainty>
                   </item>
                   <item type="UncertainValue" >
                    <value type="float" >0.0229</value>
                    <uncertainty type="Uncertainty" >
                     <precision type="int" >4</precision>
                     <uncertainty type="int" >7</uncertainty>
                    </uncertainty>
                   </item>
                   <item type="UncertainValue" >
                    <value type="float" >0.024799999999999999</value>
                    <uncertainty type="Uncertainty" >
                     <precision type="int" >4</precision>
                     <uncertainty type="int" >7</uncertainty>
                    </uncertainty>
                   </item>
                   <item type="UncertainValue" >
                    <value type="float" >-0.00089999999999999998</value>
                    <uncertainty type="Uncertainty" >
                     <precision type="int" >4</precision>
                     <uncertainty type="int" >6</uncertainty>
                    </uncertainty>
                   </item>
                   <item type="UncertainValue" >
                    <value type="float" >0.0023999999999999998</value>
                    <uncertainty type="Uncertainty" >
                     <precision type="int" >4</precision>
                     <uncertainty type="int" >6</uncertainty>
                    </uncertainty>
                   </item>
                   <item type="UncertainValue" >
                    <value type="float" >-0.0016999999999999999</value>
                    <uncertainty type="Uncertainty" >
                     <precision type="int" >4</precision>
                     <uncertainty type="int" >6</uncertainty>
                    </uncertainty>
                   </item>
                  </uvalues>
                  <type type="AtomicDisplacementParameters::Type" >
                   <enumerator type="int" >0</enumerator>
                  </type>
                  <u_equivalent type="float" >0.025660900090909339</u_equivalent>
                 </value>
                </adps>
               </value>
              </site>
              <annotations type="Annotations" >
               <annotations type="Container" >
                <count type="int" >1</count>
                <item type="Handle" >
                 <serial_number type="int" >143</serial_number>
                 <value type="FileOrdering" >
                  <value type="Handle" >
                   <serial_number type="int" >144</serial_number>
                   <value type="FileOrdering" >
                    <file_order type="int" >22</file_order>
                   </value>
                  </value>
                 </value>
                </item>
               </annotations>
              </annotations>
             </value>
            </item>
            <item type="Handle" >
             <serial_number type="int" >145</serial_number>
             <value type="Atom3d" >
              <element type="Element" >
               <code type="char" >1</code>
              </element>
              <formal_charge type="int" >0</formal_charge>
              <radius type="float" >0.68000000000000005</radius>
              <label type="string" >C8</label>
              <site type="Handle" >
               <serial_number type="int" >146</serial_number>
               <value type="Site" >
                <orthogonal type="Point" >
                 <coordinates type="Vector" >
                  <vector type="Container" >
                   <count type="int" >3</count>
                   <item type="float" >0.5044631654354963</item>
                   <item type="float" >1.5245263000000002</item>
                   <item type="float" >2.5139695040207721</item>
                  </vector>
                 </coordinates>
                </orthogonal>
                <fractional type="Point" >
                 <coordinates type="Vector" >
                  <vector type="Container" >
                   <count type="int" >3</count>
                   <item type="float" >0.083180000000000004</item>
                   <item type="float" >0.21229999999999999</item>
                   <item type="float" >0.10562000000000001</item>
                  </vector>
                 </coordinates>
                </fractional>
                <uncertain_value type="UncertainValue" >
                 <value type="float" >1</value>
                 <uncertainty type="Uncertainty" >
                  <precision type="int" >0</precision>
                  <uncertainty type="int" >0</uncertainty>
                 </uncertainty>
                </uncertain_value>
                <uncertainty type="Handle" >
                 <serial_number type="int" >147</serial_number>
                 <value type="Container" >
                  <count type="int" >3</count>
                  <item type="Uncertainty" >
                   <precision type="int" >5</precision>
                   <uncertainty type="int" >14</uncertainty>
                  </item>
                  <item type="Uncertainty" >
                   <precision type="int" >4</precision>
                   <uncertainty type="int" >2</uncertainty>
                  </item>
                  <item type="Uncertainty" >
                   <precision type="int" >5</precision>
                   <uncertainty type="int" >6</uncertainty>
                  </item>
                 </value>
                </uncertainty>
                <adps type="Handle" >
                 <serial_number type="int" >148</serial_number>
                 <value type="AtomicDisplacementParameters" >
                  <uvalues type="Container" >
                   <count type="int" >6</count>
                   <item type="UncertainValue" >
                    <value type="float" >0.0287</value>
                    <uncertainty type="Uncertainty" >
                     <precision type="int" >4</precision>
                     <uncertainty type="int" >8</uncertainty>
                    </uncertainty>
                   </item>
                   <item type="UncertainValue" >
                    <value type="float" >0.0253</value>
                    <uncertainty type="Uncertainty" >
                     <precision type="int" >4</precision>
                     <uncertainty type="int" >7</uncertainty>
                    </uncertainty>
                   </item>
                   <item type="UncertainValue" >
                    <value type="float" >0.024299999999999999</value>
                    <uncertainty type="Uncertainty" >
                     <precision type="int" >4</precision>
                     <uncertainty type="int" >7</uncertainty>
                    </uncertainty>
                   </item>
                   <item type="UncertainValue" >
                    <value type="float" >-0.0033999999999999998</value>
                    <uncertainty type="Uncertainty" >
                     <precision type="int" >4</precision>
                     <uncertainty type="int" >6</uncertainty>
                    </uncertainty>
                   </item>
                   <item type="UncertainValue" >
                    <value type="float" >0.0057000000000000002</value>
                    <uncertainty type="Uncertainty" >
                     <precision type="int" >4</precision>
                     <uncertainty type="int" >6</uncertainty>
                    </uncertainty>
                   </item>
                   <item type="UncertainValue" >
                    <value type="float" >-0.0044000000000000003</value>
                    <uncertainty type="Uncertainty" >
                     <precision type="int" >4</precision>
                     <uncertainty type="int" >6</uncertainty>
                    </uncertainty>
                   </item>
                  </uvalues>
                  <type type="AtomicDisplacementParameters::Type" >
                   <enumerator type="int" >0</enumerator>
                  </type>
                  <u_equivalent type="float" >0.025909982970571472</u_equivalent>
                 </value>
                </adps>
               </value>
              </site>
              <annotations type="Annotations" >
               <annotations type="Container" >
                <count type="int" >1</count>
                <item type="Handle" >
                 <serial_number type="int" >149</serial_number>
                 <value type="FileOrdering" >
                  <value type="Handle" >
                   <serial_number type="int" >150</serial_number>
                   <value type="FileOrdering" >
                    <file_order type="int" >23</file_order>
                   </value>
                  </value>
                 </value>
                </item>
               </annotations>
              </annotations>
             </value>
            </item>
            <item type="Handle" >
             <serial_number type="int" >151</serial_number>
             <value type="Atom3d" >
              <element type="Element" >
               <code type="char" >1</code>
              </element>
              <formal_charge type="int" >0</formal_charge>
              <radius type="float" >0.68000000000000005</radius>
              <label type="string" >C9</label>
              <site type="Handle" >
               <serial_number type="int" >152</serial_number>
               <value type="Site" >
                <orthogonal type="Point" >
                 <coordinates type="Vector" >
                  <vector type="Container" >
                   <count type="int" >3</count>
                   <item type="float" >0.78765018425071731</item>
                   <item type="float" >2.8027443000000001</item>
                   <item type="float" >2.0255520241636784</item>
                  </vector>
                 </coordinates>
                </orthogonal>
                <fractional type="Point" >
                 <coordinates type="Vector" >
                  <vector type="Container" >
                   <count type="int" >3</count>
                   <item type="float" >0.10395</item>
                   <item type="float" >0.39029999999999998</item>
                   <item type="float" >0.085099999999999995</item>
                  </vector>
                 </coordinates>
                </fractional>
                <uncertain_value type="UncertainValue" >
                 <value type="float" >1</value>
                 <uncertainty type="Uncertainty" >
                  <precision type="int" >0</precision>
                  <uncertainty type="int" >0</uncertainty>
                 </uncertainty>
                </uncertain_value>
                <uncertainty type="Handle" >
                 <serial_number type="int" >153</serial_number>
                 <value type="Container" >
                  <count type="int" >3</count>
                  <item type="Uncertainty" >
                   <precision type="int" >5</precision>
                   <uncertainty type="int" >15</uncertainty>
                  </item>
                  <item type="Uncertainty" >
                   <precision type="int" >4</precision>
                   <uncertainty type="int" >2</uncertainty>
                  </item>
                  <item type="Uncertainty" >
                   <precision type="int" >5</precision>
                   <uncertainty type="int" >6</uncertainty>
                  </item>
                 </value>
                </uncertainty>
                <adps type="Handle" >
                 <serial_number type="int" >154</serial_number>
                 <value type="AtomicDisplacementParameters" >
                  <uvalues type="Container" >
                   <count type="int" >6</count>
                   <item type="UncertainValue" >
                    <value type="float" >0.0327</value>
                    <uncertainty type="Uncertainty" >
                     <precision type="int" >4</precision>
                     <uncertainty type="int" >8</uncertainty>
                    </uncertainty>
                   </item>
                   <item type="UncertainValue" >
                    <value type="float" >0.025000000000000001</value>
                    <uncertainty type="Uncertainty" >
                     <precision type="int" >4</precision>
                     <uncertainty type="int" >7</uncertainty>
                    </uncertainty>
                   </item>
                   <item type="UncertainValue" >
                    <value type="float" >0.028899999999999999</value>
                    <uncertainty type="Uncertainty" >
                     <precision type="int" >4</precision>
                     <uncertainty type="int" >7</uncertainty>
                    </uncertainty>
                   </item>
                   <item type="UncertainValue" >
                    <value type="float" >-0.00050000000000000001</value>
                    <uncertainty type="Uncertainty" >
                     <precision type="int" >4</precision>
                     <uncertainty type="int" >6</uncertainty>
                    </uncertainty>
                   </item>
                   <item type="UncertainValue" >
                    <value type="float" >0.0044000000000000003</value>
                    <uncertainty type="Uncertainty" >
                     <precision type="int" >4</precision>
                     <uncertainty type="int" >6</uncertainty>
                    </uncertainty>
                   </item>
                   <item type="UncertainValue" >
                    <value type="float" >-0.0012999999999999999</value>
                    <uncertainty type="Uncertainty" >
                     <precision type="int" >4</precision>
                     <uncertainty type="int" >6</uncertainty>
                    </uncertainty>
                   </item>
                  </uvalues>
                  <type type="AtomicDisplacementParameters::Type" >
                   <enumerator type="int" >0</enumerator>
                  </type>
                  <u_equivalent type="float" >0.028856814612167835</u_equivalent>
                 </value>
                </adps>
               </value>
              </site>
              <annotations type="Annotations" >
               <annotations type="Container" >
                <count type="int" >1</count>
                <item type="Handle" >
                 <serial_number type="int" >155</serial_number>
                 <value type="FileOrdering" >
                  <value type="Handle" >
                   <serial_number type="int" >156</serial_number>
                   <value type="FileOrdering" >
                    <file_order type="int" >24</file_order>
                   </value>
                  </value>
                 </value>
                </item>
               </annotations>
              </annotations>
             </value>
            </item>
            <item type="Handle" >
             <serial_number type="int" >157</serial_number>
             <value type="Atom3d" >
              <element type="Element" >
               <code type="char" >2</code>
              </element>
              <formal_charge type="int" >0</formal_charge>
              <radius type="float" >0.23000000000000001</radius>
              <label type="string" >H9</label>
              <site type="Handle" >
               <serial_number type="int" >158</serial_number>
               <value type="Site" >
                <orthogonal type="Point" >
                 <coordinates type="Vector" >
                  <vector type="Container" >
                   <count type="int" >3</count>
                   <item type="float" >0.19442188449814715</item>
                   <item type="float" >3.2099070000000003</item>
                   <item type="float" >1.4043192646963223</item>
                  </vector>
                 </coordinates>
                </orthogonal>
                <fractional type="Point" >
                 <coordinates type="Vector" >
                  <vector type="Container" >
                   <count type="int" >3</count>
                   <item type="float" >0.037999999999999999</item>
                   <item type="float" >0.44700000000000001</item>
                   <item type="float" >0.058999999999999997</item>
                  </vector>
                 </coordinates>
                </fractional>
                <uncertain_value type="UncertainValue" >
                 <value type="float" >1</value>
                 <uncertainty type="Uncertainty" >
                  <precision type="int" >0</precision>
                  <uncertainty type="int" >0</uncertainty>
                 </uncertainty>
                </uncertain_value>
                <uncertainty type="Handle" >
                 <serial_number type="int" >159</serial_number>
                 <value type="Container" >
                  <count type="int" >3</count>
                  <item type="Uncertainty" >
                   <precision type="int" >4</precision>
                   <uncertainty type="int" >0</uncertainty>
                  </item>
                  <item type="Uncertainty" >
                   <precision type="int" >4</precision>
                   <uncertainty type="int" >0</uncertainty>
                  </item>
                  <item type="Uncertainty" >
                   <precision type="int" >4</precision>
                   <uncertainty type="int" >0</uncertainty>
                  </item>
                 </value>
                </uncertainty>
                <adps type="Handle" >
                 <serial_number type="int" >160</serial_number>
                 <value type="AtomicDisplacementParameters" >
                  <uvalues type="Container" >
                   <count type="int" >6</count>
                   <item type="UncertainValue" >
                    <value type="float" >0.034999999999999996</value>
                    <uncertainty type="Uncertainty" >
                     <precision type="int" >1000000</precision>
                     <uncertainty type="int" >0</uncertainty>
                    </uncertainty>
                   </item>
                   <item type="UncertainValue" >
                    <value type="float" >0.03500000000000001</value>
                    <uncertainty type="Uncertainty" >
                     <precision type="int" >1000000</precision>
                     <uncertainty type="int" >0</uncertainty>
                    </uncertainty>
                   </item>
                   <item type="UncertainValue" >
                    <value type="float" >0.03500000000000001</value>
                    <uncertainty type="Uncertainty" >
                     <precision type="int" >1000000</precision>
                     <uncertainty type="int" >0</uncertainty>
                    </uncertainty>
                   </item>
                   <item type="UncertainValue" >
                    <value type="float" >-2.4661735071174481e-18</value>
                    <uncertainty type="Uncertainty" >
                     <precision type="int" >1000000</precision>
                     <uncertainty type="int" >0</uncertainty>
                    </uncertainty>
                   </item>
                   <item type="UncertainValue" >
                    <value type="float" >0.0048819468591605308</value>
                    <uncertainty type="Uncertainty" >
                     <precision type="int" >1000000</precision>
                     <uncertainty type="int" >0</uncertainty>
                    </uncertainty>
                   </item>
                   <item type="UncertainValue" >
                    <value type="float" >-2.4661735071174485e-18</value>
                    <uncertainty type="Uncertainty" >
                     <precision type="int" >1000000</precision>
                     <uncertainty type="int" >0</uncertainty>
                    </uncertainty>
                   </item>
                  </uvalues>
                  <type type="AtomicDisplacementParameters::Type" >
                   <enumerator type="int" >1</enumerator>
                  </type>
                  <u_equivalent type="float" >0.035000000000000003</u_equivalent>
                 </value>
                </adps>
               </value>
              </site>
              <annotations type="Annotations" >
               <annotations type="Container" >
                <count type="int" >1</count>
                <item type="Handle" >
                 <serial_number type="int" >161</serial_number>
                 <value type="FileOrdering" >
                  <value type="Handle" >
                   <serial_number type="int" >162</serial_number>
                   <value type="FileOrdering" >
                    <file_order type="int" >25</file_order>
                   </value>
                  </value>
                 </value>
                </item>
               </annotations>
              </annotations>
             </value>
            </item>
            <item type="Handle" >
             <serial_number type="int" >163</serial_number>
             <value type="Atom3d" >
              <element type="Element" >
               <code type="char" >1</code>
              </element>
              <formal_charge type="int" >0</formal_charge>
              <radius type="float" >0.68000000000000005</radius>
              <label type="string" >C10</label>
              <site type="Handle" >
               <serial_number type="int" >164</serial_number>
               <value type="Site" >
                <orthogonal type="Point" >
                 <coordinates type="Vector" >
                  <vector type="Container" >
                   <count type="int" >3</count>
                   <item type="float" >1.9203153804094986</item>
                   <item type="float" >3.4820669</item>
                   <item type="float" >2.4349467928548099</item>
                  </vector>
                 </coordinates>
                </orthogonal>
                <fractional type="Point" >
                 <coordinates type="Vector" >
                  <vector type="Container" >
                   <count type="int" >3</count>
                   <item type="float" >0.21926999999999999</item>
                   <item type="float" >0.4849</item>
                   <item type="float" >0.1023</item>
                  </vector>
                 </coordinates>
                </fractional>
                <uncertain_value type="UncertainValue" >
                 <value type="float" >1</value>
                 <uncertainty type="Uncertainty" >
                  <precision type="int" >0</precision>
                  <uncertainty type="int" >0</uncertainty>
                 </uncertainty>
                </uncertain_value>
                <uncertainty type="Handle" >
                 <serial_number type="int" >165</serial_number>
                 <value type="Container" >
                  <count type="int" >3</count>
                  <item type="Uncertainty" >
                   <precision type="int" >5</precision>
                   <uncertainty type="int" >15</uncertainty>
                  </item>
                  <item type="Uncertainty" >
                   <precision type="int" >4</precision>
                   <uncertainty type="int" >2</uncertainty>
                  </item>
                  <item type="Uncertainty" >
                   <precision type="int" >5</precision>
                   <uncertainty type="int" >6</uncertainty>
                  </item>
                 </value>
                </uncertainty>
                <adps type="Handle" >
                 <serial_number type="int" >166</serial_number>
                 <value type="AtomicDisplacementParameters" >
                  <uvalues type="Container" >
                   <count type="int" >6</count>
                   <item type="UncertainValue" >
                    <value type="float" >0.037199999999999997</value>
                    <uncertainty type="Uncertainty" >
                     <precision type="int" >4</precision>
                     <uncertainty type="int" >9</uncertainty>
                    </uncertainty>
                   </item>
                   <item type="UncertainValue" >
                    <value type="float" >0.020799999999999999</value>
                    <uncertainty type="Uncertainty" >
                     <precision type="int" >4</precision>
                     <uncertainty type="int" >7</uncertainty>
                    </uncertainty>
                   </item>
                   <item type="UncertainValue" >
                    <value type="float" >0.0327</value>
                    <uncertainty type="Uncertainty" >
                     <precision type="int" >4</precision>
                     <uncertainty type="int" >8</uncertainty>
                    </uncertainty>
                   </item>
                   <item type="UncertainValue" >
                    <value type="float" >-0.0044000000000000003</value>
                    <uncertainty type="Uncertainty" >
                     <precision type="int" >4</precision>
                     <uncertainty type="int" >6</uncertainty>
                    </uncertainty>
                   </item>
                   <item type="UncertainValue" >
                    <value type="float" >0.0085000000000000006</value>
                    <uncertainty type="Uncertainty" >
                     <precision type="int" >4</precision>
                     <uncertainty type="int" >7</uncertainty>
                    </uncertainty>
                   </item>
                   <item type="UncertainValue" >
                    <value type="float" >-0.002</value>
                    <uncertainty type="Uncertainty" >
                     <precision type="int" >4</precision>
                     <uncertainty type="int" >6</uncertainty>
                    </uncertainty>
                   </item>
                  </uvalues>
                  <type type="AtomicDisplacementParameters::Type" >
                   <enumerator type="int" >0</enumerator>
                  </type>
                  <u_equivalent type="float" >0.029889555496155712</u_equivalent>
                 </value>
                </adps>
               </value>
              </site>
              <annotations type="Annotations" >
               <annotations type="Container" >
                <count type="int" >1</count>
                <item type="Handle" >
                 <serial_number type="int" >167</serial_number>
                 <value type="FileOrdering" >
                  <value type="Handle" >
                   <serial_number type="int" >168</serial_number>
                   <value type="FileOrdering" >
                    <file_order type="int" >26</file_order>
                   </value>
                  </value>
                 </value>
                </item>
               </annotations>
              </annotations>
             </value>
            </item>
            <item type="Handle" >
             <serial_number type="int" >169</serial_number>
             <value type="Atom3d" >
              <element type="Element" >
               <code type="char" >2</code>
              </element>
              <formal_charge type="int" >0</formal_charge>
              <radius type="float" >0.23000000000000001</radius>
              <label type="string" >H10</label>
              <site type="Handle" >
               <serial_number type="int" >170</serial_number>
               <value type="Site" >
                <orthogonal type="Point" >
                 <coordinates type="Vector" >
                  <vector type="Container" >
                   <count type="int" >3</count>
                   <item type="float" >2.089001939394691</item>
                   <item type="float" >4.3531221999999996</item>
                   <item type="float" >2.096958088470271</item>
                  </vector>
                 </coordinates>
                </orthogonal>
                <fractional type="Point" >
                 <coordinates type="Vector" >
                  <vector type="Container" >
                   <count type="int" >3</count>
                   <item type="float" >0.23100000000000001</item>
                   <item type="float" >0.60619999999999996</item>
                   <item type="float" >0.088099999999999998</item>
                  </vector>
                 </coordinates>
                </fractional>
                <uncertain_value type="UncertainValue" >
                 <value type="float" >1</value>
                 <uncertainty type="Uncertainty" >
                  <precision type="int" >0</precision>
                  <uncertainty type="int" >0</uncertainty>
                 </uncertainty>
                </uncertain_value>
                <uncertainty type="Handle" >
                 <serial_number type="int" >171</serial_number>
                 <value type="Container" >
                  <count type="int" >3</count>
                  <item type="Uncertainty" >
                   <precision type="int" >4</precision>
                   <uncertainty type="int" >0</uncertainty>
                  </item>
                  <item type="Uncertainty" >
                   <precision type="int" >4</precision>
                   <uncertainty type="int" >0</uncertainty>
                  </item>
                  <item type="Uncertainty" >
                   <precision type="int" >4</precision>
                   <uncertainty type="int" >0</uncertainty>
                  </item>
                 </value>
                </uncertainty>
                <adps type="Handle" >
                 <serial_number type="int" >172</serial_number>
                 <value type="AtomicDisplacementParameters" >
                  <uvalues type="Container" >
                   <count type="int" >6</count>
                   <item type="UncertainValue" >
                    <value type="float" >0.03599999999999999</value>
                    <uncertainty type="Uncertainty" >
                     <precision type="int" >1000000</precision>
                     <uncertainty type="int" >0</uncertainty>
                    </uncertainty>
                   </item>
                   <item type="UncertainValue" >
                    <value type="float" >0.036000000000000004</value>
                    <uncertainty type="Uncertainty" >
                     <precision type="int" >1000000</precision>
                     <uncertainty type="int" >0</uncertainty>
                    </uncertainty>
                   </item>
                   <item type="UncertainValue" >
                    <value type="float" >0.035999999999999997</value>
                    <uncertainty type="Uncertainty" >
                     <precision type="int" >1000000</precision>
                     <uncertainty type="int" >0</uncertainty>
                    </uncertainty>
                   </item>
                   <item type="UncertainValue" >
                    <value type="float" >-2.536635607320803e-18</value>
                    <uncertainty type="Uncertainty" >
                     <precision type="int" >1000000</precision>
                     <uncertainty type="int" >0</uncertainty>
                    </uncertainty>
                   </item>
                   <item type="UncertainValue" >
                    <value type="float" >0.0050214310551365444</value>
                    <uncertainty type="Uncertainty" >
                     <precision type="int" >1000000</precision>
                     <uncertainty type="int" >0</uncertainty>
                    </uncertainty>
                   </item>
                   <item type="UncertainValue" >
                    <value type="float" >-2.5366356073208034e-18</value>
                    <uncertainty type="Uncertainty" >
                     <precision type="int" >1000000</precision>
                     <uncertainty type="int" >0</uncertainty>
                    </uncertainty>
                   </item>
                  </uvalues>
                  <type type="AtomicDisplacementParameters::Type" >
                   <enumerator type="int" >1</enumerator>
                  </type>
                  <u_equivalent type="float" >0.035999999999999997</u_equivalent>
                 </value>
                </adps>
               </value>
              </site>
              <annotations type="Annotations" >
               <annotations type="Container" >
                <count type="int" >1</count>
                <item type="Handle" >
                 <serial_number type="int" >173</serial_number>
                 <value type="FileOrdering" >
                  <value type="Handle" >
                   <serial_number type="int" >174</serial_number>
                   <value type="FileOrdering" >
                    <file_order type="int" >27</file_order>
                   </value>
                  </value>
                 </value>
                </item>
               </annotations>
              </annotations>
             </value>
            </item>
            <item type="Handle" >
             <serial_number type="int" >175</serial_number>
             <value type="Atom3d" >
              <element type="Element" >
               <code type="char" >1</code>
              </element>
              <formal_charge type="int" >0</formal_charge>
              <radius type="float" >0.68000000000000005</radius>
              <label type="string" >C11</label>
              <site type="Handle" >
               <serial_number type="int" >176</serial_number>
               <value type="Site" >
                <orthogonal type="Point" >
                 <coordinates type="Vector" >
                  <vector type="Container" >
                   <count type="int" >3</count>
                   <item type="float" >2.8209703326940718</item>
                   <item type="float" >2.9090231000000006</item>
                   <item type="float" >3.3365673648327197</item>
                  </vector>
                 </coordinates>
                </orthogonal>
                <fractional type="Point" >
                 <coordinates type="Vector" >
                  <vector type="Container" >
                   <count type="int" >3</count>
                   <item type="float" >0.31883</item>
                   <item type="float" >0.40510000000000002</item>
                   <item type="float" >0.14018</item>
                  </vector>
                 </coordinates>
                </fractional>
                <uncertain_value type="UncertainValue" >
                 <value type="float" >1</value>
                 <uncertainty type="Uncertainty" >
                  <precision type="int" >0</precision>
                  <uncertainty type="int" >0</uncertainty>
                 </uncertainty>
                </uncertain_value>
                <uncertainty type="Handle" >
                 <serial_number type="int" >177</serial_number>
                 <value type="Container" >
                  <count type="int" >3</count>
                  <item type="Uncertainty" >
                   <precision type="int" >5</precision>
                   <uncertainty type="int" >15</uncertainty>
                  </item>
                  <item type="Uncertainty" >
                   <precision type="int" >4</precision>
                   <uncertainty type="int" >2</uncertainty>
                  </item>
                  <item type="Uncertainty" >
                   <precision type="int" >5</precision>
                   <uncertainty type="int" >6</uncertainty>
                  </item>
                 </value>
                </uncertainty>
                <adps type="Handle" >
                 <serial_number type="int" >178</serial_number>
                 <value type="AtomicDisplacementParameters" >
                  <uvalues type="Container" >
                   <count type="int" >6</count>
                   <item type="UncertainValue" >
                    <value type="float" >0.030800000000000001</value>
                    <uncertainty type="Uncertainty" >
                     <precision type="int" >4</precision>
                     <uncertainty type="int" >8</uncertainty>
                    </uncertainty>
                   </item>
                   <item type="UncertainValue" >
                    <value type="float" >0.0224</value>
                    <uncertainty type="Uncertainty" >
                     <precision type="int" >4</precision>
                     <uncertainty type="int" >7</uncertainty>
                    </uncertainty>
                   </item>
                   <item type="UncertainValue" >
                    <value type="float" >0.0292</value>
                    <uncertainty type="Uncertainty" >
                     <precision type="int" >4</precision>
                     <uncertainty type="int" >7</uncertainty>
                    </uncertainty>
                   </item>
                   <item type="UncertainValue" >
                    <value type="float" >-0.0028</value>
                    <uncertainty type="Uncertainty" >
                     <precision type="int" >4</precision>
                     <uncertainty type="int" >6</uncertainty>
                    </uncertainty>
                   </item>
                   <item type="UncertainValue" >
                    <value type="float" >0.0076</value>
                    <uncertainty type="Uncertainty" >
                     <precision type="int" >4</precision>
                     <uncertainty type="int" >6</uncertainty>
                    </uncertainty>
                   </item>
                   <item type="UncertainValue" >
                    <value type="float" >-0.0054000000000000003</value>
                    <uncertainty type="Uncertainty" >
                     <precision type="int" >4</precision>
                     <uncertainty type="int" >6</uncertainty>
                    </uncertainty>
                   </item>
                  </uvalues>
                  <type type="AtomicDisplacementParameters::Type" >
                   <enumerator type="int" >0</enumerator>
                  </type>
                  <u_equivalent type="float" >0.027142761715728755</u_equivalent>
                 </value>
                </adps>
               </value>
              </site>
              <annotations type="Annotations" >
               <annotations type="Container" >
                <count type="int" >1</count>
                <item type="Handle" >
                 <serial_number type="int" >179</serial_number>
                 <value type="FileOrdering" >
                  <value type="Handle" >
                   <serial_number type="int" >180</serial_number>
                   <value type="FileOrdering" >
                    <file_order type="int" >28</file_order>
                   </value>
                  </value>
                 </value>
                </item>
               </annotations>
              </annotations>
             </value>
            </item>
            <item type="Handle" >
             <serial_number type="int" >181</serial_number>
             <value type="Atom3d" >
              <element type="Element" >
               <code type="char" >1</code>
              </element>
              <formal_charge type="int" >0</formal_charge>
              <radius type="float" >0.68000000000000005</radius>
              <label type="string" >C12</label>
              <site type="Handle" >
               <serial_number type="int" >182</serial_number>
               <value type="Site" >
                <orthogonal type="Point" >
                 <coordinates type="Vector" >
                  <vector type="Container" >
                   <count type="int" >3</count>
                   <item type="float" >3.9828414741148035</item>
                   <item type="float" >3.6084525000000003</item>
                   <item type="float" >3.809751550971074</item>
                  </vector>
                 </coordinates>
                </orthogonal>
                <fractional type="Point" >
                 <coordinates type="Vector" >
                  <vector type="Container" >
                   <count type="int" >3</count>
                   <item type="float" >0.43785000000000002</item>
                   <item type="float" >0.50249999999999995</item>
                   <item type="float" >0.16006000000000001</item>
                  </vector>
                 </coordinates>
                </fractional>
                <uncertain_value type="UncertainValue" >
                 <value type="float" >1</value>
                 <uncertainty type="Uncertainty" >
                  <precision type="int" >0</precision>
                  <uncertainty type="int" >0</uncertainty>
                 </uncertainty>
                </uncertain_value>
                <uncertainty type="Handle" >
                 <serial_number type="int" >183</serial_number>
                 <value type="Container" >
                  <count type="int" >3</count>
                  <item type="Uncertainty" >
                   <precision type="int" >5</precision>
                   <uncertainty type="int" >16</uncertainty>
                  </item>
                  <item type="Uncertainty" >
                   <precision type="int" >4</precision>
                   <uncertainty type="int" >2</uncertainty>
                  </item>
                  <item type="Uncertainty" >
                   <precision type="int" >5</precision>
                   <uncertainty type="int" >7</uncertainty>
                  </item>
                 </value>
                </uncertainty>
                <adps type="Handle" >
                 <serial_number type="int" >184</serial_number>
                 <value type="AtomicDisplacementParameters" >
                  <uvalues type="Container" >
                   <count type="int" >6</count>
                   <item type="UncertainValue" >
                    <value type="float" >0.034099999999999998</value>
                    <uncertainty type="Uncertainty" >
                     <precision type="int" >4</precision>
                     <uncertainty type="int" >9</uncertainty>
                    </uncertainty>
                   </item>
                   <item type="UncertainValue" >
                    <value type="float" >0.023300000000000001</value>
                    <uncertainty type="Uncertainty" >
                     <precision type="int" >4</precision>
                     <uncertainty type="int" >8</uncertainty>
                    </uncertainty>
                   </item>
                   <item type="UncertainValue" >
                    <value type="float" >0.043799999999999999</value>
                    <uncertainty type="Uncertainty" >
                     <precision type="int" >4</precision>
                     <uncertainty type="int" >9</uncertainty>
                    </uncertainty>
                   </item>
                   <item type="UncertainValue" >
                    <value type="float" >-0.0054999999999999997</value>
                    <uncertainty type="Uncertainty" >
                     <precision type="int" >4</precision>
                     <uncertainty type="int" >6</uncertainty>
                    </uncertainty>
                   </item>
                   <item type="UncertainValue" >
                    <value type="float" >0.0092999999999999992</value>
                    <uncertainty type="Uncertainty" >
                     <precision type="int" >4</precision>
                     <uncertainty type="int" >7</uncertainty>
                    </uncertainty>
                   </item>
                   <item type="UncertainValue" >
                    <value type="float" >-0.0047999999999999996</value>
                    <uncertainty type="Uncertainty" >
                     <precision type="int" >4</precision>
                     <uncertainty type="int" >7</uncertainty>
                    </uncertainty>
                   </item>
                  </uvalues>
                  <type type="AtomicDisplacementParameters::Type" >
                   <enumerator type="int" >0</enumerator>
                  </type>
                  <u_equivalent type="float" >0.033366599540009603</u_equivalent>
                 </value>
                </adps>
               </value>
              </site>
              <annotations type="Annotations" >
               <annotations type="Container" >
                <count type="int" >1</count>
                <item type="Handle" >
                 <serial_number type="int" >185</serial_number>
                 <value type="FileOrdering" >
                  <value type="Handle" >
                   <serial_number type="int" >186</serial_number>
                   <value type="FileOrdering" >
                    <file_order type="int" >29</file_order>
                   </value>
                  </value>
                 </value>
                </item>
               </annotations>
              </annotations>
             </value>
            </item>
            <item type="Handle" >
             <serial_number type="int" >187</serial_number>
             <value type="Atom3d" >
              <element type="Element" >
               <code type="char" >2</code>
              </element>
              <formal_charge type="int" >0</formal_charge>
              <radius type="float" >0.23000000000000001</radius>
              <label type="string" >H12</label>
              <site type="Handle" >
               <serial_number type="int" >188</serial_number>
               <value type="Site" >
                <orthogonal type="Point" >
                 <coordinates type="Vector" >
                  <vector type="Container" >
                   <count type="int" >3</count>
                   <item type="float" >4.1787464744827183</item>
                   <item type="float" >4.4708906000000006</item>
                   <item type="float" >3.4631941188697435</item>
                  </vector>
                 </coordinates>
                </orthogonal>
                <fractional type="Point" >
                 <coordinates type="Vector" >
                  <vector type="Container" >
                   <count type="int" >3</count>
                   <item type="float" >0.4521</item>
                   <item type="float" >0.62260000000000004</item>
                   <item type="float" >0.14549999999999999</item>
                  </vector>
                 </coordinates>
                </fractional>
                <uncertain_value type="UncertainValue" >
                 <value type="float" >1</value>
                 <uncertainty type="Uncertainty" >
                  <precision type="int" >0</precision>
                  <uncertainty type="int" >0</uncertainty>
                 </uncertainty>
                </uncertain_value>
                <uncertainty type="Handle" >
                 <serial_number type="int" >189</serial_number>
                 <value type="Container" >
                  <count type="int" >3</count>
                  <item type="Uncertainty" >
                   <precision type="int" >4</precision>
                   <uncertainty type="int" >0</uncertainty>
                  </item>
                  <item type="Uncertainty" >
                   <precision type="int" >4</precision>
                   <uncertainty type="int" >0</uncertainty>
                  </item>
                  <item type="Uncertainty" >
                   <precision type="int" >4</precision>
                   <uncertainty type="int" >0</uncertainty>
                  </item>
                 </value>
                </uncertainty>
                <adps type="Handle" >
                 <serial_number type="int" >190</serial_number>
                 <value type="AtomicDisplacementParameters" >
                  <uvalues type="Container" >
                   <count type="int" >6</count>
                   <item type="UncertainValue" >
                    <value type="float" >0.039999999999999994</value>
                    <uncertainty type="Uncertainty" >
                     <precision type="int" >1000000</precision>
                     <uncertainty type="int" >0</uncertainty>
                    </uncertainty>
                   </item>
                   <item type="UncertainValue" >
                    <value type="float" >0.040000000000000001</value>
                    <uncertainty type="Uncertainty" >
                     <precision type="int" >1000000</precision>
                     <uncertainty type="int" >0</uncertainty>
                    </uncertainty>
                   </item>
                   <item type="UncertainValue" >
                    <value type="float" >0.040000000000000008</value>
                    <uncertainty type="Uncertainty" >
                     <precision type="int" >1000000</precision>
                     <uncertainty type="int" >0</uncertainty>
                    </uncertainty>
                   </item>
                   <item type="UncertainValue" >
                    <value type="float" >-2.8184840081342265e-18</value>
                    <uncertainty type="Uncertainty" >
                     <precision type="int" >1000000</precision>
                     <uncertainty type="int" >0</uncertainty>
                    </uncertainty>
                   </item>
                   <item type="UncertainValue" >
                    <value type="float" >0.0055793678390406052</value>
                    <uncertainty type="Uncertainty" >
                     <precision type="int" >1000000</precision>
                     <uncertainty type="int" >0</uncertainty>
                    </uncertainty>
                   </item>
                   <item type="UncertainValue" >
                    <value type="float" >-2.8184840081342265e-18</value>
                    <uncertainty type="Uncertainty" >
                     <precision type="int" >1000000</precision>
                     <uncertainty type="int" >0</uncertainty>
                    </uncertainty>
                   </item>
                  </uvalues>
                  <type type="AtomicDisplacementParameters::Type" >
                   <enumerator type="int" >1</enumerator>
                  </type>
                  <u_equivalent type="float" >0.040000000000000001</u_equivalent>
                 </value>
                </adps>
               </value>
              </site>
              <annotations type="Annotations" >
               <annotations type="Container" >
                <count type="int" >1</count>
                <item type="Handle" >
                 <serial_number type="int" >191</serial_number>
                 <value type="FileOrdering" >
                  <value type="Handle" >
                   <serial_number type="int" >192</serial_number>
                   <value type="FileOrdering" >
                    <file_order type="int" >30</file_order>
                   </value>
                  </value>
                 </value>
                </item>
               </annotations>
              </annotations>
             </value>
            </item>
            <item type="Handle" >
             <serial_number type="int" >193</serial_number>
             <value type="Atom3d" >
              <element type="Element" >
               <code type="char" >1</code>
              </element>
              <formal_charge type="int" >0</formal_charge>
              <radius type="float" >0.68000000000000005</radius>
              <label type="string" >C13</label>
              <site type="Handle" >
               <serial_number type="int" >194</serial_number>
               <value type="Site" >
                <orthogonal type="Point" >
                 <coordinates type="Vector" >
                  <vector type="Container" >
                   <count type="int" >3</count>
                   <item type="float" >4.8029041935159533</item>
                   <item type="float" >3.0655689000000006</item>
                   <item type="float" >4.7361262252419358</item>
                  </vector>
                 </coordinates>
                </orthogonal>
                <fractional type="Point" >
                 <coordinates type="Vector" >
                  <vector type="Container" >
                   <count type="int" >3</count>
                   <item type="float" >0.52993999999999997</item>
                   <item type="float" >0.4269</item>
                   <item type="float" >0.19897999999999999</item>
                  </vector>
                 </coordinates>
                </fractional>
                <uncertain_value type="UncertainValue" >
                 <value type="float" >1</value>
                 <uncertainty type="Uncertainty" >
                  <precision type="int" >0</precision>
                  <uncertainty type="int" >0</uncertainty>
                 </uncertainty>
                </uncertain_value>
                <uncertainty type="Handle" >
                 <serial_number type="int" >195</serial_number>
                 <value type="Container" >
                  <count type="int" >3</count>
                  <item type="Uncertainty" >
                   <precision type="int" >5</precision>
                   <uncertainty type="int" >16</uncertainty>
                  </item>
                  <item type="Uncertainty" >
                   <precision type="int" >4</precision>
                   <uncertainty type="int" >2</uncertainty>
                  </item>
                  <item type="Uncertainty" >
                   <precision type="int" >5</precision>
                   <uncertainty type="int" >7</uncertainty>
                  </item>
                 </value>
                </uncertainty>
                <adps type="Handle" >
                 <serial_number type="int" >196</serial_number>
                 <value type="AtomicDisplacementParameters" >
                  <uvalues type="Container" >
                   <count type="int" >6</count>
                   <item type="UncertainValue" >
                    <value type="float" >0.029999999999999999</value>
                    <uncertainty type="Uncertainty" >
                     <precision type="int" >4</precision>
                     <uncertainty type="int" >8</uncertainty>
                    </uncertainty>
                   </item>
                   <item type="UncertainValue" >
                    <value type="float" >0.030700000000000002</value>
                    <uncertainty type="Uncertainty" >
                     <precision type="int" >4</precision>
                     <uncertainty type="int" >8</uncertainty>
                    </uncertainty>
                   </item>
                   <item type="UncertainValue" >
                    <value type="float" >0.0424</value>
                    <uncertainty type="Uncertainty" >
                     <precision type="int" >4</precision>
                     <uncertainty type="int" >9</uncertainty>
                    </uncertainty>
                   </item>
                   <item type="UncertainValue" >
                    <value type="float" >-0.0071999999999999998</value>
                    <uncertainty type="Uncertainty" >
                     <precision type="int" >4</precision>
                     <uncertainty type="int" >7</uncertainty>
                    </uncertainty>
                   </item>
                   <item type="UncertainValue" >
                    <value type="float" >0.0061000000000000004</value>
                    <uncertainty type="Uncertainty" >
                     <precision type="int" >4</precision>
                     <uncertainty type="int" >7</uncertainty>
                    </uncertainty>
                   </item>
                   <item type="UncertainValue" >
                    <value type="float" >-0.011900000000000001</value>
                    <uncertainty type="Uncertainty" >
                     <precision type="int" >4</precision>
                     <uncertainty type="int" >7</uncertainty>
                    </uncertainty>
                   </item>
                  </uvalues>
                  <type type="AtomicDisplacementParameters::Type" >
                   <enumerator type="int" >0</enumerator>
                  </type>
                  <u_equivalent type="float" >0.034267026650431777</u_equivalent>
                 </value>
                </adps>
               </value>
              </site>
              <annotations type="Annotations" >
               <annotations type="Container" >
                <count type="int" >1</count>
                <item type="Handle" >
                 <serial_number type="int" >197</serial_number>
                 <value type="FileOrdering" >
                  <value type="Handle" >
                   <serial_number type="int" >198</serial_number>
                   <value type="FileOrdering" >
                    <file_order type="int" >31</file_order>
                   </value>
                  </value>
                 </value>
                </item>
               </annotations>
              </annotations>
             </value>
            </item>
            <item type="Handle" >
             <serial_number type="int" >199</serial_number>
             <value type="Atom3d" >
              <element type="Element" >
               <code type="char" >2</code>
              </element>
              <formal_charge type="int" >0</formal_charge>
              <radius type="float" >0.23000000000000001</radius>
              <label type="string" >H13</label>
              <site type="Handle" >
               <serial_number type="int" >200</serial_number>
               <value type="Site" >
                <orthogonal type="Point" >
                 <coordinates type="Vector" >
                  <vector type="Container" >
                   <count type="int" >3</count>
                   <item type="float" >5.5481358186789311</item>
                   <item type="float" >3.5660846000000004</item>
                   <item type="float" >5.0484087464761007</item>
                  </vector>
                 </coordinates>
                </orthogonal>
                <fractional type="Point" >
                 <coordinates type="Vector" >
                  <vector type="Container" >
                   <count type="int" >3</count>
                   <item type="float" >0.60640000000000005</item>
                   <item type="float" >0.49659999999999999</item>
                   <item type="float" >0.21210000000000001</item>
                  </vector>
                 </coordinates>
                </fractional>
                <uncertain_value type="UncertainValue" >
                 <value type="float" >1</value>
                 <uncertainty type="Uncertainty" >
                  <precision type="int" >0</precision>
                  <uncertainty type="int" >0</uncertainty>
                 </uncertainty>
                </uncertain_value>
                <uncertainty type="Handle" >
                 <serial_number type="int" >201</serial_number>
                 <value type="Container" >
                  <count type="int" >3</count>
                  <item type="Uncertainty" >
                   <precision type="int" >4</precision>
                   <uncertainty type="int" >0</uncertainty>
                  </item>
                  <item type="Uncertainty" >
                   <precision type="int" >4</precision>
                   <uncertainty type="int" >0</uncertainty>
                  </item>
                  <item type="Uncertainty" >
                   <precision type="int" >4</precision>
                   <uncertainty type="int" >0</uncertainty>
                  </item>
                 </value>
                </uncertainty>
                <adps type="Handle" >
                 <serial_number type="int" >202</serial_number>
                 <value type="AtomicDisplacementParameters" >
                  <uvalues type="Container" >
                   <count type="int" >6</count>
                   <item type="UncertainValue" >
                    <value type="float" >0.041000000000000002</value>
                    <uncertainty type="Uncertainty" >
                     <precision type="int" >1000000</precision>
                     <uncertainty type="int" >0</uncertainty>
                    </uncertainty>
                   </item>
                   <item type="UncertainValue" >
                    <value type="float" >0.041000000000000009</value>
                    <uncertainty type="Uncertainty" >
                     <precision type="int" >1000000</precision>
                     <uncertainty type="int" >0</uncertainty>
                    </uncertainty>
                   </item>
                   <item type="UncertainValue" >
                    <value type="float" >0.041000000000000009</value>
                    <uncertainty type="Uncertainty" >
                     <precision type="int" >1000000</precision>
                     <uncertainty type="int" >0</uncertainty>
                    </uncertainty>
                   </item>
                   <item type="UncertainValue" >
                    <value type="float" >-2.8889461083375822e-18</value>
                    <uncertainty type="Uncertainty" >
                     <precision type="int" >1000000</precision>
                     <uncertainty type="int" >0</uncertainty>
                    </uncertainty>
                   </item>
                   <item type="UncertainValue" >
                    <value type="float" >0.0057188520350166215</value>
                    <uncertainty type="Uncertainty" >
                     <precision type="int" >1000000</precision>
                     <uncertainty type="int" >0</uncertainty>
                    </uncertainty>
                   </item>
                   <item type="UncertainValue" >
                    <value type="float" >-2.8889461083375822e-18</value>
                    <uncertainty type="Uncertainty" >
                     <precision type="int" >1000000</precision>
                     <uncertainty type="int" >0</uncertainty>
                    </uncertainty>
                   </item>
                  </uvalues>
                  <type type="AtomicDisplacementParameters::Type" >
                   <enumerator type="int" >1</enumerator>
                  </type>
                  <u_equivalent type="float" >0.041000000000000002</u_equivalent>
                 </value>
                </adps>
               </value>
              </site>
              <annotations type="Annotations" >
               <annotations type="Container" >
                <count type="int" >1</count>
                <item type="Handle" >
                 <serial_number type="int" >203</serial_number>
                 <value type="FileOrdering" >
                  <value type="Handle" >
                   <serial_number type="int" >204</serial_number>
                   <value type="FileOrdering" >
                    <file_order type="int" >32</file_order>
                   </value>
                  </value>
                 </value>
                </item>
               </annotations>
              </annotations>
             </value>
            </item>
            <item type="Handle" >
             <serial_number type="int" >205</serial_number>
             <value type="Atom3d" >
              <element type="Element" >
               <code type="char" >1</code>
              </element>
              <formal_charge type="int" >0</formal_charge>
              <radius type="float" >0.68000000000000005</radius>
              <label type="string" >C14</label>
              <site type="Handle" >
               <serial_number type="int" >206</serial_number>
               <value type="Site" >
                <orthogonal type="Point" >
                 <coordinates type="Vector" >
                  <vector type="Container" >
                   <count type="int" >3</count>
                   <item type="float" >4.5741374491698403</item>
                   <item type="float" >1.7521640000000005</item>
                   <item type="float" >5.2588186159661943</item>
                  </vector>
                 </coordinates>
                </orthogonal>
                <fractional type="Point" >
                 <coordinates type="Vector" >
                  <vector type="Container" >
                   <count type="int" >3</count>
                   <item type="float" >0.51490999999999998</item>
                   <item type="float" >0.24399999999999999</item>
                   <item type="float" >0.22094</item>
                  </vector>
                 </coordinates>
                </fractional>
                <uncertain_value type="UncertainValue" >
                 <value type="float" >1</value>
                 <uncertainty type="Uncertainty" >
                  <precision type="int" >0</precision>
                  <uncertainty type="int" >0</uncertainty>
                 </uncertainty>
                </uncertain_value>
                <uncertainty type="Handle" >
                 <serial_number type="int" >207</serial_number>
                 <value type="Container" >
                  <count type="int" >3</count>
                  <item type="Uncertainty" >
                   <precision type="int" >5</precision>
                   <uncertainty type="int" >15</uncertainty>
                  </item>
                  <item type="Uncertainty" >
                   <precision type="int" >4</precision>
                   <uncertainty type="int" >2</uncertainty>
                  </item>
                  <item type="Uncertainty" >
                   <precision type="int" >5</precision>
                   <uncertainty type="int" >6</uncertainty>
                  </item>
                 </value>
                </uncertainty>
                <adps type="Handle" >
                 <serial_number type="int" >208</serial_number>
                 <value type="AtomicDisplacementParameters" >
                  <uvalues type="Container" >
                   <count type="int" >6</count>
                   <item type="UncertainValue" >
                    <value type="float" >0.0281</value>
                    <uncertainty type="Uncertainty" >
                     <precision type="int" >4</precision>
                     <uncertainty type="int" >8</uncertainty>
                    </uncertainty>
                   </item>
                   <item type="UncertainValue" >
                    <value type="float" >0.031099999999999999</value>
                    <uncertainty type="Uncertainty" >
                     <precision type="int" >4</precision>
                     <uncertainty type="int" >8</uncertainty>
                    </uncertainty>
                   </item>
                   <item type="UncertainValue" >
                    <value type="float" >0.0281</value>
                    <uncertainty type="Uncertainty" >
                     <precision type="int" >4</precision>
                     <uncertainty type="int" >7</uncertainty>
                    </uncertainty>
                   </item>
                   <item type="UncertainValue" >
                    <value type="float" >-0.0030999999999999999</value>
                    <uncertainty type="Uncertainty" >
                     <precision type="int" >4</precision>
                     <uncertainty type="int" >6</uncertainty>
                    </uncertainty>
                   </item>
                   <item type="UncertainValue" >
                    <value type="float" >0.0057999999999999996</value>
                    <uncertainty type="Uncertainty" >
                     <precision type="int" >4</precision>
                     <uncertainty type="int" >6</uncertainty>
                    </uncertainty>
                   </item>
                   <item type="UncertainValue" >
                    <value type="float" >-0.010699999999999999</value>
                    <uncertainty type="Uncertainty" >
                     <precision type="int" >4</precision>
                     <uncertainty type="int" >6</uncertainty>
                    </uncertainty>
                   </item>
                  </uvalues>
                  <type type="AtomicDisplacementParameters::Type" >
                   <enumerator type="int" >0</enumerator>
                  </type>
                  <u_equivalent type="float" >0.028921664189091301</u_equivalent>
                 </value>
                </adps>
               </value>
              </site>
              <annotations type="Annotations" >
               <annotations type="Container" >
                <count type="int" >1</count>
                <item type="Handle" >
                 <serial_number type="int" >209</serial_number>
                 <value type="FileOrdering" >
                  <value type="Handle" >
                   <serial_number type="int" >210</serial_number>
                   <value type="FileOrdering" >
                    <file_order type="int" >33</file_order>
                   </value>
                  </value>
                 </value>
                </item>
               </annotations>
              </annotations>
             </value>
            </item>
            <item type="Handle" >
             <serial_number type="int" >211</serial_number>
             <value type="Atom3d" >
              <element type="Element" >
               <code type="char" >1</code>
              </element>
              <formal_charge type="int" >0</formal_charge>
              <radius type="float" >0.68000000000000005</radius>
              <label type="string" >C15</label>
              <site type="Handle" >
               <serial_number type="int" >212</serial_number>
               <value type="Site" >
                <orthogonal type="Point" >
                 <coordinates type="Vector" >
                  <vector type="Container" >
                   <count type="int" >3</count>
                   <item type="float" >5.4159942660332483</item>
                   <item type="float" >1.1604496000000004</item>
                   <item type="float" >6.2078052106008101</item>
                  </vector>
                 </coordinates>
                </orthogonal>
                <fractional type="Point" >
                 <coordinates type="Vector" >
                  <vector type="Container" >
                   <count type="int" >3</count>
                   <item type="float" >0.60941999999999996</item>
                   <item type="float" >0.16159999999999999</item>
                   <item type="float" >0.26080999999999999</item>
                  </vector>
                 </coordinates>
                </fractional>
                <uncertain_value type="UncertainValue" >
                 <value type="float" >1</value>
                 <uncertainty type="Uncertainty" >
                  <precision type="int" >0</precision>
                  <uncertainty type="int" >0</uncertainty>
                 </uncertainty>
                </uncertain_value>
                <uncertainty type="Handle" >
                 <serial_number type="int" >213</serial_number>
                 <value type="Container" >
                  <count type="int" >3</count>
                  <item type="Uncertainty" >
                   <precision type="int" >5</precision>
                   <uncertainty type="int" >16</uncertainty>
                  </item>
                  <item type="Uncertainty" >
                   <precision type="int" >4</precision>
                   <uncertainty type="int" >2</uncertainty>
                  </item>
                  <item type="Uncertainty" >
                   <precision type="int" >5</precision>
                   <uncertainty type="int" >7</uncertainty>
                  </item>
                 </value>
                </uncertainty>
                <adps type="Handle" >
                 <serial_number type="int" >214</serial_number>
                 <value type="AtomicDisplacementParameters" >
                  <uvalues type="Container" >
                   <count type="int" >6</count>
                   <item type="UncertainValue" >
                    <value type="float" >0.030599999999999999</value>
                    <uncertainty type="Uncertainty" >
                     <precision type="int" >4</precision>
                     <uncertainty type="int" >8</uncertainty>
                    </uncertainty>
                   </item>
                   <item type="UncertainValue" >
                    <value type="float" >0.041099999999999998</value>
                    <uncertainty type="Uncertainty" >
                     <precision type="int" >4</precision>
                     <uncertainty type="int" >9</uncertainty>
                    </uncertainty>
                   </item>
                   <item type="UncertainValue" >
                    <value type="float" >0.031300000000000001</value>
                    <uncertainty type="Uncertainty" >
                     <precision type="int" >4</precision>
                     <uncertainty type="int" >8</uncertainty>
                    </uncertainty>
                   </item>
                   <item type="UncertainValue" >
                    <value type="float" >-0.0045999999999999999</value>
                    <uncertainty type="Uncertainty" >
                     <precision type="int" >4</precision>
                     <uncertainty type="int" >7</uncertainty>
                    </uncertainty>
                   </item>
                   <item type="UncertainValue" >
                    <value type="float" >0.00059999999999999995</value>
                    <uncertainty type="Uncertainty" >
                     <precision type="int" >4</precision>
                     <uncertainty type="int" >7</uncertainty>
                    </uncertainty>
                   </item>
                   <item type="UncertainValue" >
                    <value type="float" >-0.0114</value>
                    <uncertainty type="Uncertainty" >
                     <precision type="int" >4</precision>
                     <uncertainty type="int" >7</uncertainty>
                    </uncertainty>
                   </item>
                  </uvalues>
                  <type type="AtomicDisplacementParameters::Type" >
                   <enumerator type="int" >0</enumerator>
                  </type>
                  <u_equivalent type="float" >0.034685836756600918</u_equivalent>
                 </value>
                </adps>
               </value>
              </site>
              <annotations type="Annotations" >
               <annotations type="Container" >
                <count type="int" >1</count>
                <item type="Handle" >
                 <serial_number type="int" >215</serial_number>
                 <value type="FileOrdering" >
                  <value type="Handle" >
                   <serial_number type="int" >216</serial_number>
                   <value type="FileOrdering" >
                    <file_order type="int" >34</file_order>
                   </value>
                  </value>
                 </value>
                </item>
               </annotations>
              </annotations>
             </value>
            </item>
            <item type="Handle" >
             <serial_number type="int" >217</serial_number>
             <value type="Atom3d" >
              <element type="Element" >
               <code type="char" >2</code>
              </element>
              <formal_charge type="int" >0</formal_charge>
              <radius type="float" >0.23000000000000001</radius>
              <label type="string" >H15</label>
              <site type="Handle" >
               <serial_number type="int" >218</serial_number>
               <value type="Site" >
                <orthogonal type="Point" >
                 <coordinates type="Vector" >
                  <vector type="Container" >
                   <count type="int" >3</count>
                   <item type="float" >6.1633147675117144</item>
                   <item type="float" >1.6466033000000004</item>
                   <item type="float" >6.5360350861967813</item>
                  </vector>
                 </coordinates>
                </orthogonal>
                <fractional type="Point" >
                 <coordinates type="Vector" >
                  <vector type="Container" >
                   <count type="int" >3</count>
                   <item type="float" >0.68630000000000002</item>
                   <item type="float" >0.2293</item>
                   <item type="float" >0.27460000000000001</item>
                  </vector>
                 </coordinates>
                </fractional>
                <uncertain_value type="UncertainValue" >
                 <value type="float" >1</value>
                 <uncertainty type="Uncertainty" >
                  <precision type="int" >0</precision>
                  <uncertainty type="int" >0</uncertainty>
                 </uncertainty>
                </uncertain_value>
                <uncertainty type="Handle" >
                 <serial_number type="int" >219</serial_number>
                 <value type="Container" >
                  <count type="int" >3</count>
                  <item type="Uncertainty" >
                   <precision type="int" >4</precision>
                   <uncertainty type="int" >0</uncertainty>
                  </item>
                  <item type="Uncertainty" >
                   <precision type="int" >4</precision>
                   <uncertainty type="int" >0</uncertainty>
                  </item>
                  <item type="Uncertainty" >
                   <precision type="int" >4</precision>
                   <uncertainty type="int" >0</uncertainty>
                  </item>
                 </value>
                </uncertainty>
                <adps type="Handle" >
                 <serial_number type="int" >220</serial_number>
                 <value type="AtomicDisplacementParameters" >
                  <uvalues type="Container" >
                   <count type="int" >6</count>
                   <item type="UncertainValue" >
                    <value type="float" >0.041999999999999989</value>
                    <uncertainty type="Uncertainty" >
                     <precision type="int" >1000000</precision>
                     <uncertainty type="int" >0</uncertainty>
                    </uncertainty>
                   </item>
                   <item type="UncertainValue" >
                    <value type="float" >0.04200000000000001</value>
                    <uncertainty type="Uncertainty" >
                     <precision type="int" >1000000</precision>
                     <uncertainty type="int" >0</uncertainty>
                    </uncertainty>
                   </item>
                   <item type="UncertainValue" >
                    <value type="float" >0.04200000000000001</value>
                    <uncertainty type="Uncertainty" >
                     <precision type="int" >1000000</precision>
                     <uncertainty type="int" >0</uncertainty>
                    </uncertainty>
                   </item>
                   <item type="UncertainValue" >
                    <value type="float" >-2.9594082085409379e-18</value>
                    <uncertainty type="Uncertainty" >
                     <precision type="int" >1000000</precision>
                     <uncertainty type="int" >0</uncertainty>
                    </uncertainty>
                   </item>
                   <item type="UncertainValue" >
                    <value type="float" >0.0058583362309926361</value>
                    <uncertainty type="Uncertainty" >
                     <precision type="int" >1000000</precision>
                     <uncertainty type="int" >0</uncertainty>
                    </uncertainty>
                   </item>
                   <item type="UncertainValue" >
                    <value type="float" >-2.9594082085409379e-18</value>
                    <uncertainty type="Uncertainty" >
                     <precision type="int" >1000000</precision>
                     <uncertainty type="int" >0</uncertainty>
                    </uncertainty>
                   </item>
                  </uvalues>
                  <type type="AtomicDisplacementParameters::Type" >
                   <enumerator type="int" >1</enumerator>
                  </type>
                  <u_equivalent type="float" >0.042000000000000003</u_equivalent>
                 </value>
                </adps>
               </value>
              </site>
              <annotations type="Annotations" >
               <annotations type="Container" >
                <count type="int" >1</count>
                <item type="Handle" >
                 <serial_number type="int" >221</serial_number>
                 <value type="FileOrdering" >
                  <value type="Handle" >
                   <serial_number type="int" >222</serial_number>
                   <value type="FileOrdering" >
                    <file_order type="int" >35</file_order>
                   </value>
                  </value>
                 </value>
                </item>
               </annotations>
              </annotations>
             </value>
            </item>
            <item type="Handle" >
             <serial_number type="int" >223</serial_number>
             <value type="Atom3d" >
              <element type="Element" >
               <code type="char" >1</code>
              </element>
              <formal_charge type="int" >0</formal_charge>
              <radius type="float" >0.68000000000000005</radius>
              <label type="string" >C16</label>
              <site type="Handle" >
               <serial_number type="int" >224</serial_number>
               <value type="Site" >
                <orthogonal type="Point" >
                 <coordinates type="Vector" >
                  <vector type="Container" >
                   <count type="int" >3</count>
                   <item type="float" >5.1786689603291549</item>
                   <item type="float" >-0.11705029999999952</item>
                   <item type="float" >6.6769430530951235</item>
                  </vector>
                 </coordinates>
                </orthogonal>
                <fractional type="Point" >
                 <coordinates type="Vector" >
                  <vector type="Container" >
                   <count type="int" >3</count>
                   <item type="float" >0.59282999999999997</item>
                   <item type="float" >-0.016299999999999999</item>
                   <item type="float" >0.28051999999999999</item>
                  </vector>
                 </coordinates>
                </fractional>
                <uncertain_value type="UncertainValue" >
                 <value type="float" >1</value>
                 <uncertainty type="Uncertainty" >
                  <precision type="int" >0</precision>
                  <uncertainty type="int" >0</uncertainty>
                 </uncertainty>
                </uncertain_value>
                <uncertainty type="Handle" >
                 <serial_number type="int" >225</serial_number>
                 <value type="Container" >
                  <count type="int" >3</count>
                  <item type="Uncertainty" >
                   <precision type="int" >5</precision>
                   <uncertainty type="int" >16</uncertainty>
                  </item>
                  <item type="Uncertainty" >
                   <precision type="int" >4</precision>
                   <uncertainty type="int" >2</uncertainty>
                  </item>
                  <item type="Uncertainty" >
                   <precision type="int" >5</precision>
                   <uncertainty type="int" >6</uncertainty>
                  </item>
                 </value>
                </uncertainty>
                <adps type="Handle" >
                 <serial_number type="int" >226</serial_number>
                 <value type="AtomicDisplacementParameters" >
                  <uvalues type="Container" >
                   <count type="int" >6</count>
                   <item type="UncertainValue" >
                    <value type="float" >0.034099999999999998</value>
                    <uncertainty type="Uncertainty" >
                     <precision type="int" >4</precision>
                     <uncertainty type="int" >9</uncertainty>
                    </uncertainty>
                   </item>
                   <item type="UncertainValue" >
                    <value type="float" >0.045699999999999998</value>
                    <uncertainty type="Uncertainty" >
                     <precision type="int" >4</precision>
                     <uncertainty type="int" >10</uncertainty>
                    </uncertainty>
                   </item>
                   <item type="UncertainValue" >
                    <value type="float" >0.025499999999999998</value>
                    <uncertainty type="Uncertainty" >
                     <precision type="int" >4</precision>
                     <uncertainty type="int" >7</uncertainty>
                    </uncertainty>
                   </item>
                   <item type="UncertainValue" >
                    <value type="float" >0.002</value>
                    <uncertainty type="Uncertainty" >
                     <precision type="int" >4</precision>
                     <uncertainty type="int" >7</uncertainty>
                    </uncertainty>
                   </item>
                   <item type="UncertainValue" >
                    <value type="float" >0.00020000000000000001</value>
                    <uncertainty type="Uncertainty" >
                     <precision type="int" >4</precision>
                     <uncertainty type="int" >7</uncertainty>
                    </uncertainty>
                   </item>
                   <item type="UncertainValue" >
                    <value type="float" >-0.0033</value>
                    <uncertainty type="Uncertainty" >
                     <precision type="int" >4</precision>
                     <uncertainty type="int" >7</uncertainty>
                    </uncertainty>
                   </item>
                  </uvalues>
                  <type type="AtomicDisplacementParameters::Type" >
                   <enumerator type="int" >0</enumerator>
                  </type>
                  <u_equivalent type="float" >0.035475225134142814</u_equivalent>
                 </value>
                </adps>
               </value>
              </site>
              <annotations type="Annotations" >
               <annotations type="Container" >
                <count type="int" >1</count>
                <item type="Handle" >
                 <serial_number type="int" >227</serial_number>
                 <value type="FileOrdering" >
                  <value type="Handle" >
                   <serial_number type="int" >228</serial_number>
                   <value type="FileOrdering" >
                    <file_order type="int" >36</file_order>
                   </value>
                  </value>
                 </value>
                </item>
               </annotations>
              </annotations>
             </value>
            </item>
            <item type="Handle" >
             <serial_number type="int" >229</serial_number>
             <value type="Atom3d" >
              <element type="Element" >
               <code type="char" >2</code>
              </element>
              <formal_charge type="int" >0</formal_charge>
              <radius type="float" >0.23000000000000001</radius>
              <label type="string" >H16</label>
              <site type="Handle" >
               <serial_number type="int" >230</serial_number>
               <value type="Site" >
                <orthogonal type="Point" >
                 <coordinates type="Vector" >
                  <vector type="Container" >
                   <count type="int" >3</count>
                   <item type="float" >5.7650244522572907</item>
                   <item type="float" >-0.49907949999999957</item>
                   <item type="float" >7.3191215914257475</item>
                  </vector>
                 </coordinates>
                </orthogonal>
                <fractional type="Point" >
                 <coordinates type="Vector" >
                  <vector type="Container" >
                   <count type="int" >3</count>
                   <item type="float" >0.65839999999999999</item>
                   <item type="float" >-0.069500000000000006</item>
                   <item type="float" >0.3075</item>
                  </vector>
                 </coordinates>
                </fractional>
                <uncertain_value type="UncertainValue" >
                 <value type="float" >1</value>
                 <uncertainty type="Uncertainty" >
                  <precision type="int" >0</precision>
                  <uncertainty type="int" >0</uncertainty>
                 </uncertainty>
                </uncertain_value>
                <uncertainty type="Handle" >
                 <serial_number type="int" >231</serial_number>
                 <value type="Container" >
                  <count type="int" >3</count>
                  <item type="Uncertainty" >
                   <precision type="int" >4</precision>
                   <uncertainty type="int" >0</uncertainty>
                  </item>
                  <item type="Uncertainty" >
                   <precision type="int" >4</precision>
                   <uncertainty type="int" >0</uncertainty>
                  </item>
                  <item type="Uncertainty" >
                   <precision type="int" >4</precision>
                   <uncertainty type="int" >0</uncertainty>
                  </item>
                 </value>
                </uncertainty>
                <adps type="Handle" >
                 <serial_number type="int" >232</serial_number>
                 <value type="AtomicDisplacementParameters" >
                  <uvalues type="Container" >
                   <count type="int" >6</count>
                   <item type="UncertainValue" >
                    <value type="float" >0.04299999999999999</value>
                    <uncertainty type="Uncertainty" >
                     <precision type="int" >1000000</precision>
                     <uncertainty type="int" >0</uncertainty>
                    </uncertainty>
                   </item>
                   <item type="UncertainValue" >
                    <value type="float" >0.04300000000000001</value>
                    <uncertainty type="Uncertainty" >
                     <precision type="int" >1000000</precision>
                     <uncertainty type="int" >0</uncertainty>
                    </uncertainty>
                   </item>
                   <item type="UncertainValue" >
                    <value type="float" >0.043000000000000003</value>
                    <uncertainty type="Uncertainty" >
                     <precision type="int" >1000000</precision>
                     <uncertainty type="int" >0</uncertainty>
                    </uncertainty>
                   </item>
                   <item type="UncertainValue" >
                    <value type="float" >-3.0298703087442936e-18</value>
                    <uncertainty type="Uncertainty" >
                     <precision type="int" >1000000</precision>
                     <uncertainty type="int" >0</uncertainty>
                    </uncertainty>
                   </item>
                   <item type="UncertainValue" >
                    <value type="float" >0.0059978204269686506</value>
                    <uncertainty type="Uncertainty" >
                     <precision type="int" >1000000</precision>
                     <uncertainty type="int" >0</uncertainty>
                    </uncertainty>
                   </item>
                   <item type="UncertainValue" >
                    <value type="float" >-3.0298703087442932e-18</value>
                    <uncertainty type="Uncertainty" >
                     <precision type="int" >1000000</precision>
                     <uncertainty type="int" >0</uncertainty>
                    </uncertainty>
                   </item>
                  </uvalues>
                  <type type="AtomicDisplacementParameters::Type" >
                   <enumerator type="int" >1</enumerator>
                  </type>
                  <u_equivalent type="float" >0.042999999999999997</u_equivalent>
                 </value>
                </adps>
               </value>
              </site>
              <annotations type="Annotations" >
               <annotations type="Container" >
                <count type="int" >1</count>
                <item type="Handle" >
                 <serial_number type="int" >233</serial_number>
                 <value type="FileOrdering" >
                  <value type="Handle" >
                   <serial_number type="int" >234</serial_number>
                   <value type="FileOrdering" >
                    <file_order type="int" >37</file_order>
                   </value>
                  </value>
                 </value>
                </item>
               </annotations>
              </annotations>
             </value>
            </item>
            <item type="Handle" >
             <serial_number type="int" >235</serial_number>
             <value type="Atom3d" >
              <element type="Element" >
               <code type="char" >1</code>
              </element>
              <formal_charge type="int" >0</formal_charge>
              <radius type="float" >0.68000000000000005</radius>
              <label type="string" >C17</label>
              <site type="Handle" >
               <serial_number type="int" >236</serial_number>
               <value type="Site" >
                <orthogonal type="Point" >
                 <coordinates type="Vector" >
                  <vector type="Container" >
                   <count type="int" >3</count>
                   <item type="float" >4.0903043890181516</item>
                   <item type="float" >-0.8473579999999995</item>
                   <item type="float" >6.2168499787463114</item>
                  </vector>
                 </coordinates>
                </orthogonal>
                <fractional type="Point" >
                 <coordinates type="Vector" >
                  <vector type="Container" >
                   <count type="int" >3</count>
                   <item type="float" >0.48110999999999998</item>
                   <item type="float" >-0.11799999999999999</item>
                   <item type="float" >0.26118999999999998</item>
                  </vector>
                 </coordinates>
                </fractional>
                <uncertain_value type="UncertainValue" >
                 <value type="float" >1</value>
                 <uncertainty type="Uncertainty" >
                  <precision type="int" >0</precision>
                  <uncertainty type="int" >0</uncertainty>
                 </uncertainty>
                </uncertain_value>
                <uncertainty type="Handle" >
                 <serial_number type="int" >237</serial_number>
                 <value type="Container" >
                  <count type="int" >3</count>
                  <item type="Uncertainty" >
                   <precision type="int" >5</precision>
                   <uncertainty type="int" >16</uncertainty>
                  </item>
                  <item type="Uncertainty" >
                   <precision type="int" >4</precision>
                   <uncertainty type="int" >2</uncertainty>
                  </item>
                  <item type="Uncertainty" >
                   <precision type="int" >5</precision>
                   <uncertainty type="int" >6</uncertainty>
                  </item>
                 </value>
                </uncertainty>
                <adps type="Handle" >
                 <serial_number type="int" >238</serial_number>
                 <value type="AtomicDisplacementParameters" >
                  <uvalues type="Container" >
                   <count type="int" >6</count>
                   <item type="UncertainValue" >
                    <value type="float" >0.034799999999999998</value>
                    <uncertainty type="Uncertainty" >
                     <precision type="int" >4</precision>
                     <uncertainty type="int" >9</uncertainty>
                    </uncertainty>
                   </item>
                   <item type="UncertainValue" >
                    <value type="float" >0.035700000000000003</value>
                    <uncertainty type="Uncertainty" >
                     <precision type="int" >4</precision>
                     <uncertainty type="int" >8</uncertainty>
                    </uncertainty>
                   </item>
                   <item type="UncertainValue" >
                    <value type="float" >0.024</value>
                    <uncertainty type="Uncertainty" >
                     <precision type="int" >4</precision>
                     <uncertainty type="int" >7</uncertainty>
                    </uncertainty>
                   </item>
                   <item type="UncertainValue" >
                    <value type="float" >0.00040000000000000002</value>
                    <uncertainty type="Uncertainty" >
                     <precision type="int" >4</precision>
                     <uncertainty type="int" >7</uncertainty>
                    </uncertainty>
                   </item>
                   <item type="UncertainValue" >
                    <value type="float" >0.0054999999999999997</value>
                    <uncertainty type="Uncertainty" >
                     <precision type="int" >4</precision>
                     <uncertainty type="int" >6</uncertainty>
                    </uncertainty>
                   </item>
                   <item type="UncertainValue" >
                    <value type="float" >-0.00020000000000000001</value>
                    <uncertainty type="Uncertainty" >
                     <precision type="int" >4</precision>
                     <uncertainty type="int" >6</uncertainty>
                    </uncertainty>
                   </item>
                  </uvalues>
                  <type type="AtomicDisplacementParameters::Type" >
                   <enumerator type="int" >0</enumerator>
                  </type>
                  <u_equivalent type="float" >0.031367310851288542</u_equivalent>
                 </value>
                </adps>
               </value>
              </site>
              <annotations type="Annotations" >
               <annotations type="Container" >
                <count type="int" >1</count>
                <item type="Handle" >
                 <serial_number type="int" >239</serial_number>
                 <value type="FileOrdering" >
                  <value type="Handle" >
                   <serial_number type="int" >240</serial_number>
                   <value type="FileOrdering" >
                    <file_order type="int" >38</file_order>
                   </value>
                  </value>
                 </value>
                </item>
               </annotations>
              </annotations>
             </value>
            </item>
            <item type="Handle" >
             <serial_number type="int" >241</serial_number>
             <value type="Atom3d" >
              <element type="Element" >
               <code type="char" >2</code>
              </element>
              <formal_charge type="int" >0</formal_charge>
              <radius type="float" >0.23000000000000001</radius>
              <label type="string" >H17</label>
              <site type="Handle" >
               <serial_number type="int" >242</serial_number>
               <value type="Site" >
                <orthogonal type="Point" >
                 <coordinates type="Vector" >
                  <vector type="Container" >
                   <count type="int" >3</count>
                   <item type="float" >3.9427172893498468</item>
                   <item type="float" >-1.7284666999999996</item>
                   <item type="float" >6.5384152883403344</item>
                  </vector>
                 </coordinates>
                </orthogonal>
                <fractional type="Point" >
                 <coordinates type="Vector" >
                  <vector type="Container" >
                   <count type="int" >3</count>
                   <item type="float" >0.47120000000000001</item>
                   <item type="float" >-0.2407</item>
                   <item type="float" >0.2747</item>
                  </vector>
                 </coordinates>
                </fractional>
                <uncertain_value type="UncertainValue" >
                 <value type="float" >1</value>
                 <uncertainty type="Uncertainty" >
                  <precision type="int" >0</precision>
                  <uncertainty type="int" >0</uncertainty>
                 </uncertainty>
                </uncertain_value>
                <uncertainty type="Handle" >
                 <serial_number type="int" >243</serial_number>
                 <value type="Container" >
                  <count type="int" >3</count>
                  <item type="Uncertainty" >
                   <precision type="int" >4</precision>
                   <uncertainty type="int" >0</uncertainty>
                  </item>
                  <item type="Uncertainty" >
                   <precision type="int" >4</precision>
                   <uncertainty type="int" >0</uncertainty>
                  </item>
                  <item type="Uncertainty" >
                   <precision type="int" >4</precision>
                   <uncertainty type="int" >0</uncertainty>
                  </item>
                 </value>
                </uncertainty>
                <adps type="Handle" >
                 <serial_number type="int" >244</serial_number>
                 <value type="AtomicDisplacementParameters" >
                  <uvalues type="Container" >
                   <count type="int" >6</count>
                   <item type="UncertainValue" >
                    <value type="float" >0.037999999999999992</value>
                    <uncertainty type="Uncertainty" >
                     <precision type="int" >1000000</precision>
                     <uncertainty type="int" >0</uncertainty>
                    </uncertainty>
                   </item>
                   <item type="UncertainValue" >
                    <value type="float" >0.038000000000000006</value>
                    <uncertainty type="Uncertainty" >
                     <precision type="int" >1000000</precision>
                     <uncertainty type="int" >0</uncertainty>
                    </uncertainty>
                   </item>
                   <item type="UncertainValue" >
                    <value type="float" >0.037999999999999999</value>
                    <uncertainty type="Uncertainty" >
                     <precision type="int" >1000000</precision>
                     <uncertainty type="int" >0</uncertainty>
                    </uncertainty>
                   </item>
                   <item type="UncertainValue" >
                    <value type="float" >-2.6775598077275148e-18</value>
                    <uncertainty type="Uncertainty" >
                     <precision type="int" >1000000</precision>
                     <uncertainty type="int" >0</uncertainty>
                    </uncertainty>
                   </item>
                   <item type="UncertainValue" >
                    <value type="float" >0.0053003994470885753</value>
                    <uncertainty type="Uncertainty" >
                     <precision type="int" >1000000</precision>
                     <uncertainty type="int" >0</uncertainty>
                    </uncertainty>
                   </item>
                   <item type="UncertainValue" >
                    <value type="float" >-2.6775598077275148e-18</value>
                    <uncertainty type="Uncertainty" >
                     <precision type="int" >1000000</precision>
                     <uncertainty type="int" >0</uncertainty>
                    </uncertainty>
                   </item>
                  </uvalues>
                  <type type="AtomicDisplacementParameters::Type" >
                   <enumerator type="int" >1</enumerator>
                  </type>
                  <u_equivalent type="float" >0.037999999999999999</u_equivalent>
                 </value>
                </adps>
               </value>
              </site>
              <annotations type="Annotations" >
               <annotations type="Container" >
                <count type="int" >1</count>
                <item type="Handle" >
                 <serial_number type="int" >245</serial_number>
                 <value type="FileOrdering" >
                  <value type="Handle" >
                   <serial_number type="int" >246</serial_number>
                   <value type="FileOrdering" >
                    <file_order type="int" >39</file_order>
                   </value>
                  </value>
                 </value>
                </item>
               </annotations>
              </annotations>
             </value>
            </item>
            <item type="Handle" >
             <serial_number type="int" >247</serial_number>
             <value type="Atom3d" >
              <element type="Element" >
               <code type="char" >1</code>
              </element>
              <formal_charge type="int" >0</formal_charge>
              <radius type="float" >0.68000000000000005</radius>
              <label type="string" >C18</label>
              <site type="Handle" >
               <serial_number type="int" >248</serial_number>
               <value type="Site" >
                <orthogonal type="Point" >
                 <coordinates type="Vector" >
                  <vector type="Container" >
                   <count type="int" >3</count>
                   <item type="float" >3.2097901666320983</item>
                   <item type="float" >-0.29298479999999966</item>
                   <item type="float" >5.2814305363299487</item>
                  </vector>
                 </coordinates>
                </orthogonal>
                <fractional type="Point" >
                 <coordinates type="Vector" >
                  <vector type="Container" >
                   <count type="int" >3</count>
                   <item type="float" >0.38303999999999999</item>
                   <item type="float" >-0.040800000000000003</item>
                   <item type="float" >0.22189</item>
                  </vector>
                 </coordinates>
                </fractional>
                <uncertain_value type="UncertainValue" >
                 <value type="float" >1</value>
                 <uncertainty type="Uncertainty" >
                  <precision type="int" >0</precision>
                  <uncertainty type="int" >0</uncertainty>
                 </uncertainty>
                </uncertain_value>
                <uncertainty type="Handle" >
                 <serial_number type="int" >249</serial_number>
                 <value type="Container" >
                  <count type="int" >3</count>
                  <item type="Uncertainty" >
                   <precision type="int" >5</precision>
                   <uncertainty type="int" >15</uncertainty>
                  </item>
                  <item type="Uncertainty" >
                   <precision type="int" >4</precision>
                   <uncertainty type="int" >2</uncertainty>
                  </item>
                  <item type="Uncertainty" >
                   <precision type="int" >5</precision>
                   <uncertainty type="int" >6</uncertainty>
                  </item>
                 </value>
                </uncertainty>
                <adps type="Handle" >
                 <serial_number type="int" >250</serial_number>
                 <value type="AtomicDisplacementParameters" >
                  <uvalues type="Container" >
                   <count type="int" >6</count>
                   <item type="UncertainValue" >
                    <value type="float" >0.029399999999999999</value>
                    <uncertainty type="Uncertainty" >
                     <precision type="int" >4</precision>
                     <uncertainty type="int" >8</uncertainty>
                    </uncertainty>
                   </item>
                   <item type="UncertainValue" >
                    <value type="float" >0.0293</value>
                    <uncertainty type="Uncertainty" >
                     <precision type="int" >4</precision>
                     <uncertainty type="int" >8</uncertainty>
                    </uncertainty>
                   </item>
                   <item type="UncertainValue" >
                    <value type="float" >0.022100000000000002</value>
                    <uncertainty type="Uncertainty" >
                     <precision type="int" >4</precision>
                     <uncertainty type="int" >7</uncertainty>
                    </uncertainty>
                   </item>
                   <item type="UncertainValue" >
                    <value type="float" >-0.00029999999999999997</value>
                    <uncertainty type="Uncertainty" >
                     <precision type="int" >4</precision>
                     <uncertainty type="int" >6</uncertainty>
                    </uncertainty>
                   </item>
                   <item type="UncertainValue" >
                    <value type="float" >0.0083000000000000001</value>
                    <uncertainty type="Uncertainty" >
                     <precision type="int" >4</precision>
                     <uncertainty type="int" >6</uncertainty>
                    </uncertainty>
                   </item>
                   <item type="UncertainValue" >
                    <value type="float" >-0.0035000000000000001</value>
                    <uncertainty type="Uncertainty" >
                     <precision type="int" >4</precision>
                     <uncertainty type="int" >6</uncertainty>
                    </uncertainty>
                   </item>
                  </uvalues>
                  <type type="AtomicDisplacementParameters::Type" >
                   <enumerator type="int" >0</enumerator>
                  </type>
                  <u_equivalent type="float" >0.026486825533453679</u_equivalent>
                 </value>
                </adps>
               </value>
              </site>
              <annotations type="Annotations" >
               <annotations type="Container" >
                <count type="int" >1</count>
                <item type="Handle" >
                 <serial_number type="int" >251</serial_number>
                 <value type="FileOrdering" >
                  <value type="Handle" >
                   <serial_number type="int" >252</serial_number>
                   <value type="FileOrdering" >
                    <file_order type="int" >40</file_order>
                   </value>
                  </value>
                 </value>
                </item>
               </annotations>
              </annotations>
             </value>
            </item>
            <item type="Handle" >
             <serial_number type="int" >253</serial_number>
             <value type="Atom3d" >
              <element type="Element" >
               <code type="char" >1</code>
              </element>
              <formal_charge type="int" >0</formal_charge>
              <radius type="float" >0.68000000000000005</radius>
              <label type="string" >C19</label>
              <site type="Handle" >
               <serial_number type="int" >254</serial_number>
               <value type="Site" >
                <orthogonal type="Point" >
                 <coordinates type="Vector" >
                  <vector type="Container" >
                   <count type="int" >3</count>
                   <item type="float" >2.054091132799849</item>
                   <item type="float" >-0.99744089999999963</item>
                   <item type="float" >4.8025338650470673</item>
                  </vector>
                 </coordinates>
                </orthogonal>
                <fractional type="Point" >
                 <coordinates type="Vector" >
                  <vector type="Container" >
                   <count type="int" >3</count>
                   <item type="float" >0.26454</item>
                   <item type="float" >-0.1389</item>
                   <item type="float" >0.20177</item>
                  </vector>
                 </coordinates>
                </fractional>
                <uncertain_value type="UncertainValue" >
                 <value type="float" >1</value>
                 <uncertainty type="Uncertainty" >
                  <precision type="int" >0</precision>
                  <uncertainty type="int" >0</uncertainty>
                 </uncertainty>
                </uncertain_value>
                <uncertainty type="Handle" >
                 <serial_number type="int" >255</serial_number>
                 <value type="Container" >
                  <count type="int" >3</count>
                  <item type="Uncertainty" >
                   <precision type="int" >5</precision>
                   <uncertainty type="int" >14</uncertainty>
                  </item>
                  <item type="Uncertainty" >
                   <precision type="int" >4</precision>
                   <uncertainty type="int" >2</uncertainty>
                  </item>
                  <item type="Uncertainty" >
                   <precision type="int" >5</precision>
                   <uncertainty type="int" >6</uncertainty>
                  </item>
                 </value>
                </uncertainty>
                <adps type="Handle" >
                 <serial_number type="int" >256</serial_number>
                 <value type="AtomicDisplacementParameters" >
                  <uvalues type="Container" >
                   <count type="int" >6</count>
                   <item type="UncertainValue" >
                    <value type="float" >0.0309</value>
                    <uncertainty type="Uncertainty" >
                     <precision type="int" >4</precision>
                     <uncertainty type="int" >8</uncertainty>
                    </uncertainty>
                   </item>
                   <item type="UncertainValue" >
                    <value type="float" >0.025600000000000001</value>
                    <uncertainty type="Uncertainty" >
                     <precision type="int" >4</precision>
                     <uncertainty type="int" >7</uncertainty>
                    </uncertainty>
                   </item>
                   <item type="UncertainValue" >
                    <value type="float" >0.025999999999999999</value>
                    <uncertainty type="Uncertainty" >
                     <precision type="int" >4</precision>
                     <uncertainty type="int" >7</uncertainty>
                    </uncertainty>
                   </item>
                   <item type="UncertainValue" >
                    <value type="float" >-0.0019</value>
                    <uncertainty type="Uncertainty" >
                     <precision type="int" >4</precision>
                     <uncertainty type="int" >6</uncertainty>
                    </uncertainty>
                   </item>
                   <item type="UncertainValue" >
                    <value type="float" >0.0083999999999999995</value>
                    <uncertainty type="Uncertainty" >
                     <precision type="int" >4</precision>
                     <uncertainty type="int" >6</uncertainty>
                    </uncertainty>
                   </item>
                   <item type="UncertainValue" >
                    <value type="float" >0.00080000000000000004</value>
                    <uncertainty type="Uncertainty" >
                     <precision type="int" >4</precision>
                     <uncertainty type="int" >6</uncertainty>
                    </uncertainty>
                   </item>
                  </uvalues>
                  <type type="AtomicDisplacementParameters::Type" >
                   <enumerator type="int" >0</enumerator>
                  </type>
                  <u_equivalent type="float" >0.027079724131678289</u_equivalent>
                 </value>
                </adps>
               </value>
              </site>
              <annotations type="Annotations" >
               <annotations type="Container" >
                <count type="int" >1</count>
                <item type="Handle" >
                 <serial_number type="int" >257</serial_number>
                 <value type="FileOrdering" >
                  <value type="Handle" >
                   <serial_number type="int" >258</serial_number>
                   <value type="FileOrdering" >
                    <file_order type="int" >41</file_order>
                   </value>
                  </value>
                 </value>
                </item>
               </annotations>
              </annotations>
             </value>
            </item>
            <item type="Handle" >
             <serial_number type="int" >259</serial_number>
             <value type="Atom3d" >
              <element type="Element" >
               <code type="char" >2</code>
              </element>
              <formal_charge type="int" >0</formal_charge>
              <radius type="float" >0.23000000000000001</radius>
              <label type="string" >H19</label>
              <site type="Handle" >
               <serial_number type="int" >260</serial_number>
               <value type="Site" >
                <orthogonal type="Point" >
                 <coordinates type="Vector" >
                  <vector type="Container" >
                   <count type="int" >3</count>
                   <item type="float" >1.8953909427941107</item>
                   <item type="float" >-1.8835762999999994</item>
                   <item type="float" >5.105533597921375</item>
                  </vector>
                 </coordinates>
                </orthogonal>
                <fractional type="Point" >
                 <coordinates type="Vector" >
                  <vector type="Container" >
                   <count type="int" >3</count>
                   <item type="float" >0.25330000000000003</item>
                   <item type="float" >-0.26229999999999998</item>
                   <item type="float" >0.2145</item>
                  </vector>
                 </coordinates>
                </fractional>
                <uncertain_value type="UncertainValue" >
                 <value type="float" >1</value>
                 <uncertainty type="Uncertainty" >
                  <precision type="int" >0</precision>
                  <uncertainty type="int" >0</uncertainty>
                 </uncertainty>
                </uncertain_value>
                <uncertainty type="Handle" >
                 <serial_number type="int" >261</serial_number>
                 <value type="Container" >
                  <count type="int" >3</count>
                  <item type="Uncertainty" >
                   <precision type="int" >4</precision>
                   <uncertainty type="int" >0</uncertainty>
                  </item>
                  <item type="Uncertainty" >
                   <precision type="int" >4</precision>
                   <uncertainty type="int" >0</uncertainty>
                  </item>
                  <item type="Uncertainty" >
                   <precision type="int" >4</precision>
                   <uncertainty type="int" >0</uncertainty>
                  </item>
                 </value>
                </uncertainty>
                <adps type="Handle" >
                 <serial_number type="int" >262</serial_number>
                 <value type="AtomicDisplacementParameters" >
                  <uvalues type="Container" >
                   <count type="int" >6</count>
                   <item type="UncertainValue" >
                    <value type="float" >0.031999999999999994</value>
                    <uncertainty type="Uncertainty" >
                     <precision type="int" >1000000</precision>
                     <uncertainty type="int" >0</uncertainty>
                    </uncertainty>
                   </item>
                   <item type="UncertainValue" >
                    <value type="float" >0.032000000000000008</value>
                    <uncertainty type="Uncertainty" >
                     <precision type="int" >1000000</precision>
                     <uncertainty type="int" >0</uncertainty>
                    </uncertainty>
                   </item>
                   <item type="UncertainValue" >
                    <value type="float" >0.032000000000000008</value>
                    <uncertainty type="Uncertainty" >
                     <precision type="int" >1000000</precision>
                     <uncertainty type="int" >0</uncertainty>
                    </uncertainty>
                   </item>
                   <item type="UncertainValue" >
                    <value type="float" >-2.254787206507381e-18</value>
                    <uncertainty type="Uncertainty" >
                     <precision type="int" >1000000</precision>
                     <uncertainty type="int" >0</uncertainty>
                    </uncertainty>
                   </item>
                   <item type="UncertainValue" >
                    <value type="float" >0.0044634942712324837</value>
                    <uncertainty type="Uncertainty" >
                     <precision type="int" >1000000</precision>
                     <uncertainty type="int" >0</uncertainty>
                    </uncertainty>
                   </item>
                   <item type="UncertainValue" >
                    <value type="float" >-2.254787206507381e-18</value>
                    <uncertainty type="Uncertainty" >
                     <precision type="int" >1000000</precision>
                     <uncertainty type="int" >0</uncertainty>
                    </uncertainty>
                   </item>
                  </uvalues>
                  <type type="AtomicDisplacementParameters::Type" >
                   <enumerator type="int" >1</enumerator>
                  </type>
                  <u_equivalent type="float" >0.032000000000000001</u_equivalent>
                 </value>
                </adps>
               </value>
              </site>
              <annotations type="Annotations" >
               <annotations type="Container" >
                <count type="int" >1</count>
                <item type="Handle" >
                 <serial_number type="int" >263</serial_number>
                 <value type="FileOrdering" >
                  <value type="Handle" >
                   <serial_number type="int" >264</serial_number>
                   <value type="FileOrdering" >
                    <file_order type="int" >42</file_order>
                   </value>
                  </value>
                 </value>
                </item>
               </annotations>
              </annotations>
             </value>
            </item>
            <item type="Handle" >
             <serial_number type="int" >265</serial_number>
             <value type="Atom3d" >
              <element type="Element" >
               <code type="char" >1</code>
              </element>
              <formal_charge type="int" >0</formal_charge>
              <radius type="float" >0.68000000000000005</radius>
              <label type="string" >C20</label>
              <site type="Handle" >
               <serial_number type="int" >266</serial_number>
               <value type="Site" >
                <orthogonal type="Point" >
                 <coordinates type="Vector" >
                  <vector type="Container" >
                   <count type="int" >3</count>
                   <item type="float" >1.1846161356757452</item>
                   <item type="float" >-0.43588669999999968</item>
                   <item type="float" >3.9309038400779257</item>
                  </vector>
                 </coordinates>
                </orthogonal>
                <fractional type="Point" >
                 <coordinates type="Vector" >
                  <vector type="Container" >
                   <count type="int" >3</count>
                   <item type="float" >0.16841</item>
                   <item type="float" >-0.060699999999999997</item>
                   <item type="float" >0.16514999999999999</item>
                  </vector>
                 </coordinates>
                </fractional>
                <uncertain_value type="UncertainValue" >
                 <value type="float" >1</value>
                 <uncertainty type="Uncertainty" >
                  <precision type="int" >0</precision>
                  <uncertainty type="int" >0</uncertainty>
                 </uncertainty>
                </uncertain_value>
                <uncertainty type="Handle" >
                 <serial_number type="int" >267</serial_number>
                 <value type="Container" >
                  <count type="int" >3</count>
                  <item type="Uncertainty" >
                   <precision type="int" >5</precision>
                   <uncertainty type="int" >15</uncertainty>
                  </item>
                  <item type="Uncertainty" >
                   <precision type="int" >4</precision>
                   <uncertainty type="int" >2</uncertainty>
                  </item>
                  <item type="Uncertainty" >
                   <precision type="int" >5</precision>
                   <uncertainty type="int" >6</uncertainty>
                  </item>
                 </value>
                </uncertainty>
                <adps type="Handle" >
                 <serial_number type="int" >268</serial_number>
                 <value type="AtomicDisplacementParameters" >
                  <uvalues type="Container" >
                   <count type="int" >6</count>
                   <item type="UncertainValue" >
                    <value type="float" >0.028299999999999999</value>
                    <uncertainty type="Uncertainty" >
                     <precision type="int" >4</precision>
                     <uncertainty type="int" >8</uncertainty>
                    </uncertainty>
                   </item>
                   <item type="UncertainValue" >
                    <value type="float" >0.0258</value>
                    <uncertainty type="Uncertainty" >
                     <precision type="int" >4</precision>
                     <uncertainty type="int" >7</uncertainty>
                    </uncertainty>
                   </item>
                   <item type="UncertainValue" >
                    <value type="float" >0.0286</value>
                    <uncertainty type="Uncertainty" >
                     <precision type="int" >4</precision>
                     <uncertainty type="int" >7</uncertainty>
                    </uncertainty>
                   </item>
                   <item type="UncertainValue" >
                    <value type="float" >-0.0053</value>
                    <uncertainty type="Uncertainty" >
                     <precision type="int" >4</precision>
                     <uncertainty type="int" >6</uncertainty>
                    </uncertainty>
                   </item>
                   <item type="UncertainValue" >
                    <value type="float" >0.0076</value>
                    <uncertainty type="Uncertainty" >
                     <precision type="int" >4</precision>
                     <uncertainty type="int" >6</uncertainty>
                    </uncertainty>
                   </item>
                   <item type="UncertainValue" >
                    <value type="float" >-0.0020999999999999999</value>
                    <uncertainty type="Uncertainty" >
                     <precision type="int" >4</precision>
                     <uncertainty type="int" >6</uncertainty>
                    </uncertainty>
                   </item>
                  </uvalues>
                  <type type="AtomicDisplacementParameters::Type" >
                   <enumerator type="int" >0</enumerator>
                  </type>
                  <u_equivalent type="float" >0.027222258438265978</u_equivalent>
                 </value>
                </adps>
               </value>
              </site>
              <annotations type="Annotations" >
               <annotations type="Container" >
                <count type="int" >1</count>
                <item type="Handle" >
                 <serial_number type="int" >269</serial_number>
                 <value type="FileOrdering" >
                  <value type="Handle" >
                   <serial_number type="int" >270</serial_number>
                   <value type="FileOrdering" >
                    <file_order type="int" >43</file_order>
                   </value>
                  </value>
                 </value>
                </item>
               </annotations>
              </annotations>
             </value>
            </item>
            <item type="Handle" >
             <serial_number type="int" >271</serial_number>
             <value type="Atom3d" >
              <element type="Element" >
               <code type="char" >2</code>
              </element>
              <formal_charge type="int" >0</formal_charge>
              <radius type="float" >0.23000000000000001</radius>
              <label type="string" >H20</label>
              <site type="Handle" >
               <serial_number type="int" >272</serial_number>
               <value type="Site" >
                <orthogonal type="Point" >
                 <coordinates type="Vector" >
                  <vector type="Container" >
                   <count type="int" >3</count>
                   <item type="float" >0.42292089969518187</item>
                   <item type="float" >-0.93065759999999975</item>
                   <item type="float" >3.651230088210438</item>
                  </vector>
                 </coordinates>
                </orthogonal>
                <fractional type="Point" >
                 <coordinates type="Vector" >
                  <vector type="Container" >
                   <count type="int" >3</count>
                   <item type="float" >0.090800000000000006</item>
                   <item type="float" >-0.12959999999999999</item>
                   <item type="float" >0.15340000000000001</item>
                  </vector>
                 </coordinates>
                </fractional>
                <uncertain_value type="UncertainValue" >
                 <value type="float" >1</value>
                 <uncertainty type="Uncertainty" >
                  <precision type="int" >0</precision>
                  <uncertainty type="int" >0</uncertainty>
                 </uncertainty>
                </uncertain_value>
                <uncertainty type="Handle" >
                 <serial_number type="int" >273</serial_number>
                 <value type="Container" >
                  <count type="int" >3</count>
                  <item type="Uncertainty" >
                   <precision type="int" >4</precision>
                   <uncertainty type="int" >0</uncertainty>
                  </item>
                  <item type="Uncertainty" >
                   <precision type="int" >4</precision>
                   <uncertainty type="int" >0</uncertainty>
                  </item>
                  <item type="Uncertainty" >
                   <precision type="int" >4</precision>
                   <uncertainty type="int" >0</uncertainty>
                  </item>
                 </value>
                </uncertainty>
                <adps type="Handle" >
                 <serial_number type="int" >274</serial_number>
                 <value type="AtomicDisplacementParameters" >
                  <uvalues type="Container" >
                   <count type="int" >6</count>
                   <item type="UncertainValue" >
                    <value type="float" >0.032999999999999995</value>
                    <uncertainty type="Uncertainty" >
                     <precision type="int" >1000000</precision>
                     <uncertainty type="int" >0</uncertainty>
                    </uncertainty>
                   </item>
                   <item type="UncertainValue" >
                    <value type="float" >0.033000000000000008</value>
                    <uncertainty type="Uncertainty" >
                     <precision type="int" >1000000</precision>
                     <uncertainty type="int" >0</uncertainty>
                    </uncertainty>
                   </item>
                   <item type="UncertainValue" >
                    <value type="float" >0.033000000000000008</value>
                    <uncertainty type="Uncertainty" >
                     <precision type="int" >1000000</precision>
                     <uncertainty type="int" >0</uncertainty>
                    </uncertainty>
                   </item>
                   <item type="UncertainValue" >
                    <value type="float" >-2.3252493067107367e-18</value>
                    <uncertainty type="Uncertainty" >
                     <precision type="int" >1000000</precision>
                     <uncertainty type="int" >0</uncertainty>
                    </uncertainty>
                   </item>
                   <item type="UncertainValue" >
                    <value type="float" >0.0046029784672084999</value>
                    <uncertainty type="Uncertainty" >
                     <precision type="int" >1000000</precision>
                     <uncertainty type="int" >0</uncertainty>
                    </uncertainty>
                   </item>
                   <item type="UncertainValue" >
                    <value type="float" >-2.3252493067107367e-18</value>
                    <uncertainty type="Uncertainty" >
                     <precision type="int" >1000000</precision>
                     <uncertainty type="int" >0</uncertainty>
                    </uncertainty>
                   </item>
                  </uvalues>
                  <type type="AtomicDisplacementParameters::Type" >
                   <enumerator type="int" >1</enumerator>
                  </type>
                  <u_equivalent type="float" >0.033000000000000002</u_equivalent>
                 </value>
                </adps>
               </value>
              </site>
              <annotations type="Annotations" >
               <annotations type="Container" >
                <count type="int" >1</count>
                <item type="Handle" >
                 <serial_number type="int" >275</serial_number>
                 <value type="FileOrdering" >
                  <value type="Handle" >
                   <serial_number type="int" >276</serial_number>
                   <value type="FileOrdering" >
                    <file_order type="int" >44</file_order>
                   </value>
                  </value>
                 </value>
                </item>
               </annotations>
              </annotations>
             </value>
            </item>
            <item type="Handle" >
             <serial_number type="int" >277</serial_number>
             <value type="Atom3d" >
              <element type="Element" >
               <code type="char" >1</code>
              </element>
              <formal_charge type="int" >0</formal_charge>
              <radius type="float" >0.68000000000000005</radius>
              <label type="string" >C21</label>
              <site type="Handle" >
               <serial_number type="int" >278</serial_number>
               <value type="Site" >
                <orthogonal type="Point" >
                 <coordinates type="Vector" >
                  <vector type="Container" >
                   <count type="int" >3</count>
                   <item type="float" >1.3874754073743882</item>
                   <item type="float" >0.89475260000000023</item>
                   <item type="float" >3.4177322579278799</item>
                  </vector>
                 </coordinates>
                </orthogonal>
                <fractional type="Point" >
                 <coordinates type="Vector" >
                  <vector type="Container" >
                   <count type="int" >3</count>
                   <item type="float" >0.18106</item>
                   <item type="float" >0.1246</item>
                   <item type="float" >0.14359</item>
                  </vector>
                 </coordinates>
                </fractional>
                <uncertain_value type="UncertainValue" >
                 <value type="float" >1</value>
                 <uncertainty type="Uncertainty" >
                  <precision type="int" >0</precision>
                  <uncertainty type="int" >0</uncertainty>
                 </uncertainty>
                </uncertain_value>
                <uncertainty type="Handle" >
                 <serial_number type="int" >279</serial_number>
                 <value type="Container" >
                  <count type="int" >3</count>
                  <item type="Uncertainty" >
                   <precision type="int" >5</precision>
                   <uncertainty type="int" >14</uncertainty>
                  </item>
                  <item type="Uncertainty" >
                   <precision type="int" >4</precision>
                   <uncertainty type="int" >2</uncertainty>
                  </item>
                  <item type="Uncertainty" >
                   <precision type="int" >5</precision>
                   <uncertainty type="int" >6</uncertainty>
                  </item>
                 </value>
                </uncertainty>
                <adps type="Handle" >
                 <serial_number type="int" >280</serial_number>
                 <value type="AtomicDisplacementParameters" >
                  <uvalues type="Container" >
                   <count type="int" >6</count>
                   <item type="UncertainValue" >
                    <value type="float" >0.027799999999999998</value>
                    <uncertainty type="Uncertainty" >
                     <precision type="int" >4</precision>
                     <uncertainty type="int" >7</uncertainty>
                    </uncertainty>
                   </item>
                   <item type="UncertainValue" >
                    <value type="float" >0.023400000000000001</value>
                    <uncertainty type="Uncertainty" >
                     <precision type="int" >4</precision>
                     <uncertainty type="int" >7</uncertainty>
                    </uncertainty>
                   </item>
                   <item type="UncertainValue" >
                    <value type="float" >0.021299999999999999</value>
                    <uncertainty type="Uncertainty" >
                     <precision type="int" >4</precision>
                     <uncertainty type="int" >6</uncertainty>
                    </uncertainty>
                   </item>
                   <item type="UncertainValue" >
                    <value type="float" >-0.0020999999999999999</value>
                    <uncertainty type="Uncertainty" >
                     <precision type="int" >4</precision>
                     <uncertainty type="int" >6</uncertainty>
                    </uncertainty>
                   </item>
                   <item type="UncertainValue" >
                    <value type="float" >0.0070000000000000001</value>
                    <uncertainty type="Uncertainty" >
                     <precision type="int" >4</precision>
                     <uncertainty type="int" >6</uncertainty>
                    </uncertainty>
                   </item>
                   <item type="UncertainValue" >
                    <value type="float" >-0.0041000000000000003</value>
                    <uncertainty type="Uncertainty" >
                     <precision type="int" >4</precision>
                     <uncertainty type="int" >6</uncertainty>
                    </uncertainty>
                   </item>
                  </uvalues>
                  <type type="AtomicDisplacementParameters::Type" >
                   <enumerator type="int" >0</enumerator>
                  </type>
                  <u_equivalent type="float" >0.023827570276526207</u_equivalent>
                 </value>
                </adps>
               </value>
              </site>
              <annotations type="Annotations" >
               <annotations type="Container" >
                <count type="int" >1</count>
                <item type="Handle" >
                 <serial_number type="int" >281</serial_number>
                 <value type="FileOrdering" >
                  <value type="Handle" >
                   <serial_number type="int" >282</serial_number>
                   <value type="FileOrdering" >
                    <file_order type="int" >45</file_order>
                   </value>
                  </value>
                 </value>
                </item>
               </annotations>
              </annotations>
             </value>
            </item>
            <item type="Handle" >
             <serial_number type="int" >283</serial_number>
             <value type="Atom3d" >
              <element type="Element" >
               <code type="char" >1</code>
              </element>
              <formal_charge type="int" >0</formal_charge>
              <radius type="float" >0.68000000000000005</radius>
              <label type="string" >C22</label>
              <site type="Handle" >
               <serial_number type="int" >284</serial_number>
               <value type="Site" >
                <orthogonal type="Point" >
                 <coordinates type="Vector" >
                  <vector type="Container" >
                   <count type="int" >3</count>
                   <item type="float" >2.5566220849076453</item>
                   <item type="float" >1.6006449</item>
                   <item type="float" >3.8392660575511317</item>
                  </vector>
                 </coordinates>
                </orthogonal>
                <fractional type="Point" >
                 <coordinates type="Vector" >
                  <vector type="Container" >
                   <count type="int" >3</count>
                   <item type="float" >0.30008000000000001</item>
                   <item type="float" >0.22289999999999999</item>
                   <item type="float" >0.1613</item>
                  </vector>
                 </coordinates>
                </fractional>
                <uncertain_value type="UncertainValue" >
                 <value type="float" >1</value>
                 <uncertainty type="Uncertainty" >
                  <precision type="int" >0</precision>
                  <uncertainty type="int" >0</uncertainty>
                 </uncertainty>
                </uncertain_value>
                <uncertainty type="Handle" >
                 <serial_number type="int" >285</serial_number>
                 <value type="Container" >
                  <count type="int" >3</count>
                  <item type="Uncertainty" >
                   <precision type="int" >5</precision>
                   <uncertainty type="int" >14</uncertainty>
                  </item>
                  <item type="Uncertainty" >
                   <precision type="int" >4</precision>
                   <uncertainty type="int" >2</uncertainty>
                  </item>
                  <item type="Uncertainty" >
                   <precision type="int" >5</precision>
                   <uncertainty type="int" >6</uncertainty>
                  </item>
                 </value>
                </uncertainty>
                <adps type="Handle" >
                 <serial_number type="int" >286</serial_number>
                 <value type="AtomicDisplacementParameters" >
                  <uvalues type="Container" >
                   <count type="int" >6</count>
                   <item type="UncertainValue" >
                    <value type="float" >0.027300000000000001</value>
                    <uncertainty type="Uncertainty" >
                     <precision type="int" >4</precision>
                     <uncertainty type="int" >8</uncertainty>
                    </uncertainty>
                   </item>
                   <item type="UncertainValue" >
                    <value type="float" >0.0241</value>
                    <uncertainty type="Uncertainty" >
                     <precision type="int" >4</precision>
                     <uncertainty type="int" >7</uncertainty>
                    </uncertainty>
                   </item>
                   <item type="UncertainValue" >
                    <value type="float" >0.023699999999999999</value>
                    <uncertainty type="Uncertainty" >
                     <precision type="int" >4</precision>
                     <uncertainty type="int" >7</uncertainty>
                    </uncertainty>
                   </item>
                   <item type="UncertainValue" >
                    <value type="float" >-0.0018</value>
                    <uncertainty type="Uncertainty" >
                     <precision type="int" >4</precision>
                     <uncertainty type="int" >6</uncertainty>
                    </uncertainty>
                   </item>
                   <item type="UncertainValue" >
                    <value type="float" >0.0077999999999999996</value>
                    <uncertainty type="Uncertainty" >
                     <precision type="int" >4</precision>
                     <uncertainty type="int" >6</uncertainty>
                    </uncertainty>
                   </item>
                   <item type="UncertainValue" >
                    <value type="float" >-0.0058999999999999999</value>
                    <uncertainty type="Uncertainty" >
                     <precision type="int" >4</precision>
                     <uncertainty type="int" >6</uncertainty>
                    </uncertainty>
                   </item>
                  </uvalues>
                  <type type="AtomicDisplacementParameters::Type" >
                   <enumerator type="int" >0</enumerator>
                  </type>
                  <u_equivalent type="float" >0.024630935828168391</u_equivalent>
                 </value>
                </adps>
               </value>
              </site>
              <annotations type="Annotations" >
               <annotations type="Container" >
                <count type="int" >1</count>
                <item type="Handle" >
                 <serial_number type="int" >287</serial_number>
                 <value type="FileOrdering" >
                  <value type="Handle" >
                   <serial_number type="int" >288</serial_number>
                   <value type="FileOrdering" >
                    <file_order type="int" >46</file_order>
                   </value>
                  </value>
                 </value>
                </item>
               </annotations>
              </annotations>
             </value>
            </item>
            <item type="Handle" >
             <serial_number type="int" >289</serial_number>
             <value type="Atom3d" >
              <element type="Element" >
               <code type="char" >1</code>
              </element>
              <formal_charge type="int" >0</formal_charge>
              <radius type="float" >0.68000000000000005</radius>
              <label type="string" >C23</label>
              <site type="Handle" >
               <serial_number type="int" >290</serial_number>
               <value type="Site" >
                <orthogonal type="Point" >
                 <coordinates type="Vector" >
                  <vector type="Container" >
                   <count type="int" >3</count>
                   <item type="float" >3.4506897659109761</item>
                   <item type="float" >1.0153934000000004</item>
                   <item type="float" >4.7832542276842869</item>
                  </vector>
                 </coordinates>
                </orthogonal>
                <fractional type="Point" >
                 <coordinates type="Vector" >
                  <vector type="Container" >
                   <count type="int" >3</count>
                   <item type="float" >0.39957999999999999</item>
                   <item type="float" >0.1414</item>
                   <item type="float" >0.20096</item>
                  </vector>
                 </coordinates>
                </fractional>
                <uncertain_value type="UncertainValue" >
                 <value type="float" >1</value>
                 <uncertainty type="Uncertainty" >
                  <precision type="int" >0</precision>
                  <uncertainty type="int" >0</uncertainty>
                 </uncertainty>
                </uncertain_value>
                <uncertainty type="Handle" >
                 <serial_number type="int" >291</serial_number>
                 <value type="Container" >
                  <count type="int" >3</count>
                  <item type="Uncertainty" >
                   <precision type="int" >5</precision>
                   <uncertainty type="int" >14</uncertainty>
                  </item>
                  <item type="Uncertainty" >
                   <precision type="int" >4</precision>
                   <uncertainty type="int" >2</uncertainty>
                  </item>
                  <item type="Uncertainty" >
                   <precision type="int" >5</precision>
                   <uncertainty type="int" >6</uncertainty>
                  </item>
                 </value>
                </uncertainty>
                <adps type="Handle" >
                 <serial_number type="int" >292</serial_number>
                 <value type="AtomicDisplacementParameters" >
                  <uvalues type="Container" >
                   <count type="int" >6</count>
                   <item type="UncertainValue" >
                    <value type="float" >0.026700000000000002</value>
                    <uncertainty type="Uncertainty" >
                     <precision type="int" >4</precision>
                     <uncertainty type="int" >7</uncertainty>
                    </uncertainty>
                   </item>
                   <item type="UncertainValue" >
                    <value type="float" >0.027900000000000001</value>
                    <uncertainty type="Uncertainty" >
                     <precision type="int" >4</precision>
                     <uncertainty type="int" >8</uncertainty>
                    </uncertainty>
                   </item>
                   <item type="UncertainValue" >
                    <value type="float" >0.022599999999999999</value>
                    <uncertainty type="Uncertainty" >
                     <precision type="int" >4</precision>
                     <uncertainty type="int" >7</uncertainty>
                    </uncertainty>
                   </item>
                   <item type="UncertainValue" >
                    <value type="float" >-0.0016999999999999999</value>
                    <uncertainty type="Uncertainty" >
                     <precision type="int" >4</precision>
                     <uncertainty type="int" >6</uncertainty>
                    </uncertainty>
                   </item>
                   <item type="UncertainValue" >
                    <value type="float" >0.0080000000000000002</value>
                    <uncertainty type="Uncertainty" >
                     <precision type="int" >4</precision>
                     <uncertainty type="int" >6</uncertainty>
                    </uncertainty>
                   </item>
                   <item type="UncertainValue" >
                    <value type="float" >-0.0070000000000000001</value>
                    <uncertainty type="Uncertainty" >
                     <precision type="int" >4</precision>
                     <uncertainty type="int" >6</uncertainty>
                    </uncertainty>
                   </item>
                  </uvalues>
                  <type type="AtomicDisplacementParameters::Type" >
                   <enumerator type="int" >0</enumerator>
                  </type>
                  <u_equivalent type="float" >0.025300725185385967</u_equivalent>
                 </value>
                </adps>
               </value>
              </site>
              <annotations type="Annotations" >
               <annotations type="Container" >
                <count type="int" >1</count>
                <item type="Handle" >
                 <serial_number type="int" >293</serial_number>
                 <value type="FileOrdering" >
                  <value type="Handle" >
                   <serial_number type="int" >294</serial_number>
                   <value type="FileOrdering" >
                    <file_order type="int" >47</file_order>
                   </value>
                  </value>
                 </value>
                </item>
               </annotations>
              </annotations>
             </value>
            </item>
           </atoms>
           <bonds type="Container" >
            <count type="int" >52</count>
            <item type="PersistenceGraphEdge" >
             <edge type="Handle" >
              <serial_number type="int" >295</serial_number>
              <value type="Bond3d" >
               <bond_type type="BondType" >
                <enumerator type="int" >0</enumerator>
               </bond_type>
               <polymeric type="bool" >false</polymeric>
               <annotations type="Annotations" >
                <annotations type="Container" >
                 <count type="int" >0</count>
                </annotations>
               </annotations>
              </value>
             </edge>
             <node1 type="int" >0</node1>
             <node2 type="int" >2</node2>
            </item>
            <item type="PersistenceGraphEdge" >
             <edge type="Handle" >
              <serial_number type="int" >296</serial_number>
              <value type="Bond3d" >
               <bond_type type="BondType" >
                <enumerator type="int" >0</enumerator>
               </bond_type>
               <polymeric type="bool" >false</polymeric>
               <annotations type="Annotations" >
                <annotations type="Container" >
                 <count type="int" >0</count>
                </annotations>
               </annotations>
              </value>
             </edge>
             <node1 type="int" >1</node1>
             <node2 type="int" >3</node2>
            </item>
            <item type="PersistenceGraphEdge" >
             <edge type="Handle" >
              <serial_number type="int" >297</serial_number>
              <value type="Bond3d" >
               <bond_type type="BondType" >
                <enumerator type="int" >0</enumerator>
               </bond_type>
               <polymeric type="bool" >false</polymeric>
               <annotations type="Annotations" >
                <annotations type="Container" >
                 <count type="int" >0</count>
                </annotations>
               </annotations>
              </value>
             </edge>
             <node1 type="int" >2</node1>
             <node2 type="int" >4</node2>
            </item>
            <item type="PersistenceGraphEdge" >
             <edge type="Handle" >
              <serial_number type="int" >298</serial_number>
              <value type="Bond3d" >
               <bond_type type="BondType" >
                <enumerator type="int" >0</enumerator>
               </bond_type>
               <polymeric type="bool" >false</polymeric>
               <annotations type="Annotations" >
                <annotations type="Container" >
                 <count type="int" >0</count>
                </annotations>
               </annotations>
              </value>
             </edge>
             <node1 type="int" >2</node1>
             <node2 type="int" >22</node2>
            </item>
            <item type="PersistenceGraphEdge" >
             <edge type="Handle" >
              <serial_number type="int" >299</serial_number>
              <value type="Bond3d" >
               <bond_type type="BondType" >
                <enumerator type="int" >0</enumerator>
               </bond_type>
               <polymeric type="bool" >false</polymeric>
               <annotations type="Annotations" >
                <annotations type="Container" >
                 <count type="int" >0</count>
                </annotations>
               </annotations>
              </value>
             </edge>
             <node1 type="int" >3</node1>
             <node2 type="int" >13</node2>
            </item>
            <item type="PersistenceGraphEdge" >
             <edge type="Handle" >
              <serial_number type="int" >300</serial_number>
              <value type="Bond3d" >
               <bond_type type="BondType" >
                <enumerator type="int" >0</enumerator>
               </bond_type>
               <polymeric type="bool" >false</polymeric>
               <annotations type="Annotations" >
                <annotations type="Container" >
                 <count type="int" >0</count>
                </annotations>
               </annotations>
              </value>
             </edge>
             <node1 type="int" >3</node1>
             <node2 type="int" >22</node2>
            </item>
            <item type="PersistenceGraphEdge" >
             <edge type="Handle" >
              <serial_number type="int" >301</serial_number>
              <value type="Bond3d" >
               <bond_type type="BondType" >
                <enumerator type="int" >0</enumerator>
               </bond_type>
               <polymeric type="bool" >false</polymeric>
               <annotations type="Annotations" >
                <annotations type="Container" >
                 <count type="int" >0</count>
                </annotations>
               </annotations>
              </value>
             </edge>
             <node1 type="int" >4</node1>
             <node2 type="int" >5</node2>
            </item>
            <item type="PersistenceGraphEdge" >
             <edge type="Handle" >
              <serial_number type="int" >302</serial_number>
              <value type="Bond3d" >
               <bond_type type="BondType" >
                <enumerator type="int" >0</enumerator>
               </bond_type>
               <polymeric type="bool" >false</polymeric>
               <annotations type="Annotations" >
                <annotations type="Container" >
                 <count type="int" >0</count>
                </annotations>
               </annotations>
              </value>
             </edge>
             <node1 type="int" >4</node1>
             <node2 type="int" >9</node2>
            </item>
            <item type="PersistenceGraphEdge" >
             <edge type="Handle" >
              <serial_number type="int" >303</serial_number>
              <value type="Bond3d" >
               <bond_type type="BondType" >
                <enumerator type="int" >0</enumerator>
               </bond_type>
               <polymeric type="bool" >false</polymeric>
               <annotations type="Annotations" >
                <annotations type="Container" >
                 <count type="int" >0</count>
                </annotations>
               </annotations>
              </value>
             </edge>
             <node1 type="int" >4</node1>
             <node2 type="int" >13</node2>
            </item>
            <item type="PersistenceGraphEdge" >
             <edge type="Handle" >
              <serial_number type="int" >304</serial_number>
              <value type="Bond3d" >
               <bond_type type="BondType" >
                <enumerator type="int" >0</enumerator>
               </bond_type>
               <polymeric type="bool" >false</polymeric>
               <annotations type="Annotations" >
                <annotations type="Container" >
                 <count type="int" >0</count>
                </annotations>
               </annotations>
              </value>
             </edge>
             <node1 type="int" >5</node1>
             <node2 type="int" >6</node2>
            </item>
            <item type="PersistenceGraphEdge" >
             <edge type="Handle" >
              <serial_number type="int" >305</serial_number>
              <value type="Bond3d" >
               <bond_type type="BondType" >
                <enumerator type="int" >0</enumerator>
               </bond_type>
               <polymeric type="bool" >false</polymeric>
               <annotations type="Annotations" >
                <annotations type="Container" >
                 <count type="int" >0</count>
                </annotations>
               </annotations>
              </value>
             </edge>
             <node1 type="int" >5</node1>
             <node2 type="int" >7</node2>
            </item>
            <item type="PersistenceGraphEdge" >
             <edge type="Handle" >
              <serial_number type="int" >306</serial_number>
              <value type="Bond3d" >
               <bond_type type="BondType" >
                <enumerator type="int" >0</enumerator>
               </bond_type>
               <polymeric type="bool" >false</polymeric>
               <annotations type="Annotations" >
                <annotations type="Container" >
                 <count type="int" >0</count>
                </annotations>
               </annotations>
              </value>
             </edge>
             <node1 type="int" >5</node1>
             <node2 type="int" >8</node2>
            </item>
            <item type="PersistenceGraphEdge" >
             <edge type="Handle" >
              <serial_number type="int" >307</serial_number>
              <value type="Bond3d" >
               <bond_type type="BondType" >
                <enumerator type="int" >0</enumerator>
               </bond_type>
               <polymeric type="bool" >false</polymeric>
               <annotations type="Annotations" >
                <annotations type="Container" >
                 <count type="int" >0</count>
                </annotations>
               </annotations>
              </value>
             </edge>
             <node1 type="int" >9</node1>
             <node2 type="int" >10</node2>
            </item>
            <item type="PersistenceGraphEdge" >
             <edge type="Handle" >
              <serial_number type="int" >308</serial_number>
              <value type="Bond3d" >
               <bond_type type="BondType" >
                <enumerator type="int" >0</enumerator>
               </bond_type>
               <polymeric type="bool" >false</polymeric>
               <annotations type="Annotations" >
                <annotations type="Container" >
                 <count type="int" >0</count>
                </annotations>
               </annotations>
              </value>
             </edge>
             <node1 type="int" >9</node1>
             <node2 type="int" >11</node2>
            </item>
            <item type="PersistenceGraphEdge" >
             <edge type="Handle" >
              <serial_number type="int" >309</serial_number>
              <value type="Bond3d" >
               <bond_type type="BondType" >
                <enumerator type="int" >0</enumerator>
               </bond_type>
               <polymeric type="bool" >false</polymeric>
               <annotations type="Annotations" >
                <annotations type="Container" >
                 <count type="int" >0</count>
                </annotations>
               </annotations>
              </value>
             </edge>
             <node1 type="int" >9</node1>
             <node2 type="int" >12</node2>
            </item>
            <item type="PersistenceGraphEdge" >
             <edge type="Handle" >
              <serial_number type="int" >310</serial_number>
              <value type="Bond3d" >
               <bond_type type="BondType" >
                <enumerator type="int" >0</enumerator>
               </bond_type>
               <polymeric type="bool" >false</polymeric>
               <annotations type="Annotations" >
                <annotations type="Container" >
                 <count type="int" >0</count>
                </annotations>
               </annotations>
              </value>
             </edge>
             <node1 type="int" >13</node1>
             <node2 type="int" >14</node2>
            </item>
            <item type="PersistenceGraphEdge" >
             <edge type="Handle" >
              <serial_number type="int" >311</serial_number>
              <value type="Bond3d" >
               <bond_type type="BondType" >
                <enumerator type="int" >0</enumerator>
               </bond_type>
               <polymeric type="bool" >false</polymeric>
               <annotations type="Annotations" >
                <annotations type="Container" >
                 <count type="int" >0</count>
                </annotations>
               </annotations>
              </value>
             </edge>
             <node1 type="int" >13</node1>
             <node2 type="int" >18</node2>
            </item>
            <item type="PersistenceGraphEdge" >
             <edge type="Handle" >
              <serial_number type="int" >312</serial_number>
              <value type="Bond3d" >
               <bond_type type="BondType" >
                <enumerator type="int" >0</enumerator>
               </bond_type>
               <polymeric type="bool" >false</polymeric>
               <annotations type="Annotations" >
                <annotations type="Container" >
                 <count type="int" >0</count>
                </annotations>
               </annotations>
              </value>
             </edge>
             <node1 type="int" >14</node1>
             <node2 type="int" >15</node2>
            </item>
            <item type="PersistenceGraphEdge" >
             <edge type="Handle" >
              <serial_number type="int" >313</serial_number>
              <value type="Bond3d" >
               <bond_type type="BondType" >
                <enumerator type="int" >0</enumerator>
               </bond_type>
               <polymeric type="bool" >false</polymeric>
               <annotations type="Annotations" >
                <annotations type="Container" >
                 <count type="int" >0</count>
                </annotations>
               </annotations>
              </value>
             </edge>
             <node1 type="int" >14</node1>
             <node2 type="int" >16</node2>
            </item>
            <item type="PersistenceGraphEdge" >
             <edge type="Handle" >
              <serial_number type="int" >314</serial_number>
              <value type="Bond3d" >
               <bond_type type="BondType" >
                <enumerator type="int" >0</enumerator>
               </bond_type>
               <polymeric type="bool" >false</polymeric>
               <annotations type="Annotations" >
                <annotations type="Container" >
                 <count type="int" >0</count>
                </annotations>
               </annotations>
              </value>
             </edge>
             <node1 type="int" >14</node1>
             <node2 type="int" >17</node2>
            </item>
            <item type="PersistenceGraphEdge" >
             <edge type="Handle" >
              <serial_number type="int" >315</serial_number>
              <value type="Bond3d" >
               <bond_type type="BondType" >
                <enumerator type="int" >0</enumerator>
               </bond_type>
               <polymeric type="bool" >false</polymeric>
               <annotations type="Annotations" >
                <annotations type="Container" >
                 <count type="int" >0</count>
                </annotations>
               </annotations>
              </value>
             </edge>
             <node1 type="int" >18</node1>
             <node2 type="int" >19</node2>
            </item>
            <item type="PersistenceGraphEdge" >
             <edge type="Handle" >
              <serial_number type="int" >316</serial_number>
              <value type="Bond3d" >
               <bond_type type="BondType" >
                <enumerator type="int" >0</enumerator>
               </bond_type>
               <polymeric type="bool" >false</polymeric>
               <annotations type="Annotations" >
                <annotations type="Container" >
                 <count type="int" >0</count>
                </annotations>
               </annotations>
              </value>
             </edge>
             <node1 type="int" >18</node1>
             <node2 type="int" >20</node2>
            </item>
            <item type="PersistenceGraphEdge" >
             <edge type="Handle" >
              <serial_number type="int" >317</serial_number>
              <value type="Bond3d" >
               <bond_type type="BondType" >
                <enumerator type="int" >0</enumerator>
               </bond_type>
               <polymeric type="bool" >false</polymeric>
               <annotations type="Annotations" >
                <annotations type="Container" >
                 <count type="int" >0</count>
                </annotations>
               </annotations>
              </value>
             </edge>
             <node1 type="int" >18</node1>
             <node2 type="int" >21</node2>
            </item>
            <item type="PersistenceGraphEdge" >
             <edge type="Handle" >
              <serial_number type="int" >318</serial_number>
              <value type="Bond3d" >
               <bond_type type="BondType" >
                <enumerator type="int" >0</enumerator>
               </bond_type>
               <polymeric type="bool" >false</polymeric>
               <annotations type="Annotations" >
                <annotations type="Container" >
                 <count type="int" >0</count>
                </annotations>
               </annotations>
              </value>
             </edge>
             <node1 type="int" >22</node1>
             <node2 type="int" >23</node2>
            </item>
            <item type="PersistenceGraphEdge" >
             <edge type="Handle" >
              <serial_number type="int" >319</serial_number>
              <value type="Bond3d" >
               <bond_type type="BondType" >
                <enumerator type="int" >0</enumerator>
               </bond_type>
               <polymeric type="bool" >false</polymeric>
               <annotations type="Annotations" >
                <annotations type="Container" >
                 <count type="int" >0</count>
                </annotations>
               </annotations>
              </value>
             </edge>
             <node1 type="int" >23</node1>
             <node2 type="int" >24</node2>
            </item>
            <item type="PersistenceGraphEdge" >
             <edge type="Handle" >
              <serial_number type="int" >320</serial_number>
              <value type="Bond3d" >
               <bond_type type="BondType" >
                <enumerator type="int" >0</enumerator>
               </bond_type>
               <polymeric type="bool" >false</polymeric>
               <annotations type="Annotations" >
                <annotations type="Container" >
                 <count type="int" >0</count>
                </annotations>
               </annotations>
              </value>
             </edge>
             <node1 type="int" >23</node1>
             <node2 type="int" >45</node2>
            </item>
            <item type="PersistenceGraphEdge" >
             <edge type="Handle" >
              <serial_number type="int" >321</serial_number>
              <value type="Bond3d" >
               <bond_type type="BondType" >
                <enumerator type="int" >0</enumerator>
               </bond_type>
               <polymeric type="bool" >false</polymeric>
               <annotations type="Annotations" >
                <annotations type="Container" >
                 <count type="int" >0</count>
                </annotations>
               </annotations>
              </value>
             </edge>
             <node1 type="int" >24</node1>
             <node2 type="int" >25</node2>
            </item>
            <item type="PersistenceGraphEdge" >
             <edge type="Handle" >
              <serial_number type="int" >322</serial_number>
              <value type="Bond3d" >
               <bond_type type="BondType" >
                <enumerator type="int" >0</enumerator>
               </bond_type>
               <polymeric type="bool" >false</polymeric>
               <annotations type="Annotations" >
                <annotations type="Container" >
                 <count type="int" >0</count>
                </annotations>
               </annotations>
              </value>
             </edge>
             <node1 type="int" >24</node1>
             <node2 type="int" >26</node2>
            </item>
            <item type="PersistenceGraphEdge" >
             <edge type="Handle" >
              <serial_number type="int" >323</serial_number>
              <value type="Bond3d" >
               <bond_type type="BondType" >
                <enumerator type="int" >0</enumerator>
               </bond_type>
               <polymeric type="bool" >false</polymeric>
               <annotations type="Annotations" >
                <annotations type="Container" >
                 <count type="int" >0</count>
                </annotations>
               </annotations>
              </value>
             </edge>
             <node1 type="int" >26</node1>
             <node2 type="int" >27</node2>
            </item>
            <item type="PersistenceGraphEdge" >
             <edge type="Handle" >
              <serial_number type="int" >324</serial_number>
              <value type="Bond3d" >
               <bond_type type="BondType" >
                <enumerator type="int" >0</enumerator>
               </bond_type>
               <polymeric type="bool" >false</polymeric>
               <annotations type="Annotations" >
                <annotations type="Container" >
                 <count type="int" >0</count>
                </annotations>
               </annotations>
              </value>
             </edge>
             <node1 type="int" >26</node1>
             <node2 type="int" >28</node2>
            </item>
            <item type="PersistenceGraphEdge" >
             <edge type="Handle" >
              <serial_number type="int" >325</serial_number>
              <value type="Bond3d" >
               <bond_type type="BondType" >
                <enumerator type="int" >0</enumerator>
               </bond_type>
               <polymeric type="bool" >false</polymeric>
               <annotations type="Annotations" >
                <annotations type="Container" >
                 <count type="int" >0</count>
                </annotations>
               </annotations>
              </value>
             </edge>
             <node1 type="int" >28</node1>
             <node2 type="int" >29</node2>
            </item>
            <item type="PersistenceGraphEdge" >
             <edge type="Handle" >
              <serial_number type="int" >326</serial_number>
              <value type="Bond3d" >
               <bond_type type="BondType" >
                <enumerator type="int" >0</enumerator>
               </bond_type>
               <polymeric type="bool" >false</polymeric>
               <annotations type="Annotations" >
                <annotations type="Container" >
                 <count type="int" >0</count>
                </annotations>
               </annotations>
              </value>
             </edge>
             <node1 type="int" >28</node1>
             <node2 type="int" >46</node2>
            </item>
            <item type="PersistenceGraphEdge" >
             <edge type="Handle" >
              <serial_number type="int" >327</serial_number>
              <value type="Bond3d" >
               <bond_type type="BondType" >
                <enumerator type="int" >0</enumerator>
               </bond_type>
               <polymeric type="bool" >false</polymeric>
               <annotations type="Annotations" >
                <annotations type="Container" >
                 <count type="int" >0</count>
                </annotations>
               </annotations>
              </value>
             </edge>
             <node1 type="int" >29</node1>
             <node2 type="int" >30</node2>
            </item>
            <item type="PersistenceGraphEdge" >
             <edge type="Handle" >
              <serial_number type="int" >328</serial_number>
              <value type="Bond3d" >
               <bond_type type="BondType" >
                <enumerator type="int" >0</enumerator>
               </bond_type>
               <polymeric type="bool" >false</polymeric>
               <annotations type="Annotations" >
                <annotations type="Container" >
                 <count type="int" >0</count>
                </annotations>
               </annotations>
              </value>
             </edge>
             <node1 type="int" >29</node1>
             <node2 type="int" >31</node2>
            </item>
            <item type="PersistenceGraphEdge" >
             <edge type="Handle" >
              <serial_number type="int" >329</serial_number>
              <value type="Bond3d" >
               <bond_type type="BondType" >
                <enumerator type="int" >0</enumerator>
               </bond_type>
               <polymeric type="bool" >false</polymeric>
               <annotations type="Annotations" >
                <annotations type="Container" >
                 <count type="int" >0</count>
                </annotations>
               </annotations>
              </value>
             </edge>
             <node1 type="int" >31</node1>
             <node2 type="int" >32</node2>
            </item>
            <item type="PersistenceGraphEdge" >
             <edge type="Handle" >
              <serial_number type="int" >330</serial_number>
              <value type="Bond3d" >
               <bond_type type="BondType" >
                <enumerator type="int" >0</enumerator>
               </bond_type>
               <polymeric type="bool" >false</polymeric>
               <annotations type="Annotations" >
                <annotations type="Container" >
                 <count type="int" >0</count>
                </annotations>
               </annotations>
              </value>
             </edge>
             <node1 type="int" >31</node1>
             <node2 type="int" >33</node2>
            </item>
            <item type="PersistenceGraphEdge" >
             <edge type="Handle" >
              <serial_number type="int" >331</serial_number>
              <value type="Bond3d" >
               <bond_type type="BondType" >
                <enumerator type="int" >0</enumerator>
               </bond_type>
               <polymeric type="bool" >false</polymeric>
               <annotations type="Annotations" >
                <annotations type="Container" >
                 <count type="int" >0</count>
                </annotations>
               </annotations>
              </value>
             </edge>
             <node1 type="int" >33</node1>
             <node2 type="int" >34</node2>
            </item>
            <item type="PersistenceGraphEdge" >
             <edge type="Handle" >
              <serial_number type="int" >332</serial_number>
              <value type="Bond3d" >
               <bond_type type="BondType" >
                <enumerator type="int" >0</enumerator>
               </bond_type>
               <polymeric type="bool" >false</polymeric>
               <annotations type="Annotations" >
                <annotations type="Container" >
                 <count type="int" >0</count>
                </annotations>
               </annotations>
              </value>
             </edge>
             <node1 type="int" >33</node1>
             <node2 type="int" >47</node2>
            </item>
            <item type="PersistenceGraphEdge" >
             <edge type="Handle" >
              <serial_number type="int" >333</serial_number>
              <value type="Bond3d" >
               <bond_type type="BondType" >
                <enumerator type="int" >0</enumerator>
               </bond_type>
               <polymeric type="bool" >false</polymeric>
               <annotations type="Annotations" >
                <annotations type="Container" >
                 <count type="int" >0</count>
                </annotations>
               </annotations>
              </value>
             </edge>
             <node1 type="int" >34</node1>
             <node2 type="int" >35</node2>
            </item>
            <item type="PersistenceGraphEdge" >
             <edge type="Handle" >
              <serial_number type="int" >334</serial_number>
              <value type="Bond3d" >
               <bond_type type="BondType" >
                <enumerator type="int" >0</enumerator>
               </bond_type>
               <polymeric type="bool" >false</polymeric>
               <annotations type="Annotations" >
                <annotations type="Container" >
                 <count type="int" >0</count>
                </annotations>
               </annotations>
              </value>
             </edge>
             <node1 type="int" >34</node1>
             <node2 type="int" >36</node2>
            </item>
            <item type="PersistenceGraphEdge" >
             <edge type="Handle" >
              <serial_number type="int" >335</serial_number>
              <value type="Bond3d" >
               <bond_type type="BondType" >
                <enumerator type="int" >0</enumerator>
               </bond_type>
               <polymeric type="bool" >false</polymeric>
               <annotations type="Annotations" >
                <annotations type="Container" >
                 <count type="int" >0</count>
                </annotations>
               </annotations>
              </value>
             </edge>
             <node1 type="int" >36</node1>
             <node2 type="int" >37</node2>
            </item>
            <item type="PersistenceGraphEdge" >
             <edge type="Handle" >
              <serial_number type="int" >336</serial_number>
              <value type="Bond3d" >
               <bond_type type="BondType" >
                <enumerator type="int" >0</enumerator>
               </bond_type>
               <polymeric type="bool" >false</polymeric>
               <annotations type="Annotations" >
                <annotations type="Container" >
                 <count type="int" >0</count>
                </annotations>
               </annotations>
              </value>
             </edge>
             <node1 type="int" >36</node1>
             <node2 type="int" >38</node2>
            </item>
            <item type="PersistenceGraphEdge" >
             <edge type="Handle" >
              <serial_number type="int" >337</serial_number>
              <value type="Bond3d" >
               <bond_type type="BondType" >
                <enumerator type="int" >0</enumerator>
               </bond_type>
               <polymeric type="bool" >false</polymeric>
               <annotations type="Annotations" >
                <annotations type="Container" >
                 <count type="int" >0</count>
                </annotations>
               </annotations>
              </value>
             </edge>
             <node1 type="int" >38</node1>
             <node2 type="int" >39</node2>
            </item>
            <item type="PersistenceGraphEdge" >
             <edge type="Handle" >
              <serial_number type="int" >338</serial_number>
              <value type="Bond3d" >
               <bond_type type="BondType" >
                <enumerator type="int" >0</enumerator>
               </bond_type>
               <polymeric type="bool" >false</polymeric>
               <annotations type="Annotations" >
                <annotations type="Container" >
                 <count type="int" >0</count>
                </annotations>
               </annotations>
              </value>
             </edge>
             <node1 type="int" >38</node1>
             <node2 type="int" >40</node2>
            </item>
            <item type="PersistenceGraphEdge" >
             <edge type="Handle" >
              <serial_number type="int" >339</serial_number>
              <value type="Bond3d" >
               <bond_type type="BondType" >
                <enumerator type="int" >0</enumerator>
               </bond_type>
               <polymeric type="bool" >false</polymeric>
               <annotations type="Annotations" >
                <annotations type="Container" >
                 <count type="int" >0</count>
                </annotations>
               </annotations>
              </value>
             </edge>
             <node1 type="int" >40</node1>
             <node2 type="int" >41</node2>
            </item>
            <item type="PersistenceGraphEdge" >
             <edge type="Handle" >
              <serial_number type="int" >340</serial_number>
              <value type="Bond3d" >
               <bond_type type="BondType" >
                <enumerator type="int" >0</enumerator>
               </bond_type>
               <polymeric type="bool" >false</polymeric>
               <annotations type="Annotations" >
                <annotations type="Container" >
                 <count type="int" >0</count>
                </annotations>
               </annotations>
              </value>
             </edge>
             <node1 type="int" >40</node1>
             <node2 type="int" >47</node2>
            </item>
            <item type="PersistenceGraphEdge" >
             <edge type="Handle" >
              <serial_number type="int" >341</serial_number>
              <value type="Bond3d" >
               <bond_type type="BondType" >
                <enumerator type="int" >0</enumerator>
               </bond_type>
               <polymeric type="bool" >false</polymeric>
               <annotations type="Annotations" >
                <annotations type="Container" >
                 <count type="int" >0</count>
                </annotations>
               </annotations>
              </value>
             </edge>
             <node1 type="int" >41</node1>
             <node2 type="int" >42</node2>
            </item>
            <item type="PersistenceGraphEdge" >
             <edge type="Handle" >
              <serial_number type="int" >342</serial_number>
              <value type="Bond3d" >
               <bond_type type="BondType" >
                <enumerator type="int" >0</enumerator>
               </bond_type>
               <polymeric type="bool" >false</polymeric>
               <annotations type="Annotations" >
                <annotations type="Container" >
                 <count type="int" >0</count>
                </annotations>
               </annotations>
              </value>
             </edge>
             <node1 type="int" >41</node1>
             <node2 type="int" >43</node2>
            </item>
            <item type="PersistenceGraphEdge" >
             <edge type="Handle" >
              <serial_number type="int" >343</serial_number>
              <value type="Bond3d" >
               <bond_type type="BondType" >
                <enumerator type="int" >0</enumerator>
               </bond_type>
               <polymeric type="bool" >false</polymeric>
               <annotations type="Annotations" >
                <annotations type="Container" >
                 <count type="int" >0</count>
                </annotations>
               </annotations>
              </value>
             </edge>
             <node1 type="int" >43</node1>
             <node2 type="int" >44</node2>
            </item>
            <item type="PersistenceGraphEdge" >
             <edge type="Handle" >
              <serial_number type="int" >344</serial_number>
              <value type="Bond3d" >
               <bond_type type="BondType" >
                <enumerator type="int" >0</enumerator>
               </bond_type>
               <polymeric type="bool" >false</polymeric>
               <annotations type="Annotations" >
                <annotations type="Container" >
                 <count type="int" >0</count>
                </annotations>
               </annotations>
              </value>
             </edge>
             <node1 type="int" >43</node1>
             <node2 type="int" >45</node2>
            </item>
            <item type="PersistenceGraphEdge" >
             <edge type="Handle" >
              <serial_number type="int" >345</serial_number>
              <value type="Bond3d" >
               <bond_type type="BondType" >
                <enumerator type="int" >0</enumerator>
               </bond_type>
               <polymeric type="bool" >false</polymeric>
               <annotations type="Annotations" >
                <annotations type="Container" >
                 <count type="int" >0</count>
                </annotations>
               </annotations>
              </value>
             </edge>
             <node1 type="int" >45</node1>
             <node2 type="int" >46</node2>
            </item>
            <item type="PersistenceGraphEdge" >
             <edge type="Handle" >
              <serial_number type="int" >346</serial_number>
              <value type="Bond3d" >
               <bond_type type="BondType" >
                <enumerator type="int" >0</enumerator>
               </bond_type>
               <polymeric type="bool" >false</polymeric>
               <annotations type="Annotations" >
                <annotations type="Container" >
                 <count type="int" >0</count>
                </annotations>
               </annotations>
              </value>
             </edge>
             <node1 type="int" >46</node1>
             <node2 type="int" >47</node2>
            </item>
           </bonds>
          </value>
         </molecule>
         <disorder_assemblies type="Container" >
          <count type="int" >0</count>
         </disorder_assemblies>
         <crystal_symmetry_match type="Handle" >
          <serial_number type="int" >347</serial_number>
          <value type="CrystalSymmetryMatch" >
           <crystal_symmetry_match_data type="Container" >
            <count type="int" >48</count>
            <item type="Pair" >
             <first type="Handle" >
              <serial_number type="int" >7</serial_number>
             </first>
             <second type="CrystalSymmetryMatchData" >
              <base type="Handle" >
               <serial_number type="int" >7</serial_number>
              </base>
              <transformation type="Handle" >
               <serial_number type="int" >348</serial_number>
               <value type="CrystalSymmetryTransformation" >
                <symmetry_operator type="CrystalSymmetryOperator" >
                 <rotation type="Matrix" >
                  <matrix type="Vector" >
                   <vector type="Container" >
                    <count type="int" >9</count>
                    <item type="int" >1</item>
                    <item type="int" >0</item>
                    <item type="int" >0</item>
                    <item type="int" >0</item>
                    <item type="int" >1</item>
                    <item type="int" >0</item>
                    <item type="int" >0</item>
                    <item type="int" >0</item>
                    <item type="int" >1</item>
                   </vector>
                  </matrix>
                 </rotation>
                 <translation type="Vector" >
                  <vector type="Container" >
                   <count type="int" >3</count>
                   <item type="float" >0</item>
                   <item type="float" >0</item>
                   <item type="float" >0</item>
                  </vector>
                 </translation>
                </symmetry_operator>
                <unit_cell_translation type="Vector" >
                 <vector type="Container" >
                  <count type="int" >3</count>
                  <item type="int" >0</item>
                  <item type="int" >0</item>
                  <item type="int" >0</item>
                 </vector>
                </unit_cell_translation>
               </value>
              </transformation>
              <site_order type="int" >1</site_order>
             </second>
            </item>
            <item type="Pair" >
             <first type="Handle" >
              <serial_number type="int" >13</serial_number>
             </first>
             <second type="CrystalSymmetryMatchData" >
              <base type="Handle" >
               <serial_number type="int" >13</serial_number>
              </base>
              <transformation type="Handle" >
               <serial_number type="int" >348</serial_number>
              </transformation>
              <site_order type="int" >1</site_order>
             </second>
            </item>
            <item type="Pair" >
             <first type="Handle" >
              <serial_number type="int" >19</serial_number>
             </first>
             <second type="CrystalSymmetryMatchData" >
              <base type="Handle" >
               <serial_number type="int" >19</serial_number>
              </base>
              <transformation type="Handle" >
               <serial_number type="int" >348</serial_number>
              </transformation>
              <site_order type="int" >1</site_order>
             </second>
            </item>
            <item type="Pair" >
             <first type="Handle" >
              <serial_number type="int" >25</serial_number>
             </first>
             <second type="CrystalSymmetryMatchData" >
              <base type="Handle" >
               <serial_number type="int" >25</serial_number>
              </base>
              <transformation type="Handle" >
               <serial_number type="int" >348</serial_number>
              </transformation>
              <site_order type="int" >1</site_order>
             </second>
            </item>
            <item type="Pair" >
             <first type="Handle" >
              <serial_number type="int" >31</serial_number>
             </first>
             <second type="CrystalSymmetryMatchData" >
              <base type="Handle" >
               <serial_number type="int" >31</serial_number>
              </base>
              <transformation type="Handle" >
               <serial_number type="int" >348</serial_number>
              </transformation>
              <site_order type="int" >1</site_order>
             </second>
            </item>
            <item type="Pair" >
             <first type="Handle" >
              <serial_number type="int" >37</serial_number>
             </first>
             <second type="CrystalSymmetryMatchData" >
              <base type="Handle" >
               <serial_number type="int" >37</serial_number>
              </base>
              <transformation type="Handle" >
               <serial_number type="int" >348</serial_number>
              </transformation>
              <site_order type="int" >1</site_order>
             </second>
            </item>
            <item type="Pair" >
             <first type="Handle" >
              <serial_number type="int" >43</serial_number>
             </first>
             <second type="CrystalSymmetryMatchData" >
              <base type="Handle" >
               <serial_number type="int" >43</serial_number>
              </base>
              <transformation type="Handle" >
               <serial_number type="int" >348</serial_number>
              </transformation>
              <site_order type="int" >1</site_order>
             </second>
            </item>
            <item type="Pair" >
             <first type="Handle" >
              <serial_number type="int" >49</serial_number>
             </first>
             <second type="CrystalSymmetryMatchData" >
              <base type="Handle" >
               <serial_number type="int" >49</serial_number>
              </base>
              <transformation type="Handle" >
               <serial_number type="int" >348</serial_number>
              </transformation>
              <site_order type="int" >1</site_order>
             </second>
            </item>
            <item type="Pair" >
             <first type="Handle" >
              <serial_number type="int" >55</serial_number>
             </first>
             <second type="CrystalSymmetryMatchData" >
              <base type="Handle" >
               <serial_number type="int" >55</serial_number>
              </base>
              <transformation type="Handle" >
               <serial_number type="int" >348</serial_number>
              </transformation>
              <site_order type="int" >1</site_order>
             </second>
            </item>
            <item type="Pair" >
             <first type="Handle" >
              <serial_number type="int" >61</serial_number>
             </first>
             <second type="CrystalSymmetryMatchData" >
              <base type="Handle" >
               <serial_number type="int" >61</serial_number>
              </base>
              <transformation type="Handle" >
               <serial_number type="int" >348</serial_number>
              </transformation>
              <site_order type="int" >1</site_order>
             </second>
            </item>
            <item type="Pair" >
             <first type="Handle" >
              <serial_number type="int" >67</serial_number>
             </first>
             <second type="CrystalSymmetryMatchData" >
              <base type="Handle" >
               <serial_number type="int" >67</serial_number>
              </base>
              <transformation type="Handle" >
               <serial_number type="int" >348</serial_number>
              </transformation>
              <site_order type="int" >1</site_order>
             </second>
            </item>
            <item type="Pair" >
             <first type="Handle" >
              <serial_number type="int" >73</serial_number>
             </first>
             <second type="CrystalSymmetryMatchData" >
              <base type="Handle" >
               <serial_number type="int" >73</serial_number>
              </base>
              <transformation type="Handle" >
               <serial_number type="int" >348</serial_number>
              </transformation>
              <site_order type="int" >1</site_order>
             </second>
            </item>
            <item type="Pair" >
             <first type="Handle" >
              <serial_number type="int" >79</serial_number>
             </first>
             <second type="CrystalSymmetryMatchData" >
              <base type="Handle" >
               <serial_number type="int" >79</serial_number>
              </base>
              <transformation type="Handle" >
               <serial_number type="int" >348</serial_number>
              </transformation>
              <site_order type="int" >1</site_order>
             </second>
            </item>
            <item type="Pair" >
             <first type="Handle" >
              <serial_number type="int" >85</serial_number>
             </first>
             <second type="CrystalSymmetryMatchData" >
              <base type="Handle" >
               <serial_number type="int" >85</serial_number>
              </base>
              <transformation type="Handle" >
               <serial_number type="int" >348</serial_number>
              </transformation>
              <site_order type="int" >1</site_order>
             </second>
            </item>
            <item type="Pair" >
             <first type="Handle" >
              <serial_number type="int" >91</serial_number>
             </first>
             <second type="CrystalSymmetryMatchData" >
              <base type="Handle" >
               <serial_number type="int" >91</serial_number>
              </base>
              <transformation type="Handle" >
               <serial_number type="int" >348</serial_number>
              </transformation>
              <site_order type="int" >1</site_order>
             </second>
            </item>
            <item type="Pair" >
             <first type="Handle" >
              <serial_number type="int" >97</serial_number>
             </first>
             <second type="CrystalSymmetryMatchData" >
              <base type="Handle" >
               <serial_number type="int" >97</serial_number>
              </base>
              <transformation type="Handle" >
               <serial_number type="int" >348</serial_number>
              </transformation>
              <site_order type="int" >1</site_order>
             </second>
            </item>
            <item type="Pair" >
             <first type="Handle" >
              <serial_number type="int" >103</serial_number>
             </first>
             <second type="CrystalSymmetryMatchData" >
              <base type="Handle" >
               <serial_number type="int" >103</serial_number>
              </base>
              <transformation type="Handle" >
               <serial_number type="int" >348</serial_number>
              </transformation>
              <site_order type="int" >1</site_order>
             </second>
            </item>
            <item type="Pair" >
             <first type="Handle" >
              <serial_number type="int" >109</serial_number>
             </first>
             <second type="CrystalSymmetryMatchData" >
              <base type="Handle" >
               <serial_number type="int" >109</serial_number>
              </base>
              <transformation type="Handle" >
               <serial_number type="int" >348</serial_number>
              </transformation>
              <site_order type="int" >1</site_order>
             </second>
            </item>
            <item type="Pair" >
             <first type="Handle" >
              <serial_number type="int" >115</serial_number>
             </first>
             <second type="CrystalSymmetryMatchData" >
              <base type="Handle" >
               <serial_number type="int" >115</serial_number>
              </base>
              <transformation type="Handle" >
               <serial_number type="int" >348</serial_number>
              </transformation>
              <site_order type="int" >1</site_order>
             </second>
            </item>
            <item type="Pair" >
             <first type="Handle" >
              <serial_number type="int" >121</serial_number>
             </first>
             <second type="CrystalSymmetryMatchData" >
              <base type="Handle" >
               <serial_number type="int" >121</serial_number>
              </base>
              <transformation type="Handle" >
               <serial_number type="int" >348</serial_number>
              </transformation>
              <site_order type="int" >1</site_order>
             </second>
            </item>
            <item type="Pair" >
             <first type="Handle" >
              <serial_number type="int" >127</serial_number>
             </first>
             <second type="CrystalSymmetryMatchData" >
              <base type="Handle" >
               <serial_number type="int" >127</serial_number>
              </base>
              <transformation type="Handle" >
               <serial_number type="int" >348</serial_number>
              </transformation>
              <site_order type="int" >1</site_order>
             </second>
            </item>
            <item type="Pair" >
             <first type="Handle" >
              <serial_number type="int" >133</serial_number>
             </first>
             <second type="CrystalSymmetryMatchData" >
              <base type="Handle" >
               <serial_number type="int" >133</serial_number>
              </base>
              <transformation type="Handle" >
               <serial_number type="int" >348</serial_number>
              </transformation>
              <site_order type="int" >1</site_order>
             </second>
            </item>
            <item type="Pair" >
             <first type="Handle" >
              <serial_number type="int" >139</serial_number>
             </first>
             <second type="CrystalSymmetryMatchData" >
              <base type="Handle" >
               <serial_number type="int" >139</serial_number>
              </base>
              <transformation type="Handle" >
               <serial_number type="int" >348</serial_number>
              </transformation>
              <site_order type="int" >1</site_order>
             </second>
            </item>
            <item type="Pair" >
             <first type="Handle" >
              <serial_number type="int" >145</serial_number>
             </first>
             <second type="CrystalSymmetryMatchData" >
              <base type="Handle" >
               <serial_number type="int" >145</serial_number>
              </base>
              <transformation type="Handle" >
               <serial_number type="int" >348</serial_number>
              </transformation>
              <site_order type="int" >1</site_order>
             </second>
            </item>
            <item type="Pair" >
             <first type="Handle" >
              <serial_number type="int" >151</serial_number>
             </first>
             <second type="CrystalSymmetryMatchData" >
              <base type="Handle" >
               <serial_number type="int" >151</serial_number>
              </base>
              <transformation type="Handle" >
               <serial_number type="int" >348</serial_number>
              </transformation>
              <site_order type="int" >1</site_order>
             </second>
            </item>
            <item type="Pair" >
             <first type="Handle" >
              <serial_number type="int" >157</serial_number>
             </first>
             <second type="CrystalSymmetryMatchData" >
              <base type="Handle" >
               <serial_number type="int" >157</serial_number>
              </base>
              <transformation type="Handle" >
               <serial_number type="int" >348</serial_number>
              </transformation>
              <site_order type="int" >1</site_order>
             </second>
            </item>
            <item type="Pair" >
             <first type="Handle" >
              <serial_number type="int" >163</serial_number>
             </first>
             <second type="CrystalSymmetryMatchData" >
              <base type="Handle" >
               <serial_number type="int" >163</serial_number>
              </base>
              <transformation type="Handle" >
               <serial_number type="int" >348</serial_number>
              </transformation>
              <site_order type="int" >1</site_order>
             </second>
            </item>
            <item type="Pair" >
             <first type="Handle" >
              <serial_number type="int" >169</serial_number>
             </first>
             <second type="CrystalSymmetryMatchData" >
              <base type="Handle" >
               <serial_number type="int" >169</serial_number>
              </base>
              <transformation type="Handle" >
               <serial_number type="int" >348</serial_number>
              </transformation>
              <site_order type="int" >1</site_order>
             </second>
            </item>
            <item type="Pair" >
             <first type="Handle" >
              <serial_number type="int" >175</serial_number>
             </first>
             <second type="CrystalSymmetryMatchData" >
              <base type="Handle" >
               <serial_number type="int" >175</serial_number>
              </base>
              <transformation type="Handle" >
               <serial_number type="int" >348</serial_number>
              </transformation>
              <site_order type="int" >1</site_order>
             </second>
            </item>
            <item type="Pair" >
             <first type="Handle" >
              <serial_number type="int" >181</serial_number>
             </first>
             <second type="CrystalSymmetryMatchData" >
              <base type="Handle" >
               <serial_number type="int" >181</serial_number>
              </base>
              <transformation type="Handle" >
               <serial_number type="int" >348</serial_number>
              </transformation>
              <site_order type="int" >1</site_order>
             </second>
            </item>
            <item type="Pair" >
             <first type="Handle" >
              <serial_number type="int" >187</serial_number>
             </first>
             <second type="CrystalSymmetryMatchData" >
              <base type="Handle" >
               <serial_number type="int" >187</serial_number>
              </base>
              <transformation type="Handle" >
               <serial_number type="int" >348</serial_number>
              </transformation>
              <site_order type="int" >1</site_order>
             </second>
            </item>
            <item type="Pair" >
             <first type="Handle" >
              <serial_number type="int" >193</serial_number>
             </first>
             <second type="CrystalSymmetryMatchData" >
              <base type="Handle" >
               <serial_number type="int" >193</serial_number>
              </base>
              <transformation type="Handle" >
               <serial_number type="int" >348</serial_number>
              </transformation>
              <site_order type="int" >1</site_order>
             </second>
            </item>
            <item type="Pair" >
             <first type="Handle" >
              <serial_number type="int" >199</serial_number>
             </first>
             <second type="CrystalSymmetryMatchData" >
              <base type="Handle" >
               <serial_number type="int" >199</serial_number>
              </base>
              <transformation type="Handle" >
               <serial_number type="int" >348</serial_number>
              </transformation>
              <site_order type="int" >1</site_order>
             </second>
            </item>
            <item type="Pair" >
             <first type="Handle" >
              <serial_number type="int" >205</serial_number>
             </first>
             <second type="CrystalSymmetryMatchData" >
              <base type="Handle" >
               <serial_number type="int" >205</serial_number>
              </base>
              <transformation type="Handle" >
               <serial_number type="int" >348</serial_number>
              </transformation>
              <site_order type="int" >1</site_order>
             </second>
            </item>
            <item type="Pair" >
             <first type="Handle" >
              <serial_number type="int" >211</serial_number>
             </first>
             <second type="CrystalSymmetryMatchData" >
              <base type="Handle" >
               <serial_number type="int" >211</serial_number>
              </base>
              <transformation type="Handle" >
               <serial_number type="int" >348</serial_number>
              </transformation>
              <site_order type="int" >1</site_order>
             </second>
            </item>
            <item type="Pair" >
             <first type="Handle" >
              <serial_number type="int" >217</serial_number>
             </first>
             <second type="CrystalSymmetryMatchData" >
              <base type="Handle" >
               <serial_number type="int" >217</serial_number>
              </base>
              <transformation type="Handle" >
               <serial_number type="int" >348</serial_number>
              </transformation>
              <site_order type="int" >1</site_order>
             </second>
            </item>
            <item type="Pair" >
             <first type="Handle" >
              <serial_number type="int" >223</serial_number>
             </first>
             <second type="CrystalSymmetryMatchData" >
              <base type="Handle" >
               <serial_number type="int" >223</serial_number>
              </base>
              <transformation type="Handle" >
               <serial_number type="int" >348</serial_number>
              </transformation>
              <site_order type="int" >1</site_order>
             </second>
            </item>
            <item type="Pair" >
             <first type="Handle" >
              <serial_number type="int" >229</serial_number>
             </first>
             <second type="CrystalSymmetryMatchData" >
              <base type="Handle" >
               <serial_number type="int" >229</serial_number>
              </base>
              <transformation type="Handle" >
               <serial_number type="int" >348</serial_number>
              </transformation>
              <site_order type="int" >1</site_order>
             </second>
            </item>
            <item type="Pair" >
             <first type="Handle" >
              <serial_number type="int" >235</serial_number>
             </first>
             <second type="CrystalSymmetryMatchData" >
              <base type="Handle" >
               <serial_number type="int" >235</serial_number>
              </base>
              <transformation type="Handle" >
               <serial_number type="int" >348</serial_number>
              </transformation>
              <site_order type="int" >1</site_order>
             </second>
            </item>
            <item type="Pair" >
             <first type="Handle" >
              <serial_number type="int" >241</serial_number>
             </first>
             <second type="CrystalSymmetryMatchData" >
              <base type="Handle" >
               <serial_number type="int" >241</serial_number>
              </base>
              <transformation type="Handle" >
               <serial_number type="int" >348</serial_number>
              </transformation>
              <site_order type="int" >1</site_order>
             </second>
            </item>
            <item type="Pair" >
             <first type="Handle" >
              <serial_number type="int" >247</serial_number>
             </first>
             <second type="CrystalSymmetryMatchData" >
              <base type="Handle" >
               <serial_number type="int" >247</serial_number>
              </base>
              <transformation type="Handle" >
               <serial_number type="int" >348</serial_number>
              </transformation>
              <site_order type="int" >1</site_order>
             </second>
            </item>
            <item type="Pair" >
             <first type="Handle" >
              <serial_number type="int" >253</serial_number>
             </first>
             <second type="CrystalSymmetryMatchData" >
              <base type="Handle" >
               <serial_number type="int" >253</serial_number>
              </base>
              <transformation type="Handle" >
               <serial_number type="int" >348</serial_number>
              </transformation>
              <site_order type="int" >1</site_order>
             </second>
            </item>
            <item type="Pair" >
             <first type="Handle" >
              <serial_number type="int" >259</serial_number>
             </first>
             <second type="CrystalSymmetryMatchData" >
              <base type="Handle" >
               <serial_number type="int" >259</serial_number>
              </base>
              <transformation type="Handle" >
               <serial_number type="int" >348</serial_number>
              </transformation>
              <site_order type="int" >1</site_order>
             </second>
            </item>
            <item type="Pair" >
             <first type="Handle" >
              <serial_number type="int" >265</serial_number>
             </first>
             <second type="CrystalSymmetryMatchData" >
              <base type="Handle" >
               <serial_number type="int" >265</serial_number>
              </base>
              <transformation type="Handle" >
               <serial_number type="int" >348</serial_number>
              </transformation>
              <site_order type="int" >1</site_order>
             </second>
            </item>
            <item type="Pair" >
             <first type="Handle" >
              <serial_number type="int" >271</serial_number>
             </first>
             <second type="CrystalSymmetryMatchData" >
              <base type="Handle" >
               <serial_number type="int" >271</serial_number>
              </base>
              <transformation type="Handle" >
               <serial_number type="int" >348</serial_number>
              </transformation>
              <site_order type="int" >1</site_order>
             </second>
            </item>
            <item type="Pair" >
             <first type="Handle" >
              <serial_number type="int" >277</serial_number>
             </first>
             <second type="CrystalSymmetryMatchData" >
              <base type="Handle" >
               <serial_number type="int" >277</serial_number>
              </base>
              <transformation type="Handle" >
               <serial_number type="int" >348</serial_number>
              </transformation>
              <site_order type="int" >1</site_order>
             </second>
            </item>
            <item type="Pair" >
             <first type="Handle" >
              <serial_number type="int" >283</serial_number>
             </first>
             <second type="CrystalSymmetryMatchData" >
              <base type="Handle" >
               <serial_number type="int" >283</serial_number>
              </base>
              <transformation type="Handle" >
               <serial_number type="int" >348</serial_number>
              </transformation>
              <site_order type="int" >1</site_order>
             </second>
            </item>
            <item type="Pair" >
             <first type="Handle" >
              <serial_number type="int" >289</serial_number>
             </first>
             <second type="CrystalSymmetryMatchData" >
              <base type="Handle" >
               <serial_number type="int" >289</serial_number>
              </base>
              <transformation type="Handle" >
               <serial_number type="int" >348</serial_number>
              </transformation>
              <site_order type="int" >1</site_order>
             </second>
            </item>
           </crystal_symmetry_match_data>
          </value>
         </crystal_symmetry_match>
        </value>
       </crystal_structure>
       <crystal_snapshot type="Handle" >
        <serial_number type="int" >349</serial_number>
        <value type="Container" >
         <count type="int" >4</count>
         <item type="Handle" >
          <serial_number type="int" >350</serial_number>
          <value type="MoleculeSubset" >
           <parent_molecule type="Handle" >
            <serial_number type="int" >6</serial_number>
           </parent_molecule>
           <atoms type="Container" >
            <count type="int" >48</count>
            <item type="Handle" >
             <serial_number type="int" >351</serial_number>
             <value type="CrystalStructureViewAtom" >
              <value type="ProxyAtom" >
               <parent_atom type="Handle" >
                <serial_number type="int" >7</serial_number>
               </parent_atom>
              </value>
              <site type="Handle" >
               <serial_number type="int" >352</serial_number>
               <value type="Site" >
                <orthogonal type="Point" >
                 <coordinates type="Vector" >
                  <vector type="Container" >
                   <count type="int" >3</count>
                   <item type="float" >-0.61005266221106491</item>
                   <item type="float" >1.43914421</item>
                   <item type="float" >-0.22040671849301599</item>
                  </vector>
                 </coordinates>
                </orthogonal>
                <fractional type="Point" >
                 <coordinates type="Vector" >
                  <vector type="Container" >
                   <count type="int" >3</count>
                   <item type="float" >-0.062109999999999999</item>
                   <item type="float" >0.20041</item>
                   <item type="float" >-0.0092599999999999991</item>
                  </vector>
                 </coordinates>
                </fractional>
                <uncertain_value type="UncertainValue" >
                 <value type="float" >1</value>
                 <uncertainty type="Uncertainty" >
                  <precision type="int" >0</precision>
                  <uncertainty type="int" >0</uncertainty>
                 </uncertainty>
                </uncertain_value>
                <uncertainty type="Handle" >
                 <serial_number type="int" >353</serial_number>
                 <value type="Container" >
                  <count type="int" >3</count>
                  <item type="Uncertainty" >
                   <precision type="int" >5</precision>
                   <uncertainty type="int" >11</uncertainty>
                  </item>
                  <item type="Uncertainty" >
                   <precision type="int" >5</precision>
                   <uncertainty type="int" >15</uncertainty>
                  </item>
                  <item type="Uncertainty" >
                   <precision type="int" >5</precision>
                   <uncertainty type="int" >4</uncertainty>
                  </item>
                 </value>
                </uncertainty>
                <adps type="Handle" >
                 <serial_number type="int" >354</serial_number>
                 <value type="AtomicDisplacementParameters" >
                  <uvalues type="Container" >
                   <count type="int" >6</count>
                   <item type="UncertainValue" >
                    <value type="float" >0.03889999999999999</value>
                    <uncertainty type="Uncertainty" >
                     <precision type="int" >1000000</precision>
                     <uncertainty type="int" >0</uncertainty>
                    </uncertainty>
                   </item>
                   <item type="UncertainValue" >
                    <value type="float" >0.031399999999999997</value>
                    <uncertainty type="Uncertainty" >
                     <precision type="int" >1000000</precision>
                     <uncertainty type="int" >0</uncertainty>
                    </uncertainty>
                   </item>
                   <item type="UncertainValue" >
                    <value type="float" >0.027199999999999998</value>
                    <uncertainty type="Uncertainty" >
                     <precision type="int" >1000000</precision>
                     <uncertainty type="int" >0</uncertainty>
                    </uncertainty>
                   </item>
                   <item type="UncertainValue" >
                    <value type="float" >-0.0038999999999999998</value>
                    <uncertainty type="Uncertainty" >
                     <precision type="int" >1000000</precision>
                     <uncertainty type="int" >0</uncertainty>
                    </uncertainty>
                   </item>
                   <item type="UncertainValue" >
                    <value type="float" >0.0080000000000000002</value>
                    <uncertainty type="Uncertainty" >
                     <precision type="int" >1000000</precision>
                     <uncertainty type="int" >0</uncertainty>
                    </uncertainty>
                   </item>
                   <item type="UncertainValue" >
                    <value type="float" >0.0044000000000000003</value>
                    <uncertainty type="Uncertainty" >
                     <precision type="int" >1000000</precision>
                     <uncertainty type="int" >0</uncertainty>
                    </uncertainty>
                   </item>
                  </uvalues>
                  <type type="AtomicDisplacementParameters::Type" >
                   <enumerator type="int" >0</enumerator>
                  </type>
                  <u_equivalent type="float" >0.032178506387979942</u_equivalent>
                 </value>
                </adps>
               </value>
              </site>
             </value>
            </item>
            <item type="Handle" >
             <serial_number type="int" >355</serial_number>
             <value type="CrystalStructureViewAtom" >
              <value type="ProxyAtom" >
               <parent_atom type="Handle" >
                <serial_number type="int" >13</serial_number>
               </parent_atom>
              </value>
              <site type="Handle" >
               <serial_number type="int" >356</serial_number>
               <value type="Site" >
                <orthogonal type="Point" >
                 <coordinates type="Vector" >
                  <vector type="Container" >
                   <count type="int" >3</count>
                   <item type="float" >-1.7811262945329551</item>
                   <item type="float" >0.39926360000000027</item>
                   <item type="float" >4.1663058320753263</item>
                  </vector>
                 </coordinates>
                </orthogonal>
                <fractional type="Point" >
                 <coordinates type="Vector" >
                  <vector type="Container" >
                   <count type="int" >3</count>
                   <item type="float" >-0.1157</item>
                   <item type="float" >0.055599999999999997</item>
                   <item type="float" >0.17504</item>
                  </vector>
                 </coordinates>
                </fractional>
                <uncertain_value type="UncertainValue" >
                 <value type="float" >0.097000000000000003</value>
                 <uncertainty type="Uncertainty" >
                  <precision type="int" >3</precision>
                  <uncertainty type="int" >4</uncertainty>
                 </uncertainty>
                </uncertain_value>
                <uncertainty type="Handle" >
                 <serial_number type="int" >357</serial_number>
                 <value type="Container" >
                  <count type="int" >3</count>
                  <item type="Uncertainty" >
                   <precision type="int" >4</precision>
                   <uncertainty type="int" >12</uncertainty>
                  </item>
                  <item type="Uncertainty" >
                   <precision type="int" >4</precision>
                   <uncertainty type="int" >16</uncertainty>
                  </item>
                  <item type="Uncertainty" >
                   <precision type="int" >5</precision>
                   <uncertainty type="int" >12</uncertainty>
                  </item>
                 </value>
                </uncertainty>
                <adps type="Handle" >
                 <serial_number type="int" >358</serial_number>
                 <value type="AtomicDisplacementParameters" >
                  <uvalues type="Container" >
                   <count type="int" >6</count>
                   <item type="UncertainValue" >
                    <value type="float" >0.038999999999999993</value>
                    <uncertainty type="Uncertainty" >
                     <precision type="int" >1000000</precision>
                     <uncertainty type="int" >0</uncertainty>
                    </uncertainty>
                   </item>
                   <item type="UncertainValue" >
                    <value type="float" >0.038000000000000006</value>
                    <uncertainty type="Uncertainty" >
                     <precision type="int" >1000000</precision>
                     <uncertainty type="int" >0</uncertainty>
                    </uncertainty>
                   </item>
                   <item type="UncertainValue" >
                    <value type="float" >0.032000000000000008</value>
                    <uncertainty type="Uncertainty" >
                     <precision type="int" >1000000</precision>
                     <uncertainty type="int" >0</uncertainty>
                    </uncertainty>
                   </item>
                   <item type="UncertainValue" >
                    <value type="float" >-0.014</value>
                    <uncertainty type="Uncertainty" >
                     <precision type="int" >1000000</precision>
                     <uncertainty type="int" >0</uncertainty>
                    </uncertainty>
                   </item>
                   <item type="UncertainValue" >
                    <value type="float" >-0.0040000000000000001</value>
                    <uncertainty type="Uncertainty" >
                     <precision type="int" >1000000</precision>
                     <uncertainty type="int" >0</uncertainty>
                    </uncertainty>
                   </item>
                   <item type="UncertainValue" >
                    <value type="float" >0.0050000000000000001</value>
                    <uncertainty type="Uncertainty" >
                     <precision type="int" >1000000</precision>
                     <uncertainty type="int" >0</uncertainty>
                    </uncertainty>
                   </item>
                  </uvalues>
                  <type type="AtomicDisplacementParameters::Type" >
                   <enumerator type="int" >0</enumerator>
                  </type>
                  <u_equivalent type="float" >0.037182262726440769</u_equivalent>
                 </value>
                </adps>
               </value>
              </site>
             </value>
            </item>
            <item type="Handle" >
             <serial_number type="int" >359</serial_number>
             <value type="CrystalStructureViewAtom" >
              <value type="ProxyAtom" >
               <parent_atom type="Handle" >
                <serial_number type="int" >19</serial_number>
               </parent_atom>
              </value>
              <site type="Handle" >
               <serial_number type="int" >360</serial_number>
               <value type="Site" >
                <orthogonal type="Point" >
                 <coordinates type="Vector" >
                  <vector type="Container" >
                   <count type="int" >3</count>
                   <item type="float" >-1.2258615646810376</item>
                   <item type="float" >0.95248784000000009</item>
                   <item type="float" >0.78641878822994049</item>
                  </vector>
                 </coordinates>
                </orthogonal>
                <fractional type="Point" >
                 <coordinates type="Vector" >
                  <vector type="Container" >
                   <count type="int" >3</count>
                   <item type="float" >-0.10803</item>
                   <item type="float" >0.13264000000000001</item>
                   <item type="float" >0.03304</item>
                  </vector>
                 </coordinates>
                </fractional>
                <uncertain_value type="UncertainValue" >
                 <value type="float" >1</value>
                 <uncertainty type="Uncertainty" >
                  <precision type="int" >0</precision>
                  <uncertainty type="int" >0</uncertainty>
                 </uncertainty>
                </uncertain_value>
                <uncertainty type="Handle" >
                 <serial_number type="int" >361</serial_number>
                 <value type="Container" >
                  <count type="int" >3</count>
                  <item type="Uncertainty" >
                   <precision type="int" >5</precision>
                   <uncertainty type="int" >12</uncertainty>
                  </item>
                  <item type="Uncertainty" >
                   <precision type="int" >5</precision>
                   <uncertainty type="int" >17</uncertainty>
                  </item>
                  <item type="Uncertainty" >
                   <precision type="int" >5</precision>
                   <uncertainty type="int" >5</uncertainty>
                  </item>
                 </value>
                </uncertainty>
                <adps type="Handle" >
                 <serial_number type="int" >362</serial_number>
                 <value type="AtomicDisplacementParameters" >
                  <uvalues type="Container" >
                   <count type="int" >6</count>
                   <item type="UncertainValue" >
                    <value type="float" >0.029399999999999992</value>
                    <uncertainty type="Uncertainty" >
                     <precision type="int" >1000000</precision>
                     <uncertainty type="int" >0</uncertainty>
                    </uncertainty>
                   </item>
                   <item type="UncertainValue" >
                    <value type="float" >0.026400000000000007</value>
                    <uncertainty type="Uncertainty" >
                     <precision type="int" >1000000</precision>
                     <uncertainty type="int" >0</uncertainty>
                    </uncertainty>
                   </item>
                   <item type="UncertainValue" >
                    <value type="float" >0.0241</value>
                    <uncertainty type="Uncertainty" >
                     <precision type="int" >1000000</precision>
                     <uncertainty type="int" >0</uncertainty>
                    </uncertainty>
                   </item>
                   <item type="UncertainValue" >
                    <value type="float" >-0.0038999999999999998</value>
                    <uncertainty type="Uncertainty" >
                     <precision type="int" >1000000</precision>
                     <uncertainty type="int" >0</uncertainty>
                    </uncertainty>
                   </item>
                   <item type="UncertainValue" >
                    <value type="float" >0.0047999999999999987</value>
                    <uncertainty type="Uncertainty" >
                     <precision type="int" >1000000</precision>
                     <uncertainty type="int" >0</uncertainty>
                    </uncertainty>
                   </item>
                   <item type="UncertainValue" >
                    <value type="float" >0</value>
                    <uncertainty type="Uncertainty" >
                     <precision type="int" >1000000</precision>
                     <uncertainty type="int" >0</uncertainty>
                    </uncertainty>
                   </item>
                  </uvalues>
                  <type type="AtomicDisplacementParameters::Type" >
                   <enumerator type="int" >0</enumerator>
                  </type>
                  <u_equivalent type="float" >0.02653197437905189</u_equivalent>
                 </value>
                </adps>
               </value>
              </site>
             </value>
            </item>
            <item type="Handle" >
             <serial_number type="int" >363</serial_number>
             <value type="CrystalStructureViewAtom" >
              <value type="ProxyAtom" >
               <parent_atom type="Handle" >
                <serial_number type="int" >25</serial_number>
               </parent_atom>
              </value>
              <site type="Handle" >
               <serial_number type="int" >364</serial_number>
               <value type="Site" >
                <orthogonal type="Point" >
                 <coordinates type="Vector" >
                  <vector type="Container" >
                   <count type="int" >3</count>
                   <item type="float" >-1.6139546721917151</item>
                   <item type="float" >0.32070346000000022</item>
                   <item type="float" >2.9055127566352552</item>
                  </vector>
                 </coordinates>
                </orthogonal>
                <fractional type="Point" >
                 <coordinates type="Vector" >
                  <vector type="Container" >
                   <count type="int" >3</count>
                   <item type="float" >-0.11670999999999999</item>
                   <item type="float" >0.044659999999999998</item>
                   <item type="float" >0.12207</item>
                  </vector>
                 </coordinates>
                </fractional>
                <uncertain_value type="UncertainValue" >
                 <value type="float" >1</value>
                 <uncertainty type="Uncertainty" >
                  <precision type="int" >0</precision>
                  <uncertainty type="int" >0</uncertainty>
                 </uncertainty>
                </uncertain_value>
                <uncertainty type="Handle" >
                 <serial_number type="int" >365</serial_number>
                 <value type="Container" >
                  <count type="int" >3</count>
                  <item type="Uncertainty" >
                   <precision type="int" >5</precision>
                   <uncertainty type="int" >13</uncertainty>
                  </item>
                  <item type="Uncertainty" >
                   <precision type="int" >5</precision>
                   <uncertainty type="int" >18</uncertainty>
                  </item>
                  <item type="Uncertainty" >
                   <precision type="int" >5</precision>
                   <uncertainty type="int" >5</uncertainty>
                  </item>
                 </value>
                </uncertainty>
                <adps type="Handle" >
                 <serial_number type="int" >366</serial_number>
                 <value type="AtomicDisplacementParameters" >
                  <uvalues type="Container" >
                   <count type="int" >6</count>
                   <item type="UncertainValue" >
                    <value type="float" >0.030099999999999995</value>
                    <uncertainty type="Uncertainty" >
                     <precision type="int" >1000000</precision>
                     <uncertainty type="int" >0</uncertainty>
                    </uncertainty>
                   </item>
                   <item type="UncertainValue" >
                    <value type="float" >0.029200000000000011</value>
                    <uncertainty type="Uncertainty" >
                     <precision type="int" >1000000</precision>
                     <uncertainty type="int" >0</uncertainty>
                    </uncertainty>
                   </item>
                   <item type="UncertainValue" >
                    <value type="float" >0.026200000000000008</value>
                    <uncertainty type="Uncertainty" >
                     <precision type="int" >1000000</precision>
                     <uncertainty type="int" >0</uncertainty>
                    </uncertainty>
                   </item>
                   <item type="UncertainValue" >
                    <value type="float" >-0.0044999999999999997</value>
                    <uncertainty type="Uncertainty" >
                     <precision type="int" >1000000</precision>
                     <uncertainty type="int" >0</uncertainty>
                    </uncertainty>
                   </item>
                   <item type="UncertainValue" >
                    <value type="float" >0.0029999999999999996</value>
                    <uncertainty type="Uncertainty" >
                     <precision type="int" >1000000</precision>
                     <uncertainty type="int" >0</uncertainty>
                    </uncertainty>
                   </item>
                   <item type="UncertainValue" >
                    <value type="float" >-0.0023000000000000004</value>
                    <uncertainty type="Uncertainty" >
                     <precision type="int" >1000000</precision>
                     <uncertainty type="int" >0</uncertainty>
                    </uncertainty>
                   </item>
                  </uvalues>
                  <type type="AtomicDisplacementParameters::Type" >
                   <enumerator type="int" >0</enumerator>
                  </type>
                  <u_equivalent type="float" >0.028587862324862084</u_equivalent>
                 </value>
                </adps>
               </value>
              </site>
             </value>
            </item>
            <item type="Handle" >
             <serial_number type="int" >367</serial_number>
             <value type="CrystalStructureViewAtom" >
              <value type="ProxyAtom" >
               <parent_atom type="Handle" >
                <serial_number type="int" >31</serial_number>
               </parent_atom>
              </value>
              <site type="Handle" >
               <serial_number type="int" >368</serial_number>
               <value type="Site" >
                <orthogonal type="Point" >
                 <coordinates type="Vector" >
                  <vector type="Container" >
                   <count type="int" >3</count>
                   <item type="float" >-2.6836824460555135</item>
                   <item type="float" >0.6168479</item>
                   <item type="float" >0.77427975729781984</item>
                  </vector>
                 </coordinates>
                </orthogonal>
                <fractional type="Point" >
                 <coordinates type="Vector" >
                  <vector type="Container" >
                   <count type="int" >3</count>
                   <item type="float" >-0.24943000000000001</item>
                   <item type="float" >0.085900000000000004</item>
                   <item type="float" >0.032530000000000003</item>
                  </vector>
                 </coordinates>
                </fractional>
                <uncertain_value type="UncertainValue" >
                 <value type="float" >1</value>
                 <uncertainty type="Uncertainty" >
                  <precision type="int" >0</precision>
                  <uncertainty type="int" >0</uncertainty>
                 </uncertainty>
                </uncertain_value>
                <uncertainty type="Handle" >
                 <serial_number type="int" >369</serial_number>
                 <value type="Container" >
                  <count type="int" >3</count>
                  <item type="Uncertainty" >
                   <precision type="int" >5</precision>
                   <uncertainty type="int" >14</uncertainty>
                  </item>
                  <item type="Uncertainty" >
                   <precision type="int" >4</precision>
                   <uncertainty type="int" >2</uncertainty>
                  </item>
                  <item type="Uncertainty" >
                   <precision type="int" >5</precision>
                   <uncertainty type="int" >6</uncertainty>
                  </item>
                 </value>
                </uncertainty>
                <adps type="Handle" >
                 <serial_number type="int" >370</serial_number>
                 <value type="AtomicDisplacementParameters" >
                  <uvalues type="Container" >
                   <count type="int" >6</count>
                   <item type="UncertainValue" >
                    <value type="float" >0.026199999999999998</value>
                    <uncertainty type="Uncertainty" >
                     <precision type="int" >1000000</precision>
                     <uncertainty type="int" >0</uncertainty>
                    </uncertainty>
                   </item>
                   <item type="UncertainValue" >
                    <value type="float" >0.025500000000000009</value>
                    <uncertainty type="Uncertainty" >
                     <precision type="int" >1000000</precision>
                     <uncertainty type="int" >0</uncertainty>
                    </uncertainty>
                   </item>
                   <item type="UncertainValue" >
                    <value type="float" >0.025600000000000005</value>
                    <uncertainty type="Uncertainty" >
                     <precision type="int" >1000000</precision>
                     <uncertainty type="int" >0</uncertainty>
                    </uncertainty>
                   </item>
                   <item type="UncertainValue" >
                    <value type="float" >-0.0017999999999999997</value>
                    <uncertainty type="Uncertainty" >
                     <precision type="int" >1000000</precision>
                     <uncertainty type="int" >0</uncertainty>
                    </uncertainty>
                   </item>
                   <item type="UncertainValue" >
                    <value type="float" >0.0038999999999999998</value>
                    <uncertainty type="Uncertainty" >
                     <precision type="int" >1000000</precision>
                     <uncertainty type="int" >0</uncertainty>
                    </uncertainty>
                   </item>
                   <item type="UncertainValue" >
                    <value type="float" >-0.00010000000000000002</value>
                    <uncertainty type="Uncertainty" >
                     <precision type="int" >1000000</precision>
                     <uncertainty type="int" >0</uncertainty>
                    </uncertainty>
                   </item>
                  </uvalues>
                  <type type="AtomicDisplacementParameters::Type" >
                   <enumerator type="int" >0</enumerator>
                  </type>
                  <u_equivalent type="float" >0.025739415074494214</u_equivalent>
                 </value>
                </adps>
               </value>
              </site>
             </value>
            </item>
            <item type="Handle" >
             <serial_number type="int" >371</serial_number>
             <value type="CrystalStructureViewAtom" >
              <value type="ProxyAtom" >
               <parent_atom type="Handle" >
                <serial_number type="int" >37</serial_number>
               </parent_atom>
              </value>
              <site type="Handle" >
               <serial_number type="int" >372</serial_number>
               <value type="Site" >
                <orthogonal type="Point" >
                 <coordinates type="Vector" >
                  <vector type="Container" >
                   <count type="int" >3</count>
                   <item type="float" >-3.4255517821927817</item>
                   <item type="float" >1.9553863</item>
                   <item type="float" >0.88805341975965746</item>
                  </vector>
                 </coordinates>
                </orthogonal>
                <fractional type="Point" >
                 <coordinates type="Vector" >
                  <vector type="Container" >
                   <count type="int" >3</count>
                   <item type="float" >-0.31974999999999998</item>
                   <item type="float" >0.27229999999999999</item>
                   <item type="float" >0.037310000000000003</item>
                  </vector>
                 </coordinates>
                </fractional>
                <uncertain_value type="UncertainValue" >
                 <value type="float" >1</value>
                 <uncertainty type="Uncertainty" >
                  <precision type="int" >0</precision>
                  <uncertainty type="int" >0</uncertainty>
                 </uncertainty>
                </uncertain_value>
                <uncertainty type="Handle" >
                 <serial_number type="int" >373</serial_number>
                 <value type="Container" >
                  <count type="int" >3</count>
                  <item type="Uncertainty" >
                   <precision type="int" >5</precision>
                   <uncertainty type="int" >16</uncertainty>
                  </item>
                  <item type="Uncertainty" >
                   <precision type="int" >4</precision>
                   <uncertainty type="int" >2</uncertainty>
                  </item>
                  <item type="Uncertainty" >
                   <precision type="int" >5</precision>
                   <uncertainty type="int" >7</uncertainty>
                  </item>
                 </value>
                </uncertainty>
                <adps type="Handle" >
                 <serial_number type="int" >374</serial_number>
                 <value type="AtomicDisplacementParameters" >
                  <uvalues type="Container" >
                   <count type="int" >6</count>
                   <item type="UncertainValue" >
                    <value type="float" >0.037099999999999994</value>
                    <uncertainty type="Uncertainty" >
                     <precision type="int" >1000000</precision>
                     <uncertainty type="int" >0</uncertainty>
                    </uncertainty>
                   </item>
                   <item type="UncertainValue" >
                    <value type="float" >0.026000000000000002</value>
                    <uncertainty type="Uncertainty" >
                     <precision type="int" >1000000</precision>
                     <uncertainty type="int" >0</uncertainty>
                    </uncertainty>
                   </item>
                   <item type="UncertainValue" >
                    <value type="float" >0.037400000000000003</value>
                    <uncertainty type="Uncertainty" >
                     <precision type="int" >1000000</precision>
                     <uncertainty type="int" >0</uncertainty>
                    </uncertainty>
                   </item>
                   <item type="UncertainValue" >
                    <value type="float" >0.0024999999999999996</value>
                    <uncertainty type="Uncertainty" >
                     <precision type="int" >1000000</precision>
                     <uncertainty type="int" >0</uncertainty>
                    </uncertainty>
                   </item>
                   <item type="UncertainValue" >
[truncated: 1,581,669 more chars]
