# Supplementary material for: Radicals organized by disk shaped aromatics – polymorphism and co-crystals that tune inter-electron exchange
Source: Royal Society of Chemistry journal article supplement (doi:10.1039/c1ce06096a), 2011-12-17
Supplement: c1ce06096a_5.mryx [file c1ce06096a_5.mryx]

Archive with 1 entries (1 files):
- c1ce06096a_5.mryx.out
